# Supplementary material for: Revitalizing the concept of bond order through delocalization measures in real space
Source: PubMed Central journal article supplement — Chem Sci. 2018 Jun 13;9(25):5517–29. doi: 10.1039/c8sc01338a (PMC6049528; doi:10.1039/c8sc01338a), 2018-06-13
Supplement: SC-009-C8SC01338A-s001.pdf [file SC-009-C8SC01338A-s001.pdf]

# ELECTRONIC SUPPLEMENTARY INFORMATION

## Revitalizing the concept of bond order through delocalization measure in real space

C Outeiral<sup>‡,†</sup>, M Vincent<sup>‡</sup>, A Martín Pendás<sup>†</sup>, PLA Popelier<sup>\*‡</sup>

<sup>‡</sup> *Manchester Institute of Biotechnology (MIB), 131 Princess Street, Manchester M1 7DN, UK  
School of Chemistry, University of Manchester, Oxford Road, Manchester M13 9PL, UK*

<sup>†</sup> *Department of Physical and Analytical Chemistry, University of Oviedo, Julián Clavería 8,  
Oviedo, Spain*

|                             |    |
|-----------------------------|----|
| Computational details.....  | 7  |
| Acids and derivatives ..... | 8  |
| Formyl chloride .....       | 8  |
| Formyl bromide.....         | 9  |
| Methyl formamide .....      | 10 |
| Acetyl bromide.....         | 12 |
| Propanamide .....           | 13 |
| Acetic acid.....            | 17 |
| Formic anhydride .....      | 19 |
| Acetic anhydride .....      | 20 |
| Methyl formiate .....       | 23 |
| Ethyl formamide.....        | 25 |
| Propanoic acid.....         | 27 |
| Acetophenone.....           | 29 |
| Formic acid.....            | 33 |
| Formamide .....             | 34 |
| Methyl propanoate.....      | 36 |
| Acetyl chloride .....       | 39 |
| Phenyl acetamide.....       | 40 |

|                             |     |
|-----------------------------|-----|
| Methyl acetate .....        | 44  |
| Phenyl acetate .....        | 47  |
| Alcohols .....              | 51  |
| Methanol.....               | 51  |
| Propanol .....              | 53  |
| Ethanol .....               | 55  |
| Aldehydes and ketones ..... | 57  |
| Pentanal .....              | 57  |
| Propanal.....               | 60  |
| Isobutyraldehyde.....       | 63  |
| Ethyl methyl ketone.....    | 66  |
| Diethyl ketone .....        | 70  |
| Heptanal.....               | 73  |
| Butanal .....               | 79  |
| Hexanal.....                | 82  |
| Acetaldehyde .....          | 86  |
| Formaldehyde .....          | 88  |
| Dimethyl ketone .....       | 89  |
| Pivaldehyde.....            | 92  |
| Alkanes.....                | 95  |
| Propane.....                | 95  |
| Butane.....                 | 98  |
| Ethane.....                 | 103 |
| Methane .....               | 105 |
| Alkenes.....                | 106 |
| Ethylene .....              | 106 |
| Cyclobutadiene .....        | 108 |
| Cyclopentadiene .....       | 109 |
| Allyl.....                  | 111 |
| Alkynes.....                | 113 |
| Propyne.....                | 113 |
| 1,3,5-Hexatriyne-hf.....    | 115 |
| 2-Butyne .....              | 116 |
| Acetylene .....             | 119 |

|                           |     |
|---------------------------|-----|
| Amines.....               | 120 |
| Ethylamine.....           | 120 |
| Methylamine.....          | 122 |
| Diethylamine.....         | 124 |
| Dipropylamine.....        | 127 |
| Propylamine.....          | 133 |
| Aminoacids.....           | 136 |
| Lysine.....               | 136 |
| Aspartic acid.....        | 143 |
| Alanine.....              | 146 |
| Glycine.....              | 149 |
| Methionine.....           | 151 |
| Glutamine.....            | 156 |
| Arginine.....             | 161 |
| Glutamic acid.....        | 169 |
| Asparagine.....           | 173 |
| Leucine.....              | 177 |
| Cysteine.....             | 183 |
| Histidine.....            | 186 |
| Phenylalanine.....        | 191 |
| Valine.....               | 197 |
| Tryptophan.....           | 201 |
| Isoleucine.....           | 209 |
| Threonine.....            | 215 |
| Proline.....              | 219 |
| Serine.....               | 223 |
| Tyrosine.....             | 226 |
| Aromatics.....            | 233 |
| Benzene.....              | 233 |
| Anisole.....              | 237 |
| Benzenesulfonic acid..... | 240 |
| Benzoic acid.....         | 243 |
| (18)Annulene.....         | 246 |
| Fluorobenzene.....        | 260 |

|                               |     |
|-------------------------------|-----|
| Nitrobenzene .....            | 262 |
| Bromobenzene .....            | 265 |
| Chlorobenzene .....           | 267 |
| Heptalene .....               | 269 |
| (16)Annulene .....            | 275 |
| Azulene.....                  | 286 |
| Phenol.....                   | 290 |
| Aniline .....                 | 293 |
| Pentalene.....                | 296 |
| Benzaldehyde .....            | 299 |
| Toluene .....                 | 302 |
| Cyanides and isocyanides..... | 305 |
| Isoacetonitrile .....         | 305 |
| Propanenitrile .....          | 307 |
| Butanenitrile.....            | 309 |
| Isocyanofornitrile.....       | 313 |
| Hydrogen cyanide.....         | 314 |
| Hydrogen isocyanide.....      | 315 |
| Cyanogen .....                | 316 |
| Acrylonitrile .....           | 317 |
| Isocyanoethyne.....           | 319 |
| Propiolonitrile.....          | 320 |
| Isocyanoethene.....           | 321 |
| Acetonitrile.....             | 323 |
| Isocyanoethane.....           | 325 |
| Isocyanopropane.....          | 327 |
| Diazocompounds .....          | 331 |
| Diazobenzene .....            | 331 |
| o-hydroxydiazobenzene.....    | 338 |
| m-hydroxydiazobenzene .....   | 345 |
| o-aminodiazobenzene.....      | 352 |
| p-hydroxydiazobenzene .....   | 360 |
| p-aminodiazobenzene.....      | 367 |
| m-aminodiazobenzene .....     | 375 |

|                                  |     |
|----------------------------------|-----|
| Ethers.....                      | 383 |
| Ethyl methyl ether.....          | 383 |
| Diethyl ether.....               | 385 |
| Dimethyl ether.....              | 388 |
| Haloalkanes.....                 | 390 |
| Carbon tetrafluoride.....        | 390 |
| Difluoromethane.....             | 391 |
| Dibromomethane.....              | 392 |
| Dichloromethane.....             | 393 |
| Inorganics.....                  | 394 |
| Osmium oxide (VIII).....         | 394 |
| Magnesium oxide.....             | 395 |
| Hexafluorophosphate anion.....   | 396 |
| Sulfur hexafluoride.....         | 398 |
| Platinate (VII) anion.....       | 400 |
| Sodium chloride.....             | 401 |
| Lithium hydride.....             | 402 |
| Hydrogen disulfide.....          | 403 |
| Tetrafluoroberyllate anion.....  | 404 |
| Hexafluoroaluminate anion.....   | 405 |
| Tetrafluoroammonium.....         | 407 |
| Water.....                       | 408 |
| Carbon monoxide.....             | 409 |
| Tetrafluoroborate anion.....     | 410 |
| Chlorine hexafluoride anion..... | 411 |
| Oxygen.....                      | 413 |
| Orthotungstate anion.....        | 414 |
| Hydrogen sulfide.....            | 415 |
| Ozone.....                       | 416 |
| Hexafluorosilicate anion.....    | 417 |
| Renate (VII) anion.....          | 419 |
| Borane.....                      | 420 |
| Diborane.....                    | 421 |
| Hydrogen peroxide.....           | 423 |

|                           |     |
|---------------------------|-----|
| Nitrogen.....             | 424 |
| Azide anion.....          | 425 |
| Hydrogen.....             | 426 |
| Ammonia.....              | 427 |
| Nitroderivatives.....     | 428 |
| Nitropropane.....         | 428 |
| Nitromethane.....         | 431 |
| Nitroethane.....          | 432 |
| Nitrogenated bases.....   | 434 |
| Cytosine.....             | 434 |
| Thymine.....              | 438 |
| Uracil.....               | 443 |
| Guanine.....              | 445 |
| Adenine.....              | 451 |
| Pyrroles.....             | 456 |
| N-methylpyrrole.....      | 456 |
| Pyrrole.....              | 459 |
| 2-methylpyrrole.....      | 462 |
| 3-methylpyrrole.....      | 465 |
| Silicon compounds.....    | 468 |
| Silane.....               | 468 |
| Tetramethylsilane.....    | 469 |
| Tetraethylsilane.....     | 473 |
| Trimethylsilanol.....     | 482 |
| Sulfides and thiols.....  | 485 |
| Diethyl sulfide.....      | 485 |
| Ethyl methyl sulfide..... | 490 |
| Dimethyl sulfide.....     | 492 |
| Methanethiol.....         | 494 |
| Ethanethiol.....          | 496 |
| Thiophenes.....           | 498 |
| 3-Nitrothiophene.....     | 498 |
| 3-Lithiumthiophene.....   | 500 |
| 2-Nitrothiophene.....     | 502 |

|                              |     |
|------------------------------|-----|
| 2-Thiophenecarbaldehyde..... | 504 |
| Thiophene.....               | 506 |
| 2-Lithiumthiophene.....      | 508 |
| 3-Bromothiophene.....        | 510 |
| 3-Thiophenecarbaldehyde..... | 512 |
| 2-Bromothiophene.....        | 514 |

## COMPUTATIONAL DETAILS

All the following molecules have been optimized using the software **GAUSSIAN 09**, and the basis set *6-311++G(2d,2p)*. The delocalization indices have been computed using the software **AIMAll**. It is important to regard that this software uses Müller's approximation for correlated wavefunctions, which in certain cases can differ from the exact result.

The graphs have been plotted to be as congruent as possible with the results. In this way, the atoms have been plotted according to their Cartesian coordinates, and the bonds have been drawn where, and only where, a bond critical point appears. This means that some *non-classical* bonds (mainly hydrogen bonds) appear, and also some classical bonds are not present (particularly in the alkynes, where instead of BCPs, NNACPs are found).

## ACIDS AND DERIVATIVES

### FORMYL CHLORIDE

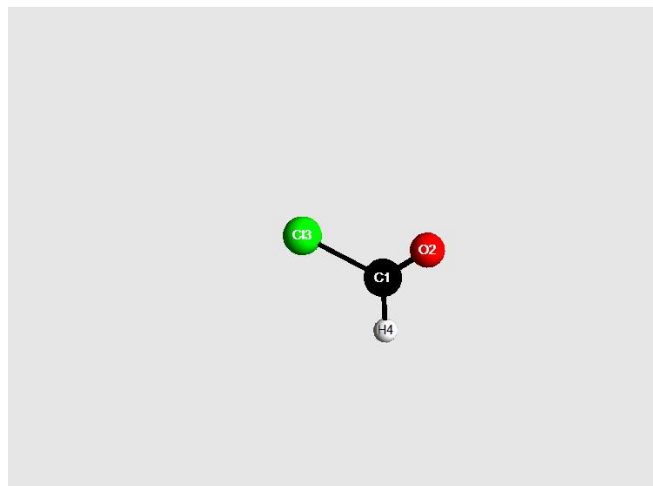

#### HARTREE-FOCK

| Atom A | Atom B | Delocalization index |
|--------|--------|----------------------|
| C1     | O2     | 1.3330253657         |
| C1     | Cl3    | 0.97807406875        |
| O2     | Cl3    | 0.24647441514        |
| C1     | H4     | 0.87045819503        |
| O2     | H4     | 0.097166897984       |
| Cl3    | H4     | 0.08592645799        |



## FORMYL BROMIDE

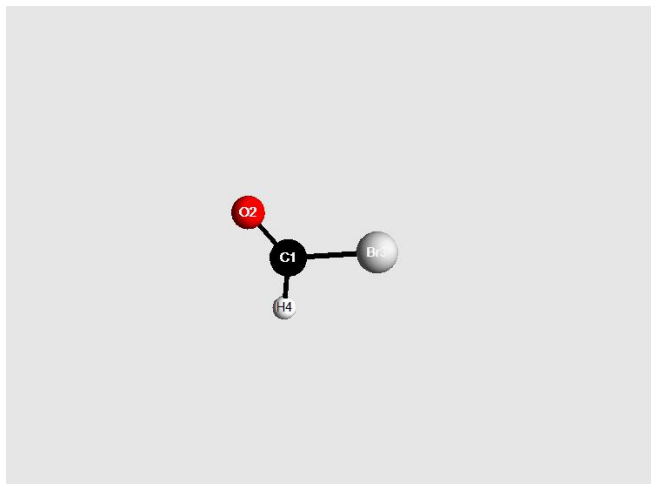

## HARTREE-FOCK

| Atom A | Atom B | Delocalization index |
|--------|--------|----------------------|
| C1     | O2     | 1.3661149919         |
| C1     | Br3    | 1.0016365312         |
| O2     | Br3    | 0.23992451296        |
| C1     | H4     | 0.86977618765        |
| O2     | H4     | 0.095251082632       |
| Br3    | H4     | 0.089780608627       |

## METHYL FORMAMIDE

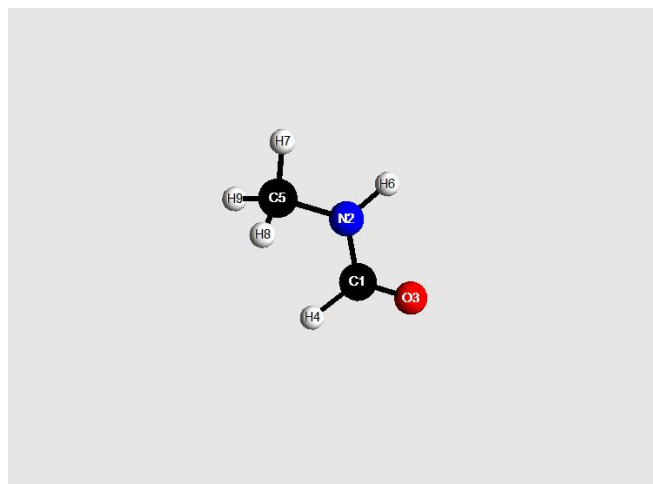

### HARTREE-FOCK

| Atom A | Atom B | Delocalization index |
|--------|--------|----------------------|
| C1     | N2     | 0.89987749577        |
| C1     | O3     | 1.1271647675         |
| N2     | O3     | 0.27608560649        |
| C1     | H4     | 0.85933802616        |
| N2     | H4     | 0.07981833403        |
| O3     | H4     | 0.11391747209        |
| C1     | C5     | 0.020528479494       |
| N2     | C5     | 0.89947302224        |
| O3     | C5     | 0.014598677515       |
| H4     | C5     | 0.009980549067       |
| C1     | H6     | 0.015038819222       |
| N2     | H6     | 0.79877248319        |
| O3     | H6     | 0.012748411122       |
| H4     | H6     | 0.0091490596173      |
| C5     | H6     | 0.016769894754       |
| C1     | H7     | 0.0053656109483      |
| N2     | H7     | 0.067875649466       |
| O3     | H7     | 0.0019925190519      |
| H4     | H7     | 0.0016590989037      |
| C5     | H7     | 0.94006136212        |
| H6     | H7     | 0.0034951933484      |
| C1     | H8     | 0.004855531977       |
| N2     | H8     | 0.070402779616       |
| O3     | H8     | 0.0041233563498      |
| H4     | H8     | 0.0036551276077      |
| C5     | H8     | 0.93852262705        |
| H6     | H8     | 0.0031326946793      |
| H7     | H8     | 0.039146199001       |
| C1     | H9     | 0.0048579547529      |
| N2     | H9     | 0.070410363019       |

|    |    |                 |
|----|----|-----------------|
| O3 | H9 | 0.0041232730315 |
| H4 | H9 | 0.0036550990968 |
| C5 | H9 | 0.93853170117   |
| H6 | H9 | 0.003132677093  |
| H7 | H9 | 0.039145975525  |
| H8 | H9 | 0.040682228933  |

#### CCSD

| Atom A | Atom B | Delocalization index |
|--------|--------|----------------------|
| C1     | N2     | 0.893676114          |
| C1     | O3     | 1.1098961686         |
| N2     | O3     | 0.19906342308        |
| C1     | H4     | 0.74954341717        |
| N2     | H4     | 0.058751173405       |
| O3     | H4     | 0.085160110174       |
| C1     | C5     | 0.021203032611       |
| N2     | C5     | 0.82848216253        |
| O3     | C5     | 0.013653062505       |
| H4     | C5     | 0.011278472214       |
| C1     | H6     | 0.015194736212       |
| N2     | H6     | 0.71452198606        |
| O3     | H6     | 0.01469381867        |
| H4     | H6     | 0.0084911425876      |
| C5     | H6     | 0.015709425935       |
| C1     | H7     | 0.0048306945395      |
| N2     | H7     | 0.04910901147        |
| O3     | H7     | 0.001842961334       |
| H4     | H7     | 0.0015344448999      |
| C5     | H7     | 0.81375408618        |
| H6     | H7     | 0.0033974307651      |
| C1     | H8     | 0.0048341029046      |
| N2     | H8     | 0.050938494017       |
| O3     | H8     | 0.0039235075916      |
| H4     | H8     | 0.0040953268073      |
| C5     | H8     | 0.81040116643        |
| H6     | H8     | 0.0028103064721      |
| H7     | H8     | 0.030631481894       |
| C1     | H9     | 0.0048328533595      |
| N2     | H9     | 0.05094653077        |
| O3     | H9     | 0.0039235487635      |
| H4     | H9     | 0.0040955500105      |
| C5     | H9     | 0.81040463661        |
| H6     | H9     | 0.002810332879       |
| H7     | H9     | 0.030631113139       |
| H8     | H9     | 0.031650329919       |

## ACETYL BROMIDE

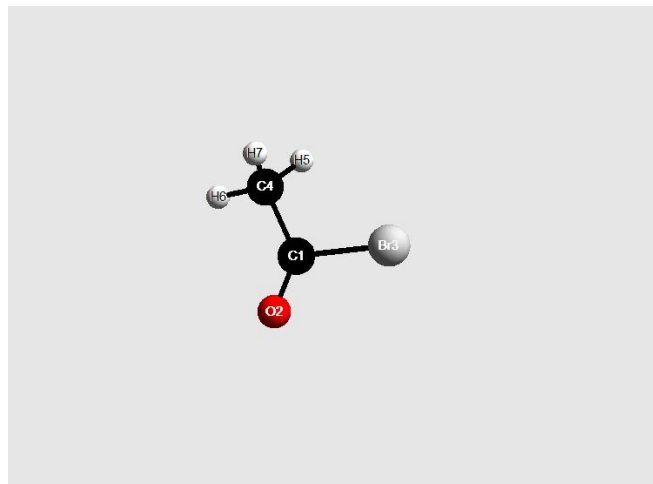

### HARTREE-FOCK

| Atom A | Atom B | Delocalization index |
|--------|--------|----------------------|
| C1     | O2     | 1.3217120271         |
| C1     | Br3    | 0.92972329653        |
| O2     | Br3    | 0.23898233824        |
| C1     | C4     | 0.92976437384        |
| O2     | C4     | 0.10063503422        |
| Br3    | C4     | 0.098447353641       |
| C1     | H5     | 0.049833647722       |
| O2     | H5     | 0.016846385274       |
| Br3    | H5     | 0.018232263041       |
| C4     | H5     | 0.94659318784        |
| C1     | H6     | 0.039606221507       |
| O2     | H6     | 0.016681979976       |
| Br3    | H6     | 0.018400376525       |
| C4     | H6     | 0.951940723          |
| H5     | H6     | 0.033672360478       |
| C1     | H7     | 0.049813861562       |
| O2     | H7     | 0.01684644479        |
| Br3    | H7     | 0.018226545412       |
| C4     | H7     | 0.94652032216        |
| H5     | H7     | 0.035751291339       |
| H6     | H7     | 0.033672962522       |

## PROPANAMIDE

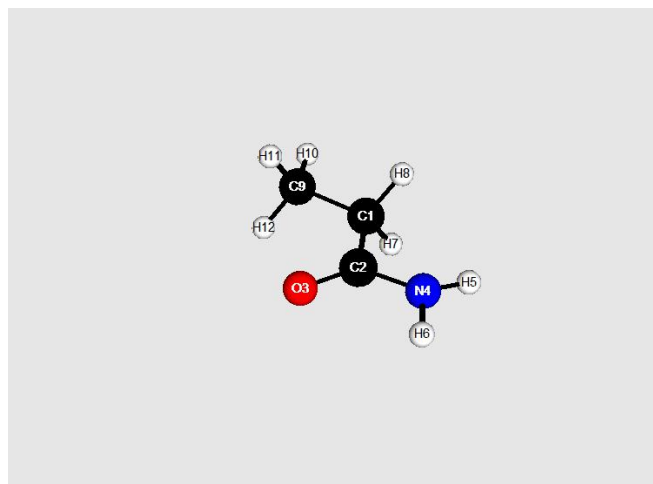

## HARTREE-FOCK

| Atom A | Atom B | Delocalization index |
|--------|--------|----------------------|
| C1     | C2     | 0.89525265736        |
| C1     | O3     | 0.10421502355        |
| C2     | O3     | 1.1066666856         |
| C1     | N4     | 0.086180200616       |
| C2     | N4     | 0.86759094791        |
| O3     | N4     | 0.2685540312         |
| C1     | H5     | 0.0052922484151      |
| C2     | H5     | 0.014080175737       |
| O3     | H5     | 0.015021925846       |
| N4     | H5     | 0.82500642109        |
| C1     | H6     | 0.0075988371636      |
| C2     | H6     | 0.014771674539       |
| O3     | H6     | 0.01205592796        |
| N4     | H6     | 0.80361955086        |
| H5     | H6     | 0.014989103092       |
| C1     | H7     | 0.94647229976        |
| C2     | H7     | 0.045484157452       |
| O3     | H7     | 0.014400009876       |
| N4     | H7     | 0.014368662922       |
| H5     | H7     | 0.0020182528951      |
| H6     | H7     | 0.00036882113479     |
| C1     | H8     | 0.94727633272        |
| C2     | H8     | 0.042309322608       |
| O3     | H8     | 0.014026902856       |
| N4     | H8     | 0.017196429238       |
| H5     | H8     | 0.0020246203236      |
| H6     | H8     | 0.00062328269686     |
| H7     | H8     | 0.041434146053       |
| C1     | C9     | 0.98138700569        |
| C2     | C9     | 0.032169892618       |

|     |     |                  |
|-----|-----|------------------|
| O3  | C9  | 0.034402919058   |
| N4  | C9  | 0.0091401212949  |
| H5  | C9  | 0.00077494000017 |
| H6  | C9  | 0.0013849150176  |
| H7  | C9  | 0.038905822186   |
| H8  | C9  | 0.038645687465   |
| C1  | C1  | 0.045905999909   |
| C2  | C1  | 0.0087017964978  |
| O3  | C1  | 0.0041208464156  |
| N4  | C1  | 0.0016769598461  |
| H5  | C1  | 5.6767880212e-05 |
| H6  | C1  | 0.00034172224763 |
| H7  | C1  | 0.0037442982882  |
| H8  | C1  | 0.003649510415   |
| C9  | C1  | 0.96712670336    |
| C1  | H11 | 0.042648133465   |
| C2  | H11 | 0.0033239714296  |
| O3  | H11 | 0.011973506732   |
| N4  | H11 | 0.00086641311157 |
| H5  | H11 | 0.00010028450021 |
| H6  | H11 | 4.6004393539e-05 |
| H7  | H11 | 0.010919335312   |
| H8  | H11 | 0.0033523157451  |
| C9  | H11 | 0.95895726803    |
| C1  | H11 | 0.041793911485   |
| C1  | H12 | 0.041857366189   |
| C2  | H12 | 0.0029924234043  |
| O3  | H12 | 0.015913353774   |
| N4  | H12 | 0.0008968726709  |
| H5  | H12 | 0.00012051453992 |
| H6  | H12 | 5.0235878737e-05 |
| H7  | H12 | 0.0033934923558  |
| H8  | H12 | 0.010730461182   |
| C9  | H12 | 0.95676165973    |
| C1  | H12 | 0.041254078137   |
| H11 | H12 | 0.040407606445   |

#### CCSD

| Atom A | Atom B | Delocalization index |
|--------|--------|----------------------|
| C1     | C2     | 0.78069968913        |
| C1     | O3     | 0.079743226616       |
| C2     | O3     | 1.0921866533         |
| C1     | N4     | 0.067376294355       |
| C2     | N4     | 0.86584974915        |
| O3     | N4     | 0.19294136089        |
| C1     | H5     | 0.0060732912137      |
| C2     | H5     | 0.014187026411       |
| O3     | H5     | 0.013987219691       |

|    |     |                  |
|----|-----|------------------|
| N4 | H5  | 0.738409882      |
| C1 | H6  | 0.0067579231918  |
| C2 | H6  | 0.014928621401   |
| O3 | H6  | 0.013961917972   |
| N4 | H6  | 0.72393600959    |
| H5 | H6  | 0.013836386544   |
| C1 | H7  | 0.81173413481    |
| C2 | H7  | 0.035670017264   |
| O3 | H7  | 0.011563556968   |
| N4 | H7  | 0.011290381509   |
| H5 | H7  | 0.0022441953377  |
| H6 | H7  | 0.00041412596188 |
| C1 | H8  | 0.81252671136    |
| C2 | H8  | 0.031908865905   |
| O3 | H8  | 0.01132972386    |
| N4 | H8  | 0.016084717155   |
| H5 | H8  | 0.0027843123722  |
| H6 | H8  | 0.00067136660556 |
| H7 | H8  | 0.03234662209    |
| C1 | C9  | 0.84426586342    |
| C2 | C9  | 0.027445646396   |
| O3 | C9  | 0.034483625584   |
| N4 | C9  | 0.0069278449296  |
| H5 | C9  | 0.00077103527478 |
| H6 | C9  | 0.0012650676583  |
| H7 | C9  | 0.03176115734    |
| H8 | C9  | 0.03146850187    |
| C1 | C1  | 0.036107676359   |
| C2 | C1  | 0.0068374271838  |
| O3 | C1  | 0.0036121730259  |
| N4 | C1  | 0.0013282990463  |
| H5 | C1  | 7.1799914661e-05 |
| H6 | C1  | 0.00036120015508 |
| H7 | C1  | 0.0033072215635  |
| H8 | C1  | 0.0031223591955  |
| C9 | C1  | 0.83201935609    |
| C1 | H11 | 0.033726695874   |
| C2 | H11 | 0.0035516089319  |
| O3 | H11 | 0.011712700223   |
| N4 | H11 | 0.00082930474818 |
| H5 | H11 | 0.00011953467311 |
| H6 | H11 | 6.587137382e-05  |
| H7 | H11 | 0.0087561362855  |
| H8 | H11 | 0.0029513103695  |
| C9 | H11 | 0.82409541338    |
| C1 | H11 | 0.032477369462   |
| C1 | H12 | 0.032705080695   |
| C2 | H12 | 0.0029787167389  |

|     |     |                  |
|-----|-----|------------------|
| O3  | H12 | 0.018873048825   |
| N4  | H12 | 0.00091027056844 |
| H5  | H12 | 0.00018834548193 |
| H6  | H12 | 8.0777219383e-05 |
| H7  | H12 | 0.0029233951154  |
| H8  | H12 | 0.0085721004841  |
| C9  | H12 | 0.82079322461    |
| C1  | H12 | 0.031793985329   |
| H11 | H12 | 0.031642604242   |



## ACETIC ACID

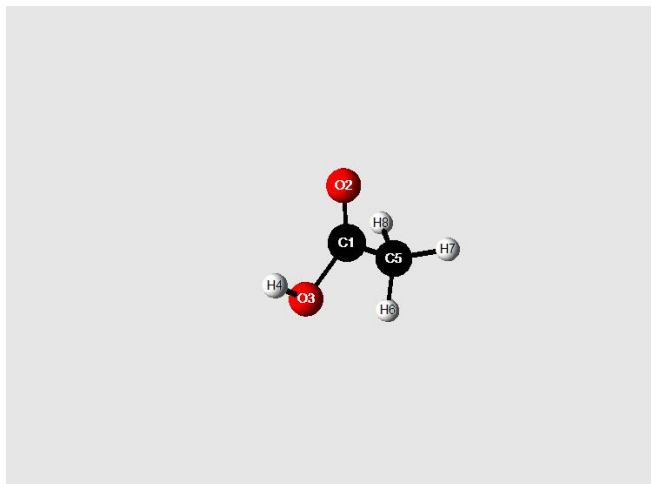

### HARTREE-FOCK

| Atom A | Atom B | Delocalization index |
|--------|--------|----------------------|
| C1     | O2     | 1.0950705796         |
| C1     | O3     | 0.71452440487        |
| O2     | O3     | 0.29967932757        |
| C1     | H4     | 0.008028202658       |
| O2     | H4     | 0.010906392892       |
| O3     | H4     | 0.54625184352        |
| C1     | C5     | 0.90741944738        |
| O2     | C5     | 0.10887855471        |
| O3     | C5     | 0.090019147777       |
| H4     | C5     | 0.0066720075387      |
| C1     | H6     | 0.034275302696       |
| O2     | H6     | 0.013585237433       |
| O3     | H6     | 0.020109545296       |
| H4     | H6     | 0.00055269640774     |
| C5     | H6     | 0.961381206          |
| C1     | H7     | 0.044854428042       |
| O2     | H7     | 0.017316059022       |
| O3     | H7     | 0.0084651822938      |
| H4     | H7     | 0.00066239380379     |
| C5     | H7     | 0.95508130997        |
| H6     | H7     | 0.036502467966       |
| C1     | H8     | 0.044874639169       |
| O2     | H8     | 0.017316426046       |
| O3     | H8     | 0.0084653172151      |
| H4     | H8     | 0.00066239207795     |
| C5     | H8     | 0.95493295786        |
| H6     | H8     | 0.036503156451       |
| H7     | H8     | 0.037605507383       |

## CCSD

| Atom A | Atom B | Delocalization index |
|--------|--------|----------------------|
| C1     | O2     | 1.0892991564         |
| C1     | O3     | 0.72857265615        |
| O2     | O3     | 0.22345110304        |
| C1     | H4     | 0.0093678748142      |
| O2     | H4     | 0.01638569563        |
| O3     | H4     | 0.55244566948        |
| C1     | C5     | 0.79558576662        |
| O2     | C5     | 0.084877837249       |
| O3     | C5     | 0.073682506959       |
| H4     | C5     | 0.0066732954071      |
| C1     | H6     | 0.025801809375       |
| O2     | H6     | 0.0111110834554      |
| O3     | H6     | 0.020274160824       |
| H4     | H6     | 0.00066784893183     |
| C5     | H6     | 0.82594108914        |
| C1     | H7     | 0.034763502929       |
| O2     | H7     | 0.014215836571       |
| O3     | H7     | 0.0067586282324      |
| H4     | H7     | 0.0007646533776      |
| C5     | H7     | 0.82188745972        |
| H6     | H7     | 0.028728822785       |
| C1     | H8     | 0.034775896347       |
| O2     | H8     | 0.014215751993       |
| O3     | H8     | 0.006758600862       |
| H4     | H8     | 0.00076464582305     |
| C5     | H8     | 0.82181717713        |
| H6     | H8     | 0.028728886376       |
| H7     | H8     | 0.029848469791       |

## FORMIC ANHYDRIDE

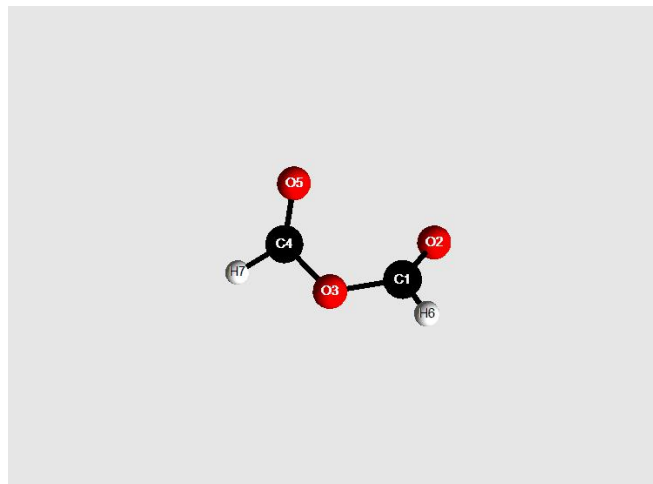

### HARTREE-FOCK

| Atom A | Atom B | Delocalization index |
|--------|--------|----------------------|
| C1     | O2     | 1.2085279016         |
| C1     | O3     | 0.68112506041        |
| O2     | O3     | 0.25502115136        |
| C1     | C4     | 0.011079062377       |
| O2     | C4     | 0.010392174683       |
| O3     | C4     | 0.68057840876        |
| C1     | O5     | 0.010399515258       |
| O2     | O5     | 0.051763474733       |
| O3     | O5     | 0.25506296437        |
| C4     | O5     | 1.2075456977         |
| C1     | H6     | 0.86284069153        |
| O2     | H6     | 0.10342305151        |
| O3     | H6     | 0.077306306976       |
| C4     | H6     | 0.0051665994072      |
| O5     | H6     | 0.0020484824657      |
| C1     | H7     | 0.0051732544537      |
| O2     | H7     | 0.0020493606743      |
| O3     | H7     | 0.077313292514       |
| C4     | H7     | 0.86279948094        |
| O5     | H7     | 0.10342008408        |
| H6     | H7     | 0.00222700343        |

## ACETIC ANHYDRIDE

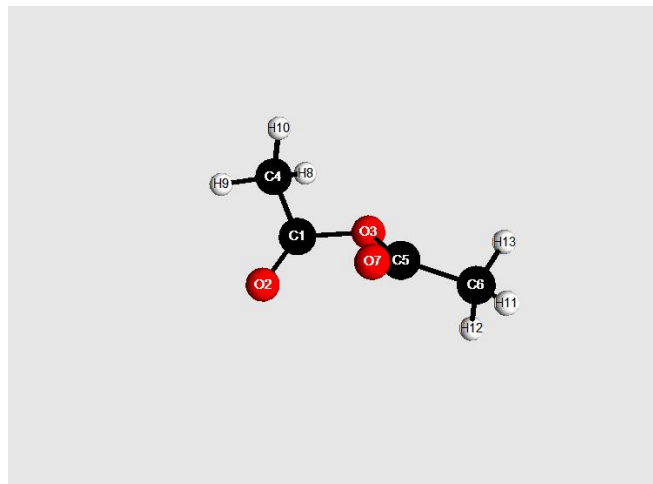

### HARTREE-FOCK

| Atom A | Atom B | Delocalization index |
|--------|--------|----------------------|
| C1     | O2     | 1.1621383999         |
| C1     | O3     | 0.65897039986        |
| O2     | O3     | 0.25247210448        |
| C1     | C4     | 0.91431314549        |
| O2     | C4     | 0.10617877868        |
| O3     | C4     | 0.089233099915       |
| C1     | C5     | 0.010259196454       |
| O2     | C5     | 0.010856572519       |
| O3     | C5     | 0.65862165717        |
| C4     | C5     | 0.0045250232998      |
| C1     | C6     | 0.0045248213545      |
| O2     | C6     | 0.0019623802299      |
| O3     | C6     | 0.089169276881       |
| C4     | C6     | 0.0015264582802      |
| C5     | C6     | 0.91404939063        |
| C1     | O7     | 0.010848152144       |
| O2     | O7     | 0.049642665745       |
| O3     | O7     | 0.25246941356        |
| C4     | O7     | 0.0019656554535      |
| C5     | O7     | 1.1619013813         |
| C6     | O7     | 0.10618365428        |
| C1     | H8     | 0.044422060165       |
| O2     | H8     | 0.016486314938       |
| O3     | H8     | 0.013545335838       |
| C4     | H8     | 0.95452121905        |
| C5     | H8     | 0.00031350011478     |
| C6     | H8     | 5.6337257914e-05     |
| O7     | H8     | 0.00042143436088     |
| C1     | H9     | 0.036564752213       |
| O2     | H9     | 0.016992690341       |

|     |     |                  |
|-----|-----|------------------|
| O3  | H9  | 0.010830798228   |
| C4  | H9  | 0.9579999373     |
| C5  | H9  | 0.00095292068207 |
| C6  | H9  | 0.00036631670038 |
| O7  | H9  | 0.00029869707657 |
| H8  | H9  | 0.035844585846   |
| C1  | C1  | 0.04616349173    |
| O2  | C1  | 0.016945673861   |
| O3  | C1  | 0.01131039224    |
| C4  | C1  | 0.9529094692     |
| C5  | C1  | 0.00024471107293 |
| C6  | C1  | 8.2941733194e-05 |
| O7  | C1  | 0.00067080381086 |
| H8  | C1  | 0.038387961784   |
| H9  | C1  | 0.035839948983   |
| C1  | H11 | 0.00095313903761 |
| O2  | H11 | 0.00029869686984 |
| O3  | H11 | 0.010830716462   |
| C4  | H11 | 0.00036635434406 |
| C5  | H11 | 0.036513429853   |
| C6  | H11 | 0.9580062295     |
| O7  | H11 | 0.016993114883   |
| H8  | H11 | 1.1033370106e-05 |
| H9  | H11 | 9.487138344e-05  |
| C1  | H11 | 1.4304496159e-05 |
| C1  | H12 | 0.00024475934231 |
| O2  | H12 | 0.00067066342371 |
| O3  | H12 | 0.011310645904   |
| C4  | H12 | 8.2995016396e-05 |
| C5  | H12 | 0.046134049652   |
| C6  | H12 | 0.95280518691    |
| O7  | H12 | 0.016945446317   |
| H8  | H12 | 1.043689603e-05  |
| H9  | H12 | 1.4306082183e-05 |
| C1  | H12 | 1.4978137162e-05 |
| H11 | H12 | 0.035839950699   |
| C1  | H13 | 0.00031377098168 |
| O2  | H13 | 0.00042144609883 |
| O3  | H13 | 0.013546099187   |
| C4  | H13 | 5.6422169183e-05 |
| C5  | H13 | 0.044368381787   |
| C6  | H13 | 0.95449182993    |
| O7  | H13 | 0.0164861888     |
| H8  | H13 | 8.9476463862e-06 |
| H9  | H13 | 1.1033819329e-05 |
| C1  | H13 | 1.0438755371e-05 |
| H11 | H13 | 0.035844607181   |
| H12 | H13 | 0.038387829887   |



## METHYL FORMIATE

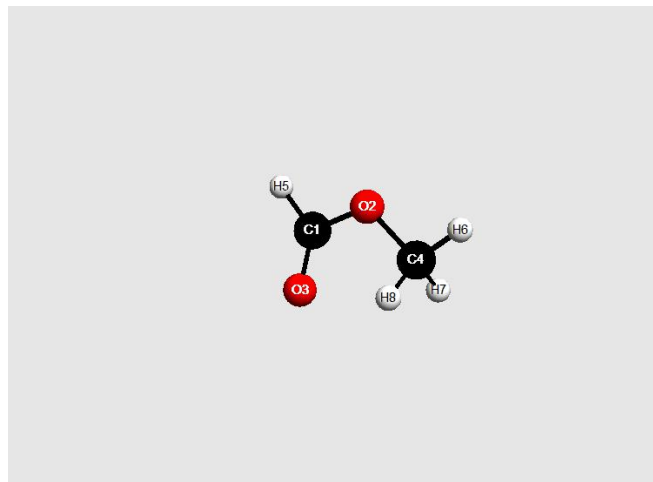

## HARTREE-FOCK

| Atom A | Atom B | Delocalization index |
|--------|--------|----------------------|
| C1     | O2     | 0.73955959978        |
| C1     | O3     | 1.1240510304         |
| O2     | O3     | 0.2801039275         |
| C1     | C4     | 0.015308136943       |
| O2     | C4     | 0.76291934299        |
| O3     | C4     | 0.037905894575       |
| C1     | H5     | 0.86001432572        |
| O2     | H5     | 0.08208982446        |
| O3     | H5     | 0.10504926042        |
| C4     | H5     | 0.0089628688714      |
| C1     | H6     | 0.004994332411       |
| O2     | H6     | 0.06931664577        |
| O3     | H6     | 0.0042994021716      |
| C4     | H6     | 0.93621667191        |
| H5     | H6     | 0.001146821169       |
| C1     | H7     | 0.0035455067595      |
| O2     | H7     | 0.070674322958       |
| O3     | H7     | 0.017790626742       |
| C4     | H7     | 0.92787883394        |
| H5     | H7     | 0.00079159388404     |
| H6     | H7     | 0.035349488095       |
| C1     | H8     | 0.0035665684411      |
| O2     | H8     | 0.070694944235       |
| O3     | H8     | 0.017790385465       |
| C4     | H8     | 0.92787273592        |
| H5     | H8     | 0.00079157686206     |
| H6     | H8     | 0.035349248122       |
| H7     | H8     | 0.03580266924        |

## CCSD

| Atom A | Atom B | Delocalization index |
|--------|--------|----------------------|
| C1     | O2     | 0.7543040968         |
| C1     | O3     | 1.1106471773         |
| O2     | O3     | 0.20389950314        |
| C1     | C4     | 0.016928465653       |
| O2     | C4     | 0.72526714779        |
| O3     | C4     | 0.041670422445       |
| C1     | H5     | 0.75127831559        |
| O2     | H5     | 0.063345553384       |
| O3     | H5     | 0.077437074902       |
| C4     | H5     | 0.0083385737069      |
| C1     | H6     | 0.0047974278445      |
| O2     | H6     | 0.052089833087       |
| O3     | H6     | 0.0040426011057      |
| C4     | H6     | 0.80905995982        |
| H5     | H6     | 0.0010989952948      |
| C1     | H7     | 0.0041672864511      |
| O2     | H7     | 0.052170697784       |
| O3     | H7     | 0.019855565634       |
| C4     | H7     | 0.79973686101        |
| H5     | H7     | 0.00086039044157     |
| H6     | H7     | 0.027673761654       |
| C1     | H8     | 0.0041642512649      |
| O2     | H8     | 0.05216614344        |
| O3     | H8     | 0.019854561674       |
| C4     | H8     | 0.79978359081        |
| H5     | H8     | 0.00086035467361     |
| H6     | H8     | 0.027673557141       |
| H7     | H8     | 0.02830604838        |



## ETHYL FORMAMIDE

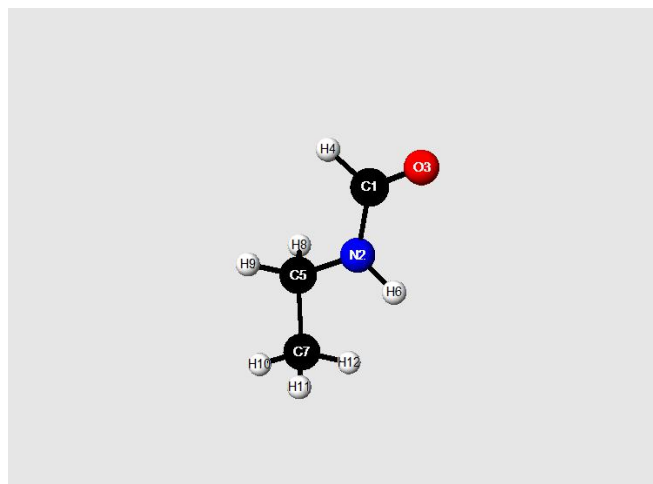

### HARTREE-FOCK

| Atom A | Atom B | Delocalization index |
|--------|--------|----------------------|
| C1     | N2     | 0.90095151699        |
| C1     | O3     | 1.1251043041         |
| N2     | O3     | 0.27587481213        |
| C1     | H4     | 0.8595366678         |
| N2     | H4     | 0.079374151498       |
| O3     | H4     | 0.11392421514        |
| C1     | C5     | 0.019475858648       |
| N2     | C5     | 0.87230703505        |
| O3     | C5     | 0.013833622699       |
| H4     | C5     | 0.0095300457424      |
| C1     | H6     | 0.014769678992       |
| N2     | H6     | 0.7964198315         |
| O3     | H6     | 0.012696376218       |
| H4     | H6     | 0.008964005565       |
| C5     | H6     | 0.01653206564        |
| C1     | C7     | 0.0051602553762      |
| N2     | C7     | 0.077255771016       |
| O3     | C7     | 0.0021311067426      |
| H4     | C7     | 0.0016392012262      |
| C5     | C7     | 0.9618338751         |
| H6     | C7     | 0.0076145832863      |
| C1     | H8     | 0.0049239543512      |
| N2     | H8     | 0.070356278075       |
| O3     | H8     | 0.0038650544082      |
| H4     | H8     | 0.0041180983748      |
| C5     | H8     | 0.92596898504        |
| H6     | H8     | 0.0033633134011      |
| C7     | H8     | 0.040092123886       |
| C1     | H9     | 0.0049241760129      |
| N2     | H9     | 0.070344437886       |

|     |     |                  |
|-----|-----|------------------|
| O3  | H9  | 0.0038649334123  |
| H4  | H9  | 0.004118674724   |
| C5  | H9  | 0.92600631609    |
| H6  | H9  | 0.0033636563596  |
| C7  | H9  | 0.040102716269   |
| H8  | H9  | 0.04011779791    |
| C1  | C1  | 0.0010176276324  |
| N2  | C1  | 0.012351291884   |
| O3  | C1  | 0.00067512515704 |
| H4  | C1  | 8.0396674404e-05 |
| C5  | C1  | 0.041939606477   |
| H6  | C1  | 0.00085950175732 |
| C7  | C1  | 0.96452413127    |
| H8  | C1  | 0.003693437467   |
| H9  | C1  | 0.0036934366992  |
| C1  | H11 | 0.00038755156479 |
| N2  | H11 | 0.011570420369   |
| O3  | H11 | 0.00041601924976 |
| H4  | H11 | 0.00025593964609 |
| C5  | H11 | 0.041296235404   |
| H6  | H11 | 0.002348140601   |
| C7  | H11 | 0.96155114319    |
| H8  | H11 | 0.010972305266   |
| H9  | H11 | 0.0037951958259  |
| C1  | H11 | 0.041298914984   |
| C1  | H12 | 0.00038758757723 |
| N2  | H12 | 0.011574147738   |
| O3  | H12 | 0.00041598697431 |
| H4  | H12 | 0.0002559586301  |
| C5  | H12 | 0.041424587132   |
| H6  | H12 | 0.0023482549392  |
| C7  | H12 | 0.9614920843     |
| H8  | H12 | 0.0037952140008  |
| H9  | H12 | 0.010972233954   |
| C1  | H12 | 0.041298858273   |
| H11 | H12 | 0.042192787039   |

## PROPANOIC ACID

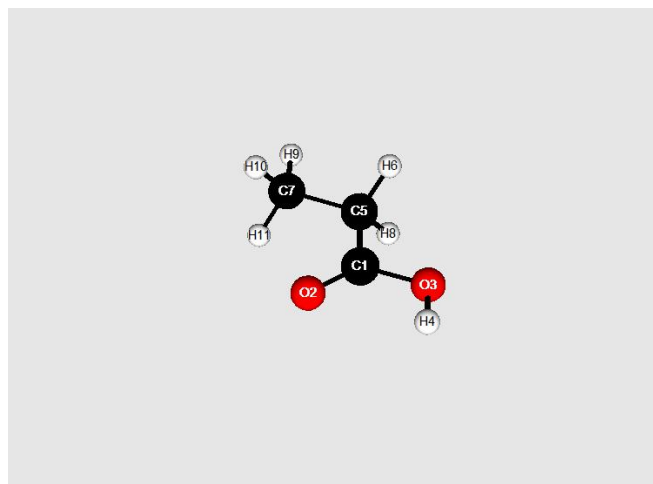

## HARTREE-FOCK

| Atom A | Atom B | Delocalization index |
|--------|--------|----------------------|
| C1     | O2     | 1.0972280704         |
| C1     | O3     | 0.70711268004        |
| O2     | O3     | 0.29621181655        |
| C1     | H4     | 0.0081797773768      |
| O2     | H4     | 0.010827911959       |
| O3     | H4     | 0.54687890879        |
| C1     | C5     | 0.89738950188        |
| O2     | C5     | 0.097462862653       |
| O3     | C5     | 0.090130183975       |
| H4     | C5     | 0.0063100489636      |
| C1     | H6     | 0.046368592719       |
| O2     | H6     | 0.014546462827       |
| O3     | H6     | 0.014999032882       |
| H4     | H6     | 0.00027442189316     |
| C5     | H6     | 0.94121700049        |
| C1     | C7     | 0.034590257665       |
| O2     | C7     | 0.031185127417       |
| O3     | C7     | 0.0097575811863      |
| H4     | C7     | 0.0011231023197      |
| C5     | C7     | 0.98306007583        |
| H6     | C7     | 0.037044020498       |
| C1     | H8     | 0.046319212419       |
| O2     | H8     | 0.014543490318       |
| O3     | H8     | 0.014997513265       |
| H4     | H8     | 0.00027450921186     |
| C5     | H8     | 0.94118664983        |
| H6     | H8     | 0.038872825203       |
| C7     | H8     | 0.037043764188       |
| C1     | H9     | 0.008761368689       |
| O2     | H9     | 0.0037548343578      |

|    |     |                  |
|----|-----|------------------|
| O3 | H9  | 0.0017050544693  |
| H4 | H9  | 0.00026668524893 |
| C5 | H9  | 0.045346684993   |
| H6 | H9  | 0.0034909678415  |
| C7 | H9  | 0.9667400517     |
| H8 | H9  | 0.0034915318166  |
| C1 | C1  | 0.0032959201659  |
| O2 | C1  | 0.012175688367   |
| O3 | C1  | 0.00089958476828 |
| H4 | C1  | 3.2644041842e-05 |
| C5 | C1  | 0.042575228104   |
| H6 | C1  | 0.0032258920956  |
| C7 | C1  | 0.95906610186    |
| H8 | C1  | 0.010658902248   |
| H9 | C1  | 0.041375609307   |
| C1 | H11 | 0.0032991298962  |
| O2 | H11 | 0.012170003641   |
| O3 | H11 | 0.0008995139354  |
| H4 | H11 | 3.2634337714e-05 |
| C5 | H11 | 0.042592659954   |
| H6 | H11 | 0.010659956108   |
| C7 | H11 | 0.95912197303    |
| H8 | H11 | 0.0032247903397  |
| H9 | H11 | 0.041377410645   |
| C1 | H11 | 0.040723212717   |

## ACETOPHENONE

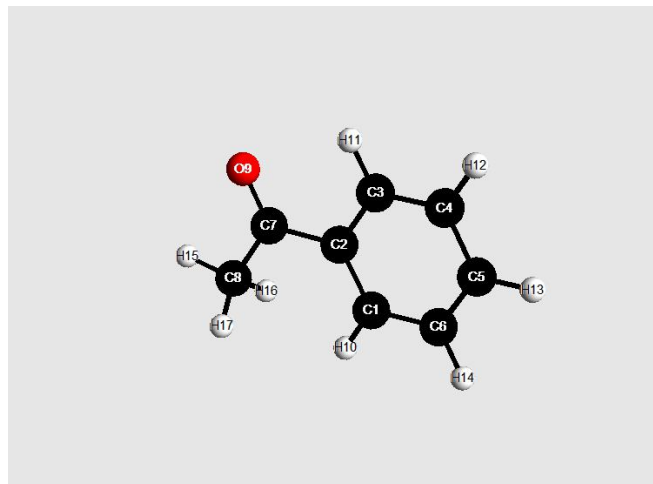

## HARTREE-FOCK

| Atom A | Atom B | Delocalization index |
|--------|--------|----------------------|
| C1     | C2     | 1.3695517434         |
| C1     | C3     | 0.070750159853       |
| C2     | C3     | 1.3384949028         |
| C1     | C4     | 0.094607720813       |
| C2     | C4     | 0.072988760725       |
| C3     | C4     | 1.4064037399         |
| C1     | C5     | 0.076014902669       |
| C2     | C5     | 0.093623500053       |
| C3     | C5     | 0.076000915579       |
| C4     | C5     | 1.371356792          |
| C1     | C6     | 1.3815010287         |
| C2     | C6     | 0.070705260497       |
| C3     | C6     | 0.09638704267        |
| C4     | C6     | 0.072617975216       |
| C5     | C6     | 1.3943184201         |
| C1     | C7     | 0.051441143548       |
| C2     | C7     | 0.95810097405        |
| C3     | C7     | 0.047799125225       |
| C4     | C7     | 0.0077679249331      |
| C5     | C7     | 0.0087036016116      |
| C6     | C7     | 0.0074957913206      |
| C1     | C8     | 0.015182547534       |
| C2     | C8     | 0.046801668449       |
| C3     | C8     | 0.0059261446669      |
| C4     | C8     | 0.001353486768       |
| C5     | C8     | 0.00093692608314     |
| C6     | C8     | 0.0012749110237      |
| C7     | C8     | 0.93204026918        |
| C1     | O9     | 0.024745120523       |
| C2     | O9     | 0.12479669128        |

|     |     |                  |
|-----|-----|------------------|
| C3  | O9  | 0.046167494704   |
| C4  | O9  | 0.0040280943285  |
| C5  | O9  | 0.010114492012   |
| C6  | O9  | 0.0041238350067  |
| C7  | O9  | 1.2589944622     |
| C8  | O9  | 0.12316355431    |
| C1  | C1  | 0.9617675589     |
| C2  | C1  | 0.045469388117   |
| C3  | C1  | 0.0084314593861  |
| C4  | C1  | 0.0057176984474  |
| C5  | C1  | 0.0080144278787  |
| C6  | C1  | 0.047284383982   |
| C7  | C1  | 0.0054466977702  |
| C8  | C1  | 0.01690770325    |
| O9  | C1  | 0.0014868735667  |
| C1  | H11 | 0.0077669683633  |
| C2  | H11 | 0.041252185532   |
| C3  | H11 | 0.95008295448    |
| C4  | H11 | 0.044475380623   |
| C5  | H11 | 0.0077432201598  |
| C6  | H11 | 0.0050489856088  |
| C7  | H11 | 0.0052038729633  |
| C8  | H11 | 0.00083558066815 |
| O9  | H11 | 0.031585263424   |
| C1  | H11 | 0.0014442025395  |
| C1  | H12 | 0.005766714852   |
| C2  | H12 | 0.0086199696747  |
| C3  | H12 | 0.049642844115   |
| C4  | H12 | 0.97531840182    |
| C5  | H12 | 0.048479207079   |
| C6  | H12 | 0.0084151630262  |
| C7  | H12 | 0.0011154098866  |
| C8  | H12 | 0.00033109736159 |
| O9  | H12 | 0.00019374288587 |
| C1  | H12 | 0.00036678625026 |
| H11 | H12 | 0.0054134800704  |
| C1  | H13 | 0.0085606012258  |
| C2  | H13 | 0.005708435826   |
| C3  | H13 | 0.008371760359   |
| C4  | H13 | 0.047473925756   |
| C5  | H13 | 0.97453586741    |
| C6  | H13 | 0.048697454916   |
| C7  | H13 | 0.00048117800348 |
| C8  | H13 | 8.9016334934e-05 |
| O9  | H13 | 0.0007337173172  |
| C1  | H13 | 0.0012389530321  |
| H11 | H13 | 0.0012074071145  |
| H12 | H13 | 0.0054638542688  |

|     |     |                  |
|-----|-----|------------------|
| C1  | H14 | 0.04938437355    |
| C2  | H14 | 0.0085011010886  |
| C3  | H14 | 0.0060245720186  |
| C4  | H14 | 0.0085384835968  |
| C5  | H14 | 0.049262769512   |
| C6  | H14 | 0.97622018502    |
| C7  | H14 | 0.0010615985885  |
| C8  | H14 | 4.2454888892e-05 |
| O9  | H14 | 0.00057132271709 |
| C1  | H14 | 0.0057422343323  |
| H11 | H14 | 0.00032896991601 |
| H12 | H14 | 0.0013631236397  |
| H13 | H14 | 0.0055780051084  |
| C1  | H15 | 0.0018548332438  |
| C2  | H15 | 0.0073314405706  |
| C3  | H15 | 0.0010720279495  |
| C4  | H15 | 0.00026817704304 |
| C5  | H15 | 0.00011235471299 |
| C6  | H15 | 0.00012937826761 |
| C7  | H15 | 0.035491697831   |
| C8  | H15 | 0.95557607897    |
| O9  | H15 | 0.023512494081   |
| C1  | H15 | 0.0021564046868  |
| H11 | H15 | 8.3401591984e-05 |
| H12 | H15 | 6.3915788435e-05 |
| H13 | H15 | 1.3265318495e-05 |
| H14 | H15 | 1.2460621575e-05 |
| C1  | H16 | 0.0074692464901  |
| C2  | H16 | 0.0049444982027  |
| C3  | H16 | 0.00064152710983 |
| C4  | H16 | 0.0004325897587  |
| C5  | H16 | 0.00049693305441 |
| C6  | H16 | 0.00074524899144 |
| C7  | H16 | 0.044165430694   |
| C8  | H16 | 0.9568050514     |
| O9  | H16 | 0.017935973986   |
| C1  | H16 | 0.0089745140876  |
| H11 | H16 | 9.1926816059e-05 |
| H12 | H16 | 3.1368475109e-05 |
| H13 | H16 | 4.6187997771e-05 |
| H14 | H16 | 2.8897381101e-05 |
| H15 | H16 | 0.037112554665   |
| C1  | H17 | 0.0074804778462  |
| C2  | H17 | 0.0049515524384  |
| C3  | H17 | 0.00064122008668 |
| C4  | H17 | 0.00043255989314 |
| C5  | H17 | 0.00049678965745 |
| C6  | H17 | 0.00074511909004 |

|     |     |                  |
|-----|-----|------------------|
| C7  | H17 | 0.044156507674   |
| C8  | H17 | 0.95695288707    |
| O9  | H17 | 0.017932609652   |
| C1  | H17 | 0.0089485301661  |
| H11 | H17 | 9.2017579796e-05 |
| H12 | H17 | 3.1366175111e-05 |
| H13 | H17 | 4.6173369596e-05 |
| H14 | H17 | 2.8890931912e-05 |
| H15 | H17 | 0.037112661311   |
| H16 | H17 | 0.040793065483   |



## FORMIC ACID

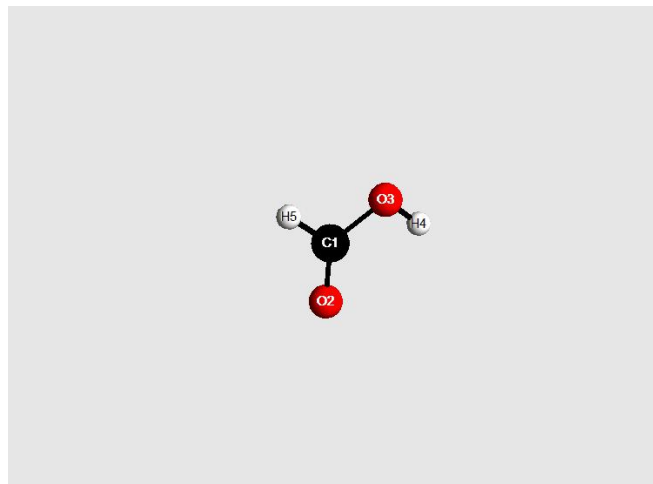

### HARTREE-FOCK

| Atom A | Atom B | Delocalization index |
|--------|--------|----------------------|
| C1     | O2     | 1.1368450354         |
| C1     | O3     | 0.73306972809        |
| O2     | O3     | 0.30261164004        |
| C1     | H4     | 0.0084616455147      |
| O2     | H4     | 0.010100723613       |
| O3     | H4     | 0.54356995525        |
| C1     | H5     | 0.86062857296        |
| O2     | H5     | 0.10467500885        |
| O3     | H5     | 0.081589344706       |
| H4     | H5     | 0.0074425477966      |

### CCSD

| Atom A | Atom B | Delocalization index |
|--------|--------|----------------------|
| C1     | O2     | 1.1247838705         |
| C1     | O3     | 0.74846256593        |
| O2     | O3     | 0.22574926579        |
| C1     | H4     | 0.010048746746       |
| O2     | H4     | 0.015241665017       |
| O3     | H4     | 0.55090974273        |
| C1     | H5     | 0.75160209511        |
| O2     | H5     | 0.077967447808       |
| O3     | H5     | 0.063589817547       |
| H4     | H5     | 0.0077141576969      |

## FORMAMIDE

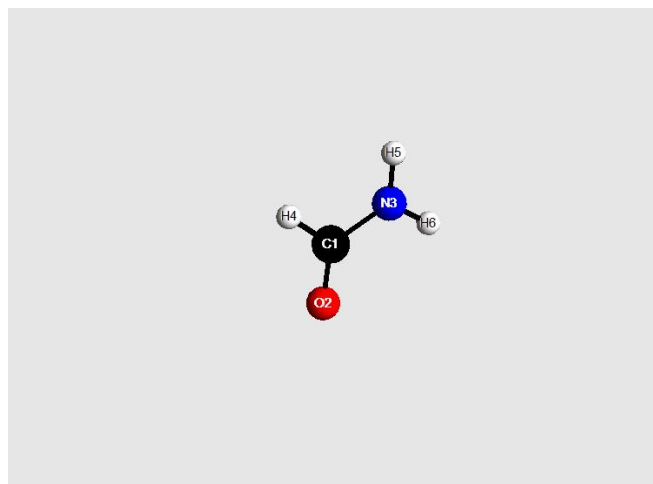

### HARTREE-FOCK

| Atom A | Atom B | Delocalization index |
|--------|--------|----------------------|
| C1     | O2     | 1.1330683276         |
| C1     | N3     | 0.8929516223         |
| O2     | N3     | 0.28065351101        |
| C1     | H4     | 0.86456723654        |
| O2     | H4     | 0.1138840505         |
| N3     | H4     | 0.084732024019       |
| C1     | H5     | 0.014317853171       |
| O2     | H5     | 0.014576146589       |
| N3     | H5     | 0.81498560359        |
| H4     | H5     | 0.002298504346       |
| C1     | H6     | 0.014856382046       |
| O2     | H6     | 0.011051724874       |
| N3     | H6     | 0.79503395514        |
| H4     | H6     | 0.0091662358553      |
| H5     | H6     | 0.014899172419       |

### CCSD

| Atom A | Atom B | Delocalization index |
|--------|--------|----------------------|
| C1     | O2     | 1.117896175          |
| C1     | N3     | 0.89042515136        |
| O2     | N3     | 0.204622521          |
| C1     | H4     | 0.7552534709         |
| O2     | H4     | 0.085684786391       |
| N3     | H4     | 0.063744270885       |
| C1     | H5     | 0.014367176307       |
| O2     | H5     | 0.014167836467       |
| N3     | H5     | 0.73256704229        |
| H4     | H5     | 0.0028203338732      |
| C1     | H6     | 0.014856566836       |
| O2     | H6     | 0.012758900852       |

|    |    |                |
|----|----|----------------|
| N3 | H6 | 0.71756693657  |
| H4 | H6 | 0.008485049793 |
| H5 | H6 | 0.013701407513 |

## METHYL PROPANOATE

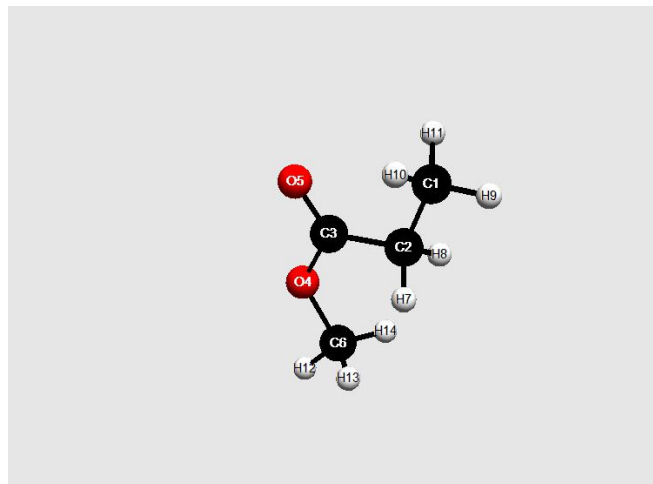

### HARTREE-FOCK

| Atom A | Atom B | Delocalization index |
|--------|--------|----------------------|
| C1     | C2     | 0.97955223845        |
| C1     | C3     | 0.032736957802       |
| C2     | C3     | 0.8938043631         |
| C1     | O4     | 0.0093985215954      |
| C2     | O4     | 0.082470285729       |
| C3     | O4     | 0.70224423235        |
| C1     | O5     | 0.036695924708       |
| C2     | O5     | 0.10511021795        |
| C3     | O5     | 1.1105370389         |
| O4     | O5     | 0.28045617789        |
| C1     | C6     | 0.0019761809807      |
| C2     | C6     | 0.01545439616        |
| C3     | C6     | 0.013502070337       |
| O4     | C6     | 0.77777596096        |
| O5     | C6     | 0.013844852234       |
| C1     | H7     | 0.037295972419       |
| C2     | H7     | 0.93808165585        |
| C3     | H7     | 0.044379369737       |
| O4     | H7     | 0.0082929691636      |
| O5     | H7     | 0.015147343606       |
| C6     | H7     | 0.010236682472       |
| C1     | H8     | 0.037284568844       |
| C2     | H8     | 0.93809736255        |
| C3     | H8     | 0.04433640684        |
| O4     | H8     | 0.0082786842314      |
| O5     | H8     | 0.015144821798       |
| C6     | H8     | 0.010265962345       |
| H7     | H8     | 0.040108165621       |
| C1     | H9     | 0.96676552402        |
| C2     | H9     | 0.045969350447       |

|     |     |                  |
|-----|-----|------------------|
| C3  | H9  | 0.0085541338439  |
| O4  | H9  | 0.0021151206612  |
| O5  | H9  | 0.0043382390556  |
| C6  | H9  | 8.6771438722e-05 |
| H7  | H9  | 0.0036535777573  |
| H8  | H9  | 0.0036706467425  |
| C1  | C1  | 0.95722430609    |
| C2  | C1  | 0.042249230605   |
| C3  | C1  | 0.0032610498247  |
| O4  | C1  | 0.0007108399374  |
| O5  | C1  | 0.014388070542   |
| C6  | C1  | 0.00024701563384 |
| H7  | C1  | 0.0032780802597  |
| H8  | C1  | 0.010370897749   |
| H9  | C1  | 0.041073021145   |
| C1  | H11 | 0.95711375214    |
| C2  | H11 | 0.042248142984   |
| C3  | H11 | 0.0032877527334  |
| O4  | H11 | 0.00071201604903 |
| O5  | H11 | 0.014452290702   |
| C6  | H11 | 0.00024667202182 |
| H7  | H11 | 0.010372627721   |
| H8  | H11 | 0.0032628956081  |
| H9  | H11 | 0.041065504293   |
| C1  | H11 | 0.04000232867    |
| C1  | H12 | 0.00027060971195 |
| C2  | H12 | 0.0022021296495  |
| C3  | H12 | 0.0049893173039  |
| O4  | H12 | 0.070452788261   |
| O5  | H12 | 0.0019675603293  |
| C6  | H12 | 0.92949381013    |
| H7  | H12 | 0.0011647006755  |
| H8  | H12 | 0.0011696131835  |
| H9  | H12 | 2.3234919851e-05 |
| C1  | H12 | 4.5195918416e-05 |
| H11 | H12 | 4.5130961598e-05 |
| C1  | H13 | 0.0010008594345  |
| C2  | H13 | 0.0092058374661  |
| C3  | H13 | 0.0026048936399  |
| O4  | H13 | 0.074306716052   |
| O5  | H13 | 0.0026260512119  |
| C6  | H13 | 0.92609932697    |
| H7  | H13 | 0.014017261713   |
| H8  | H13 | 0.0010596889406  |
| H9  | H13 | 3.4039869732e-05 |
| C1  | H13 | 4.6126707827e-05 |
| H11 | H13 | 0.00031553036717 |
| H12 | H13 | 0.036287459728   |

|     |     |                  |
|-----|-----|------------------|
| C1  | H14 | 0.00099791204156 |
| C2  | H14 | 0.0091982024485  |
| C3  | H14 | 0.0026009589164  |
| O4  | H14 | 0.07430787973    |
| O5  | H14 | 0.0026286711761  |
| C6  | H14 | 0.92615088693    |
| H7  | H14 | 0.0010513885411  |
| H8  | H14 | 0.014022945783   |
| H9  | H14 | 3.3977264077e-05 |
| C1  | H14 | 0.00031552369317 |
| H11 | H14 | 4.5942854633e-05 |
| H12 | H14 | 0.036288836762   |
| H13 | H14 | 0.038950405082   |

## ACETYL CHLORIDE

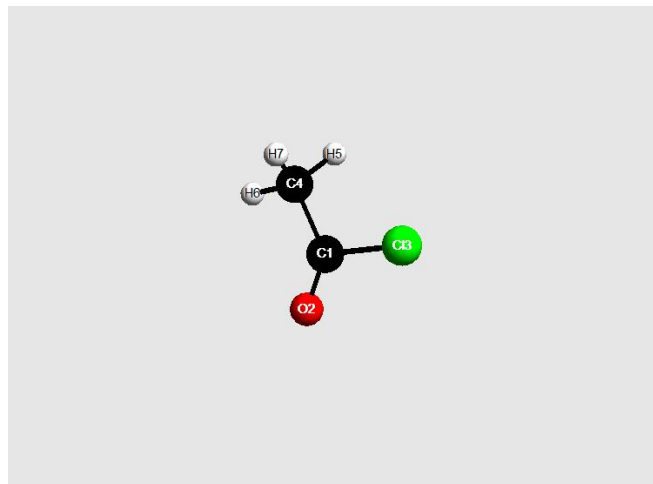

## HARTREE-FOCK

| Atom A | Atom B | Delocalization index |
|--------|--------|----------------------|
| C1     | O2     | 1.2900694627         |
| C1     | Cl3    | 0.91620828457        |
| O2     | Cl3    | 0.24417070836        |
| C1     | C4     | 0.92798430874        |
| O2     | C4     | 0.10210899207        |
| Cl3    | C4     | 0.095613208744       |
| C1     | H5     | 0.048625127176       |
| O2     | H5     | 0.016909069143       |
| Cl3    | H5     | 0.017187850997       |
| C4     | H5     | 0.94807751644        |
| C1     | H6     | 0.039024262691       |
| O2     | H6     | 0.016786446287       |
| Cl3    | H6     | 0.016544376486       |
| C4     | H6     | 0.95344546511        |
| H5     | H6     | 0.034194055202       |
| C1     | H7     | 0.048667693664       |
| O2     | H7     | 0.016928806465       |
| Cl3    | H7     | 0.017125138419       |
| C4     | H7     | 0.94803857708        |
| H5     | H7     | 0.036381688684       |
| H6     | H7     | 0.034200960395       |

## PHENYL ACETAMIDE

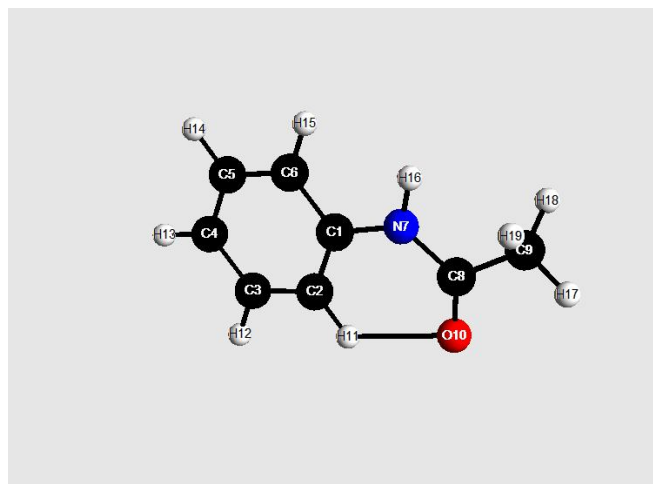

## HARTREE-FOCK

| Atom A | Atom B | Delocalization index |
|--------|--------|----------------------|
| C1     | C2     | 1.3276502746         |
| C1     | C3     | 0.079205162172       |
| C2     | C3     | 1.3827123058         |
| C1     | C4     | 0.087118327792       |
| C2     | C4     | 0.07085283686        |
| C3     | C4     | 1.3926624079         |
| C1     | C5     | 0.072159933095       |
| C2     | C5     | 0.094710740537       |
| C3     | C5     | 0.077318589977       |
| C4     | C5     | 1.3771240355         |
| C1     | C6     | 1.3101021034         |
| C2     | C6     | 0.063130464193       |
| C3     | C6     | 0.097000635968       |
| C4     | C6     | 0.07310148671        |
| C5     | C6     | 1.4013390684         |
| C1     | N7     | 0.91691017823        |
| C2     | N7     | 0.083908138529       |
| C3     | N7     | 0.011834493308       |
| C4     | N7     | 0.016846163885       |
| C5     | N7     | 0.01266446228        |
| C6     | N7     | 0.10145129686        |
| C1     | C8     | 0.016736888297       |
| C2     | C8     | 0.0065180180709      |
| C3     | C8     | 0.00052847282064     |
| C4     | C8     | 0.0029805012886      |
| C5     | C8     | 0.0012771002049      |
| C6     | C8     | 0.0085902713629      |
| N7     | C8     | 0.86344529335        |
| C1     | C9     | 0.0064552620739      |
| C2     | C9     | 0.001092631413       |



|     |     |                  |
|-----|-----|------------------|
| C3  | C9  | 0.00020753575833 |
| C4  | C9  | 0.00035590764799 |
| C5  | C9  | 0.00027280096492 |
| C6  | C9  | 0.0013956358533  |
| N7  | C9  | 0.091017419879   |
| C8  | C9  | 0.90418636704    |
| C1  | C1  | 0.011511089352   |
| C2  | C1  | 0.038435958152   |
| C3  | C1  | 0.0033954867241  |
| C4  | C1  | 0.0034473840822  |
| C5  | C1  | 0.0013050188538  |
| C6  | C1  | 0.004977285596   |
| N7  | C1  | 0.24345342297    |
| C8  | C1  | 1.1163166736     |
| C9  | C1  | 0.113491054      |
| C1  | H11 | 0.043434623673   |
| C2  | H11 | 0.94026704351    |
| C3  | H11 | 0.041397722945   |
| C4  | H11 | 0.0072064967354  |
| C5  | H11 | 0.0048331387014  |
| C6  | H11 | 0.0066956221681  |
| N7  | H11 | 0.0060478171996  |
| C8  | H11 | 0.0011092524635  |
| C9  | H11 | 0.00063007107677 |
| C1  | H11 | 0.050009038044   |
| C1  | H12 | 0.0086109814521  |
| C2  | H12 | 0.049080809275   |
| C3  | H12 | 0.97445213317    |
| C4  | H12 | 0.04887939454    |
| C5  | H12 | 0.0087923630336  |
| C6  | H12 | 0.006075834167   |
| N7  | H12 | 0.001394997793   |
| C8  | H12 | 2.5254093138e-05 |
| C9  | H12 | 1.7882605661e-05 |
| C1  | H12 | 0.00018628742825 |
| H11 | H12 | 0.0055438114131  |
| C1  | H13 | 0.0056876665916  |
| C2  | H13 | 0.008692362597   |
| C3  | H13 | 0.049615911021   |
| C4  | H13 | 0.9790009722     |
| C5  | H13 | 0.049449443134   |
| C6  | H13 | 0.0088162965517  |
| N7  | H13 | 0.0013534243748  |
| C8  | H13 | 0.00019921601736 |
| C9  | H13 | 2.8905524995e-05 |
| C1  | H13 | 0.00034336642735 |
| H11 | H13 | 0.0010682199502  |
| H12 | H13 | 0.0056233655622  |

|     |     |                  |
|-----|-----|------------------|
| C1  | H14 | 0.0085159157595  |
| C2  | H14 | 0.0060970075529  |
| C3  | H14 | 0.0087013189857  |
| C4  | H14 | 0.047744300596   |
| C5  | H14 | 0.97535413824    |
| C6  | H14 | 0.050568863702   |
| N7  | H14 | 0.0014108746691  |
| C8  | H14 | 0.00016447367637 |
| C9  | H14 | 6.3119821758e-05 |
| C1  | H14 | 7.1215199944e-05 |
| H11 | H14 | 0.000305641965   |
| H12 | H14 | 0.0014707280322  |
| H13 | H14 | 0.0055040137739  |
| C1  | H15 | 0.048370302463   |
| C2  | H15 | 0.0073326772446  |
| C3  | H15 | 0.0065194182488  |
| C4  | H15 | 0.0086218261019  |
| C5  | H15 | 0.049748267007   |
| C6  | H15 | 0.97293300611    |
| N7  | H15 | 0.016475668338   |
| C8  | H15 | 0.00055448569114 |
| C9  | H15 | 7.7335177543e-05 |
| C1  | H15 | 0.00063019942124 |
| H11 | H15 | 0.0015535159393  |
| H12 | H15 | 0.00039910409841 |
| H13 | H15 | 0.0013406227417  |
| H14 | H15 | 0.00613857782    |
| C1  | H16 | 0.016043878484   |
| C2  | H16 | 0.0055803137151  |
| C3  | H16 | 0.00093906513046 |
| C4  | H16 | 0.00043164521768 |
| C5  | H16 | 0.0007065647878  |
| C6  | H16 | 0.0082533385133  |
| N7  | H16 | 0.81037433562    |
| C8  | H16 | 0.013861045773   |
| C9  | H16 | 0.0080899895013  |
| C1  | H16 | 0.011607480101   |
| H11 | H16 | 0.00015181767102 |
| H12 | H16 | 0.00023189609977 |
| H13 | H16 | 6.2704510874e-05 |
| H14 | H16 | 5.3369576307e-05 |
| H15 | H16 | 0.0076184971079  |
| C1  | H17 | 0.0013580624926  |
| C2  | H17 | 0.00011765955126 |
| C3  | H17 | 2.9516074561e-05 |
| C4  | H17 | 3.2291013997e-05 |
| C5  | H17 | 5.3359425619e-05 |
| C6  | H17 | 0.00019886655215 |

|     |     |                  |
|-----|-----|------------------|
| N7  | H17 | 0.010008414238   |
| C8  | H17 | 0.0332172294     |
| C9  | H17 | 0.95572799532    |
| C1  | H17 | 0.021247859666   |
| H11 | H17 | 6.2624478279e-05 |
| H12 | H17 | 6.3840499538e-06 |
| H13 | H17 | 2.7054694127e-06 |
| H14 | H17 | 1.3548157492e-05 |
| H15 | H17 | 1.6406277257e-05 |
| H16 | H17 | 0.0011620747759  |
| C1  | H18 | 0.00044946885139 |
| C2  | H18 | 0.00045743425828 |
| C3  | H18 | 5.2746979032e-05 |
| C4  | H18 | 0.00022182882431 |
| C5  | H18 | 4.4212739465e-05 |
| C6  | H18 | 0.00032744900706 |
| N7  | H18 | 0.013733131213   |
| C8  | H18 | 0.041703346555   |
| C9  | H18 | 0.96166121624    |
| C1  | H18 | 0.015220512738   |
| H11 | H18 | 8.5352893575e-05 |
| H12 | H18 | 5.5406014026e-06 |
| H13 | H18 | 1.5481772469e-05 |
| H14 | H18 | 3.5022795074e-06 |
| H15 | H18 | 1.9453512841e-05 |
| H16 | H18 | 0.0025267837622  |
| H17 | H18 | 0.037370574015   |
| C1  | H19 | 0.00044703033832 |
| C2  | H19 | 0.00045922579241 |
| C3  | H19 | 5.2818435142e-05 |
| C4  | H19 | 0.0002242377086  |
| C5  | H19 | 4.4603225984e-05 |
| C6  | H19 | 0.00033054751552 |
| N7  | H19 | 0.013682654415   |
| C8  | H19 | 0.041782177345   |
| C9  | H19 | 0.96161176738    |
| C1  | H19 | 0.015223340151   |
| H11 | H19 | 8.4690143126e-05 |
| H12 | H19 | 5.4316138674e-06 |
| H13 | H19 | 1.5642163704e-05 |
| H14 | H19 | 3.5205057183e-06 |
| H15 | H19 | 1.9315884854e-05 |
| H16 | H19 | 0.0024604048591  |
| H17 | H19 | 0.037366830249   |
| H18 | H19 | 0.041215236875   |

## METHYL ACETATE

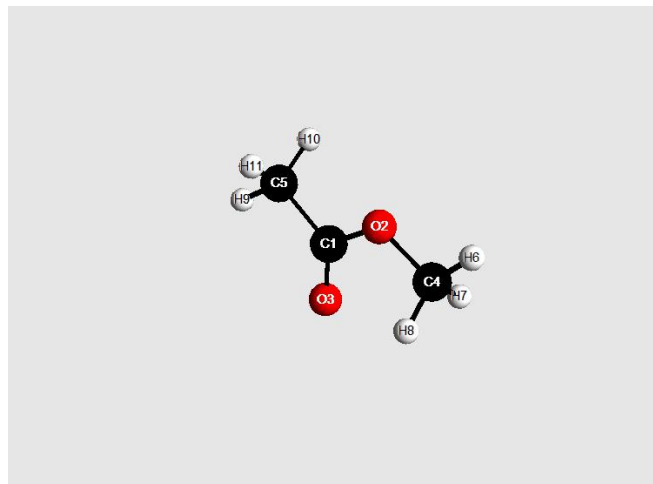

### HARTREE-FOCK

| Atom A | Atom B | Delocalization index |
|--------|--------|----------------------|
| C1     | O2     | 0.71477920489        |
| C1     | O3     | 1.0929884568         |
| O2     | O3     | 0.27235653662        |
| C1     | C4     | 0.014670590049       |
| O2     | C4     | 0.7635485525         |
| O3     | C4     | 0.039716581533       |
| C1     | C5     | 0.90623457665        |
| O2     | C5     | 0.093472870122       |
| O3     | C5     | 0.10774903002        |
| C4     | C5     | 0.0077697921796      |
| C1     | H6     | 0.005167026357       |
| O2     | H6     | 0.070282817412       |
| O3     | H6     | 0.0045220704037      |
| C4     | H6     | 0.93591785105        |
| C5     | H6     | 0.00099459967863     |
| C1     | H7     | 0.0032622089199      |
| O2     | H7     | 0.071039476333       |
| O3     | H7     | 0.018982956855       |
| C4     | H7     | 0.92708726279        |
| C5     | H7     | 0.00080569172522     |
| H6     | H7     | 0.035820654342       |
| C1     | H8     | 0.0032600846319      |
| O2     | H8     | 0.071040400791       |
| O3     | H8     | 0.018982992627       |
| C4     | H8     | 0.92708781425        |
| C5     | H8     | 0.00080578227702     |
| H6     | H8     | 0.035820468029       |
| H7     | H8     | 0.036200575025       |
| C1     | H9     | 0.035214707419       |
| O2     | H9     | 0.01051147167        |

|    |     |                  |
|----|-----|------------------|
| O3 | H9  | 0.018126889022   |
| C4 | H9  | 0.0015498992233  |
| C5 | H9  | 0.95953683385    |
| H6 | H9  | 0.0002563566147  |
| H7 | H9  | 8.8826023098e-05 |
| H8 | H9  | 8.8825418592e-05 |
| C1 | C1  | 0.043298376259   |
| O2 | C1  | 0.013355143727   |
| O3 | C1  | 0.01546994361    |
| C4 | C1  | 0.00042353340934 |
| C5 | C1  | 0.95657214071    |
| H6 | C1  | 4.8216193936e-05 |
| H7 | C1  | 0.00015244609471 |
| H8 | C1  | 0.00025328359624 |
| H9 | C1  | 0.0364392352     |
| C1 | H11 | 0.043339956003   |
| O2 | H11 | 0.013355325264   |
| O3 | H11 | 0.015470046823   |
| C4 | H11 | 0.00042355471705 |
| C5 | H11 | 0.95656412736    |
| H6 | H11 | 4.8216783064e-05 |
| H7 | H11 | 0.00025328700281 |
| H8 | H11 | 0.00015244736358 |
| H9 | H11 | 0.036439135337   |
| C1 | H11 | 0.038874006171   |

### CCSD

| Atom A | Atom B | Delocalization index |
|--------|--------|----------------------|
| C1     | O2     | 0.72848709121        |
| C1     | O3     | 1.0818046631         |
| O2     | O3     | 0.1976756304         |
| C1     | C4     | 0.015763368714       |
| O2     | C4     | 0.72652102258        |
| O3     | C4     | 0.043620014247       |
| C1     | C5     | 0.79501550699        |
| O2     | C5     | 0.076878664833       |
| O3     | C5     | 0.082607379452       |
| C4     | C5     | 0.0071750542067      |
| C1     | H6     | 0.0049207286685      |
| O2     | H6     | 0.052796317134       |
| O3     | H6     | 0.0042119578412      |
| C4     | H6     | 0.80874014666        |
| C5     | H6     | 0.00092518878399     |
| C1     | H7     | 0.0037910895615      |
| O2     | H7     | 0.052459150039       |
| O3     | H7     | 0.021164906434       |
| C4     | H7     | 0.79906530985        |
| C5     | H7     | 0.00083009807245     |

|    |     |                  |
|----|-----|------------------|
| H6 | H7  | 0.027959487164   |
| C1 | H8  | 0.0037976629574  |
| O2 | H8  | 0.0524542679     |
| O3 | H8  | 0.021164371179   |
| C4 | H8  | 0.79905172143    |
| C5 | H8  | 0.00082990307704 |
| H6 | H8  | 0.027959660293   |
| H7 | H8  | 0.028596209916   |
| C1 | H9  | 0.027957839584   |
| O2 | H9  | 0.0081250482897  |
| O3 | H9  | 0.017164762633   |
| C4 | H9  | 0.0015864799113  |
| C5 | H9  | 0.82511610023    |
| H6 | H9  | 0.00027674365259 |
| H7 | H9  | 0.00010510055296 |
| H8 | H9  | 0.0001050992166  |
| C1 | C1  | 0.032940438097   |
| O2 | C1  | 0.012264191666   |
| O3 | C1  | 0.012055266968   |
| C4 | C1  | 0.00046428491206 |
| C5 | C1  | 0.82260551756    |
| H6 | C1  | 6.1673854498e-05 |
| H7 | C1  | 0.00018606307467 |
| H8 | C1  | 0.00027267071213 |
| H9 | C1  | 0.028656877317   |
| C1 | H11 | 0.032916212532   |
| O2 | H11 | 0.012263818227   |
| O3 | H11 | 0.012055276108   |
| C4 | H11 | 0.0004642919947  |
| C5 | H11 | 0.82261387055    |
| H6 | H11 | 6.1673040308e-05 |
| H7 | H11 | 0.00027266782161 |
| H8 | H11 | 0.00018606025602 |
| H9 | H11 | 0.028656731928   |
| C1 | H11 | 0.030597196716   |

## PHENYL ACETATE

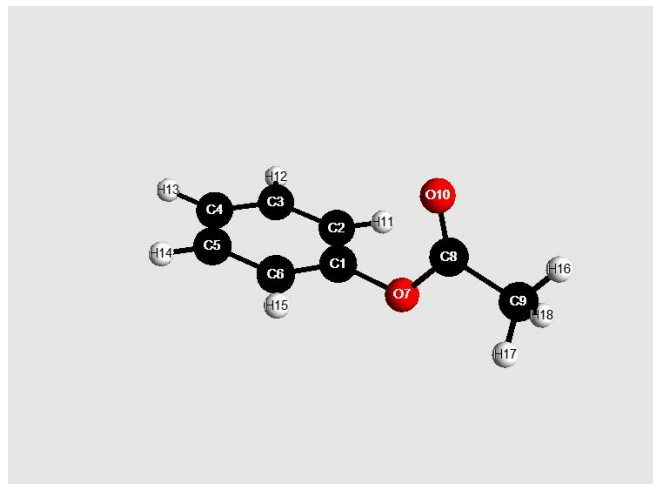

## HARTREE-FOCK

| Atom A | Atom B | Delocalization index |
|--------|--------|----------------------|
| C1     | C2     | 1.3293772286         |
| C1     | C3     | 0.075696915059       |
| C2     | C3     | 1.3827368532         |
| C1     | C4     | 0.089902525406       |
| C2     | C4     | 0.072715157997       |
| C3     | C4     | 1.3879026032         |
| C1     | C5     | 0.075704753741       |
| C2     | C5     | 0.097684736291       |
| C3     | C5     | 0.075990273017       |
| C4     | C5     | 1.3878755674         |
| C1     | C6     | 1.3293927            |
| C2     | C6     | 0.064005036814       |
| C3     | C6     | 0.097674914916       |
| C4     | C6     | 0.072713470172       |
| C5     | C6     | 1.3827833191         |
| C1     | O7     | 0.76184289855        |
| C2     | O7     | 0.09834908592        |
| C3     | O7     | 0.011846570858       |
| C4     | O7     | 0.012735384176       |
| C5     | O7     | 0.011848537421       |
| C6     | O7     | 0.098342934571       |
| C1     | C8     | 0.013412202712       |
| C2     | C8     | 0.0054687500362      |
| C3     | C8     | 0.00064681869073     |
| C4     | C8     | 0.001483219329       |
| C5     | C8     | 0.00064663529432     |
| C6     | C8     | 0.0054675062951      |
| O7     | C8     | 0.69732612764        |
| C1     | C9     | 0.006855972493       |
| C2     | C9     | 0.00099233611491     |

|     |     |                  |
|-----|-----|------------------|
| C3  | C9  | 0.00021844151463 |
| C4  | C9  | 0.00015320564238 |
| C5  | C9  | 0.00021849502262 |
| C6  | C9  | 0.00099224057235 |
| O7  | C9  | 0.092075015639   |
| C8  | C9  | 0.90825103306    |
| C1  | C1  | 0.039524828809   |
| C2  | C1  | 0.013776207434   |
| C3  | C1  | 0.0019692178259  |
| C4  | C1  | 0.0019121046423  |
| C5  | C1  | 0.0019698256808  |
| C6  | C1  | 0.013770559616   |
| O7  | C1  | 0.2655544822     |
| C8  | C1  | 1.124464234      |
| C9  | C1  | 0.10671540967    |
| C1  | H11 | 0.047155639332   |
| C2  | H11 | 0.96739865403    |
| C3  | H11 | 0.045758393238   |
| C4  | H11 | 0.0082039915722  |
| C5  | H11 | 0.0058615067227  |
| C6  | H11 | 0.0069443531846  |
| O7  | H11 | 0.014636561924   |
| C8  | H11 | 0.00060774347265 |
| C9  | H11 | 0.00015050854969 |
| C1  | H11 | 0.0019141304681  |
| C1  | H12 | 0.0083940189019  |
| C2  | H12 | 0.049183858818   |
| C3  | H12 | 0.97492085683    |
| C4  | H12 | 0.048329058962   |
| C5  | H12 | 0.0085942373779  |
| C6  | H12 | 0.0059929776648  |
| O7  | H12 | 0.0015286023121  |
| C8  | H12 | 8.5509869597e-05 |
| C9  | H12 | 4.5486322305e-05 |
| C1  | H12 | 0.00013326194124 |
| H11 | H12 | 0.0056439700535  |
| C1  | H13 | 0.0056840112747  |
| C2  | H13 | 0.008589282726   |
| C3  | H13 | 0.049296071125   |
| C4  | H13 | 0.97675707988    |
| C5  | H13 | 0.049292267322   |
| C6  | H13 | 0.0085885044436  |
| O7  | H13 | 0.00096599255718 |
| C8  | H13 | 0.00010094818909 |
| C9  | H13 | 1.1970914714e-05 |
| C1  | H13 | 0.00012726064198 |
| H11 | H13 | 0.0012782531433  |
| H12 | H13 | 0.0055725354354  |



|     |     |                  |
|-----|-----|------------------|
| C1  | H14 | 0.0083943441312  |
| C2  | H14 | 0.0059935214576  |
| C3  | H14 | 0.0085936751351  |
| C4  | H14 | 0.048329800814   |
| C5  | H14 | 0.97493688108    |
| C6  | H14 | 0.049194280045   |
| O7  | H14 | 0.0015285655719  |
| C8  | H14 | 8.5491987045e-05 |
| C9  | H14 | 4.5494004902e-05 |
| C1  | H14 | 0.00013326446337 |
| H11 | H14 | 0.00035123721235 |
| H12 | H14 | 0.0014377961346  |
| H13 | H14 | 0.0055722992084  |
| C1  | H15 | 0.04720236245    |
| C2  | H15 | 0.0069444944905  |
| C3  | H15 | 0.0058613758814  |
| C4  | H15 | 0.0082041113435  |
| C5  | H15 | 0.045768717741   |
| C6  | H15 | 0.96738326694    |
| O7  | H15 | 0.014650223499   |
| C8  | H15 | 0.00060680944525 |
| C9  | H15 | 0.00015049055723 |
| C1  | H15 | 0.0019141175095  |
| H11 | H15 | 0.001563824131   |
| H12 | H15 | 0.00035124258113 |
| H13 | H15 | 0.0012782800234  |
| H14 | H15 | 0.0056440616033  |
| C1  | H16 | 0.0013708421388  |
| C2  | H16 | 0.00015969986841 |
| C3  | H16 | 5.0424740226e-05 |
| C4  | H16 | 3.0234904463e-05 |
| C5  | H16 | 5.0425984621e-05 |
| C6  | H16 | 0.00015969060455 |
| O7  | H16 | 0.010512588651   |
| C8  | H16 | 0.035895323426   |
| C9  | H16 | 0.95915614971    |
| C1  | H16 | 0.017855534469   |
| H11 | H16 | 2.2311108584e-05 |
| H12 | H16 | 1.0711563885e-05 |
| H13 | H16 | 2.5690236411e-06 |
| H14 | H16 | 1.0711485088e-05 |
| H15 | H16 | 2.2310834442e-05 |
| C1  | H17 | 0.00039971208213 |
| C2  | H17 | 0.00021093611863 |
| C3  | H17 | 3.4761017191e-05 |
| C4  | H17 | 3.0989513677e-05 |
| C5  | H17 | 2.0811832896e-05 |
| C6  | H17 | 0.00018121543953 |

|     |     |                  |
|-----|-----|------------------|
| O7  | H17 | 0.013326498835   |
| C8  | H17 | 0.044133226851   |
| C9  | H17 | 0.95565041983    |
| C1  | H17 | 0.015822113807   |
| H11 | H17 | 1.2879539814e-05 |
| H12 | H17 | 7.256585267e-06  |
| H13 | H17 | 2.7125260599e-06 |
| H14 | H17 | 4.6871732714e-06 |
| H15 | H17 | 5.9558846911e-05 |
| H16 | H17 | 0.036452574887   |
| C1  | H18 | 0.00039965249027 |
| C2  | H18 | 0.00018134046254 |
| C3  | H18 | 2.0809417572e-05 |
| C4  | H18 | 3.098899929e-05  |
| C5  | H18 | 3.4764174828e-05 |
| C6  | H18 | 0.00021090960919 |
| O7  | H18 | 0.013325753579   |
| C8  | H18 | 0.044114501859   |
| C9  | H18 | 0.95565380386    |
| C1  | H18 | 0.015822156248   |
| H11 | H18 | 5.9557164681e-05 |
| H12 | H18 | 4.6874399351e-06 |
| H13 | H18 | 2.7125770038e-06 |
| H14 | H18 | 7.2567918667e-06 |
| H15 | H18 | 1.288048619e-05  |
| H16 | H18 | 0.036452754826   |
| H17 | H18 | 0.038930906287   |

# ALCOHOLS

## METHANOL

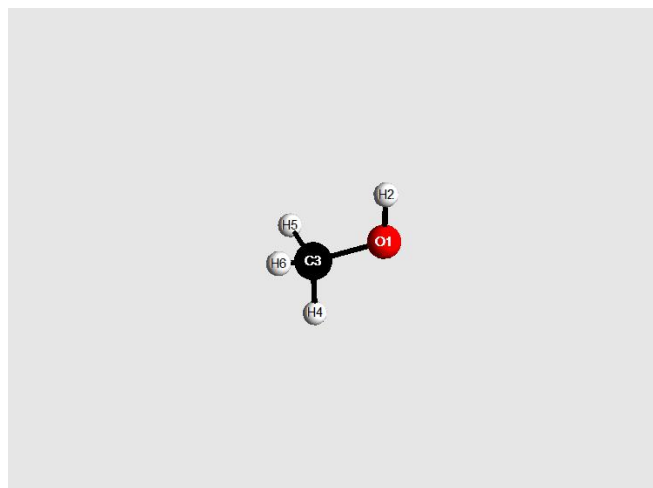

### HARTREE-FOCK

| Atom A | Atom B | Delocalization index |
|--------|--------|----------------------|
| O1     | H2     | 0.61756287608        |
| O1     | C3     | 0.82367320207        |
| H2     | C3     | 0.01144520381        |
| O1     | H4     | 0.072767308058       |
| H2     | H4     | 0.0068396357091      |
| C3     | H4     | 0.9314260154         |
| O1     | H5     | 0.082935106253       |
| H2     | H5     | 0.0010829644068      |
| C3     | H5     | 0.93355917232        |
| H4     | H5     | 0.040334829681       |
| O1     | H6     | 0.082934553697       |
| H2     | H6     | 0.0010829844823      |
| C3     | H6     | 0.9335221769         |
| H4     | H6     | 0.040335017722       |
| H5     | H6     | 0.042804466817       |

### CCSD

| Atom A | Atom B | Delocalization index |
|--------|--------|----------------------|
| O1     | H2     | 0.61026420736        |
| O1     | C3     | 0.78500237165        |
| H2     | C3     | 0.013494605823       |
| O1     | H4     | 0.053873076949       |
| H2     | H4     | 0.0063965198233      |
| C3     | H4     | 0.80606603779        |
| O1     | H5     | 0.06176480045        |
| H2     | H5     | 0.0013440351799      |
| C3     | H5     | 0.80762325153        |
| H4     | H5     | 0.031547140534       |

|    |    |                 |
|----|----|-----------------|
| O1 | H6 | 0.061763742917  |
| H2 | H6 | 0.0013440531951 |
| C3 | H6 | 0.8076434945    |
| H4 | H6 | 0.031547222551  |
| H5 | H6 | 0.033316477661  |

## PROPANOL

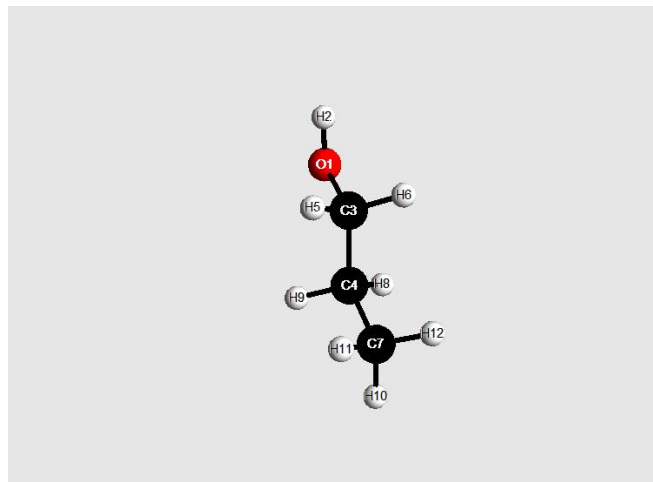

## HARTREE-FOCK

| Atom A | Atom B | Delocalization index |
|--------|--------|----------------------|
| O1     | H2     | 0.61798228493        |
| O1     | C3     | 0.7980770785         |
| H2     | C3     | 0.010760908728       |
| O1     | C4     | 0.082700658208       |
| H2     | C4     | 0.0061183974604      |
| C3     | C4     | 0.94016554761        |
| O1     | H5     | 0.082534477226       |
| H2     | H5     | 0.0010165749886      |
| C3     | H5     | 0.91667495667        |
| C4     | H5     | 0.039213134539       |
| O1     | H6     | 0.082535143035       |
| H2     | H6     | 0.0010165925389      |
| C3     | H6     | 0.91667490027        |
| C4     | H6     | 0.039185555947       |
| H5     | H6     | 0.041837242075       |
| O1     | C7     | 0.01177457527        |
| H2     | C7     | 0.0012669267006      |
| C3     | C7     | 0.044968878761       |
| C4     | C7     | 0.98048873183        |
| H5     | C7     | 0.0077003810588      |
| H6     | C7     | 0.007694012291       |
| O1     | H8     | 0.013767161928       |
| H2     | H8     | 0.00032370385043     |
| C3     | H8     | 0.040633753572       |
| C4     | H8     | 0.9468720831         |
| H5     | H8     | 0.010677349053       |
| H6     | H8     | 0.0039532017873      |
| C7     | H8     | 0.041754280492       |
| O1     | H9     | 0.013767172744       |
| H2     | H9     | 0.00032370332729     |

|     |     |                  |
|-----|-----|------------------|
| C3  | H9  | 0.040743968913   |
| C4  | H9  | 0.94685156233    |
| H5  | H9  | 0.0039531987689  |
| H6  | H9  | 0.010677350611   |
| C7  | H9  | 0.041753885957   |
| H8  | H9  | 0.041284518545   |
| O1  | O1  | 0.0020461806173  |
| H2  | O1  | 0.0002701093723  |
| C3  | O1  | 0.0099857020739  |
| C4  | O1  | 0.042178078346   |
| H5  | O1  | 0.00093489485729 |
| H6  | O1  | 0.00093488395936 |
| C7  | O1  | 0.96610200297    |
| H8  | O1  | 0.0037444911067  |
| H9  | O1  | 0.003744534478   |
| O1  | H11 | 0.0014056061803  |
| H2  | H11 | 4.1473567068e-05 |
| C3  | H11 | 0.0066708531096  |
| C4  | H11 | 0.041652498304   |
| H5  | H11 | 0.0066197986997  |
| H6  | H11 | 0.00057271660691 |
| C7  | H11 | 0.96403659272    |
| H8  | H11 | 0.011347377377   |
| H9  | H11 | 0.0035198376208  |
| O1  | H11 | 0.04380940326    |
| O1  | H12 | 0.0014057438024  |
| H2  | H12 | 4.1474972539e-05 |
| C3  | H12 | 0.0066738695342  |
| C4  | H12 | 0.041617773013   |
| H5  | H12 | 0.00057280488299 |
| H6  | H12 | 0.0066199524204  |
| C7  | H12 | 0.96402057133    |
| H8  | H12 | 0.0035198384571  |
| H9  | H12 | 0.011347394572   |
| O1  | H12 | 0.043809600047   |
| H11 | H12 | 0.044481194173   |

## ETHANOL

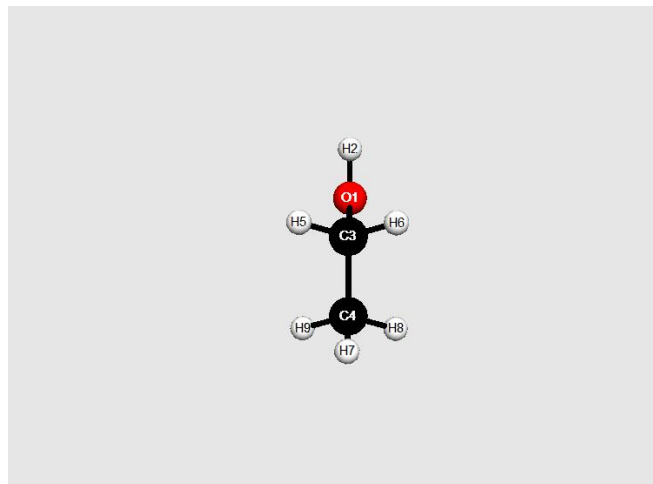

### HARTREE-FOCK

| Atom A | Atom B | Delocalization index |
|--------|--------|----------------------|
| O1     | H2     | 0.61835846834        |
| O1     | C3     | 0.79978297139        |
| H2     | C3     | 0.01080036898        |
| O1     | C4     | 0.085971316674       |
| H2     | C4     | 0.0063105164843      |
| C3     | C4     | 0.95425229805        |
| O1     | H5     | 0.083001254529       |
| H2     | H5     | 0.0010147877102      |
| C3     | H5     | 0.9204934438         |
| C4     | H5     | 0.041515350638       |
| O1     | H6     | 0.082999674613       |
| H2     | H6     | 0.0010147679089      |
| C3     | H6     | 0.92042913977        |
| C4     | H6     | 0.041507305871       |
| H5     | H6     | 0.041764378408       |
| O1     | H7     | 0.013148942094       |
| H2     | H7     | 0.001490971599       |
| C3     | H7     | 0.043381719004       |
| C4     | H7     | 0.96705531927        |
| H5     | H7     | 0.0037340452406      |
| H6     | H7     | 0.0037340359073      |
| O1     | H8     | 0.012502053014       |
| H2     | H8     | 0.00030170030622     |
| C3     | H8     | 0.040686347127       |
| C4     | H8     | 0.9608981877         |
| H5     | H8     | 0.011158827301       |
| H6     | H8     | 0.0040098882027      |
| H7     | H8     | 0.042118017828       |
| O1     | H9     | 0.012502049766       |
| H2     | H9     | 0.00030170763781     |

|    |    |                 |
|----|----|-----------------|
| C3 | H9 | 0.040580950092  |
| C4 | H9 | 0.96086095661   |
| H5 | H9 | 0.0040100736147 |
| H6 | H9 | 0.011158807789  |
| H7 | H9 | 0.042118069134  |
| H8 | H9 | 0.041656182426  |

#### CCSD

| Atom A | Atom B | Delocalization index |
|--------|--------|----------------------|
| O1     | H2     | 0.61008569398        |
| O1     | C3     | 0.76259235258        |
| H2     | C3     | 0.012705430622       |
| O1     | C4     | 0.070900829844       |
| H2     | C4     | 0.0058779618384      |
| C3     | C4     | 0.82781789474        |
| O1     | H5     | 0.06204730154        |
| H2     | H5     | 0.0013140744611      |
| C3     | H5     | 0.79482089308        |
| C4     | H5     | 0.033783571026       |
| O1     | H6     | 0.062047407931       |
| H2     | H6     | 0.0013141183628      |
| C3     | H6     | 0.794893826          |
| C4     | H6     | 0.033733974993       |
| H5     | H6     | 0.032454031161       |
| O1     | H7     | 0.010479154489       |
| H2     | H7     | 0.0016312247052      |
| C3     | H7     | 0.034737036038       |
| C4     | H7     | 0.83144060907        |
| H5     | H7     | 0.0033236362191      |
| H6     | H7     | 0.0033237518944      |
| O1     | H8     | 0.012652178544       |
| H2     | H8     | 0.0003940691511      |
| C3     | H8     | 0.032354987841       |
| C4     | H8     | 0.82544498758        |
| H5     | H8     | 0.0089851117147      |
| H6     | H8     | 0.0034598187417      |
| H7     | H8     | 0.032501996471       |
| O1     | H9     | 0.012652396847       |
| H2     | H9     | 0.00039408253484     |
| C3     | H9     | 0.032247402982       |
| C4     | H9     | 0.82537251857        |
| H5     | H9     | 0.0034597154942      |
| H6     | H9     | 0.0089851524126      |
| H7     | H9     | 0.032502093626       |
| H8     | H9     | 0.032293960911       |



# ALDEHYDES AND KETONES

## PENTANAL

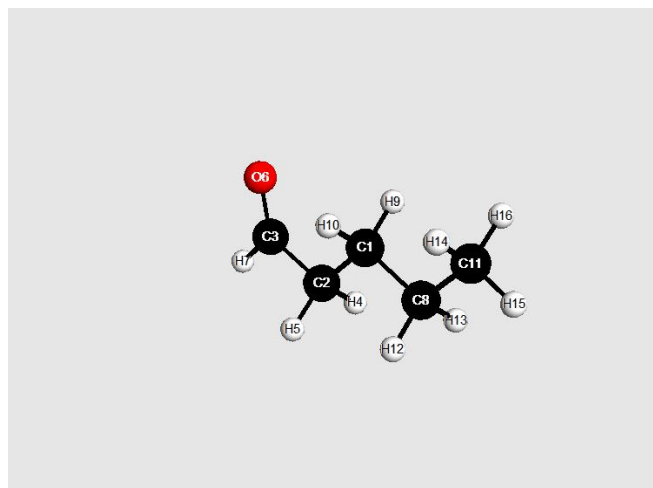

### HARTREE-FOCK

| Atom A | Atom B | Delocalization index |
|--------|--------|----------------------|
| C1     | C2     | 0.96813612277        |
| C1     | C3     | 0.033841651294       |
| C2     | C3     | 0.93888875696        |
| C1     | H4     | 0.036577240318       |
| C2     | H4     | 0.94052639974        |
| C3     | H4     | 0.051913960924       |
| C1     | H5     | 0.036590166913       |
| C2     | H5     | 0.94059811216        |
| C3     | H5     | 0.051897282599       |
| H4     | H5     | 0.042273907069       |
| C1     | O6     | 0.028769782462       |
| C2     | O6     | 0.11208975877        |
| C3     | O6     | 1.3122110767         |
| H4     | O6     | 0.018558793071       |
| H5     | O6     | 0.018554091393       |
| C1     | H7     | 0.0081591508819      |
| C2     | H7     | 0.05003266217        |
| C3     | H7     | 0.88888261522        |
| H4     | H7     | 0.0039075921562      |
| H5     | H7     | 0.0039101010466      |
| O6     | H7     | 0.12564954982        |
| C1     | C8     | 0.96635025697        |
| C2     | C8     | 0.045595774506       |
| C3     | C8     | 0.0079308599596      |
| H4     | C8     | 0.0070812986877      |
| H5     | C8     | 0.0070875488649      |
| O6     | C8     | 0.0035246106981      |
| H7     | C8     | 0.0014302055743      |

|     |     |                  |
|-----|-----|------------------|
| C1  | H9  | 0.94148796921    |
| C2  | H9  | 0.042907249193   |
| C3  | H9  | 0.0036895211686  |
| H4  | H9  | 0.0032620159226  |
| H5  | H9  | 0.010548349589   |
| O6  | H9  | 0.013412343452   |
| H7  | H9  | 0.00047529031447 |
| C8  | H9  | 0.039422040223   |
| C1  | C1  | 0.94153511324    |
| C2  | C1  | 0.042920618145   |
| C3  | C1  | 0.0037097822577  |
| H4  | C1  | 0.010548755708   |
| H5  | C1  | 0.0032645869681  |
| O6  | C1  | 0.013391707499   |
| H7  | C1  | 0.0004748125773  |
| C8  | C1  | 0.039427741743   |
| H9  | C1  | 0.041037127428   |
| C1  | C11 | 0.044400985235   |
| C2  | C11 | 0.0093483701367  |
| C3  | C11 | 0.0015038476825  |
| H4  | C11 | 0.00077326498273 |
| H5  | C11 | 0.0007733777047  |
| O6  | C11 | 0.00023864816952 |
| H7  | C11 | 0.00048107692269 |
| C8  | C11 | 0.9776844149     |
| H9  | C11 | 0.0077087818766  |
| C1  | C11 | 0.0076985755108  |
| C1  | H12 | 0.042546899117   |
| C2  | H12 | 0.0079598262997  |
| C3  | H12 | 0.00064399171584 |
| H4  | H12 | 0.00054949647787 |
| H5  | H12 | 0.0067160346018  |
| O6  | H12 | 0.00067531376992 |
| H7  | H12 | 6.3819745607e-05 |
| C8  | H12 | 0.94861956237    |
| H9  | H12 | 0.010933225463   |
| C1  | H12 | 0.0035394568632  |
| C11 | H12 | 0.043634950768   |
| C1  | H13 | 0.042544538817   |
| C2  | H13 | 0.0079559055561  |
| C3  | H13 | 0.00064487764688 |
| H4  | H13 | 0.0067201333133  |
| H5  | H13 | 0.00054932157588 |
| O6  | H13 | 0.0006750636051  |
| H7  | H13 | 6.3834448654e-05 |
| C8  | H13 | 0.94862589157    |
| H9  | H13 | 0.0035383204148  |
| C1  | H13 | 0.010933937981   |

|     |     |                  |
|-----|-----|------------------|
| C11 | H13 | 0.04366313636    |
| H12 | H13 | 0.044628328693   |
| C1  | H14 | 0.007181382032   |
| C2  | H14 | 0.00077483191828 |
| C3  | H14 | 5.9067988986e-05 |
| H4  | H14 | 0.00034865267933 |
| H5  | H14 | 4.3494028072e-05 |
| O6  | H14 | 4.4635696384e-05 |
| H7  | H14 | 1.7072641269e-05 |
| C8  | H14 | 0.041806171136   |
| H9  | H14 | 0.00053292894978 |
| C1  | H14 | 0.0064016724076  |
| C11 | H14 | 0.96265785783    |
| H12 | H14 | 0.0036874791741  |
| H13 | H14 | 0.011541522009   |
| C1  | H15 | 0.010326458102   |
| C2  | H15 | 0.0019041979637  |
| C3  | H15 | 0.00036177034708 |
| H4  | H15 | 5.001392327e-05  |
| H5  | H15 | 4.9996953464e-05 |
| O6  | H15 | 7.455709697e-05  |
| H7  | H15 | 0.00013474554453 |
| C8  | H15 | 0.042525294342   |
| H9  | H15 | 0.00082937485868 |
| C1  | H15 | 0.00082943970692 |
| C11 | H15 | 0.96661879869    |
| H12 | H15 | 0.0039082420246  |
| H13 | H15 | 0.0039096085717  |
| H14 | H15 | 0.044060114486   |
| C1  | H16 | 0.007178920105   |
| C2  | H16 | 0.00077528585648 |
| C3  | H16 | 5.9069508311e-05 |
| H4  | H16 | 4.3502277515e-05 |
| H5  | H16 | 0.00034860132228 |
| O6  | H16 | 4.4657707011e-05 |
| H7  | H16 | 1.7073439989e-05 |
| C8  | H16 | 0.04181070687    |
| H9  | H16 | 0.0064029168533  |
| C1  | H16 | 0.00053297186433 |
| C11 | H16 | 0.96287130055    |
| H12 | H16 | 0.01154160538    |
| H13 | H16 | 0.0036860870789  |
| H14 | H16 | 0.044460386278   |
| H15 | H16 | 0.044059539085   |

## PROPANAL

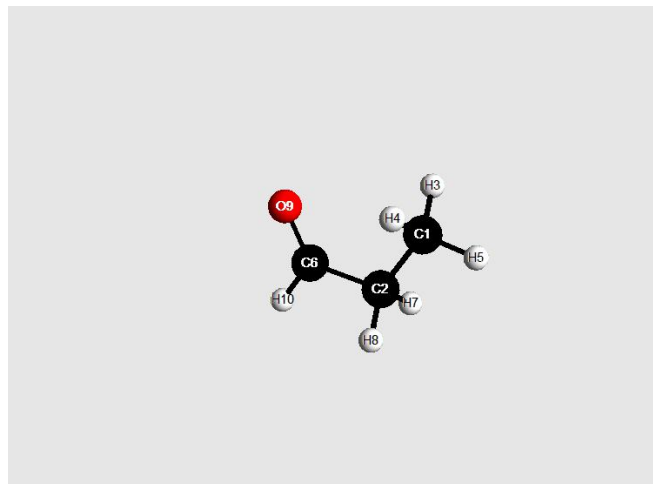

### HARTREE-FOCK

| Atom A | Atom B | Delocalization index |
|--------|--------|----------------------|
| C1     | C2     | 0.98209264359        |
| C1     | H3     | 0.9594262994         |
| C2     | H3     | 0.042833605775       |
| C1     | H4     | 0.95939970405        |
| C2     | H4     | 0.04284637294        |
| H3     | H4     | 0.041286286627       |
| C1     | H5     | 0.96695303923        |
| C2     | H5     | 0.045469486003       |
| H3     | H5     | 0.042055592374       |
| H4     | H5     | 0.042057432242       |
| C1     | C6     | 0.035189576086       |
| C2     | C6     | 0.93773569222        |
| H3     | C6     | 0.0037134916596      |
| H4     | C6     | 0.0037049587414      |
| H5     | C6     | 0.0091392134553      |
| C1     | H7     | 0.038570496132       |
| C2     | H7     | 0.94491772132        |
| H3     | H7     | 0.0032562434857      |
| H4     | H7     | 0.010935520191       |
| H5     | H7     | 0.0036058074265      |
| C6     | H7     | 0.052023599649       |
| C1     | H8     | 0.038591164391       |
| C2     | H8     | 0.94492507885        |
| H3     | H8     | 0.010938027873       |
| H4     | H8     | 0.0032697846443      |
| H5     | H8     | 0.0035956370487      |
| C6     | H8     | 0.052064594939       |
| H7     | H8     | 0.04213510985        |
| C1     | O9     | 0.031120456256       |
| C2     | O9     | 0.11297738119        |

|    |    |                  |
|----|----|------------------|
| H3 | O9 | 0.012084811602   |
| H4 | O9 | 0.012068501469   |
| H5 | O9 | 0.0039500447662  |
| C6 | O9 | 1.3115502926     |
| H7 | O9 | 0.018907420174   |
| H8 | O9 | 0.018924885671   |
| C1 | C1 | 0.0084890868496  |
| C2 | C1 | 0.049926516983   |
| H3 | C1 | 0.00054613729008 |
| H4 | C1 | 0.00054594915637 |
| H5 | C1 | 0.0017810629026  |
| C6 | C1 | 0.8889530272     |
| H7 | C1 | 0.0038971458243  |
| H8 | C1 | 0.0038967086675  |
| O9 | C1 | 0.12540115498    |

### CCSD

| Atom A | Atom B | Delocalization index |
|--------|--------|----------------------|
| C1     | C2     | 0.81586787159        |
| C1     | O3     | 0.08612358564        |
| C2     | O3     | 1.2206722741         |
| C1     | H4     | 0.03998875845        |
| C2     | H4     | 0.76792723005        |
| O3     | H4     | 0.092970414718       |
| C1     | C5     | 0.84615404063        |
| C2     | C5     | 0.02950378696        |
| O3     | C5     | 0.032184621791       |
| H4     | C5     | 0.0067737298045      |
| C1     | H6     | 0.80990126573        |
| C2     | H6     | 0.040138380451       |
| O3     | H6     | 0.014852595008       |
| H4     | H6     | 0.0035357649369      |
| C5     | H6     | 0.031114514043       |
| C1     | H7     | 0.80979321092        |
| C2     | H7     | 0.040131551505       |
| O3     | H7     | 0.014852685906       |
| H4     | H7     | 0.0035357118936      |
| C5     | H7     | 0.031082742628       |
| H6     | H7     | 0.032680675117       |
| C1     | H8     | 0.035602538148       |
| C2     | H8     | 0.0071300076099      |
| O3     | H8     | 0.0035286377727      |
| H4     | H8     | 0.0015614556232      |
| C5     | H8     | 0.83174104275        |
| H6     | H8     | 0.0030834913136      |
| H7     | H8     | 0.0030834915337      |
| C1     | H9     | 0.033424572906       |
| C2     | H9     | 0.0036918412734      |

|    |    |                  |
|----|----|------------------|
| O3 | H9 | 0.013446896193   |
| H4 | H9 | 0.00062445932806 |
| C5 | H9 | 0.82340402599    |
| H6 | H9 | 0.0087220802225  |
| H7 | H9 | 0.0028017080937  |
| H8 | H9 | 0.03227828795    |
| C1 | C1 | 0.03346536412    |
| C2 | C1 | 0.0036897619173  |
| O3 | C1 | 0.013446941123   |
| H4 | C1 | 0.00062445153018 |
| C5 | C1 | 0.82350846959    |
| H6 | C1 | 0.0028017045781  |
| H7 | C1 | 0.0087221084163  |
| H8 | C1 | 0.032278215614   |
| H9 | C1 | 0.03199750404    |

## ISOBUTYRALDEHYDE

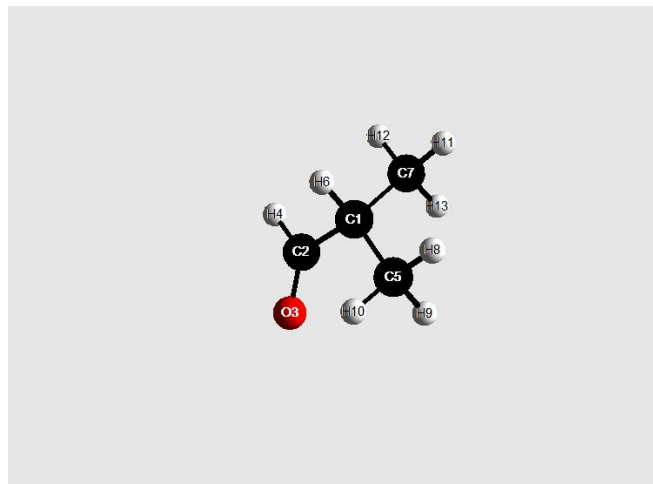

### HARTREE-FOCK

| Atom A | Atom B | Delocalization index |
|--------|--------|----------------------|
| C1     | C2     | 0.92209908936        |
| C1     | O3     | 0.10884577513        |
| C2     | O3     | 1.305112647          |
| C1     | H4     | 0.047851577349       |
| C2     | H4     | 0.88277930892        |
| O3     | H4     | 0.12498343601        |
| C1     | C5     | 0.97135285197        |
| C2     | C5     | 0.035545556845       |
| O3     | C5     | 0.033127856938       |
| H4     | C5     | 0.0080945257082      |
| C1     | H6     | 0.93095393628        |
| C2     | H6     | 0.052518025496       |
| O3     | H6     | 0.018076255404       |
| H4     | H6     | 0.0036767644528      |
| C5     | H6     | 0.039166477214       |
| C1     | C7     | 0.96290197042        |
| C2     | C7     | 0.053209177637       |
| O3     | C7     | 0.017401953074       |
| H4     | C7     | 0.0084683795022      |
| C5     | C7     | 0.042696870606       |
| H6     | C7     | 0.04174807126        |
| C1     | H8     | 0.04316703014        |
| C2     | H8     | 0.0089252627926      |
| O3     | H8     | 0.0039474713135      |
| H4     | H8     | 0.0018627484469      |
| C5     | H8     | 0.96314013995        |
| H6     | H8     | 0.0036500087499      |
| C7     | H8     | 0.0075193680076      |
| C1     | H9     | 0.041024832214       |
| C2     | H9     | 0.0036411358193      |

|     |     |                  |
|-----|-----|------------------|
| O3  | H9  | 0.011867019041   |
| H4  | H9  | 0.0005368077842  |
| C5  | H9  | 0.95550909671    |
| H6  | H9  | 0.01076700683    |
| C7  | H9  | 0.0070263848649  |
| H8  | H9  | 0.042010790132   |
| C1  | C1  | 0.040671890253   |
| C2  | C1  | 0.0036658546869  |
| O3  | C1  | 0.014764779956   |
| H4  | C1  | 0.00050794922829 |
| C5  | C1  | 0.95764861154    |
| H6  | C1  | 0.0033654992311  |
| C7  | C1  | 0.0098506729609  |
| H8  | C1  | 0.041107160547   |
| H9  | C1  | 0.04047771504    |
| C1  | H11 | 0.040785443608   |
| C2  | H11 | 0.010032161207   |
| O3  | H11 | 0.0034836860822  |
| H4  | H11 | 0.0010465393225  |
| C5  | H11 | 0.0069339094898  |
| H6  | H11 | 0.0043089956472  |
| C7  | H11 | 0.96069176758    |
| H8  | H11 | 0.0060368731751  |
| H9  | H11 | 0.00047078983781 |
| C1  | H11 | 0.00070351512601 |
| C1  | H12 | 0.040846861965   |
| C2  | H12 | 0.0083758259275  |
| O3  | H12 | 0.0021115113821  |
| H4  | H12 | 0.0086331464426  |
| C5  | H12 | 0.0098118935358  |
| H6  | H12 | 0.003554565014   |
| C7  | H12 | 0.9623698022     |
| H8  | H12 | 0.00073120885665 |
| H9  | H12 | 0.00072081262899 |
| C1  | H12 | 0.0023533581104  |
| H11 | H12 | 0.042044840553   |
| C1  | H13 | 0.040967756554   |
| C2  | H13 | 0.0053826684428  |
| O3  | H13 | 0.003001528413   |
| H4  | H13 | 0.00053528825522 |
| C5  | H13 | 0.007275747894   |
| H6  | H13 | 0.011089489069   |
| C7  | H13 | 0.96048534857    |
| H8  | H13 | 0.00051238280976 |
| H9  | H13 | 0.0057166479116  |
| C1  | H13 | 0.00076044599549 |
| H11 | H13 | 0.042040544675   |
| H12 | H13 | 0.042217706623   |





## ETHYL METHYL KETONE

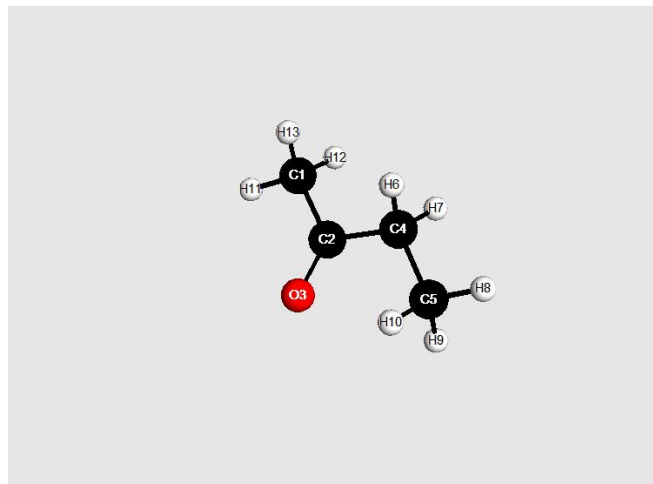

### HARTREE-FOCK

| Atom A | Atom B | Delocalization index |
|--------|--------|----------------------|
| C1     | C2     | 0.93153755398        |
| C1     | O3     | 0.12503192542        |
| C2     | O3     | 1.2646229678         |
| C1     | C4     | 0.050131833207       |
| C2     | C4     | 0.92217135166        |
| O3     | C4     | 0.11435108289        |
| C1     | C5     | 0.0071831754397      |
| C2     | C5     | 0.033337649705       |
| O3     | C5     | 0.034441456329       |
| C4     | C5     | 0.98242944283        |
| C1     | H6     | 0.007760723371       |
| C2     | H6     | 0.047027669283       |
| O3     | H6     | 0.017074740633       |
| C4     | H6     | 0.94477608656        |
| C5     | H6     | 0.038926309704       |
| C1     | H7     | 0.0077539394173      |
| C2     | H7     | 0.046992674143       |
| O3     | H7     | 0.017068808353       |
| C4     | H7     | 0.94473593481        |
| C5     | H7     | 0.038927463493       |
| H6     | H7     | 0.042141882469       |
| C1     | H8     | 0.0013942733127      |
| C2     | H8     | 0.0090611401893      |
| O3     | H8     | 0.0042165135072      |
| C4     | H8     | 0.045420865522       |
| C5     | H8     | 0.96711756261        |
| H6     | H8     | 0.0036693681443      |
| H7     | H8     | 0.0036703174332      |
| C1     | H9     | 0.00055262154946     |
| C2     | H9     | 0.0034397641719      |

|     |     |                  |
|-----|-----|------------------|
| O3  | H9  | 0.013667050261   |
| C4  | H9  | 0.042232209308   |
| C5  | H9  | 0.95855329867    |
| H6  | H9  | 0.010835560596   |
| H7  | H9  | 0.0033108585311  |
| H8  | H9  | 0.041830801959   |
| C1  | C1  | 0.00055263801531 |
| C2  | C1  | 0.003425508163   |
| O3  | C1  | 0.013679761523   |
| C4  | C1  | 0.042229371192   |
| C5  | C1  | 0.95858607321    |
| H6  | C1  | 0.0033120893029  |
| H7  | C1  | 0.010835092431   |
| H8  | C1  | 0.041829208964   |
| H9  | C1  | 0.040927732638   |
| C1  | H11 | 0.95815435924    |
| C2  | H11 | 0.034864610348   |
| O3  | H11 | 0.021228713527   |
| C4  | H11 | 0.0079945945545  |
| C5  | H11 | 0.0017266078646  |
| H6  | H11 | 0.00079442537966 |
| H7  | H11 | 0.000797364266   |
| H8  | H11 | 0.00039890145461 |
| H9  | H11 | 5.5483294481e-05 |
| C1  | H11 | 5.5512973164e-05 |
| C1  | H12 | 0.96075717733    |
| C2  | H12 | 0.043906074296   |
| O3  | H12 | 0.018079717759   |
| C4  | H12 | 0.0065207037772  |
| C5  | H12 | 0.00066464677211 |
| H6  | H12 | 0.00064390594339 |
| H7  | H12 | 0.0063298161897  |
| H8  | H12 | 5.2279420778e-05 |
| H9  | H12 | 8.7648693254e-05 |
| C1  | H12 | 0.00021680982397 |
| H11 | H12 | 0.037749885474   |
| C1  | H13 | 0.96085184574    |
| C2  | H13 | 0.043884396537   |
| O3  | H13 | 0.018070954412   |
| C4  | H13 | 0.006545079989   |
| C5  | H13 | 0.00066700671564 |
| H6  | H13 | 0.0063347404043  |
| H7  | H13 | 0.00064435019786 |
| H8  | H13 | 5.2352281614e-05 |
| H9  | H13 | 0.00021701541419 |
| C1  | H13 | 8.7629569625e-05 |
| H11 | H13 | 0.037750252173   |
| H12 | H13 | 0.041638774003   |

## CCSD

| Atom A | Atom B | Delocalization index |
|--------|--------|----------------------|
| C1     | C2     | 0.79555406279        |
| C1     | O3     | 0.092483262845       |
| C2     | O3     | 1.1853734866         |
| C1     | C4     | 0.041119848221       |
| C2     | C4     | 0.81037499056        |
| O3     | C4     | 0.096759130312       |
| C1     | H5     | 0.81074539358        |
| C2     | H5     | 0.029491854945       |
| O3     | H5     | 0.020788090798       |
| C4     | H5     | 0.005554400897       |
| C1     | C6     | 0.83573186271        |
| C2     | C6     | 0.040521425282       |
| O3     | C6     | 0.018258704131       |
| C4     | C6     | 0.0049025540139      |
| H5     | C6     | 0.03144469407        |
| C1     | H7     | 0.8156903017         |
| C2     | H7     | 0.031077945196       |
| O3     | H7     | 0.011515108486       |
| C4     | H7     | 0.010308099466       |
| H5     | H7     | 0.029764311361       |
| C6     | H7     | 0.033191169461       |
| C1     | H8     | 0.033967715111       |
| C2     | H8     | 0.0076435336644      |
| O3     | H8     | 0.0032010191722      |
| C4     | H8     | 0.00084059294742     |
| H5     | H8     | 0.0031075877766      |
| C6     | H8     | 0.82920673826        |
| H7     | H8     | 0.0034005753079      |
| C1     | H9     | 0.032764762145       |
| C2     | H9     | 0.0052006052174      |
| O3     | H9     | 0.0083207273017      |
| C4     | H9     | 0.0004673425632      |
| H5     | H9     | 0.0030851198985      |
| C6     | H9     | 0.82525124659        |
| H7     | H9     | 0.0087318223359      |
| H8     | H9     | 0.032128927615       |
| C1     | C1     | 0.033444025217       |
| C2     | C1     | 0.0047428714807      |
| O3     | C1     | 0.0011401076155      |
| C4     | C1     | 0.0052869537025      |
| H5     | C1     | 0.0086719316837      |
| C6     | C1     | 0.82631157291        |
| H7     | C1     | 0.0029048392018      |
| H8     | C1     | 0.033067434501       |
| H9     | C1     | 0.032634824981       |
| C1     | H11    | 0.0065239203945      |

|     |     |                  |
|-----|-----|------------------|
| C2  | H11 | 0.027420456458   |
| O3  | H11 | 0.020180927069   |
| C4  | H11 | 0.82370934405    |
| H5  | H11 | 0.0014375574292  |
| C6  | H11 | 0.00048931143201 |
| H7  | H11 | 0.0011810006971  |
| H8  | H11 | 0.00014773505743 |
| H9  | H11 | 4.643696211e-05  |
| C1  | H11 | 0.00044361507023 |
| C1  | H12 | 0.0043269456066  |
| C2  | H12 | 0.035438502512   |
| O3  | H12 | 0.015032426974   |
| C4  | H12 | 0.82340390792    |
| H5  | H12 | 0.00032631007625 |
| C6  | H12 | 0.00076669546131 |
| H7  | H12 | 0.005231196554   |
| H8  | H12 | 9.6563179684e-05 |
| H9  | H12 | 0.00018089830102 |
| C1  | H12 | 0.00047357275969 |
| H11 | H12 | 0.029431051407   |
| C1  | H13 | 0.0052776879214  |
| C2  | H13 | 0.032020821785   |
| O3  | H13 | 0.013780576683   |
| C4  | H13 | 0.82298012888    |
| H5  | H13 | 0.00062452463991 |
| C6  | H13 | 0.0054190453847  |
| H7  | H13 | 0.0022543789506  |
| H8  | H13 | 0.0006207804286  |
| H9  | H13 | 0.00037696998298 |
| C1  | H13 | 0.010958973637   |
| H11 | H13 | 0.029250091368   |
| H12 | H13 | 0.03224142612    |

## DIETHYL KETONE

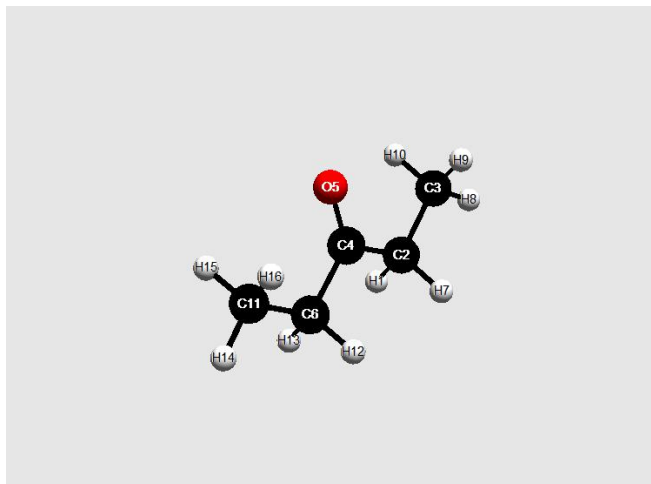

### HARTREE-FOCK

| Atom A | Atom B | Delocalization index |
|--------|--------|----------------------|
| H1     | C2     | 0.94466673393        |
| H1     | C3     | 0.039033728651       |
| C2     | C3     | 0.98224541298        |
| H1     | C4     | 0.046568841004       |
| C2     | C4     | 0.92089621437        |
| C3     | C4     | 0.033344826854       |
| H1     | O5     | 0.016857356372       |
| C2     | O5     | 0.11400559667        |
| C3     | O5     | 0.034677401778       |
| C4     | O5     | 1.2601639717         |
| H1     | C6     | 0.0075326106123      |
| C2     | C6     | 0.048851316095       |
| C3     | C6     | 0.0069016380746      |
| C4     | C6     | 0.92111839568        |
| O5     | C6     | 0.11430040938        |
| H1     | H7     | 0.042142891632       |
| C2     | H7     | 0.94485339119        |
| C3     | H7     | 0.039057477596       |
| C4     | H7     | 0.046422385798       |
| O5     | H7     | 0.016758495353       |
| C6     | H7     | 0.0076904192926      |
| H1     | H8     | 0.0036864173486      |
| C2     | H8     | 0.045399701564       |
| C3     | H8     | 0.9671200609         |
| C4     | H8     | 0.0090804373659      |
| O5     | H8     | 0.0042426601001      |
| C6     | H8     | 0.0013427360295      |
| H7     | H8     | 0.0036905210978      |
| H1     | H9     | 0.010833277936       |
| C2     | H9     | 0.042230764199       |

|     |     |                  |
|-----|-----|------------------|
| C3  | H9  | 0.95866112065    |
| C4  | H9  | 0.003436943609   |
| O5  | H9  | 0.013682602539   |
| C6  | H9  | 0.00053123491099 |
| H7  | H9  | 0.003321728401   |
| H8  | H9  | 0.041918948805   |
| H1  | H1  | 0.0033316472028  |
| C2  | H1  | 0.042113286131   |
| C3  | H1  | 0.95853356769    |
| C4  | H1  | 0.003408000029   |
| O5  | H1  | 0.013945084569   |
| C6  | H1  | 0.0005411539464  |
| H7  | H1  | 0.010824162278   |
| H8  | H1  | 0.041878050428   |
| H9  | H1  | 0.041004799369   |
| H1  | C11 | 0.00075315650243 |
| C2  | C11 | 0.0069011230229  |
| C3  | C11 | 0.0014888719285  |
| C4  | C11 | 0.033403294012   |
| O5  | C11 | 0.034716506666   |
| C6  | C11 | 0.98259271521    |
| H7  | C11 | 0.00079022892078 |
| H8  | C11 | 0.00033025504533 |
| H9  | C11 | 5.9677465371e-05 |
| H1  | C11 | 6.0287297249e-05 |
| H1  | H12 | 0.00074491357366 |
| C2  | H12 | 0.007520746627   |
| C3  | H12 | 0.00075223897473 |
| C4  | H12 | 0.046643935123   |
| O5  | H12 | 0.016868089762   |
| C6  | H12 | 0.94474668153    |
| H7  | H12 | 0.0075612473376  |
| H8  | H12 | 4.289430372e-05  |
| H9  | H12 | 8.5974346063e-05 |
| H1  | H12 | 0.00024292254224 |
| C11 | H12 | 0.039063125482   |
| H1  | H13 | 0.0075781039949  |
| C2  | H13 | 0.0076857914216  |
| C3  | H13 | 0.00079074373221 |
| C4  | H13 | 0.04636430991    |
| O5  | H13 | 0.016750490878   |
| C6  | H13 | 0.94494466178    |
| H7  | H13 | 0.00076090911032 |
| H8  | H13 | 4.4091772892e-05 |
| H9  | H13 | 0.00024532077888 |
| H1  | H13 | 8.5888152728e-05 |
| C11 | H13 | 0.039058011137   |
| H12 | H13 | 0.042144952983   |

|     |     |                  |
|-----|-----|------------------|
| H1  | H14 | 4.2947118176e-05 |
| C2  | H14 | 0.0013423778629  |
| C3  | H14 | 0.00033026855763 |
| C4  | H14 | 0.0090836932542  |
| O5  | H14 | 0.0042434883834  |
| C6  | H14 | 0.04542973062    |
| H7  | H14 | 4.4034306134e-05 |
| H8  | H14 | 0.00010664453549 |
| H9  | H14 | 1.3044310933e-05 |
| H1  | H14 | 1.3012218305e-05 |
| C11 | H14 | 0.96716269765    |
| H12 | H14 | 0.0036885656018  |
| H13 | H14 | 0.0036891881253  |
| H1  | H15 | 8.5998070829e-05 |
| C2  | H15 | 0.00053036472481 |
| C3  | H15 | 5.9566307016e-05 |
| C4  | H15 | 0.0034518269383  |
| O5  | H15 | 0.013655807176   |
| C6  | H15 | 0.042229041513   |
| H7  | H15 | 0.00024509594595 |
| H8  | H15 | 1.3026768734e-05 |
| H9  | H15 | 1.0938149153e-05 |
| H1  | H15 | 9.6754188493e-06 |
| C11 | H15 | 0.95879784591    |
| H12 | H15 | 0.010835642287   |
| H13 | H15 | 0.0033226248564  |
| H14 | H15 | 0.041924509969   |
| H1  | H16 | 0.00024313742813 |
| C2  | H16 | 0.00054117228768 |
| C3  | H16 | 6.0369638934e-05 |
| C4  | H16 | 0.0034064406819  |
| O5  | H16 | 0.013975967442   |
| C6  | H16 | 0.042198942663   |
| H7  | H16 | 8.5872484609e-05 |
| H8  | H16 | 1.3027188187e-05 |
| H9  | H16 | 9.7060171567e-06 |
| H1  | H16 | 1.1240103678e-05 |
| C11 | H16 | 0.95865734707    |
| H12 | H16 | 0.0033305768098  |
| H13 | H16 | 0.010824342197   |
| H14 | H16 | 0.041873540196   |
| H15 | H16 | 0.041005691901   |



## HEPTANAL

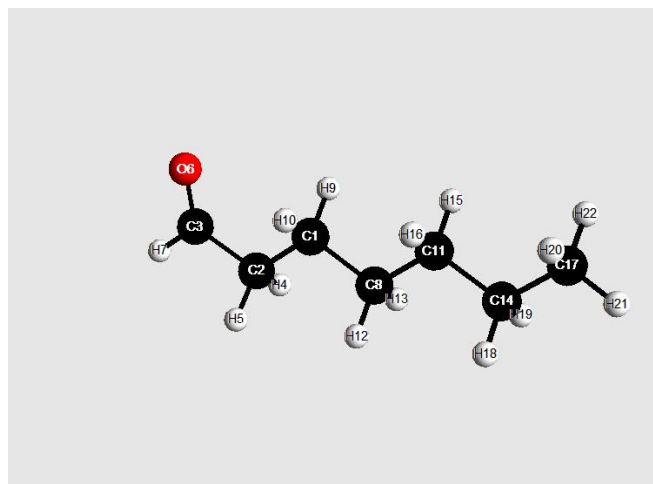

## HARTREE-FOCK

| Atom A | Atom B | Delocalization index |
|--------|--------|----------------------|
| C1     | C2     | 0.96805735649        |
| C1     | C3     | 0.033752147229       |
| C2     | C3     | 0.93860879794        |
| C1     | H4     | 0.0365678829         |
| C2     | H4     | 0.94045376905        |
| C3     | H4     | 0.051932539184       |
| C1     | H5     | 0.036546178293       |
| C2     | H5     | 0.94033829457        |
| C3     | H5     | 0.051937277096       |
| H4     | H5     | 0.042285921515       |
| C1     | O6     | 0.028842864529       |
| C2     | O6     | 0.11197766769        |
| C3     | O6     | 1.3115051518         |
| H4     | O6     | 0.018548565827       |
| H5     | O6     | 0.018551509095       |
| C1     | H7     | 0.008158454328       |
| C2     | H7     | 0.049979817277       |
| C3     | H7     | 0.88888724652        |
| H4     | H7     | 0.0039121638322      |
| H5     | H7     | 0.003910325079       |
| O6     | H7     | 0.12570286706        |
| C1     | C8     | 0.9661661839         |
| C2     | C8     | 0.045651981433       |
| C3     | C8     | 0.0079297077215      |
| H4     | C8     | 0.0070977292229      |
| H5     | C8     | 0.0070900859052      |
| O6     | C8     | 0.003510146441       |
| H7     | C8     | 0.0014309000887      |
| C1     | H9     | 0.94173087519        |
| C2     | H9     | 0.042959056378       |

|     |     |                  |
|-----|-----|------------------|
| C3  | H9  | 0.0036899338489  |
| H4  | H9  | 0.0032631697851  |
| H5  | H9  | 0.010537907005   |
| O6  | H9  | 0.013445759791   |
| H7  | H9  | 0.00047589198165 |
| C8  | H9  | 0.039200240969   |
| C1  | C1  | 0.94162244827    |
| C2  | C1  | 0.04292714305    |
| C3  | C1  | 0.0036892753015  |
| H4  | C1  | 0.010538419544   |
| H5  | C1  | 0.0032699404074  |
| O6  | C1  | 0.013421859658   |
| H7  | C1  | 0.00047549670717 |
| C8  | C1  | 0.039202336363   |
| H9  | C1  | 0.04100481106    |
| C1  | C11 | 0.042504295884   |
| C2  | C11 | 0.0090806146779  |
| C3  | C11 | 0.0014628686002  |
| H4  | C11 | 0.00075960651704 |
| H5  | C11 | 0.00075832015987 |
| O6  | C11 | 0.00022552363404 |
| H7  | C11 | 0.0004674083306  |
| C8  | C11 | 0.96544914576    |
| H9  | C11 | 0.0073715677759  |
| C1  | C11 | 0.0073758386582  |
| C1  | H12 | 0.042107514025   |
| C2  | H12 | 0.0079923893628  |
| C3  | H12 | 0.00064314510547 |
| H4  | H12 | 0.00055264623067 |
| H5  | H12 | 0.0067592507316  |
| O6  | H12 | 0.00066933093764 |
| H7  | H12 | 6.3957825433e-05 |
| C8  | H12 | 0.94439684422    |
| H9  | H12 | 0.010746628114   |
| C1  | H12 | 0.0035139214251  |
| C11 | H12 | 0.041270456146   |
| C1  | H13 | 0.042104018929   |
| C2  | H13 | 0.0079940404302  |
| C3  | H13 | 0.00064259255201 |
| H4  | H13 | 0.0067651946843  |
| H5  | H13 | 0.00055161247769 |
| O6  | H13 | 0.00066880281749 |
| H7  | H13 | 6.3827641414e-05 |
| C8  | H13 | 0.94427847518    |
| H9  | H13 | 0.0035160664327  |
| C1  | H13 | 0.010747205833   |
| C11 | H13 | 0.041321227262   |
| H12 | H13 | 0.044685797992   |

|     |     |                  |
|-----|-----|------------------|
| C1  | C14 | 0.0088543890811  |
| C2  | C14 | 0.0015423287932  |
| C3  | C14 | 0.00028503497322 |
| H4  | C14 | 4.7208686934e-05 |
| H5  | C14 | 4.717941468e-05  |
| O6  | C14 | 5.9402260239e-05 |
| H7  | C14 | 0.00010548798312 |
| C8  | C14 | 0.042494995446   |
| H9  | C14 | 0.00079638023563 |
| C1  | C14 | 0.00079706421774 |
| C11 | C14 | 0.96562569699    |
| H12 | C14 | 0.0076802474631  |
| H13 | C14 | 0.0076842816215  |
| C1  | H15 | 0.0077466988022  |
| C2  | H15 | 0.00082170727973 |
| C3  | H15 | 4.8918265331e-05 |
| H4  | H15 | 4.5334327283e-05 |
| H5  | H15 | 0.00035968782941 |
| O6  | H15 | 3.9908158314e-05 |
| H7  | H15 | 1.493995084e-05  |
| C8  | H15 | 0.041721328547   |
| H9  | H15 | 0.0071286242888  |
| C1  | H15 | 0.00057348028987 |
| C11 | H15 | 0.94384669811    |
| H12 | H15 | 0.011029254783   |
| H13 | H15 | 0.0036440414158  |
| C14 | H15 | 0.041348196352   |
| C1  | H16 | 0.0077515647012  |
| C2  | H16 | 0.00082108052786 |
| C3  | H16 | 4.8912674465e-05 |
| H4  | H16 | 0.00035980432533 |
| H5  | H16 | 4.5299931335e-05 |
| O6  | H16 | 3.9864905492e-05 |
| H7  | H16 | 1.4939724898e-05 |
| C8  | H16 | 0.04176060042    |
| H9  | H16 | 0.00057279445316 |
| C1  | H16 | 0.0071271192106  |
| C11 | H16 | 0.94373109386    |
| H12 | H16 | 0.0036500092871  |
| H13 | H16 | 0.011029403606   |
| C14 | H16 | 0.041345510864   |
| H15 | H16 | 0.044100053299   |
| C1  | C17 | 0.0015410986387  |
| C2  | C17 | 0.00031032097248 |
| C3  | C17 | 8.5001794776e-05 |
| H4  | C17 | 1.349615466e-05  |
| H5  | C17 | 1.3473211761e-05 |
| O6  | C17 | 1.6801779649e-05 |

|     |     |                  |
|-----|-----|------------------|
| H7  | C17 | 2.8175559889e-05 |
| C8  | C17 | 0.0091476532974  |
| H9  | C17 | 4.8942118945e-05 |
| C1  | C17 | 4.8993871311e-05 |
| C11 | C17 | 0.044289737682   |
| H12 | C17 | 0.00085260166383 |
| H13 | C17 | 0.00085392063227 |
| C14 | C17 | 0.9775834358     |
| H15 | C17 | 0.0079808124618  |
| H16 | C17 | 0.0079904733636  |
| C1  | H18 | 0.00083815698028 |
| C2  | H18 | 5.086814332e-05  |
| C3  | H18 | 1.0334888336e-05 |
| H4  | H18 | 4.6102161947e-06 |
| H5  | H18 | 1.7101848559e-05 |
| O6  | H18 | 1.0810036072e-05 |
| H7  | H18 | 2.2931252728e-06 |
| C8  | H18 | 0.0076447280457  |
| H9  | H18 | 0.00038532103521 |
| C1  | H18 | 4.8958722911e-05 |
| C11 | H18 | 0.04216534719    |
| H12 | H18 | 0.0075018895273  |
| H13 | H18 | 0.00061162505192 |
| C14 | H18 | 0.94838463145    |
| H15 | H18 | 0.011201137243   |
| H16 | H18 | 0.0036693073154  |
| C17 | H18 | 0.043845890352   |
| C1  | H19 | 0.00083781408698 |
| C2  | H19 | 5.085104969e-05  |
| C3  | H19 | 1.0328064388e-05 |
| H4  | H19 | 1.7120014114e-05 |
| H5  | H19 | 4.6045444367e-06 |
| O6  | H19 | 1.0792514167e-05 |
| H7  | H19 | 2.2925787155e-06 |
| C8  | H19 | 0.0076409135269  |
| H9  | H19 | 4.8944719133e-05 |
| C1  | H19 | 0.0003853609538  |
| C11 | H19 | 0.042184572751   |
| H12 | H19 | 0.00061087731258 |
| H13 | H19 | 0.007505042425   |
| C14 | H19 | 0.94825026831    |
| H15 | H19 | 0.0036705002617  |
| H16 | H19 | 0.011201399176   |
| C17 | H19 | 0.043853194212   |
| H18 | H19 | 0.044515206802   |
| C1  | C2  | 5.9900449608e-05 |
| C2  | C2  | 1.4722854526e-05 |
| C3  | C2  | 3.5083007749e-06 |

|     |     |                  |
|-----|-----|------------------|
| H4  | C2  | 3.1448367675e-06 |
| H5  | C2  | 8.5421059116e-07 |
| O6  | C2  | 2.7164851604e-06 |
| H7  | C2  | 1.0476108953e-06 |
| C8  | C2  | 0.00077424628159 |
| H9  | C2  | 4.5779135901e-06 |
| C1  | C2  | 1.7394290868e-05 |
| C11 | C2  | 0.0071185683785  |
| H12 | C2  | 4.9746925782e-05 |
| H13 | C2  | 0.00038439952051 |
| C14 | C2  | 0.041721727761   |
| H15 | C2  | 0.00056347807475 |
| H16 | C2  | 0.0067104112391  |
| C17 | C2  | 0.96293955209    |
| H18 | C2  | 0.0037008421684  |
| H19 | C2  | 0.011569213699   |
| C1  | H21 | 0.00036819099769 |
| C2  | H21 | 0.00011566540621 |
| C3  | H21 | 2.7332962997e-05 |
| H4  | H21 | 3.4185992823e-06 |
| H5  | H21 | 3.4141317984e-06 |
| O6  | H21 | 5.6822053984e-06 |
| H7  | H21 | 1.0555545511e-05 |
| C8  | H21 | 0.0018826302539  |
| H9  | H21 | 1.3828494868e-05 |
| C1  | H21 | 1.3847458546e-05 |
| C11 | H21 | 0.010351292608   |
| H12 | H21 | 5.1277699969e-05 |
| H13 | H21 | 5.1304913381e-05 |
| C14 | H21 | 0.042338675551   |
| H15 | H21 | 0.00086213361967 |
| H16 | H21 | 0.00086307060242 |
| C17 | H21 | 0.96674339315    |
| H18 | H21 | 0.003905353779   |
| H19 | H21 | 0.0039125544376  |
| C2  | H21 | 0.04436295249    |
| C1  | H22 | 5.991214045e-05  |
| C2  | H22 | 1.4738178608e-05 |
| C3  | H22 | 3.5110555713e-06 |
| H4  | H22 | 8.5489609384e-07 |
| H5  | H22 | 3.1449420899e-06 |
| O6  | H22 | 2.7190043859e-06 |
| H7  | H22 | 1.0481944031e-06 |
| C8  | H22 | 0.0007755934964  |
| H9  | H22 | 1.7408968725e-05 |
| C1  | H22 | 4.5843661083e-06 |
| C11 | H22 | 0.007134281105   |
| H12 | H22 | 0.00038449033084 |

|     |     |                  |
|-----|-----|------------------|
| H13 | H22 | 4.9781009409e-05 |
| C14 | H22 | 0.041690975568   |
| H15 | H22 | 0.0067174032255  |
| H16 | H22 | 0.00056436709063 |
| C17 | H22 | 0.96288107216    |
| H18 | H22 | 0.011570044807   |
| H19 | H22 | 0.0036935885894  |
| C2  | H22 | 0.044856111356   |
| H21 | H22 | 0.044362641899   |

## BUTANAL

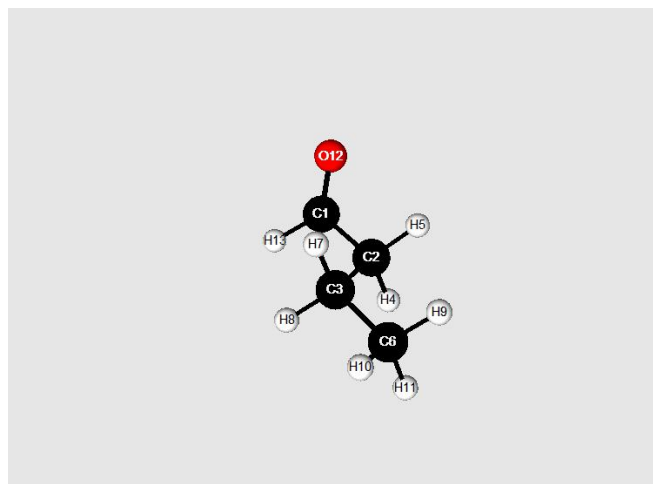

## HARTREE-FOCK

| Atom A | Atom B | Delocalization index |
|--------|--------|----------------------|
| C1     | C2     | 0.93322863205        |
| C1     | C3     | 0.047873362032       |
| C2     | C3     | 0.96222793506        |
| C1     | H4     | 0.04986904526        |
| C2     | H4     | 0.94268635258        |
| C3     | H4     | 0.038882977163       |
| C1     | H5     | 0.037047741075       |
| C2     | H5     | 0.94341499941        |
| C3     | H5     | 0.036089007753       |
| H4     | H5     | 0.038242484605       |
| C1     | C6     | 0.0093022975115      |
| C2     | C6     | 0.045786716662       |
| C3     | C6     | 0.97761766224        |
| H4     | C6     | 0.0082995356213      |
| H5     | C6     | 0.0066506060367      |
| C1     | H7     | 0.0057786270909      |
| C2     | H7     | 0.043682519065       |
| C3     | H7     | 0.95049947072        |
| H4     | H7     | 0.011055590815       |
| H5     | H7     | 0.0034401799172      |
| C6     | H7     | 0.042180222676       |
| C1     | H8     | 0.007764833732       |
| C2     | H8     | 0.04349341449        |
| C3     | H8     | 0.94927632983        |
| H4     | H8     | 0.0034709479514      |
| H5     | H8     | 0.010496272118       |
| C6     | H8     | 0.042735669963       |
| H7     | H8     | 0.042871146867       |
| C1     | H9     | 0.00074974684728     |
| C2     | H9     | 0.0073519784903      |

|     |     |                  |
|-----|-----|------------------|
| C3  | H9  | 0.042042183161   |
| H4  | H9  | 0.00053464460538 |
| H5  | H9  | 0.0055121707065  |
| C6  | H9  | 0.96244117025    |
| H7  | H9  | 0.0035452623049  |
| H8  | H9  | 0.01133757411    |
| C1  | C1  | 0.0018807573112  |
| C2  | C1  | 0.010522493775   |
| C3  | C1  | 0.04245409796    |
| H4  | C1  | 0.00088131314112 |
| H5  | C1  | 0.00069054009525 |
| C6  | C1  | 0.96558271596    |
| H7  | C1  | 0.0037836292581  |
| H8  | C1  | 0.0037850926112  |
| H9  | C1  | 0.0432715371     |
| C1  | H11 | 0.00071525074317 |
| C2  | H11 | 0.0073457912084  |
| C3  | H11 | 0.042340564574   |
| H4  | H11 | 0.0063835403322  |
| H5  | H11 | 0.00046043047235 |
| C6  | H11 | 0.96258892853    |
| H7  | H11 | 0.011390928615   |
| H8  | H11 | 0.0036974119947  |
| H9  | H11 | 0.044023767424   |
| C1  | H11 | 0.043410856958   |
| C1  | O12 | 1.3162970241     |
| C2  | O12 | 0.1175307335     |
| C3  | O12 | 0.01770390702    |
| H4  | O12 | 0.018948313297   |
| H5  | O12 | 0.020584707102   |
| C6  | O12 | 0.0029275344798  |
| H7  | O12 | 0.0035447544394  |
| H8  | O12 | 0.0020367861009  |
| H9  | O12 | 0.00016405577746 |
| C1  | O12 | 0.00081576969774 |
| H11 | O12 | 0.0004224960706  |
| C1  | H13 | 0.88500249439    |
| C2  | H13 | 0.04832776128    |
| C3  | H13 | 0.0067023140441  |
| H4  | H13 | 0.0031606960322  |
| H5  | H13 | 0.0093000294483  |
| C6  | H13 | 0.001027200956   |
| H7  | H13 | 0.00057074942372 |
| H8  | H13 | 0.0073880487173  |
| H9  | H13 | 0.00038149448866 |
| C1  | H13 | 0.00010376726693 |
| H11 | H13 | 6.1048876222e-05 |
| O12 | H13 | 0.12587365965    |





## HEXANAL

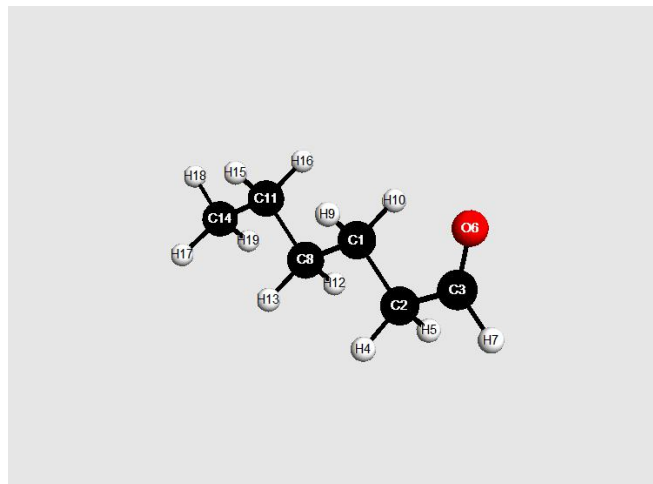

## HARTREE-FOCK

| Atom A | Atom B | Delocalization index |
|--------|--------|----------------------|
| C1     | C2     | 0.96811600605        |
| C1     | C3     | 0.033785953006       |
| C2     | C3     | 0.9387006461         |
| C1     | H4     | 0.03660989214        |
| C2     | H4     | 0.94042552938        |
| C3     | H4     | 0.051920774093       |
| C1     | H5     | 0.036555071855       |
| C2     | H5     | 0.94043805781        |
| C3     | H5     | 0.051928953318       |
| H4     | H5     | 0.042277212214       |
| C1     | O6     | 0.028896183799       |
| C2     | O6     | 0.11203331013        |
| C3     | O6     | 1.311693148          |
| H4     | O6     | 0.018551663529       |
| H5     | O6     | 0.018551506425       |
| C1     | H7     | 0.0081608845168      |
| C2     | H7     | 0.049999381933       |
| C3     | H7     | 0.88890183474        |
| H4     | H7     | 0.0039106555963      |
| H5     | H7     | 0.0039111425473      |
| O6     | H7     | 0.1256833559         |
| C1     | C8     | 0.96638943645        |
| C2     | C8     | 0.045661136181       |
| C3     | C8     | 0.0079310133902      |
| H4     | C8     | 0.0070882397021      |
| H5     | C8     | 0.0070971573332      |
| O6     | C8     | 0.0035128849125      |
| H7     | C8     | 0.0014315184823      |
| C1     | H9     | 0.94178813416        |
| C2     | H9     | 0.042918969372       |

|     |     |                  |
|-----|-----|------------------|
| C3  | H9  | 0.0036898848209  |
| H4  | H9  | 0.0032669047454  |
| H5  | H9  | 0.010538905467   |
| O6  | H9  | 0.013428801931   |
| H7  | H9  | 0.00047615413723 |
| C8  | H9  | 0.039240872664   |
| C1  | C1  | 0.94164311939    |
| C2  | C1  | 0.042949981459   |
| C3  | C1  | 0.0036895854613  |
| H4  | C1  | 0.010538871296   |
| H5  | C1  | 0.0032666720017  |
| O6  | C1  | 0.013429018002   |
| H7  | C1  | 0.00047614438475 |
| C8  | C1  | 0.039215356693   |
| H9  | C1  | 0.041003489903   |
| C1  | C11 | 0.042408685265   |
| C2  | C11 | 0.0090725592219  |
| C3  | C11 | 0.0014617604864  |
| H4  | C11 | 0.00075993374931 |
| H5  | C11 | 0.00076037532224 |
| O6  | C11 | 0.00022662491531 |
| H7  | C11 | 0.00046694832863 |
| C8  | C11 | 0.96534675695    |
| H9  | C11 | 0.0073643363439  |
| C1  | C11 | 0.0073536758964  |
| C1  | H12 | 0.042065514532   |
| C2  | H12 | 0.0079797407013  |
| C3  | H12 | 0.00064071913819 |
| H4  | H12 | 0.00055109896936 |
| H5  | H12 | 0.0067443173235  |
| O6  | H12 | 0.00066974561858 |
| H7  | H12 | 6.3808909705e-05 |
| C8  | H12 | 0.94441526056    |
| H9  | H12 | 0.010759347118   |
| C1  | H12 | 0.003513100479   |
| C11 | H12 | 0.041458180111   |
| C1  | H13 | 0.042132650866   |
| C2  | H13 | 0.0079824360305  |
| C3  | H13 | 0.00064084837976 |
| H4  | H13 | 0.006745144964   |
| H5  | H13 | 0.00055116995037 |
| O6  | H13 | 0.00066979655539 |
| H7  | H13 | 6.3832894826e-05 |
| C8  | H13 | 0.94426617404    |
| H9  | H13 | 0.0035121621182  |
| C1  | H13 | 0.010759451701   |
| C11 | H13 | 0.041446448743   |
| H12 | H13 | 0.044722567857   |

|     |     |                  |
|-----|-----|------------------|
| C1  | C14 | 0.0091272618869  |
| C2  | C14 | 0.0015883568951  |
| C3  | C14 | 0.00029557411722 |
| H4  | C14 | 4.9319641363e-05 |
| H5  | C14 | 4.9317295695e-05 |
| O6  | C14 | 6.2256341218e-05 |
| H7  | C14 | 0.00010888449312 |
| C8  | C14 | 0.044555011382   |
| H9  | C14 | 0.00081080361183 |
| C1  | C14 | 0.00081066648062 |
| C11 | C14 | 0.97775766792    |
| H12 | C14 | 0.0080533577053  |
| H13 | C14 | 0.0080515607511  |
| C1  | H15 | 0.0077215075854  |
| C2  | H15 | 0.00082592616497 |
| C3  | H15 | 4.945877059e-05  |
| H4  | H15 | 4.5328394407e-05 |
| H5  | H15 | 0.00036064672913 |
| O6  | H15 | 4.2217552737e-05 |
| H7  | H15 | 1.541795426e-05  |
| C8  | H15 | 0.042191185768   |
| H9  | H15 | 0.0070983486055  |
| C1  | H15 | 0.00057151113073 |
| C11 | H15 | 0.94812879383    |
| H12 | H15 | 0.011205845351   |
| H13 | H15 | 0.0036752080316  |
| C14 | H15 | 0.043553393057   |
| C1  | H16 | 0.0077197525748  |
| C2  | H16 | 0.00082605523563 |
| C3  | H16 | 4.9460827201e-05 |
| H4  | H16 | 0.00036065612799 |
| H5  | H16 | 4.5326497172e-05 |
| O6  | H16 | 4.2219732895e-05 |
| H7  | H16 | 1.5418755339e-05 |
| C8  | H16 | 0.04216334441    |
| H9  | H16 | 0.00057158571672 |
| C1  | H16 | 0.0070980425713  |
| C11 | H16 | 0.94799141434    |
| H12 | H16 | 0.0036745558544  |
| H13 | H16 | 0.011205927901   |
| C14 | H16 | 0.043556034355   |
| H15 | H16 | 0.043996095719   |
| C1  | H17 | 0.00078477098941 |
| C2  | H17 | 6.2290983836e-05 |
| C3  | H17 | 1.2040634127e-05 |
| H4  | H17 | 1.747137968e-05  |
| H5  | H17 | 4.4823320107e-06 |
| O6  | H17 | 1.0492425141e-05 |

|     |     |                  |
|-----|-----|------------------|
| H7  | H17 | 3.2399849718e-06 |
| C8  | H17 | 0.0071283378782  |
| H9  | H17 | 4.7104452642e-05 |
| C1  | H17 | 0.00037314625904 |
| C11 | H17 | 0.041787229142   |
| H12 | H17 | 0.00057041981782 |
| H13 | H17 | 0.0067720495977  |
| C14 | H17 | 0.96307095875    |
| H15 | H17 | 0.0036820965985  |
| H16 | H17 | 0.011536191326   |
| C1  | H18 | 0.0018559835786  |
| C2  | H18 | 0.00038151409506 |
| C3  | H18 | 0.00010695380991 |
| H4  | H18 | 1.4083350956e-05 |
| H5  | H18 | 1.4083387093e-05 |
| O6  | H18 | 2.1323416394e-05 |
| H7  | H18 | 3.5366503808e-05 |
| C8  | H18 | 0.010364514315   |
| H9  | H18 | 4.9116185711e-05 |
| C1  | H18 | 4.9115113198e-05 |
| C11 | H18 | 0.042182469119   |
| H12 | H18 | 0.00087361752456 |
| H13 | H18 | 0.00087362783996 |
| C14 | H18 | 0.96639622615    |
| H15 | H18 | 0.0038702302683  |
| H16 | H18 | 0.0038712426733  |
| H17 | H18 | 0.044323605201   |
| C1  | H19 | 0.00078510047448 |
| C2  | H19 | 6.2284779888e-05 |
| C3  | H19 | 1.2044489069e-05 |
| H4  | H19 | 4.4830526315e-06 |
| H5  | H19 | 1.7475246462e-05 |
| O6  | H19 | 1.049469497e-05  |
| H7  | H19 | 3.2403432617e-06 |
| C8  | H19 | 0.0071404507623  |
| H9  | H19 | 0.00037320010043 |
| C1  | H19 | 4.7111436016e-05 |
| C11 | H19 | 0.041801249112   |
| H12 | H19 | 0.0067740674373  |
| H13 | H19 | 0.00057050304157 |
| C14 | H19 | 0.96308150675    |
| H15 | H19 | 0.011536383607   |
| H16 | H19 | 0.0036812949706  |
| H17 | H19 | 0.044992769046   |
| H18 | H19 | 0.044323664505   |

## ACETALDEHYDE

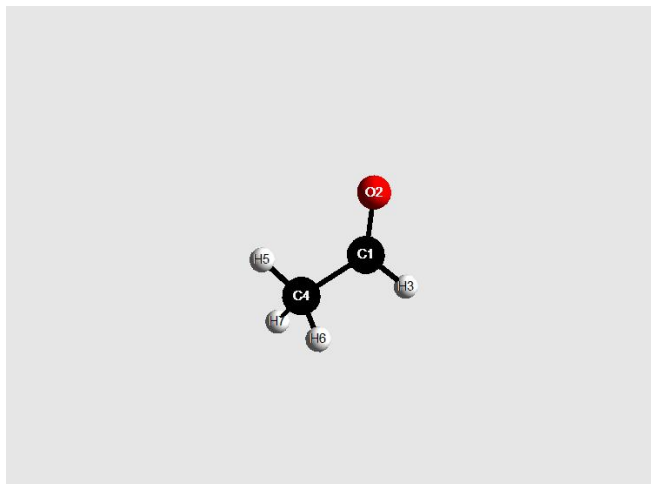

### HARTREE-FOCK

| Atom A | Atom B | Delocalization index |
|--------|--------|----------------------|
| C1     | O2     | 1.3130845882         |
| C1     | H3     | 0.88846294786        |
| O2     | H3     | 0.12593363207        |
| C1     | C4     | 0.94900733597        |
| O2     | C4     | 0.12346539626        |
| H3     | C4     | 0.050413791328       |
| C1     | H5     | 0.036528191666       |
| O2     | H5     | 0.018994172412       |
| H3     | H5     | 0.0097973367927      |
| C4     | H5     | 0.95892616123        |
| C1     | H6     | 0.048081108348       |
| O2     | H6     | 0.01978543283        |
| H3     | H6     | 0.0032434743867      |
| C4     | H6     | 0.95999202852        |
| H5     | H6     | 0.037258113249       |
| C1     | H7     | 0.048084112348       |
| O2     | H7     | 0.019785453111       |
| H3     | H7     | 0.0032434591698      |
| C4     | H7     | 0.95996480532        |
| H5     | H7     | 0.037258019431       |
| H6     | H7     | 0.040866084843       |

### CCSD

| Atom A | Atom B | Delocalization index |
|--------|--------|----------------------|
| C1     | O2     | 1.2267879108         |
| C1     | H3     | 0.76810100126        |
| O2     | H3     | 0.093837385573       |
| C1     | C4     | 0.82780145501        |
| O2     | C4     | 0.094924885562       |
| H3     | C4     | 0.040859200554       |

|    |    |                 |
|----|----|-----------------|
| C1 | H5 | 0.028944914543  |
| O2 | H5 | 0.018970060247  |
| H3 | H5 | 0.0082040250611 |
| C4 | H5 | 0.8241241117    |
| C1 | H6 | 0.037102417358  |
| O2 | H6 | 0.015516151187  |
| H3 | H6 | 0.0030399655097 |
| C4 | H6 | 0.82535068902   |
| H5 | H6 | 0.029205868114  |
| C1 | H7 | 0.037099378201  |
| O2 | H7 | 0.015516191791  |
| H3 | H7 | 0.0030399072983 |
| C4 | H7 | 0.82540854905   |
| H5 | H7 | 0.029205750793  |
| H6 | H7 | 0.03219956526   |

## FORMALDEHYDE

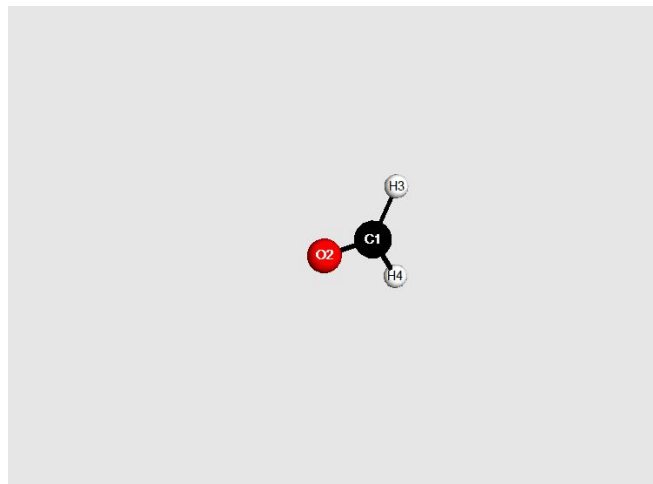

### HARTREE-FOCK

| Atom A | Atom B | Delocalization index |
|--------|--------|----------------------|
| C1     | O2     | 1.3790605198         |
| C1     | H3     | 0.89799032154        |
| O2     | H3     | 0.12366100364        |
| C1     | H4     | 0.89800781294        |
| O2     | H4     | 0.12366118646        |
| H3     | H4     | 0.051065704385       |

### CCSD

| Atom A | Atom B | Delocalization index |
|--------|--------|----------------------|
| C1     | O2     | 1.2708393877         |
| C1     | H3     | 0.77791292086        |
| O2     | H3     | 0.09135772778        |
| C1     | H4     | 0.77791732583        |
| O2     | H4     | 0.091357747811       |
| H3     | H4     | 0.040567849341       |



## DIMETHYL KETONE

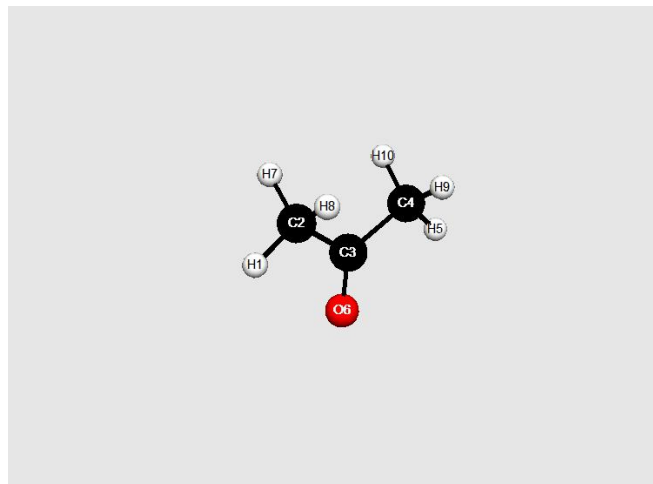

## HARTREE-FOCK

| Atom A | Atom B | Delocalization index |
|--------|--------|----------------------|
| H1     | C2     | 0.95815174929        |
| H1     | C3     | 0.034763198405       |
| C2     | C3     | 0.9324659071         |
| H1     | C4     | 0.0083026787698      |
| C2     | C4     | 0.051261890499       |
| C3     | C4     | 0.93230026174        |
| H1     | H5     | 0.0019861849541      |
| C2     | H5     | 0.0082992419401      |
| C3     | H5     | 0.034728342779       |
| C4     | H5     | 0.95829010583        |
| H1     | O6     | 0.021023212796       |
| C2     | O6     | 0.12526250431        |
| C3     | O6     | 1.2686877879         |
| C4     | O6     | 0.12521064168        |
| H5     | O6     | 0.020958889244       |
| H1     | H7     | 0.037610107782       |
| C2     | H7     | 0.9607464651         |
| C3     | H7     | 0.044290186938       |
| C4     | H7     | 0.0065910019256      |
| H5     | H7     | 0.0006645347904      |
| O6     | H7     | 0.018329607296       |
| H1     | H8     | 0.037627376138       |
| C2     | H8     | 0.96070534948        |
| C3     | H8     | 0.044276021467       |
| C4     | H8     | 0.0066444049352      |
| H5     | H8     | 0.00068910306623     |
| O6     | H8     | 0.018327824754       |
| H7     | H8     | 0.041600392805       |
| H1     | H9     | 0.00065944499946     |
| C2     | H9     | 0.0065037486687      |

|    |    |                  |
|----|----|------------------|
| C3 | H9 | 0.044447958897   |
| C4 | H9 | 0.96055872205    |
| H5 | H9 | 0.037622941807   |
| O6 | H9 | 0.018401894626   |
| H7 | H9 | 0.00054749484171 |
| H8 | H9 | 0.0052012992917  |
| H1 | H1 | 0.00069588681549 |
| C2 | H1 | 0.006740745849   |
| C3 | H1 | 0.044123458814   |
| C4 | H1 | 0.96080619273    |
| H5 | H1 | 0.037616864161   |
| O6 | H1 | 0.018231620753   |
| H7 | H1 | 0.0053367783502  |
| H8 | H1 | 0.00054864592525 |
| H9 | H1 | 0.041593606139   |

### CCSD

| Atom A | Atom B | Delocalization index |
|--------|--------|----------------------|
| H1     | C2     | 0.82364674094        |
| H1     | C3     | 0.027351125434       |
| C2     | C3     | 0.81062837905        |
| H1     | C4     | 0.0067928158705      |
| C2     | C4     | 0.043688438869       |
| C3     | C4     | 0.81037779764        |
| H1     | H5     | 0.0018416930879      |
| C2     | H5     | 0.0068007048853      |
| C3     | H5     | 0.02730411536        |
| C4     | H5     | 0.8235939327         |
| H1     | O6     | 0.020512270264       |
| C2     | O6     | 0.096257917139       |
| C3     | O6     | 1.1908044341         |
| C4     | O6     | 0.096209065593       |
| H5     | O6     | 0.02051202675        |
| H1     | H7     | 0.029417361568       |
| C2     | H7     | 0.82511143468        |
| C3     | H7     | 0.03397793624        |
| C4     | H7     | 0.0060793657055      |
| H5     | H7     | 0.00060113143955     |
| O6     | H7     | 0.014384817196       |
| H1     | H8     | 0.029420321406       |
| C2     | H8     | 0.82529803225        |
| C3     | H8     | 0.033901611035       |
| C4     | H8     | 0.0061792006472      |
| H5     | H8     | 0.00062245289226     |
| O6     | H8     | 0.014357012306       |
| H7     | H8     | 0.032640420964       |
| H1     | H9     | 0.00059940882362     |
| C2     | H9     | 0.0060757385143      |

|    |    |                  |
|----|----|------------------|
| C3 | H9 | 0.034020615973   |
| C4 | H9 | 0.825033107      |
| H5 | H9 | 0.029424826649   |
| O6 | H9 | 0.014404930805   |
| H7 | H9 | 0.00050730731201 |
| H8 | H9 | 0.0055662904808  |
| H1 | H1 | 0.00062424187843 |
| C2 | H1 | 0.0062282019766  |
| C3 | H1 | 0.033843806592   |
| C4 | H1 | 0.82523617359    |
| H5 | H1 | 0.029413503694   |
| O6 | H1 | 0.014337042714   |
| H7 | H1 | 0.0056204876038  |
| H8 | H1 | 0.00051569119157 |
| H9 | H1 | 0.032640861238   |

## PIVALDEHYDE

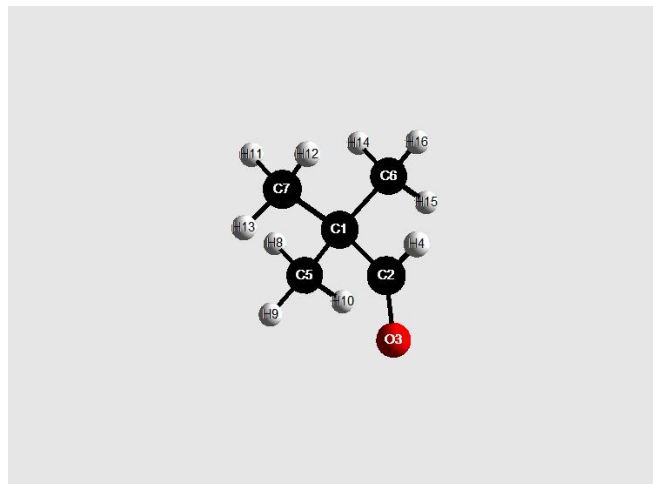

## HARTREE-FOCK

| Atom A | Atom B | Delocalization index |
|--------|--------|----------------------|
| C1     | C2     | 0.90584702489        |
| C1     | O3     | 0.10453246003        |
| C2     | O3     | 1.3013679738         |
| C1     | H4     | 0.046532769125       |
| C2     | H4     | 0.87746700158        |
| O3     | H4     | 0.12417883438        |
| C1     | C5     | 0.95873964315        |
| C2     | C5     | 0.035280814401       |
| O3     | C5     | 0.034497629707       |
| H4     | C5     | 0.0078037452263      |
| C1     | C6     | 0.95034047737        |
| C2     | C6     | 0.054758620083       |
| O3     | C6     | 0.017150351835       |
| H4     | C6     | 0.0082434950859      |
| C5     | C6     | 0.043836093404       |
| C1     | C7     | 0.95033280284        |
| C2     | C7     | 0.054728288184       |
| O3     | C7     | 0.017146183256       |
| H4     | C7     | 0.0082396196302      |
| C5     | C7     | 0.043775131066       |
| C6     | C7     | 0.045533649809       |
| C1     | H8     | 0.0413608193         |
| C2     | H8     | 0.0087572130131      |
| O3     | H8     | 0.0039577041546      |
| H4     | H8     | 0.0019600979843      |
| C5     | H8     | 0.95897453715        |
| C6     | H8     | 0.0076427873558      |
| C7     | H8     | 0.0076381051378      |
| C1     | H9     | 0.038956606281       |
| C2     | H9     | 0.0034849583543      |

|     |     |                  |
|-----|-----|------------------|
| O3  | H9  | 0.014187780385   |
| H4  | H9  | 0.00048714656334 |
| C5  | H9  | 0.9539151348     |
| C6  | H9  | 0.0096172105113  |
| C7  | H9  | 0.0074829817909  |
| H8  | H9  | 0.041333386674   |
| C1  | C1  | 0.038881657398   |
| C2  | C1  | 0.003489263804   |
| O3  | C1  | 0.014188224146   |
| H4  | C1  | 0.00048715276271 |
| C5  | C1  | 0.95405612078    |
| C6  | C1  | 0.0074965192566  |
| C7  | C1  | 0.0096152641039  |
| H8  | C1  | 0.041333293239   |
| H9  | C1  | 0.039925446061   |
| C1  | H11 | 0.039044505527   |
| C2  | H11 | 0.010226761794   |
| O3  | H11 | 0.0037971079836  |
| H4  | H11 | 0.0010314266812  |
| C5  | H11 | 0.0070264455754  |
| C6  | H11 | 0.0084585041233  |
| C7  | H11 | 0.95533723143    |
| H8  | H11 | 0.0061165267388  |
| H9  | H11 | 0.00047053094697 |
| C1  | H11 | 0.00070671316106 |
| C1  | H12 | 0.039062380856   |
| C2  | H12 | 0.0082529226362  |
| O3  | H12 | 0.0019928343088  |
| H4  | H12 | 0.0082135848801  |
| C5  | H12 | 0.0096277398535  |
| C6  | H12 | 0.0075816787433  |
| C7  | H12 | 0.95840456307    |
| H8  | H12 | 0.00073581943052 |
| H9  | H12 | 0.0007092957761  |
| C1  | H12 | 0.0025634412912  |
| H11 | H12 | 0.042087561256   |
| C1  | H13 | 0.039002620751   |
| C2  | H13 | 0.00562202132    |
| O3  | H13 | 0.0034622536531  |
| H4  | H13 | 0.00050723398261 |
| C5  | H13 | 0.0077872132005  |
| C6  | H13 | 0.0099645334229  |
| C7  | H13 | 0.95976761438    |
| H8  | H13 | 0.00052257745579 |
| H9  | H13 | 0.0064794992763  |
| C1  | H13 | 0.00075386602253 |
| H11 | H13 | 0.041404276256   |
| H12 | H13 | 0.04169845153    |

|     |     |                  |
|-----|-----|------------------|
| C1  | H14 | 0.039047812018   |
| C2  | H14 | 0.010230606295   |
| O3  | H14 | 0.0037971229953  |
| H4  | H14 | 0.0010315425025  |
| C5  | H14 | 0.0070173890267  |
| C6  | H14 | 0.95536378877    |
| C7  | H14 | 0.0084583541125  |
| H8  | H14 | 0.0061169168103  |
| H9  | H14 | 0.0007067463517  |
| C1  | H14 | 0.00047051288603 |
| H11 | H14 | 0.0068648837709  |
| H12 | H14 | 0.00055420410022 |
| H13 | H14 | 0.00077564846116 |
| C1  | H15 | 0.03897456577    |
| C2  | H15 | 0.0056208378546  |
| O3  | H15 | 0.0034623897127  |
| H4  | H15 | 0.0005072804662  |
| C5  | H15 | 0.0078228717367  |
| C6  | H15 | 0.95985113286    |
| C7  | H15 | 0.009966842415   |
| H8  | H15 | 0.00052260933836 |
| H9  | H15 | 0.00075390960154 |
| C1  | H15 | 0.0064794133567  |
| H11 | H15 | 0.00077562549268 |
| H12 | H15 | 0.00074764493734 |
| H13 | H15 | 0.0026098442752  |
| H14 | H15 | 0.041403504974   |
| C1  | H16 | 0.039066190892   |
| C2  | H16 | 0.0082702109106  |
| O3  | H16 | 0.0019926851827  |
| H4  | H16 | 0.0082133110935  |
| C5  | H16 | 0.0096299053872  |
| C6  | H16 | 0.95837275221    |
| C7  | H16 | 0.0075950192244  |
| H8  | H16 | 0.00073586433875 |
| H9  | H16 | 0.002563441861   |
| C1  | H16 | 0.00070925720409 |
| H11 | H16 | 0.00055418508208 |
| H12 | H16 | 0.0065999695205  |
| H13 | H16 | 0.00074763237308 |
| H14 | H16 | 0.0420872053     |
| H15 | H16 | 0.041697715349   |

# ALKANES

## PROPANE

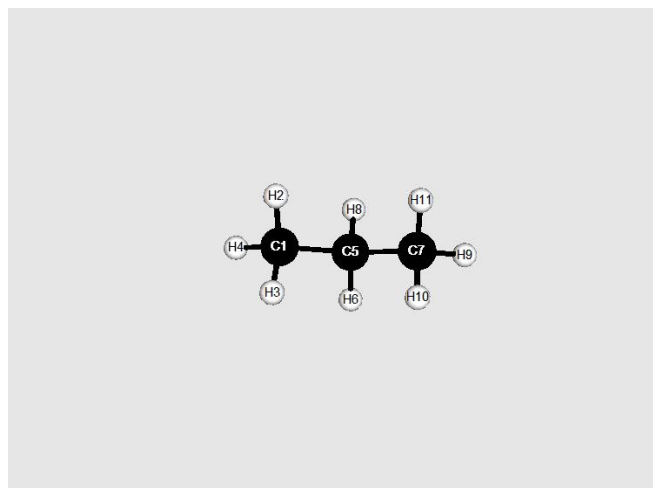

### HARTREE-FOCK

| Atom A | Atom B | Delocalization index |
|--------|--------|----------------------|
| C1     | H2     | 0.96306860574        |
| C1     | H3     | 0.96306919981        |
| H2     | H3     | 0.04463244922        |
| C1     | H4     | 0.96678358027        |
| H2     | H4     | 0.044054363231       |
| H3     | H4     | 0.04405428833        |
| C1     | C5     | 0.97872663269        |
| H2     | C5     | 0.041641807837       |
| H3     | C5     | 0.041679841489       |
| H4     | C5     | 0.042025064344       |
| C1     | H6     | 0.044198132821       |
| H2     | H6     | 0.011760187943       |
| H3     | H6     | 0.0036990294686      |
| H4     | H6     | 0.0038671509385      |
| C5     | H6     | 0.95231984758        |
| C1     | C7     | 0.046282755366       |
| H2     | C7     | 0.0074034787909      |
| H3     | C7     | 0.0074201088701      |
| H4     | C7     | 0.01070963446        |
| C5     | C7     | 0.97875583771        |
| H6     | C7     | 0.044220957618       |
| C1     | H8     | 0.044211791902       |
| H2     | H8     | 0.0036990204158      |
| H3     | H8     | 0.011760171585       |
| H4     | H8     | 0.0038672042324      |
| C5     | H8     | 0.95219038502        |
| H6     | H8     | 0.043964373703       |
| C7     | H8     | 0.044212471313       |

|    |     |                  |
|----|-----|------------------|
| C1 | H9  | 0.010706929043   |
| H2 | H9  | 0.00081188893962 |
| H3 | H9  | 0.00081195903789 |
| H4 | H9  | 0.0023272657636  |
| C5 | H9  | 0.042015702455   |
| H6 | H9  | 0.0038670617269  |
| C7 | H9  | 0.96683321962    |
| H8 | H9  | 0.0038670533606  |
| C1 | C1  | 0.0074102759563  |
| H2 | C1  | 0.00052015775475 |
| H3 | C1  | 0.0060681230495  |
| H4 | C1  | 0.00081189364638 |
| C5 | C1  | 0.041685917194   |
| H6 | C1  | 0.0036991103427  |
| C7 | C1  | 0.96311553111    |
| H8 | C1  | 0.01176020523    |
| H9 | C1  | 0.044053954308   |
| C1 | H11 | 0.0074017040622  |
| H2 | H11 | 0.0060679909822  |
| H3 | H11 | 0.00052024525553 |
| H4 | H11 | 0.00081196489718 |
| C5 | H11 | 0.041636780928   |
| H6 | H11 | 0.011760185182   |
| C7 | H11 | 0.96307240601    |
| H8 | H11 | 0.0036989726702  |
| H9 | H11 | 0.044053859034   |
| C1 | H11 | 0.044632081626   |

### CCSD

| Atom A | Atom B | Delocalization index |
|--------|--------|----------------------|
| C1     | H2     | 0.82688113369        |
| C1     | H3     | 0.82687986306        |
| H2     | H3     | 0.034567833721       |
| C1     | H4     | 0.83143315133        |
| H2     | H4     | 0.034031544272       |
| H3     | H4     | 0.034030908823       |
| C1     | C5     | 0.84129840684        |
| H2     | C5     | 0.033015070828       |
| H3     | C5     | 0.033057500521       |
| H4     | C5     | 0.033197948339       |
| C1     | H6     | 0.035454006165       |
| H2     | H6     | 0.0093974215342      |
| H3     | H6     | 0.0032100442557      |
| H4     | H6     | 0.0033334787306      |
| C5     | H6     | 0.81703631628        |
| C1     | C7     | 0.040139759956       |
| H2     | C7     | 0.0070381882613      |
| H3     | C7     | 0.0070452621982      |



|    |     |                  |
|----|-----|------------------|
| H4 | C7  | 0.0083625646336  |
| C5 | C7  | 0.84126012076    |
| H6 | C7  | 0.035447486802   |
| C1 | H8  | 0.035436242522   |
| H2 | H8  | 0.0032099499409  |
| H3 | H8  | 0.0093973904652  |
| H4 | H8  | 0.0033335539144  |
| C5 | H8  | 0.81696119503    |
| H6 | H8  | 0.034101471869   |
| C7 | H8  | 0.035440459021   |
| C1 | H9  | 0.0083620702682  |
| H2 | H9  | 0.00074032173545 |
| H3 | H9  | 0.00074034671152 |
| H4 | H9  | 0.0021334703344  |
| C5 | H9  | 0.033188347037   |
| H6 | H9  | 0.0033334617802  |
| C7 | H9  | 0.83141307909    |
| H8 | H9  | 0.0033334515029  |
| C1 | C1  | 0.0070429609064  |
| H2 | C1  | 0.00055887148514 |
| H3 | C1  | 0.0069669083246  |
| H4 | C1  | 0.00074030370827 |
| C5 | C1  | 0.033056071838   |
| H6 | C1  | 0.0032100142601  |
| C7 | C1  | 0.8268632723     |
| H8 | C1  | 0.0093973996303  |
| H9 | C1  | 0.034030747735   |
| C1 | H11 | 0.0070408647949  |
| H2 | H11 | 0.0069668907282  |
| H3 | H11 | 0.00055895503653 |
| H4 | H11 | 0.00074034042816 |
| C5 | H11 | 0.033015001489   |
| H6 | H11 | 0.0093974214566  |
| C7 | H11 | 0.82688375414    |
| H8 | H11 | 0.0032100201005  |
| H9 | H11 | 0.034031370831   |
| C1 | H11 | 0.034567748078   |

## BUTANE

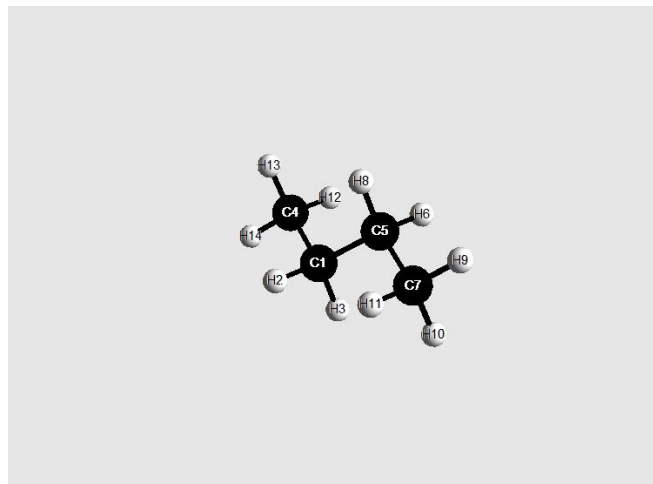

### HARTREE-FOCK

| Atom A | Atom B | Delocalization index |
|--------|--------|----------------------|
| C1     | H2     | 0.94815544477        |
| C1     | H3     | 0.94804306252        |
| H2     | H3     | 0.044091742162       |
| C1     | C4     | 0.97899515716        |
| H2     | C4     | 0.043782104201       |
| H3     | C4     | 0.043782081641       |
| C1     | C5     | 0.96634514078        |
| H2     | C5     | 0.041931218859       |
| H3     | C5     | 0.041990749791       |
| C4     | C5     | 0.044326978833       |
| C1     | H6     | 0.041931525814       |
| H2     | H6     | 0.011402703981       |
| H3     | H6     | 0.0036814389059      |
| C4     | H6     | 0.0079645872427      |
| C5     | H6     | 0.94814968601        |
| C1     | C7     | 0.044331601866       |
| H2     | C7     | 0.0079651035898      |
| H3     | C7     | 0.0079842533121      |
| C4     | C7     | 0.0094133429015      |
| C5     | C7     | 0.97899824314        |
| H6     | C7     | 0.04378189073        |
| C1     | H8     | 0.04198968573        |
| H2     | H8     | 0.0036816284037      |
| H3     | H8     | 0.011402699275       |
| C4     | H8     | 0.0079835533953      |
| C5     | H8     | 0.94802845679        |
| H6     | H8     | 0.044092421633       |
| C7     | H8     | 0.043782127786       |
| C1     | H9     | 0.010375108983       |
| H2     | H9     | 0.00087523338133     |

|     |     |                  |
|-----|-----|------------------|
| H3  | H9  | 0.0008752364712  |
| C4  | H9  | 0.001935747835   |
| C5  | H9  | 0.042117011336   |
| H6  | H9  | 0.0038760012496  |
| C7  | H9  | 0.96679741557    |
| H8  | H9  | 0.0038759762702  |
| C1  | C1  | 0.0071089169219  |
| H2  | C1  | 0.00055759119323 |
| H3  | C1  | 0.0067175246011  |
| C4  | C1  | 0.00080158584234 |
| C5  | C1  | 0.041530274268   |
| H6  | C1  | 0.0036702150818  |
| C7  | C1  | 0.96313652329    |
| H8  | C1  | 0.011582873905   |
| H9  | C1  | 0.044098783508   |
| C1  | H11 | 0.0071115600272  |
| H2  | H11 | 0.0067173915505  |
| H3  | H11 | 0.00055759850242 |
| C4  | H11 | 0.00080092238747 |
| C5  | H11 | 0.041461624018   |
| H6  | H11 | 0.011582866552   |
| C7  | H11 | 0.96305358244    |
| H8  | H11 | 0.0036702676969  |
| H9  | H11 | 0.044098281769   |
| C1  | H11 | 0.044603919277   |
| C1  | H12 | 0.041462054208   |
| H2  | H12 | 0.011582928388   |
| H3  | H12 | 0.0036702175609  |
| C4  | H12 | 0.96306662697    |
| C5  | H12 | 0.0071107155514  |
| H6  | H12 | 0.0067175492002  |
| C7  | H12 | 0.00080093353895 |
| H8  | H12 | 0.00055760797302 |
| H9  | H12 | 6.6037139016e-05 |
| C1  | H12 | 4.8577137224e-05 |
| H11 | H12 | 0.00037192707196 |
| C1  | H13 | 0.041529102852   |
| H2  | H13 | 0.0036703990955  |
| H3  | H13 | 0.011582907987   |
| C4  | H13 | 0.96313863952    |
| C5  | H13 | 0.0071074055141  |
| H6  | H13 | 0.0005575636899  |
| C7  | H13 | 0.00080155951667 |
| H8  | H13 | 0.0067172430338  |
| H9  | H13 | 6.6035618402e-05 |
| C1  | H13 | 0.0003719161429  |
| H11 | H13 | 4.8574179099e-05 |
| H12 | H13 | 0.04460584223    |

|     |     |                  |
|-----|-----|------------------|
| C1  | H14 | 0.042117518056   |
| H2  | H14 | 0.0038760479896  |
| H3  | H14 | 0.003876012598   |
| C4  | H14 | 0.9668026587     |
| C5  | H14 | 0.010374778388   |
| H6  | H14 | 0.00087524085502 |
| C7  | H14 | 0.0019357464403  |
| H8  | H14 | 0.00087521848782 |
| H9  | H14 | 0.0004821137194  |
| C1  | H14 | 6.6035802945e-05 |
| H11 | H14 | 6.6035679942e-05 |
| H12 | H14 | 0.044099370222   |
| H13 | H14 | 0.044098799337   |

### CCSD

| Atom A | Atom B | Delocalization index |
|--------|--------|----------------------|
| C1     | H2     | 0.81215849704        |
| C1     | H3     | 0.81217363219        |
| H2     | H3     | 0.034009732427       |
| C1     | C4     | 0.84152543781        |
| H2     | C4     | 0.034914021937       |
| H3     | C4     | 0.034910903635       |
| C1     | C5     | 0.82935212817        |
| H2     | C5     | 0.033402314491       |
| H3     | C5     | 0.033486153139       |
| C4     | C5     | 0.038105428107       |
| C1     | H6     | 0.033403815574       |
| H2     | H6     | 0.0091923594936      |
| H3     | H6     | 0.0032043141544      |
| C4     | H6     | 0.0075232266318      |
| C5     | H6     | 0.81213907064        |
| C1     | C7     | 0.038107919052       |
| H2     | C7     | 0.0075232530797      |
| H3     | C7     | 0.0075347640644      |
| C4     | C7     | 0.007314424399       |
| C5     | C7     | 0.84152580218        |
| H6     | C7     | 0.034913464831       |
| C1     | H8     | 0.033487502262       |
| H2     | H8     | 0.0032041364146      |
| H3     | H8     | 0.0091923703065      |
| C4     | H8     | 0.0075342234885      |
| C5     | H8     | 0.81217317863        |
| H6     | H8     | 0.034009106415       |
| C7     | H8     | 0.034910188444       |
| C1     | H9     | 0.0080647932154      |
| H2     | H9     | 0.00077322324501     |
| H3     | H9     | 0.00077331229319     |
| C4     | H9     | 0.0016667767474      |

|     |     |                  |
|-----|-----|------------------|
| C5  | H9  | 0.033277813429   |
| H6  | H9  | 0.0033166585521  |
| C7  | H9  | 0.83132611061    |
| H8  | H9  | 0.0033166774611  |
| C1  | C1  | 0.0066230355032  |
| H2  | C1  | 0.00058375620495 |
| H3  | C1  | 0.0075848110892  |
| C4  | C1  | 0.00070501396105 |
| C5  | C1  | 0.032964194729   |
| H6  | C1  | 0.0031745486973  |
| C7  | C1  | 0.82693031649    |
| H8  | C1  | 0.0092041630899  |
| H9  | C1  | 0.034045192726   |
| C1  | H11 | 0.0066166510453  |
| H2  | H11 | 0.007584142927   |
| H3  | H11 | 0.00058381671297 |
| C4  | H11 | 0.00070463690707 |
| C5  | H11 | 0.032889258548   |
| H6  | H11 | 0.0092041704107  |
| C7  | H11 | 0.82691870456    |
| H8  | H11 | 0.0031746239346  |
| H9  | H11 | 0.034045307412   |
| C1  | H11 | 0.034490483298   |
| C1  | H12 | 0.032888869566   |
| H2  | H12 | 0.0092041678855  |
| H3  | H12 | 0.0031746097836  |
| C4  | H12 | 0.82691815417    |
| C5  | H12 | 0.0066153938242  |
| H6  | H12 | 0.0075846333639  |
| C7  | H12 | 0.0007046578026  |
| H8  | H12 | 0.00058380780321 |
| H9  | H12 | 7.5121904194e-05 |
| C1  | H12 | 5.5800397976e-05 |
| H11 | H12 | 0.0003803515941  |
| C1  | H13 | 0.032962388868   |
| H2  | H13 | 0.0031746902907  |
| H3  | H13 | 0.0092041699544  |
| C4  | H13 | 0.82692904138    |
| C5  | H13 | 0.0066225656538  |
| H6  | H13 | 0.00058377151907 |
| C7  | H13 | 0.00070497577553 |
| H8  | H13 | 0.0075843486289  |
| H9  | H13 | 7.5121365381e-05 |
| C1  | H13 | 0.00038035251904 |
| H11 | H13 | 5.579705285e-05  |
| H12 | H13 | 0.034490174377   |
| C1  | H14 | 0.033278060123   |
| H2  | H14 | 0.0033166639772  |

|     |     |                  |
|-----|-----|------------------|
| H3  | H14 | 0.0033166971211  |
| C4  | H14 | 0.83132918448    |
| C5  | H14 | 0.0080645479773  |
| H6  | H14 | 0.00077329516289 |
| C7  | H14 | 0.0016667894742  |
| H8  | H14 | 0.00077327734267 |
| H9  | H14 | 0.00046944804861 |
| C1  | H14 | 7.5123907464e-05 |
| H11 | H14 | 7.5123977786e-05 |
| H12 | H14 | 0.03404525431    |
| H13 | H14 | 0.034045441615   |

## ETHANE

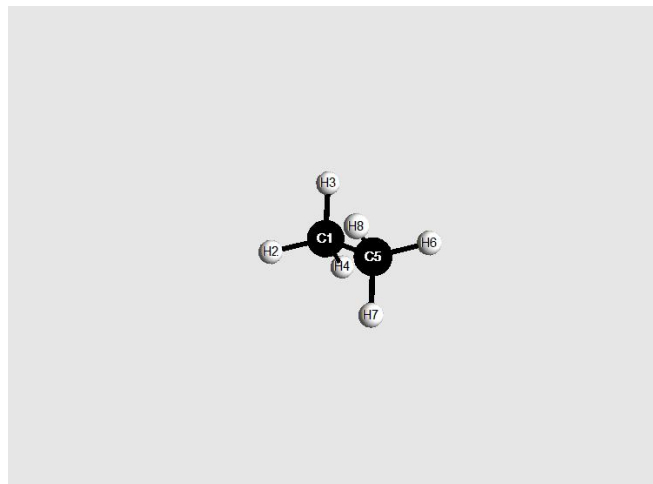

### HARTREE-FOCK

| Atom A | Atom B | Delocalization index |
|--------|--------|----------------------|
| C1     | H2     | 0.967108982          |
| C1     | H3     | 0.96706373207        |
| H2     | H3     | 0.044529963053       |
| C1     | H4     | 0.96705909746        |
| H2     | H4     | 0.044529483749       |
| H3     | H4     | 0.044529476803       |
| C1     | C5     | 0.99215865008        |
| H2     | C5     | 0.043570326039       |
| H3     | C5     | 0.043566550693       |
| H4     | C5     | 0.04354153403        |
| C1     | H6     | 0.043569668413       |
| H2     | H6     | 0.012028820023       |
| H3     | H6     | 0.0036646197023      |
| H4     | H6     | 0.0036645792582      |
| C5     | H6     | 0.96710314263        |
| C1     | H7     | 0.043566229985       |
| H2     | H7     | 0.0036646339331      |
| H3     | H7     | 0.012028812514       |
| H4     | H7     | 0.0036645709624      |
| C5     | H7     | 0.96706347211        |
| H6     | H7     | 0.044528957538       |
| C1     | H8     | 0.04354181174        |
| H2     | H8     | 0.0036645891798      |
| H3     | H8     | 0.0036646382865      |
| H4     | H8     | 0.012028826208       |
| C5     | H8     | 0.96706271957        |
| H6     | H8     | 0.044529282204       |
| H7     | H8     | 0.044529424004       |

## CCSD

| Atom A | Atom B | Delocalization index |
|--------|--------|----------------------|
| C1     | H2     | 0.83164503207        |
| C1     | H3     | 0.8316976086         |
| H2     | H3     | 0.034665310739       |
| C1     | H4     | 0.83167896479        |
| H2     | H4     | 0.034665045721       |
| H3     | H4     | 0.03466505042        |
| C1     | C5     | 0.85419411785        |
| H2     | C5     | 0.034751011055       |
| H3     | C5     | 0.034757264099       |
| H4     | C5     | 0.034749135734       |
| C1     | H6     | 0.03475113226        |
| H2     | H6     | 0.0095474343391      |
| H3     | H6     | 0.0031755061834      |
| H4     | H6     | 0.0031754892058      |
| C5     | H6     | 0.83164176327        |
| C1     | H7     | 0.034757292276       |
| H2     | H7     | 0.0031755402336      |
| H3     | H7     | 0.0095474018403      |
| H4     | H7     | 0.00317548122        |
| C5     | H7     | 0.83169855829        |
| H6     | H7     | 0.034665028145       |
| C1     | H8     | 0.03474938745        |
| H2     | H8     | 0.003175441917       |
| H3     | H8     | 0.0031753981452      |
| H4     | H8     | 0.0095474141558      |
| C5     | H8     | 0.83168105973        |
| H6     | H8     | 0.034665246001       |
| H7     | H8     | 0.034665224294       |



## METHANE

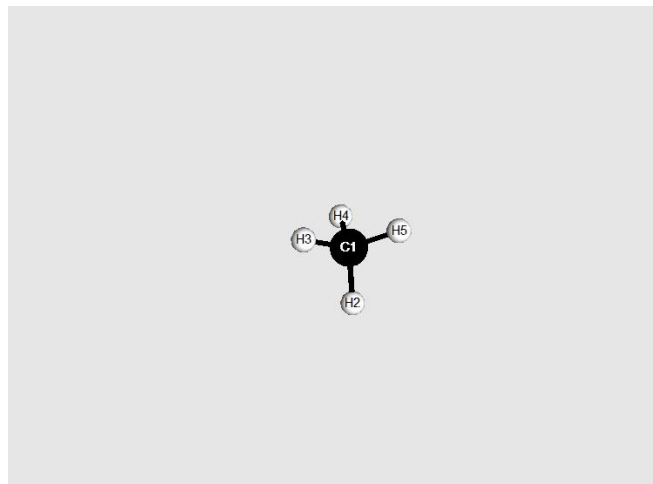

### HARTREE-FOCK

| Atom A | Atom B | Delocalization index |
|--------|--------|----------------------|
| C1     | H2     | 0.98182690831        |
| C1     | H3     | 0.98182826084        |
| H2     | H3     | 0.044325072993       |
| C1     | H4     | 0.98182465674        |
| H2     | H4     | 0.044325690147       |
| H3     | H4     | 0.044329124455       |
| C1     | H5     | 0.98182254623        |
| H2     | H5     | 0.044326511579       |
| H3     | H5     | 0.044328169017       |
| H4     | H5     | 0.044327994963       |

### CCSD

| Atom A | Atom B | Delocalization index |
|--------|--------|----------------------|
| C1     | H2     | 0.84645544956        |
| C1     | H3     | 0.84648982576        |
| H2     | H3     | 0.034455352181       |
| C1     | H4     | 0.84648623937        |
| H2     | H4     | 0.034457030782       |
| H3     | H4     | 0.034486193421       |
| C1     | H5     | 0.846487614          |
| H2     | H5     | 0.034458731313       |
| H3     | H5     | 0.034482410658       |
| H4     | H5     | 0.034482581631       |

# ALKENES

## ETHYLENE

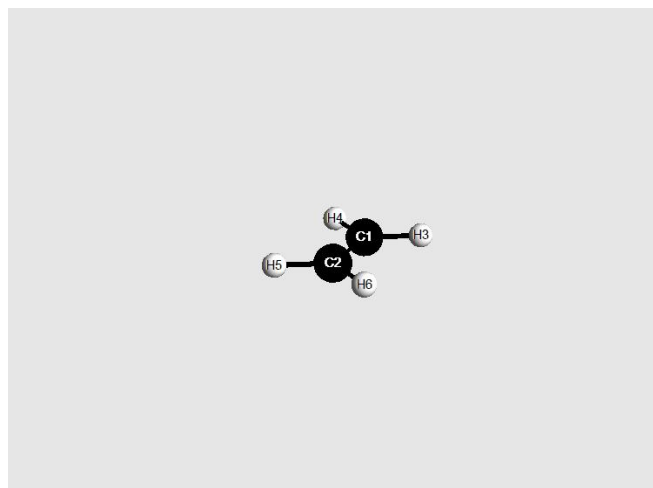

### HARTREE-FOCK

| Atom A | Atom B | Delocalization index |
|--------|--------|----------------------|
| C1     | C2     | 1.8821280045         |
| C1     | H3     | 0.98404062747        |
| C2     | H3     | 0.068315013865       |
| C1     | H4     | 0.98407121483        |
| C2     | H4     | 0.068308777675       |
| H3     | H4     | 0.037524578345       |
| C1     | H5     | 0.068314859998       |
| C2     | H5     | 0.98403998682        |
| H3     | H5     | 0.012877523587       |
| H4     | H5     | 0.0076595304555      |
| C1     | H6     | 0.068308703514       |
| C2     | H6     | 0.98407118365        |
| H3     | H6     | 0.0076595330212      |
| H4     | H6     | 0.01287755812        |
| H5     | H6     | 0.037524547534       |

### CCSD

| Atom A | Atom B | Delocalization index |
|--------|--------|----------------------|
| C1     | C2     | 1.4937280008         |
| C1     | H3     | 0.84937633633        |
| C2     | H3     | 0.048589058275       |
| C1     | H4     | 0.8493825996         |
| C2     | H4     | 0.048586586178       |
| H3     | H4     | 0.029534214674       |
| C1     | H5     | 0.048589119239       |
| C2     | H5     | 0.849377102          |
| H3     | H5     | 0.010476501835       |
| H4     | H5     | 0.0059876070246      |

|    |    |                 |
|----|----|-----------------|
| C1 | H6 | 0.048586579429  |
| C2 | H6 | 0.84938256659   |
| H3 | H6 | 0.0059876026129 |
| H4 | H6 | 0.010476517115  |
| H5 | H6 | 0.029534242996  |

## CYCLOBUTADIENE

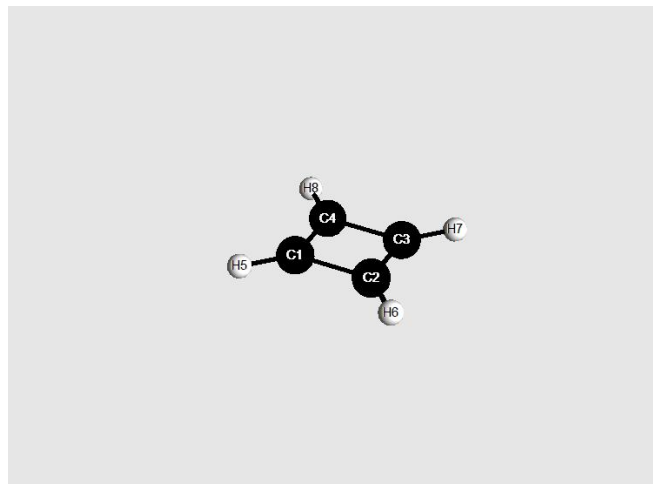

### HARTREE-FOCK

| Atom A | Atom B | Delocalization index |
|--------|--------|----------------------|
| C1     | C2     | 0.97751134223        |
| C1     | C3     | 0.14083699262        |
| C2     | C3     | 1.8501542947         |
| C1     | C4     | 1.8501540062         |
| C2     | C4     | 0.14062672489        |
| C3     | C4     | 0.97757550471        |
| C1     | H5     | 0.98281139425        |
| C2     | H5     | 0.035953575209       |
| C3     | H5     | 0.014774977417       |
| C4     | H5     | 0.063127510888       |
| C1     | H6     | 0.035954015423       |
| C2     | H6     | 0.98283509659        |
| C3     | H6     | 0.063126832461       |
| C4     | H6     | 0.014772991234       |
| H5     | H6     | 0.0011647337596      |
| C1     | H7     | 0.014779518214       |
| C2     | H7     | 0.063127836692       |
| C3     | H7     | 0.98281090622        |
| C4     | H7     | 0.035948911979       |
| H5     | H7     | 0.0048580011031      |
| H6     | H7     | 0.0034878651297      |
| C1     | H8     | 0.063135324794       |
| C2     | H8     | 0.014776994683       |
| C3     | H8     | 0.035948822337       |
| C4     | H8     | 0.98283551934        |
| H5     | H8     | 0.0034887175165      |
| H6     | H8     | 0.0048580111389      |
| H7     | H8     | 0.0011640893452      |

## CYCLOPENTADIENE

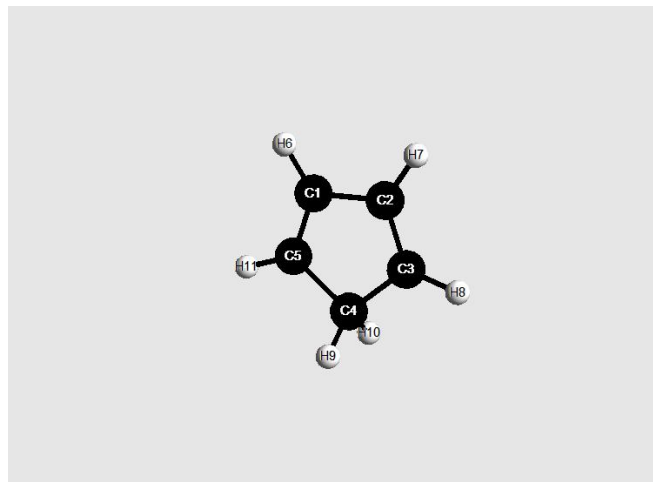

## HARTREE-FOCK

| Atom A | Atom B | Delocalization index |
|--------|--------|----------------------|
| C1     | C2     | 1.0795099051         |
| C1     | C3     | 0.082305230315       |
| C2     | C3     | 1.7398921709         |
| C1     | C4     | 0.072694177007       |
| C2     | C4     | 0.072702786954       |
| C3     | C4     | 1.0030595903         |
| C1     | C5     | 1.7398416853         |
| C2     | C5     | 0.082331596798       |
| C3     | C5     | 0.11913281346        |
| C4     | C5     | 1.0031119417         |
| C1     | H6     | 0.98318037784        |
| C2     | H6     | 0.036339293481       |
| C3     | H6     | 0.007290531713       |
| C4     | H6     | 0.010803442596       |
| C5     | H6     | 0.061312998322       |
| C1     | H7     | 0.036328590706       |
| C2     | H7     | 0.98325547078        |
| C3     | H7     | 0.061301134624       |
| C4     | H7     | 0.010803145451       |
| C5     | H7     | 0.0072909924409      |
| H6     | H7     | 0.0019435449741      |
| C1     | H8     | 0.010838622027       |
| C2     | H8     | 0.060805470595       |
| C3     | H8     | 0.98456960207        |
| C4     | H8     | 0.03530692687        |
| C5     | H8     | 0.013371631082       |
| H6     | H8     | 0.0015904836835      |
| H7     | H8     | 0.0044047952585      |
| C1     | H9     | 0.01861369551        |
| C2     | H9     | 0.018613557086       |

|    |     |                 |
|----|-----|-----------------|
| C3 | H9  | 0.047461210798  |
| C4 | H9  | 0.93985403632   |
| C5 | H9  | 0.047465721353  |
| H6 | H9  | 0.0016831561839 |
| H7 | H9  | 0.0016831623049 |
| H8 | H9  | 0.0016735796844 |
| C1 | C1  | 0.01855223117   |
| C2 | C1  | 0.018554052902  |
| C3 | C1  | 0.047365058501  |
| C4 | C1  | 0.94010885351   |
| C5 | C1  | 0.047362583117  |
| H6 | C1  | 0.0016833457443 |
| H7 | C1  | 0.0016833353319 |
| H8 | C1  | 0.0016724346873 |
| H9 | C1  | 0.0389767512    |
| C1 | H11 | 0.060798400745  |
| C2 | H11 | 0.010840632854  |
| C3 | H11 | 0.013370466456  |
| C4 | H11 | 0.035310170814  |
| C5 | H11 | 0.98460242453   |
| H6 | H11 | 0.0044048439854 |
| H7 | H11 | 0.001590478604  |
| H8 | H11 | 0.0018504020716 |
| H9 | H11 | 0.0016736084397 |
| C1 | H11 | 0.001672435363  |

## ALLYL

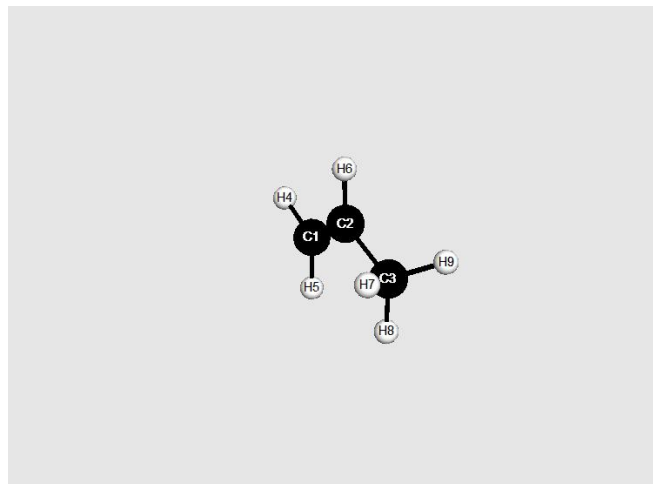

## HARTREE-FOCK

| Atom A | Atom B | Delocalization index |
|--------|--------|----------------------|
| C1     | C2     | 1.8392225423         |
| C1     | C3     | 0.064183776142       |
| C2     | C3     | 1.0172231777         |
| C1     | H4     | 0.98716878016        |
| C2     | H4     | 0.069046684063       |
| C3     | H4     | 0.011147252784       |
| C1     | H5     | 0.98169828117        |
| C2     | H5     | 0.067997948849       |
| C3     | H5     | 0.011074816064       |
| H4     | H5     | 0.037850976034       |
| C1     | H6     | 0.068282243735       |
| C2     | H6     | 0.9730225872         |
| C3     | H6     | 0.038584001503       |
| H4     | H6     | 0.0080269734012      |
| H5     | H6     | 0.013068400912       |
| C1     | H7     | 0.019262772471       |
| C2     | H7     | 0.047294631089       |
| C3     | H7     | 0.95975598556        |
| H4     | H7     | 0.0017736212098      |
| H5     | H7     | 0.0012083550444      |
| H6     | H7     | 0.0027336017972      |
| C1     | H8     | 0.012027306392       |
| C2     | H8     | 0.043783347419       |
| C3     | H8     | 0.95991936884        |
| H4     | H8     | 0.00097285494801     |
| H5     | H8     | 0.008297844831       |
| H6     | H8     | 0.010369803879       |
| H7     | H8     | 0.04160285443        |
| C1     | H9     | 0.019260824472       |
| C2     | H9     | 0.047297332676       |

|    |    |                 |
|----|----|-----------------|
| C3 | H9 | 0.95970894607   |
| H4 | H9 | 0.001773621715  |
| H5 | H9 | 0.0012083478183 |
| H6 | H9 | 0.0027343504521 |
| H7 | H9 | 0.043112379467  |
| H8 | H9 | 0.04160214995   |

#### CCSD

| Atom A | Atom B | Delocalization index |
|--------|--------|----------------------|
| C1     | C2     | 1.4634904463         |
| C1     | C3     | 0.049398241095       |
| C2     | C3     | 0.87987476281        |
| C1     | H4     | 0.85262303971        |
| C2     | H4     | 0.04843744503        |
| C3     | H4     | 0.0088137178803      |
| C1     | H5     | 0.84633517292        |
| C2     | H5     | 0.047466523516       |
| C3     | H5     | 0.0094051928071      |
| H4     | H5     | 0.02935855622        |
| C1     | H6     | 0.049475823555       |
| C2     | H6     | 0.83787497103        |
| C3     | H6     | 0.030979391188       |
| H4     | H6     | 0.0062519034239      |
| H5     | H6     | 0.010641956079       |
| C1     | H7     | 0.013493122995       |
| C2     | H7     | 0.036914929561       |
| C3     | H7     | 0.82634253792        |
| H4     | H7     | 0.0014939386332      |
| H5     | H7     | 0.000961042005       |
| H6     | H7     | 0.0023436884049      |
| C1     | H8     | 0.011237141684       |
| C2     | H8     | 0.034083584262       |
| C3     | H8     | 0.82449331873        |
| H4     | H8     | 0.00088546482267     |
| H5     | H8     | 0.009831558393       |
| H6     | H8     | 0.0084202806428      |
| H7     | H8     | 0.032457702441       |
| C1     | H9     | 0.013492292165       |
| C2     | H9     | 0.03691541391        |
| C3     | H9     | 0.82631787379        |
| H4     | H9     | 0.0014939486028      |
| H5     | H9     | 0.00096105959495     |
| H6     | H9     | 0.0023438692121      |
| H7     | H9     | 0.033861939998       |
| H8     | H9     | 0.032457488113       |



# ALKYNES

## PROPYNE

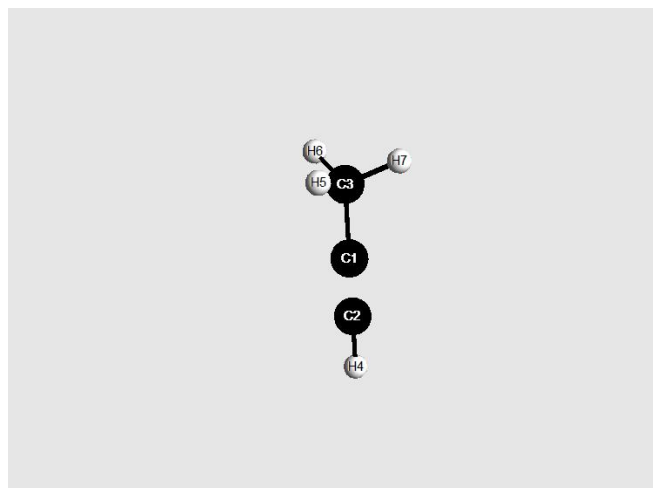

### HARTREE-FOCK

| Atom A | Atom B | Delocalization index |
|--------|--------|----------------------|
| C1     | C2     | 1.8005308309         |
| C1     | C3     | 1.0344881156         |
| C2     | C3     | 0.058245517946       |
| C1     | H4     | 0.062079116968       |
| C2     | H4     | 0.97138365057        |
| C3     | H4     | 0.0028193899193      |
| C1     | H5     | 0.05147835457        |
| C2     | H5     | 0.019726591292       |
| C3     | H5     | 0.95064835371        |
| H4     | H5     | 0.00079034237851     |
| C1     | H6     | 0.051460317748       |
| C2     | H6     | 0.019727174434       |
| C3     | H6     | 0.95070155423        |
| H4     | H6     | 0.00079030180535     |
| H5     | H6     | 0.037688161536       |
| C1     | H7     | 0.051452286249       |
| C2     | H7     | 0.019729524261       |
| C3     | H7     | 0.95071349393        |
| H4     | H7     | 0.00079021877812     |
| H5     | H7     | 0.037686963614       |
| H6     | H7     | 0.03768487073        |

### CCSD

| Atom A | Atom B | Delocalization index |
|--------|--------|----------------------|
| C1     | C2     | 2.1500479679         |
| C1     | C3     | 0.9229342433         |
| C2     | C3     | 0.048367672676       |
| C1     | H4     | 0.055114296698       |

|    |    |                  |
|----|----|------------------|
| C2 | H4 | 0.85530362622    |
| C3 | H4 | 0.0026118368436  |
| C1 | H5 | 0.040745551366   |
| C2 | H5 | 0.015126674809   |
| C3 | H5 | 0.81915134044    |
| H4 | H5 | 0.00066013018807 |
| C1 | H6 | 0.040743798952   |
| C2 | H6 | 0.015129568654   |
| C3 | H6 | 0.81926167262    |
| H4 | H6 | 0.00065995908738 |
| H5 | H6 | 0.030151353044   |
| C1 | H7 | 0.040745798051   |
| C2 | H7 | 0.015126622003   |
| C3 | H7 | 0.8192426493     |
| H4 | H7 | 0.00066015297216 |
| H5 | H7 | 0.030151938759   |
| H6 | H7 | 0.030151378643   |

### 1,3,5-HEXATRIYNE-HF

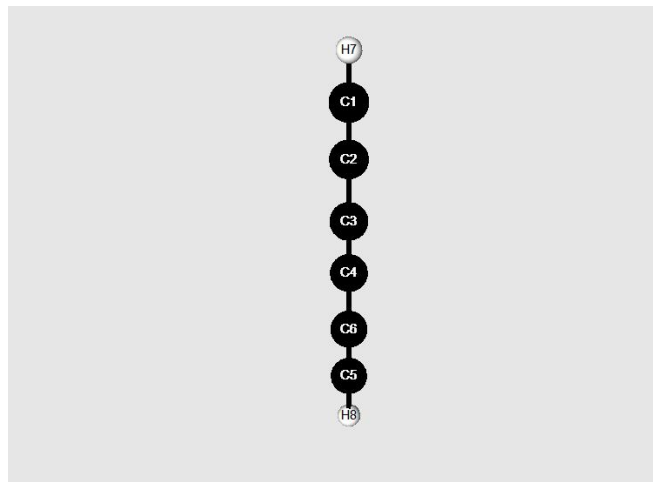

### HARTREE-FOCK

| Atom A | Atom B | Delocalization index |
|--------|--------|----------------------|
| C1     | C2     | 2.072579661          |
| C1     | C3     | 0.059459840161       |
| C2     | C3     | 1.0872262608         |
| C1     | C4     | 0.073388299956       |
| C2     | C4     | 0.055674871574       |
| C3     | C4     | 1.97562699           |
| C1     | C5     | 0.015086660206       |
| C2     | C5     | 0.0048421805753      |
| C3     | C5     | 0.073388139875       |
| C4     | C5     | 0.059459813881       |
| C1     | C6     | 0.0048421875065      |
| C2     | C6     | 0.0039541214528      |
| C3     | C6     | 0.055674843132       |
| C4     | C6     | 1.0872257624         |
| C5     | C6     | 2.0725801795         |
| C1     | H7     | 0.84806330431        |
| C2     | H7     | 0.04841973406        |
| C3     | H7     | 0.0026230747886      |
| C4     | H7     | 0.0030506863172      |
| C5     | H7     | 0.00073020892202     |
| C6     | H7     | 0.00022733601604     |
| C1     | H8     | 0.00073020960003     |
| C2     | H8     | 0.00022733603983     |
| C3     | H8     | 0.0030506850819      |
| C4     | H8     | 0.0026230758411      |
| C5     | H8     | 0.84806385764        |
| C6     | H8     | 0.04841978492        |
| H7     | H8     | 4.1918439459e-05     |

## 2-BUTYNE

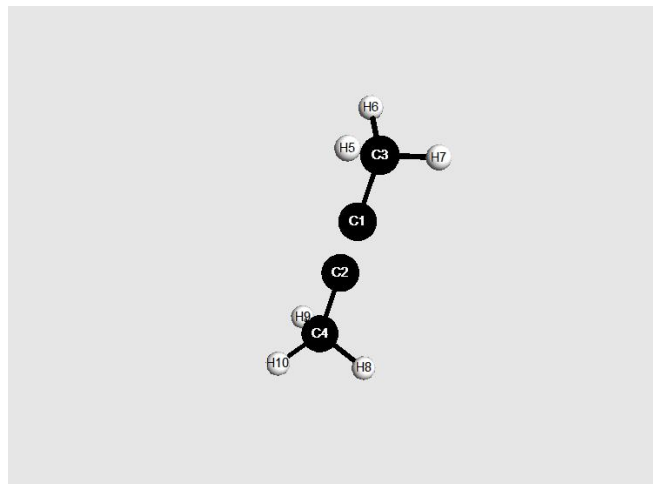

### HARTREE-FOCK

| Atom A | Atom B | Delocalization index |
|--------|--------|----------------------|
| C1     | C2     | 1.757006665          |
| C1     | C3     | 1.0370527861         |
| C2     | C3     | 0.05815826813        |
| C1     | C4     | 0.058185802408       |
| C2     | C4     | 1.0371491288         |
| C3     | C4     | 0.00277234493        |
| C1     | H5     | 0.050635030442       |
| C2     | H5     | 0.018798661691       |
| C3     | H5     | 0.95218195522        |
| C4     | H5     | 0.00077038078043     |
| C1     | H6     | 0.05063646934        |
| C2     | H6     | 0.018798030759       |
| C3     | H6     | 0.9522992298         |
| C4     | H6     | 0.00077029174017     |
| H5     | H6     | 0.03869677926        |
| C1     | H7     | 0.050638615183       |
| C2     | H7     | 0.018797307694       |
| C3     | H7     | 0.95227453286        |
| C4     | H7     | 0.00077024260632     |
| H5     | H7     | 0.038697903561       |
| H6     | H7     | 0.038696752986       |
| C1     | H8     | 0.018797821553       |
| C2     | H8     | 0.050632861061       |
| C3     | H8     | 0.00076996661017     |
| C4     | H8     | 0.95227569672        |
| H5     | H8     | 0.00020442638345     |
| H6     | H8     | 0.00020537068783     |
| H7     | H8     | 0.00081896202829     |
| C1     | H9     | 0.018796095657       |
| C2     | H9     | 0.050633396076       |

|    |    |                  |
|----|----|------------------|
| C3 | H9 | 0.00077012610386 |
| C4 | H9 | 0.95229249685    |
| H5 | H9 | 0.00020531665737 |
| H6 | H9 | 0.00081889408639 |
| H7 | H9 | 0.00020434005587 |
| H8 | H9 | 0.038696706833   |
| C1 | C1 | 0.018796927887   |
| C2 | C1 | 0.050637967777   |
| C3 | C1 | 0.00076923371623 |
| C4 | C1 | 0.95232111323    |
| H5 | C1 | 0.00081897463505 |
| H6 | C1 | 0.00020439132796 |
| H7 | C1 | 0.00020531557437 |
| H8 | C1 | 0.038698435866   |
| H9 | C1 | 0.038697149753   |

### CCSD

| Atom A | Atom B | Delocalization index |
|--------|--------|----------------------|
| C1     | H2     | 0.82004877368        |
| C1     | H3     | 0.82002366237        |
| H2     | H3     | 0.030850924244       |
| C1     | H4     | 0.8200756367         |
| H2     | H4     | 0.030850976594       |
| H3     | H4     | 0.030850702191       |
| C1     | C5     | 0.0025058927313      |
| H2     | C5     | 0.00064295644139     |
| H3     | C5     | 0.00064281000648     |
| H4     | C5     | 0.00064290653294     |
| C1     | H6     | 0.00064289203163     |
| H2     | H6     | 0.00022425410225     |
| H3     | H6     | 0.00022424759327     |
| H4     | H6     | 0.00056977839976     |
| C5     | H6     | 0.82008695185        |
| C1     | H7     | 0.00064276943989     |
| H2     | H7     | 0.00022424775548     |
| H3     | H7     | 0.00056990055479     |
| H4     | H7     | 0.00022420746115     |
| C5     | H7     | 0.82003251263        |
| H6     | H7     | 0.030849935102       |
| C1     | H8     | 0.00064290602696     |
| H2     | H8     | 0.00056982542706     |
| H3     | H8     | 0.00022420840973     |
| H4     | H8     | 0.00022426710177     |
| C5     | H8     | 0.82005273344        |
| H6     | H8     | 0.030852165561       |
| H7     | H8     | 0.03085210204        |
| C1     | C9     | 0.92209751322        |
| H2     | C9     | 0.040134714107       |

|    |    |                |
|----|----|----------------|
| H3 | C9 | 0.040134823856 |
| H4 | C9 | 0.040135102545 |
| C5 | C9 | 0.050425168735 |
| H6 | C9 | 0.014839881954 |
| H7 | C9 | 0.014840502456 |
| H8 | C9 | 0.014839847211 |
| C1 | C1 | 0.050425983339 |
| H2 | C1 | 0.014841715462 |
| H3 | C1 | 0.014842083144 |
| H4 | C1 | 0.014840954353 |
| C5 | C1 | 0.92207666521  |
| H6 | C1 | 0.040134495459 |
| H7 | C1 | 0.040133668058 |
| H8 | C1 | 0.040134594003 |
| C9 | C1 | 2.117268205    |

## ACETYLENE

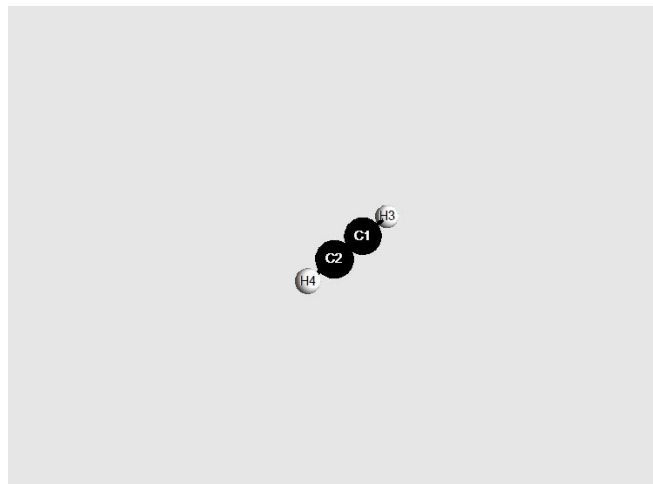

### HARTREE-FOCK

| Atom A | Atom B | Delocalization index |
|--------|--------|----------------------|
| C1     | C2     | 1.8248421587         |
| C1     | H3     | 0.96355743756        |
| C2     | H3     | 0.060236086441       |
| C1     | H4     | 0.060236099527       |
| C2     | H4     | 0.96355761987        |
| H3     | H4     | 0.0027444267078      |

### CCSD

| Atom A | Atom B | Delocalization index |
|--------|--------|----------------------|
| C1     | C2     | 2.1969580828         |
| C1     | H3     | 0.85191036328        |
| C2     | H3     | 0.051778619394       |
| C1     | H4     | 0.051778661486       |
| C2     | H4     | 0.85191082989        |
| H3     | H4     | 0.0027405223841      |

# AMINES

## ETHYLAMINE

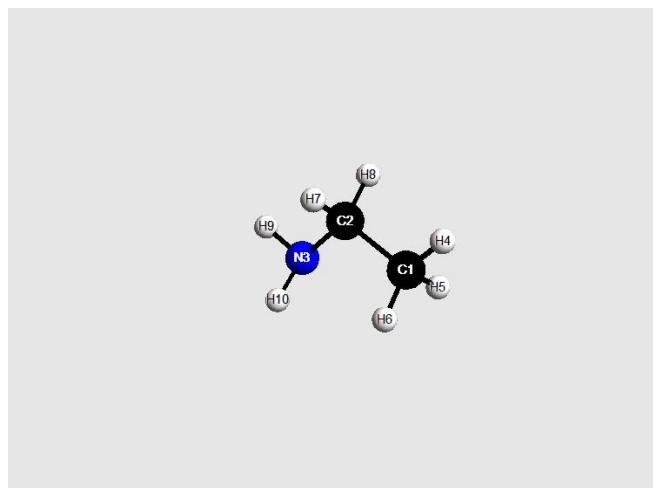

### HARTREE-FOCK

| Atom A | Atom B | Delocalization index |
|--------|--------|----------------------|
| C1     | C2     | 0.95993117312        |
| C1     | N3     | 0.074953378086       |
| C2     | N3     | 0.95258974339        |
| C1     | H4     | 0.96703788567        |
| C2     | H4     | 0.041867113558       |
| N3     | H4     | 0.012983158722       |
| C1     | H5     | 0.96043258963        |
| C2     | H5     | 0.039733102561       |
| N3     | H5     | 0.015326052331       |
| H4     | H5     | 0.042366729299       |
| C1     | H6     | 0.96318384926        |
| C2     | H6     | 0.041958190721       |
| N3     | H6     | 0.010536072287       |
| H4     | H6     | 0.044645446052       |
| H5     | H6     | 0.043694762341       |
| C1     | H7     | 0.044855661511       |
| C2     | H7     | 0.93128245875        |
| N3     | H7     | 0.078248994519       |
| H4     | H7     | 0.0041440518521      |
| H5     | H7     | 0.011589693961       |
| H6     | H7     | 0.0039228283999      |
| C1     | H8     | 0.042156089312       |
| C2     | H8     | 0.93054739323        |
| N3     | H8     | 0.064774415679       |
| H4     | H8     | 0.0037276645367      |
| H5     | H8     | 0.0039451914488      |
| H6     | H8     | 0.011527507159       |
| H7     | H8     | 0.042967020707       |



|    |    |                  |
|----|----|------------------|
| C1 | H9 | 0.0087905844579  |
| C2 | H9 | 0.021282292378   |
| N3 | H9 | 0.88916749049    |
| H4 | H9 | 0.002033989813   |
| H5 | H9 | 0.00050484861554 |
| H6 | H9 | 0.00059610408806 |
| H7 | H9 | 0.0020523887265  |
| H8 | H9 | 0.0022228548955  |
| C1 | C1 | 0.0045233430488  |
| C2 | C1 | 0.021685316808   |
| N3 | C1 | 0.88876532203    |
| H4 | C1 | 0.00052039238096 |
| H5 | C1 | 0.0003353020198  |
| H6 | C1 | 0.0036834474999  |
| H7 | C1 | 0.0023877381859  |
| H8 | C1 | 0.0099076949235  |
| H9 | C1 | 0.018578902262   |

## METHYLAMINE

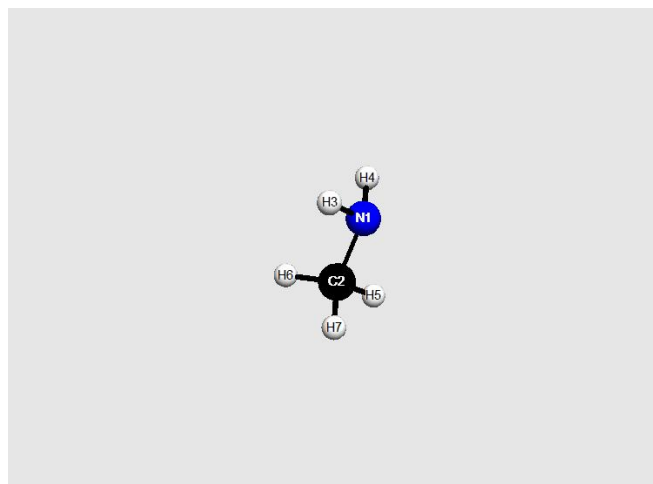

### HARTREE-FOCK

| Atom A | Atom B | Delocalization index |
|--------|--------|----------------------|
| N1     | C2     | 0.9788652564         |
| N1     | H3     | 0.88819682804        |
| C2     | H3     | 0.022326851164       |
| N1     | H4     | 0.88816237498        |
| C2     | H4     | 0.022324081816       |
| H3     | H4     | 0.018708222848       |
| N1     | H5     | 0.064018211314       |
| C2     | H5     | 0.94449429281        |
| H3     | H5     | 0.0097165183431      |
| H4     | H5     | 0.0020796994784      |
| N1     | H6     | 0.077755205349       |
| C2     | H6     | 0.94540015558        |
| H3     | H6     | 0.0022471881548      |
| H4     | H6     | 0.0022471879621      |
| H5     | H6     | 0.043582857975       |
| N1     | H7     | 0.064014166012       |
| C2     | H7     | 0.94466584777        |
| H3     | H7     | 0.0020796910554      |
| H4     | H7     | 0.0097165452828      |
| H5     | H7     | 0.041906297365       |
| H6     | H7     | 0.043583397503       |

### CCSD

| Atom A | Atom B | Delocalization index |
|--------|--------|----------------------|
| N1     | C2     | 0.86931435577        |
| N1     | H3     | 0.78118942041        |
| C2     | H3     | 0.021574321261       |
| N1     | H4     | 0.78126642182        |
| C2     | H4     | 0.021571632877       |
| H3     | H4     | 0.018231331996       |

|    |    |                 |
|----|----|-----------------|
| N1 | H5 | 0.048372447487  |
| C2 | H5 | 0.81552339819   |
| H3 | H5 | 0.0082053881086 |
| H4 | H5 | 0.0020191026907 |
| N1 | H6 | 0.059090276117  |
| C2 | H6 | 0.81582819486   |
| H3 | H6 | 0.0023618519954 |
| H4 | H6 | 0.0023618277822 |
| H5 | H6 | 0.033824252549  |
| N1 | H7 | 0.048360032041  |
| C2 | H7 | 0.81564764347   |
| H3 | H7 | 0.0020191320457 |
| H4 | H7 | 0.0082053843463 |
| H5 | H7 | 0.032784205008  |
| H6 | H7 | 0.033824385474  |

## DIETHYLAMINE

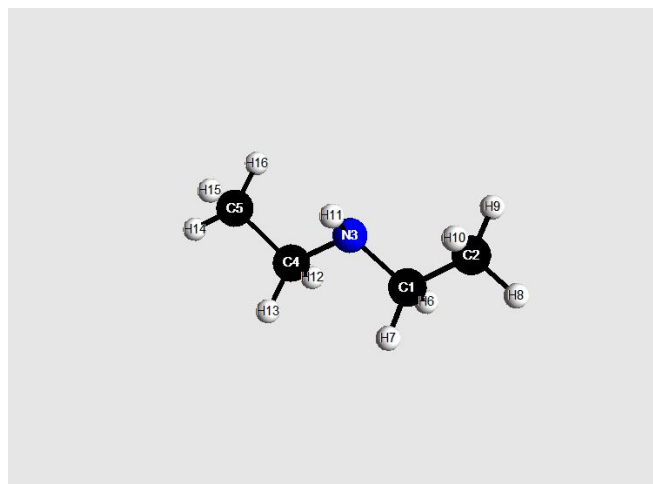

### HARTREE-FOCK

| Atom A | Atom B | Delocalization index |
|--------|--------|----------------------|
| C1     | C2     | 0.95981063294        |
| C1     | N3     | 0.94489981345        |
| C2     | N3     | 0.072319418633       |
| C1     | C4     | 0.029199763532       |
| C2     | C4     | 0.0084853010762      |
| N3     | C4     | 0.94521593364        |
| C1     | C5     | 0.0084828452002      |
| C2     | C5     | 0.0015276184404      |
| N3     | C5     | 0.072327802209       |
| C4     | C5     | 0.95986725218        |
| C1     | H6     | 0.92440454535        |
| C2     | H6     | 0.041472115327       |
| N3     | H6     | 0.062528244071       |
| C4     | H6     | 0.0074649530409      |
| C5     | H6     | 0.00091597031831     |
| C1     | H7     | 0.92223512129        |
| C2     | H7     | 0.043935569706       |
| N3     | H7     | 0.075880344772       |
| C4     | H7     | 0.0078926571226      |
| C5     | H7     | 0.001090711784       |
| H6     | H7     | 0.043175136612       |
| C1     | H8     | 0.041794050236       |
| C2     | H8     | 0.96688332614        |
| N3     | H8     | 0.012464148436       |
| C4     | H8     | 0.0017809745238      |
| C5     | H8     | 0.00034837600414     |
| H6     | H8     | 0.0037710243723      |
| H7     | H8     | 0.0041076531562      |
| C1     | H9     | 0.039603562074       |
| C2     | H9     | 0.96090823857        |

|     |     |                  |
|-----|-----|------------------|
| N3  | H9  | 0.014665782615   |
| C4  | H9  | 0.00061299011266 |
| C5  | H9  | 7.7305057993e-05 |
| H6  | H9  | 0.0038603800236  |
| H7  | H9  | 0.011364408845   |
| H8  | H9  | 0.042439828474   |
| C1  | C1  | 0.041749889541   |
| C2  | C1  | 0.9631878388     |
| N3  | C1  | 0.010129537442   |
| C4  | C1  | 0.00066947991331 |
| C5  | C1  | 6.3479688272e-05 |
| H6  | C1  | 0.011235292179   |
| H7  | C1  | 0.0038680288485  |
| H8  | C1  | 0.04459348701    |
| H9  | C1  | 0.043751879425   |
| C1  | H11 | 0.020991577114   |
| C2  | H11 | 0.0059102455102  |
| N3  | H11 | 0.87564557738    |
| C4  | H11 | 0.020965821764   |
| C5  | H11 | 0.0059118133836  |
| H6  | H11 | 0.0094228194359  |
| H7  | H11 | 0.0020271806781  |
| H8  | H11 | 0.00064741824023 |
| H9  | H11 | 0.00038360552089 |
| C1  | H11 | 0.0048148786152  |
| C1  | H12 | 0.0074614493533  |
| C2  | H12 | 0.00091590761707 |
| N3  | H12 | 0.062530094381   |
| C4  | H12 | 0.92440203799    |
| C5  | H12 | 0.04147204143    |
| H6  | H12 | 0.0091238225433  |
| H7  | H12 | 0.00073837344647 |
| H8  | H12 | 5.9004921064e-05 |
| H9  | H12 | 5.8082035207e-05 |
| C1  | H12 | 0.00044651999831 |
| H11 | H12 | 0.0094228058501  |
| C1  | H13 | 0.0078718896099  |
| C2  | H13 | 0.0010902884143  |
| N3  | H13 | 0.07586721912    |
| C4  | H13 | 0.9223772557     |
| C5  | H13 | 0.043894756761   |
| H6  | H13 | 0.00073842211679 |
| H7  | H13 | 0.010052224569   |
| H8  | H13 | 0.0001006627783  |
| H9  | H13 | 0.00051204661827 |
| C1  | H13 | 6.6164160872e-05 |
| H11 | H13 | 0.0020273039063  |
| H12 | H13 | 0.04317564478    |

|     |     |                  |
|-----|-----|------------------|
| C1  | H14 | 0.0017808062146  |
| C2  | H14 | 0.00034840161857 |
| N3  | H14 | 0.012462694379   |
| C4  | H14 | 0.041809727454   |
| C5  | H14 | 0.96681548883    |
| H6  | H14 | 5.9005005449e-05 |
| H7  | H14 | 0.00010065891004 |
| H8  | H14 | 0.00013986335907 |
| H9  | H14 | 1.6064844199e-05 |
| C1  | H14 | 1.7759844134e-05 |
| H11 | H14 | 0.00064738545334 |
| H12 | H14 | 0.0037710761539  |
| H13 | H14 | 0.0041076662341  |
| C1  | H15 | 0.00066929801312 |
| C2  | H15 | 6.3472224503e-05 |
| N3  | H15 | 0.010123821191   |
| C4  | H15 | 0.041727366966   |
| C5  | H15 | 0.96311456124    |
| H6  | H15 | 0.0004465138681  |
| H7  | H15 | 6.6158111521e-05 |
| H8  | H15 | 1.775961567e-05  |
| H9  | H15 | 5.2241839545e-06 |
| C1  | H15 | 2.1270078643e-05 |
| H11 | H15 | 0.0048148551141  |
| H12 | H15 | 0.011235299906   |
| H13 | H15 | 0.0038678389808  |
| H14 | H15 | 0.04459384262    |
| C1  | H16 | 0.00061194142047 |
| C2  | H16 | 7.7286315152e-05 |
| N3  | H16 | 0.014664433891   |
| C4  | H16 | 0.039709773693   |
| C5  | H16 | 0.96093832199    |
| H6  | H16 | 5.8078266664e-05 |
| H7  | H16 | 0.00051203155067 |
| H8  | H16 | 1.6064574736e-05 |
| H9  | H16 | 2.5568157992e-05 |
| C1  | H16 | 5.2243584329e-06 |
| H11 | H16 | 0.0003835995622  |
| H12 | H16 | 0.0038602216363  |
| H13 | H16 | 0.011364429469   |
| H14 | H16 | 0.042439720959   |
| H15 | H16 | 0.043751849145   |

## DIPROPYLAMINE

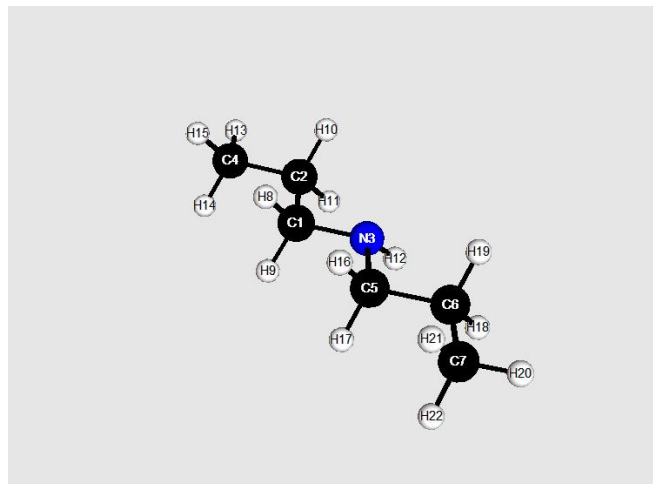

### HARTREE-FOCK

| Atom A | Atom B | Delocalization index |
|--------|--------|----------------------|
| C1     | C2     | 0.94764690535        |
| C1     | N3     | 0.94451006105        |
| C2     | N3     | 0.069124009458       |
| C1     | C4     | 0.043458984226       |
| C2     | C4     | 0.97835613498        |
| N3     | C4     | 0.011006379113       |
| C1     | C5     | 0.029265766602       |
| C2     | C5     | 0.0082453221557      |
| N3     | C5     | 0.94460912186        |
| C4     | C5     | 0.0014810240004      |
| C1     | C6     | 0.0082453010009      |
| C2     | C6     | 0.0014218821048      |
| N3     | C6     | 0.069162630177       |
| C4     | C6     | 0.00027090617505     |
| C5     | C6     | 0.9477759187         |
| C1     | C7     | 0.0014806480285      |
| C2     | C7     | 0.00027080059496     |
| N3     | C7     | 0.011003877665       |
| C4     | C7     | 9.1655599979e-05     |
| C5     | C7     | 0.043470258067       |
| C6     | C7     | 0.9784332806         |
| C1     | H8     | 0.9206527986         |
| C2     | H8     | 0.039244316143       |
| N3     | H8     | 0.062002018959       |
| C4     | H8     | 0.0076126315329      |
| C5     | H8     | 0.00756387589        |
| C6     | H8     | 0.00089508468684     |
| C7     | H8     | 5.6034230962e-05     |
| C1     | H9     | 0.91806678689        |
| C2     | H9     | 0.041451910821       |

|     |     |                  |
|-----|-----|------------------|
| N3  | H9  | 0.074868577027   |
| C4  | H9  | 0.0084710166837  |
| C5  | H9  | 0.0077766887652  |
| C6  | H9  | 0.0010338269926  |
| C7  | H9  | 8.5468048987e-05 |
| H8  | H9  | 0.043211909369   |
| C1  | C1  | 0.039939515906   |
| C2  | C1  | 0.94695326826    |
| N3  | C1  | 0.016034850783   |
| C4  | C1  | 0.041959443014   |
| C5  | C1  | 0.0006403529984  |
| C6  | C1  | 6.228499249e-05  |
| C7  | C1  | 1.2653252113e-05 |
| H8  | C1  | 0.003842285874   |
| H9  | C1  | 0.010903776039   |
| C1  | H11 | 0.041882653918   |
| C2  | H11 | 0.94840678399    |
| N3  | H11 | 0.011056178801   |
| C4  | H11 | 0.044106388669   |
| C5  | H11 | 0.00071796884244 |
| C6  | H11 | 5.3140347002e-05 |
| C7  | H11 | 1.658662429e-05  |
| H8  | H11 | 0.010806837661   |
| H9  | H11 | 0.0037743485659  |
| C1  | H11 | 0.043336912004   |
| C1  | H12 | 0.020833744854   |
| C2  | H12 | 0.005651772594   |
| N3  | H12 | 0.87522044932    |
| C4  | H12 | 0.00061616376894 |
| C5  | H12 | 0.020905097118   |
| C6  | H12 | 0.0056604484563  |
| C7  | H12 | 0.00061599151179 |
| H8  | H12 | 0.0093174933651  |
| H9  | H12 | 0.0020220897989  |
| C1  | H12 | 0.00041081912998 |
| H11 | H12 | 0.0053371341039  |
| C1  | H13 | 0.009986260547   |
| C2  | H13 | 0.04242552553    |
| N3  | H13 | 0.0019940759306  |
| C4  | H13 | 0.96661073821    |
| C5  | H13 | 0.00033399512214 |
| C6  | H13 | 0.00010652573187 |
| C7  | H13 | 2.88145434e-05   |
| H8  | H13 | 0.00084672064744 |
| H9  | H13 | 0.00099741821021 |
| C1  | H13 | 0.0037742365573  |
| H11 | H13 | 0.0039518013769  |
| H12 | H13 | 2.5445974467e-05 |



|     |     |                  |
|-----|-----|------------------|
| C1  | H14 | 0.0067991629159  |
| C2  | H14 | 0.041705281991   |
| N3  | H14 | 0.0016241306724  |
| C4  | H14 | 0.96337098414    |
| C5  | H14 | 7.2560264679e-05 |
| C6  | H14 | 1.9755608224e-05 |
| C7  | H14 | 5.1820168441e-06 |
| H8  | H14 | 0.00057162592208 |
| H9  | H14 | 0.0074825038     |
| C1  | H14 | 0.011325683005   |
| H11 | H14 | 0.0037092960659  |
| H12 | H14 | 4.4656544783e-05 |
| H13 | H14 | 0.04441358933    |
| C1  | H15 | 0.0068252101035  |
| C2  | H15 | 0.041664475978   |
| N3  | H15 | 0.00098571162018 |
| C4  | H15 | 0.96324950183    |
| C5  | H15 | 5.4323715668e-05 |
| C6  | H15 | 1.3689384626e-05 |
| C7  | H15 | 4.0401786431e-06 |
| H8  | H15 | 0.0064378043065  |
| H9  | H15 | 0.00062985341326 |
| C1  | H15 | 0.0035505973931  |
| H11 | H15 | 0.011636905935   |
| H12 | H15 | 0.00028500548433 |
| H13 | H15 | 0.044331748697   |
| H14 | H15 | 0.044878238966   |
| C1  | H16 | 0.0075549437269  |
| C2  | H16 | 0.00089449726104 |
| N3  | H16 | 0.06199181359    |
| C4  | H16 | 5.6070958497e-05 |
| C5  | H16 | 0.920445094      |
| C6  | H16 | 0.039314473627   |
| C7  | H16 | 0.0076058411528  |
| H8  | H16 | 0.0093022041327  |
| H9  | H16 | 0.00073348574939 |
| C1  | H16 | 5.9367282736e-05 |
| H11 | H16 | 0.0004611982846  |
| H12 | H16 | 0.0093174398535  |
| H13 | H16 | 1.2350959124e-05 |
| H14 | H16 | 7.5704702198e-06 |
| H15 | H16 | 2.340665326e-05  |
| C1  | H17 | 0.0077683615729  |
| C2  | H17 | 0.0010330848192  |
| N3  | H17 | 0.074868208734   |
| C4  | H17 | 8.5468314343e-05 |
| C5  | H17 | 0.91805239946    |
| C6  | H17 | 0.041481833637   |

|     |     |                  |
|-----|-----|------------------|
| C7  | H17 | 0.0084732965001  |
| H8  | H17 | 0.00073349930858 |
| H9  | H17 | 0.0098744016154  |
| C1  | H17 | 0.00053179684066 |
| H11 | H17 | 6.8410723005e-05 |
| H12 | H17 | 0.0020221393582  |
| H13 | H17 | 1.3085337733e-05 |
| H14 | H17 | 4.7015793574e-05 |
| H15 | H17 | 7.0338049435e-06 |
| H16 | H17 | 0.043212444581   |
| C1  | H18 | 0.00071771087271 |
| C2  | H18 | 5.3052378944e-05 |
| N3  | H18 | 0.011048357364   |
| C4  | H18 | 1.659273621e-05  |
| C5  | H18 | 0.042009921157   |
| C6  | H18 | 0.94823144515    |
| C7  | H18 | 0.044093435577   |
| H8  | H18 | 0.00046117706912 |
| H9  | H18 | 6.8397570836e-05 |
| C1  | H18 | 5.4003147687e-06 |
| H11 | H18 | 2.0681948484e-05 |
| H12 | H18 | 0.0053370081828  |
| H13 | H18 | 3.0847741522e-06 |
| H14 | H18 | 1.4163290195e-06 |
| H15 | H18 | 3.3306334935e-06 |
| H16 | H18 | 0.010806682432   |
| H17 | H18 | 0.0037742216499  |
| C1  | H19 | 0.00064002111115 |
| C2  | H19 | 6.2192149038e-05 |
| N3  | H19 | 0.016033909455   |
| C4  | H19 | 1.2651783737e-05 |
| C5  | H19 | 0.039891000508   |
| C6  | H19 | 0.94698529963    |
| C7  | H19 | 0.041952863603   |
| H8  | H19 | 5.9367633512e-05 |
| H9  | H19 | 0.00053179761841 |
| C1  | H19 | 2.591044035e-05  |
| H11 | H19 | 5.4009047349e-06 |
| H12 | H19 | 0.00041085058051 |
| H13 | H19 | 2.6427942217e-06 |
| H14 | H19 | 5.2492346865e-06 |
| H15 | H19 | 1.05507567e-06   |
| H16 | H19 | 0.0038421217912  |
| H17 | H19 | 0.010903752394   |
| H18 | H19 | 0.043336233826   |
| C1  | C2  | 0.00033392590787 |
| C2  | C2  | 0.00010651242854 |
| N3  | C2  | 0.0019940384521  |

|     |     |                  |
|-----|-----|------------------|
| C4  | C2  | 2.8816524138e-05 |
| C5  | C2  | 0.0099871407807  |
| C6  | C2  | 0.042446466863   |
| C7  | C2  | 0.96656208692    |
| H8  | C2  | 1.2351626171e-05 |
| H9  | C2  | 1.3084969248e-05 |
| C1  | C2  | 2.6427098203e-06 |
| H11 | C2  | 3.085379411e-06  |
| H12 | C2  | 2.544655713e-05  |
| H13 | C2  | 1.0090718424e-05 |
| H14 | C2  | 1.0622468494e-06 |
| H15 | C2  | 9.4806116882e-07 |
| H16 | C2  | 0.0008467462228  |
| H17 | C2  | 0.00099739675426 |
| H18 | C2  | 0.003951714013   |
| H19 | C2  | 0.003774197737   |
| C1  | H21 | 5.4238368806e-05 |
| C2  | H21 | 1.3680389146e-05 |
| N3  | H21 | 0.00098528578959 |
| C4  | H21 | 4.040752776e-06  |
| C5  | H21 | 0.0068332902054  |
| C6  | H21 | 0.041727064904   |
| C7  | H21 | 0.96323253892    |
| H8  | H21 | 2.3405722337e-05 |
| H9  | H21 | 7.0327863354e-06 |
| C1  | H21 | 1.0554190961e-06 |
| H11 | H21 | 3.3310426527e-06 |
| H12 | H21 | 0.00028499975552 |
| H13 | H21 | 9.4828313234e-07 |
| H14 | H21 | 2.4819322884e-07 |
| H15 | H21 | 4.820795376e-07  |
| H16 | H21 | 0.0064373290093  |
| H17 | H21 | 0.00062976362592 |
| H18 | H21 | 0.011636811817   |
| H19 | H21 | 0.0035505421194  |
| C2  | H21 | 0.044331722279   |
| C1  | H22 | 7.2527545753e-05 |
| C2  | H22 | 1.9741480781e-05 |
| N3  | H22 | 0.0016240916485  |
| C4  | H22 | 5.1817287328e-06 |
| C5  | H22 | 0.0067966866628  |
| C6  | H22 | 0.04174621219    |
| C7  | H22 | 0.96336838623    |
| H8  | H22 | 7.5708054163e-06 |
| H9  | H22 | 4.7016338088e-05 |
| C1  | H22 | 5.24912094e-06   |
| H11 | H22 | 1.4165137492e-06 |
| H12 | H22 | 4.4659247858e-05 |

|     |     |                  |
|-----|-----|------------------|
| H13 | H22 | 1.0620860707e-06 |
| H14 | H22 | 1.1489092597e-06 |
| H15 | H22 | 2.4829521098e-07 |
| H16 | H22 | 0.00057165833671 |
| H17 | H22 | 0.0074824405052  |
| H18 | H22 | 0.003709304189   |
| H19 | H22 | 0.011325660569   |
| C2  | H22 | 0.044413182901   |
| H21 | H22 | 0.044878411688   |

## PROPYLAMINE

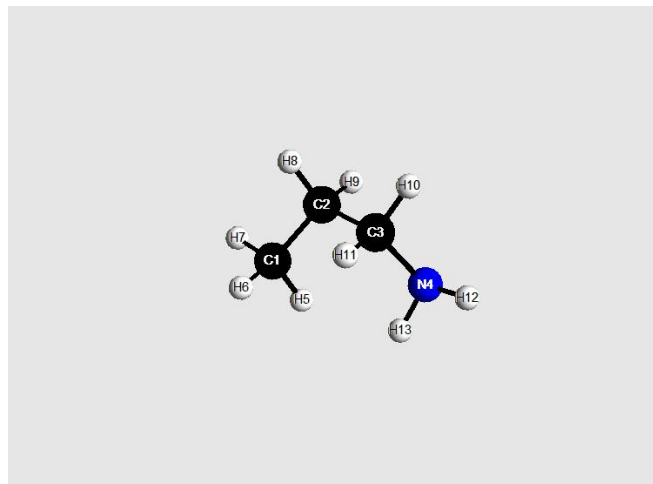

## HARTREE-FOCK

| Atom A | Atom B | Delocalization index |
|--------|--------|----------------------|
| C1     | C2     | 0.97652467925        |
| C1     | C3     | 0.041245474113       |
| C2     | C3     | 0.94815322933        |
| C1     | N4     | 0.013654144283       |
| C2     | N4     | 0.068385161031       |
| C3     | N4     | 0.95106585831        |
| C1     | H5     | 0.96014492374        |
| C2     | H5     | 0.040610158243       |
| C3     | H5     | 0.0030882579996      |
| N4     | H5     | 0.014110428552       |
| C1     | H6     | 0.96330578107        |
| C2     | H6     | 0.041998759807       |
| C3     | H6     | 0.0072044171823      |
| N4     | H6     | 0.0016003576096      |
| H5     | H6     | 0.044841973859       |
| C1     | H7     | 0.96572494323        |
| C2     | H7     | 0.042196745825       |
| C3     | H7     | 0.010152845416       |
| N4     | H7     | 0.0016373471442      |
| H5     | H7     | 0.044177573971       |
| H6     | H7     | 0.044530399967       |
| C1     | H8     | 0.0445218324         |
| C2     | H8     | 0.95207905068        |
| C3     | H8     | 0.043566695619       |
| N4     | H8     | 0.011980430317       |
| H5     | H8     | 0.011524376013       |
| H6     | H8     | 0.0034401357579      |
| H7     | H8     | 0.0044896650473      |
| C1     | H9     | 0.042973030712       |
| C2     | H9     | 0.9469920518         |

|     |     |                  |
|-----|-----|------------------|
| C3  | H9  | 0.040300529129   |
| N4  | H9  | 0.015713452264   |
| H5  | H9  | 0.0037365701206  |
| H6  | H9  | 0.011542547526   |
| H7  | H9  | 0.0034537330756  |
| H8  | H9  | 0.042236644631   |
| C1  | C1  | 0.0099036063163  |
| C2  | C1  | 0.04142016875    |
| C3  | C1  | 0.93044023586    |
| N4  | C1  | 0.0649028815     |
| H5  | C1  | 0.00044642873517 |
| H6  | C1  | 0.00075170630131 |
| H7  | C1  | 0.0018080124077  |
| H8  | C1  | 0.0049455371217  |
| H9  | C1  | 0.0039348320716  |
| C1  | H11 | 0.0076369476718  |
| C2  | H11 | 0.043082161865   |
| C3  | H11 | 0.9272696825     |
| N4  | H11 | 0.078329240361   |
| H5  | H11 | 0.0004173701265  |
| H6  | H11 | 0.0066678155343  |
| H7  | H11 | 0.00079797726724 |
| H8  | H11 | 0.0040127024012  |
| H9  | H11 | 0.011257096816   |
| C1  | H11 | 0.042477948405   |
| C1  | H12 | 0.00085190626303 |
| C2  | H12 | 0.0082638215863  |
| C3  | H12 | 0.021421716227   |
| N4  | H12 | 0.88823529004    |
| H5  | H12 | 0.00094682770472 |
| H6  | H12 | 6.091132084e-05  |
| H7  | H12 | 0.00010505722649 |
| H8  | H12 | 0.0016234074149  |
| H9  | H12 | 0.00045970874844 |
| C1  | H12 | 0.0029167624426  |
| H11 | H12 | 0.0017295835623  |
| C1  | H13 | 0.0059920558673  |
| C2  | H13 | 0.0018814081168  |
| C3  | H13 | 0.0211806628     |
| N4  | H13 | 0.8832255114     |
| H5  | H13 | 0.0075380256827  |
| H6  | H13 | 0.00060322560507 |
| H7  | H13 | 0.0010134343127  |
| H8  | H13 | 0.00028933348391 |
| H9  | H13 | 0.00027676963617 |
| C1  | H13 | 0.0094548304607  |
| H11 | H13 | 0.0027248352875  |
| H12 | H13 | 0.018217967893   |



# AMINOACIDS

## LYSINE

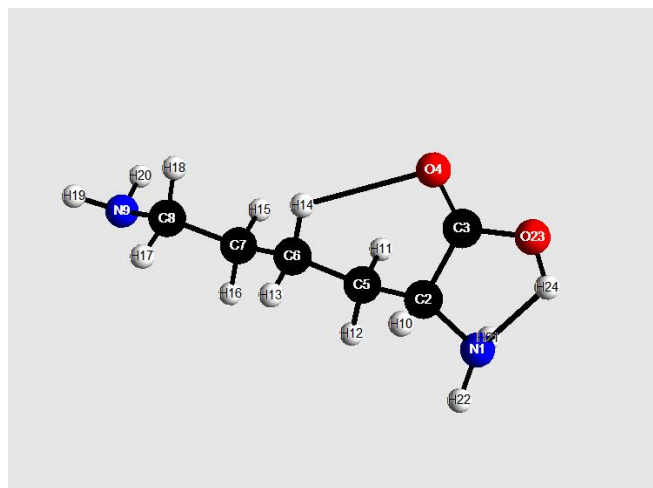

### HARTREE-FOCK

| Atom A | Atom B | Delocalization index |
|--------|--------|----------------------|
| N1     | C2     | 0.94118393624        |
| N1     | C3     | 0.057100116566       |
| C2     | C3     | 0.85509991425        |
| N1     | O4     | 0.014227833559       |
| C2     | O4     | 0.10040425676        |
| C3     | O4     | 1.1096808632         |
| N1     | C5     | 0.071738457116       |
| C2     | C5     | 0.93767363067        |
| C3     | C5     | 0.032789284475       |
| O4     | C5     | 0.024399363905       |
| N1     | C6     | 0.011420632134       |
| C2     | C6     | 0.03825966362        |
| C3     | C6     | 0.0018180982958      |
| O4     | C6     | 0.018410984724       |
| C5     | C6     | 0.96336932591        |
| N1     | C7     | 0.0018064505585      |
| C2     | C7     | 0.0085529424635      |
| C3     | C7     | 0.00031743954803     |
| O4     | C7     | 0.0015197566926      |
| C5     | C7     | 0.044610563727       |
| C6     | C7     | 0.96709163154        |
| N1     | C8     | 0.0004369264761      |
| C2     | C8     | 0.0014565154185      |
| C3     | C8     | 4.8808795248e-05     |
| O4     | C8     | 7.8509261134e-05     |
| C5     | C8     | 0.0087366864324      |
| C6     | C8     | 0.041659535317       |
| C7     | C8     | 0.94741207789        |



|     |     |                  |
|-----|-----|------------------|
| N1  | N9  | 0.00013580523135 |
| C2  | N9  | 0.00035614829319 |
| C3  | N9  | 1.1382137874e-05 |
| O4  | N9  | 4.1397553447e-05 |
| C5  | N9  | 0.0017355027298  |
| C6  | N9  | 0.011151089373   |
| C7  | N9  | 0.072493598139   |
| C8  | N9  | 0.95329946074    |
| N1  | N1  | 0.061218924428   |
| C2  | N1  | 0.90772319714    |
| C3  | N1  | 0.044510051835   |
| O4  | N1  | 0.0149769459     |
| C5  | N1  | 0.034062034281   |
| C6  | N1  | 0.010543176321   |
| C7  | N1  | 0.0011887904386  |
| C8  | N1  | 5.356754496e-05  |
| N9  | N1  | 2.8111618331e-05 |
| N1  | H11 | 0.0056605861989  |
| C2  | H11 | 0.041790865347   |
| C3  | H11 | 0.0058285411453  |
| O4  | H11 | 0.013587284914   |
| C5  | H11 | 0.94044643098    |
| C6  | H11 | 0.037641592303   |
| C7  | H11 | 0.0076737467919  |
| C8  | H11 | 0.00083644264591 |
| N9  | H11 | 7.5583906792e-05 |
| N1  | H11 | 0.0092264731788  |
| N1  | H12 | 0.022858478919   |
| C2  | H12 | 0.042392314074   |
| C3  | H12 | 0.0070177768263  |
| O4  | H12 | 0.0024433440622  |
| C5  | H12 | 0.94104281539    |
| C6  | H12 | 0.039587072073   |
| C7  | H12 | 0.008062323551   |
| C8  | H12 | 0.0008126703787  |
| N9  | H12 | 8.908045933e-05  |
| N1  | H12 | 0.0018824448021  |
| H11 | H12 | 0.041961829972   |
| N1  | H13 | 0.00072639655621 |
| C2  | H13 | 0.0071680956321  |
| C3  | H13 | 0.00043520115268 |
| O4  | H13 | 0.0012915311194  |
| C5  | H13 | 0.044152786176   |
| C6  | H13 | 0.94545436854    |
| C7  | H13 | 0.041755585526   |
| C8  | H13 | 0.0074168001837  |
| N9  | H13 | 0.0010625638801  |
| N1  | H13 | 0.008528901556   |

|     |     |                  |
|-----|-----|------------------|
| H11 | H13 | 0.010746386732   |
| H12 | H13 | 0.0040735999793  |
| N1  | H14 | 0.00062102315339 |
| C2  | H14 | 0.0032364735199  |
| C3  | H14 | 0.0011735154454  |
| O4  | H14 | 0.033106371565   |
| C5  | H14 | 0.038501811471   |
| C6  | H14 | 0.93291488467    |
| C7  | H14 | 0.0373292348     |
| C8  | H14 | 0.0066907698917  |
| N9  | H14 | 0.0015515203083  |
| N1  | H14 | 0.00078437915353 |
| H11 | H14 | 0.0027154735061  |
| H12 | H14 | 0.010164414924   |
| H13 | H14 | 0.041026028939   |
| N1  | H15 | 9.8838948077e-05 |
| C2  | H15 | 0.00076216537325 |
| C3  | H15 | 4.1293152279e-05 |
| O4  | H15 | 0.0001961823261  |
| C5  | H15 | 0.0077109268065  |
| C6  | H15 | 0.0416450793     |
| C7  | H15 | 0.94389631243    |
| C8  | H15 | 0.041155427751   |
| N9  | H15 | 0.011561979599   |
| N1  | H15 | 0.0003905100889  |
| H11 | H15 | 0.0071547204918  |
| H12 | H15 | 0.00059094413271 |
| H13 | H15 | 0.011127121437   |
| H14 | H15 | 0.003392619009   |
| N1  | H16 | 6.9063581042e-05 |
| C2  | H16 | 0.00071740103545 |
| C3  | H16 | 0.00014904961997 |
| O4  | H16 | 0.00049507684453 |
| C5  | H16 | 0.0078242397423  |
| C6  | H16 | 0.040195974109   |
| C7  | H16 | 0.94292039162    |
| C8  | H16 | 0.039573069956   |
| N9  | H16 | 0.017077930847   |
| N1  | H16 | 6.8059802521e-05 |
| H11 | H16 | 0.00059715864082 |
| H12 | H16 | 0.007554205571   |
| H13 | H16 | 0.0035445120185  |
| H14 | H16 | 0.009890076662   |
| H15 | H16 | 0.04330678252    |
| N1  | H17 | 1.5998338055e-05 |
| C2  | H17 | 4.3259986938e-05 |
| C3  | H17 | 3.7340408817e-06 |
| O4  | H17 | 1.7084036482e-05 |

|     |     |                  |
|-----|-----|------------------|
| C5  | H17 | 0.00080666644604 |
| C6  | H17 | 0.0071034933135  |
| C7  | H17 | 0.040155297754   |
| C8  | H17 | 0.92720876329    |
| N9  | H17 | 0.064386325584   |
| N1  | H17 | 1.9249997751e-05 |
| H11 | H17 | 0.00036029971036 |
| H12 | H17 | 5.4401163767e-05 |
| H13 | H17 | 0.0070987741779  |
| H14 | H17 | 0.00053843164706 |
| H15 | H17 | 0.010869502602   |
| H16 | H17 | 0.0039545263348  |
| N1  | H18 | 2.9142424724e-05 |
| C2  | H18 | 4.2651083489e-05 |
| C3  | H18 | 5.5197362649e-06 |
| O4  | H18 | 5.6427284241e-05 |
| C5  | H18 | 0.00094806496713 |
| C6  | H18 | 0.0082068069837  |
| C7  | H18 | 0.041848621176   |
| C8  | H18 | 0.92713958755    |
| N9  | H18 | 0.076242767629   |
| N1  | H18 | 7.0931896371e-06 |
| H11 | H18 | 5.3105679572e-05 |
| H12 | H18 | 0.00039968106325 |
| H13 | H18 | 0.00067468089961 |
| H14 | H18 | 0.0074686187169  |
| H15 | H18 | 0.0037323030914  |
| H16 | H18 | 0.010848440753   |
| H17 | H18 | 0.04260693808    |
| N1  | H19 | 3.1942394551e-05 |
| C2  | H19 | 9.3454192463e-05 |
| C3  | H19 | 2.9041873738e-06 |
| O4  | H19 | 5.9183388937e-06 |
| C5  | H19 | 0.00030795381737 |
| C6  | H19 | 0.0016394821388  |
| C7  | H19 | 0.0085287905004  |
| C8  | H19 | 0.021316578964   |
| N9  | H19 | 0.88826968632    |
| N1  | H19 | 4.8299669305e-06 |
| H11 | H19 | 1.0762594294e-05 |
| H12 | H19 | 1.1059495796e-05 |
| H13 | H19 | 3.8431392832e-05 |
| H14 | H19 | 5.1259508613e-05 |
| H15 | H19 | 0.00066634233962 |
| H16 | H19 | 0.0005340078138  |
| H17 | H19 | 0.0023525144237  |
| H18 | H19 | 0.001935142748   |
| N1  | C2  | 2.7078625818e-06 |

|     |     |                  |
|-----|-----|------------------|
| C2  | C2  | 6.9724775625e-06 |
| C3  | C2  | 7.1539631484e-07 |
| O4  | C2  | 2.4768222379e-06 |
| C5  | C2  | 3.270134647e-05  |
| C6  | C2  | 0.00047678312022 |
| C7  | C2  | 0.0041634762476  |
| C8  | C2  | 0.021591703725   |
| N9  | C2  | 0.88781021238    |
| N1  | C2  | 2.6335294377e-06 |
| H11 | C2  | 1.2637395105e-05 |
| H12 | C2  | 3.4509376499e-06 |
| H13 | C2  | 0.00025694737877 |
| H14 | C2  | 4.3027630605e-05 |
| H15 | C2  | 0.0038886916608  |
| H16 | C2  | 0.00036484942417 |
| H17 | C2  | 0.0097614424887  |
| H18 | C2  | 0.0024314584736  |
| H19 | C2  | 0.018505320454   |
| N1  | H21 | 0.86729061735    |
| C2  | H21 | 0.020872608696   |
| C3  | H21 | 0.0014750490758  |
| O4  | H21 | 0.00062056740131 |
| C5  | H21 | 0.0060110470514  |
| C6  | H21 | 0.00068150454512 |
| C7  | H21 | 4.6510712552e-05 |
| C8  | H21 | 1.1903173575e-05 |
| N9  | H21 | 4.4409395082e-06 |
| N1  | H21 | 0.0086341308712  |
| H11 | H21 | 0.0024036598729  |
| H12 | H21 | 0.0015297341036  |
| H13 | H21 | 0.00020969873808 |
| H14 | H21 | 6.0019520017e-05 |
| H15 | H21 | 1.4980294714e-05 |
| H16 | H21 | 6.2451485081e-06 |
| H17 | H21 | 1.8574507703e-06 |
| H18 | H21 | 1.2953936394e-06 |
| H19 | H21 | 5.6080423614e-07 |
| C2  | H21 | 2.0981722826e-07 |
| N1  | H22 | 0.86344010435    |
| C2  | H22 | 0.020128727144   |
| C3  | H22 | 0.0066482315488  |
| O4  | H22 | 0.0021502055157  |
| C5  | H22 | 0.0022933497806  |
| C6  | H22 | 0.00023761968473 |
| C7  | H22 | 3.625664792e-05  |
| C8  | H22 | 8.7833674472e-06 |
| N9  | H22 | 3.5589778701e-06 |
| N1  | H22 | 0.0035931036255  |

|     |     |                  |
|-----|-----|------------------|
| H11 | H22 | 0.00023177718316 |
| H12 | H22 | 0.0022691076329  |
| H13 | H22 | 4.013196155e-05  |
| H14 | H22 | 5.7644424262e-05 |
| H15 | H22 | 2.9293176286e-06 |
| H16 | H22 | 4.5409382848e-06 |
| H17 | H22 | 6.767426388e-07  |
| H18 | H22 | 1.0407481535e-06 |
| H19 | H22 | 6.2609096665e-07 |
| C2  | H22 | 1.0941844432e-07 |
| H21 | H22 | 0.01705315386    |
| N1  | O23 | 0.082479642601   |
| C2  | O23 | 0.083540233855   |
| C3  | O23 | 0.73623202479    |
| O4  | O23 | 0.27843222249    |
| C5  | O23 | 0.0084782952795  |
| C6  | O23 | 0.00054668210153 |
| C7  | O23 | 0.00016184935126 |
| C8  | O23 | 2.6911467963e-05 |
| N9  | O23 | 9.0627376276e-06 |
| N1  | O23 | 0.0091179004599  |
| H11 | O23 | 0.0008967743197  |
| H12 | O23 | 0.0021399878129  |
| H13 | O23 | 0.00012166532707 |
| H14 | O23 | 0.00073782464732 |
| H15 | O23 | 2.1464096366e-05 |
| H16 | O23 | 5.674118163e-05  |
| H17 | O23 | 4.6244938372e-06 |
| H18 | O23 | 1.1380034663e-05 |
| H19 | O23 | 3.3954142157e-06 |
| C2  | O23 | 1.8399936581e-06 |
| H21 | O23 | 0.0017566785574  |
| H22 | O23 | 0.0028572059257  |
| N1  | H24 | 0.04583531186    |
| C2  | H24 | 0.0022615023735  |
| C3  | H24 | 0.0062995772203  |
| O4  | H24 | 0.0077688312409  |
| C5  | H24 | 0.00064500294561 |
| C6  | H24 | 0.00010444340163 |
| C7  | H24 | 1.5215404005e-05 |
| C8  | H24 | 5.8461569329e-06 |
| N9  | H24 | 1.4801970156e-06 |
| N1  | H24 | 0.00012297368795 |
| H11 | H24 | 2.9204621191e-05 |
| H12 | H24 | 9.867171848e-05  |
| H13 | H24 | 5.8327518508e-06 |
| H14 | H24 | 4.2682495368e-05 |
| H15 | H24 | 1.2473369342e-06 |

|     |     |                  |
|-----|-----|------------------|
| H16 | H24 | 2.6870576016e-06 |
| H17 | H24 | 1.7430957114e-07 |
| H18 | H24 | 6.8910724749e-07 |
| H19 | H24 | 3.6493510902e-07 |
| C2  | H24 | 6.5763853422e-08 |
| H21 | H24 | 0.00072273294595 |
| H22 | H24 | 0.00091811188137 |
| O23 | H24 | 0.48220786109    |

## ASPARTIC ACID

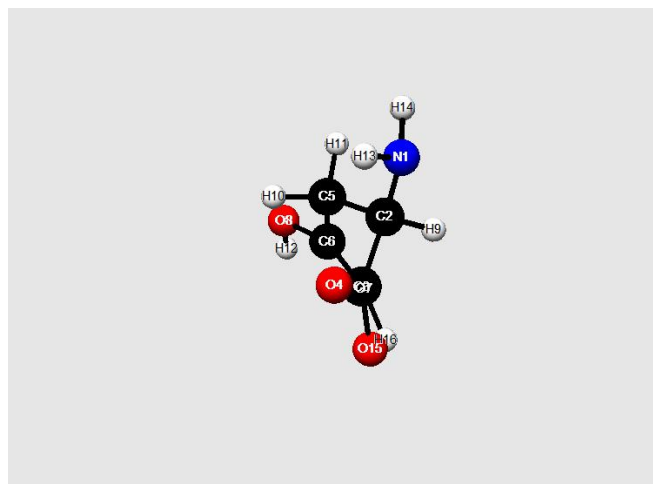

## HARTREE-FOCK

| Atom A | Atom B | Delocalization index |
|--------|--------|----------------------|
| N1     | C2     | 0.98292963767        |
| N1     | C3     | 0.052143353227       |
| C2     | C3     | 0.85262038142        |
| N1     | O4     | 0.060741942429       |
| C2     | O4     | 0.097569045687       |
| C3     | O4     | 1.1082837467         |
| N1     | C5     | 0.080426424682       |
| C2     | C5     | 0.92871270224        |
| C3     | C5     | 0.044603923493       |
| O4     | C5     | 0.016300252307       |
| N1     | C6     | 0.010940112486       |
| C2     | C6     | 0.031016719604       |
| C3     | C6     | 0.0018437076093      |
| O4     | C6     | 0.00073525694603     |
| C5     | C6     | 0.90091734956        |
| N1     | O7     | 0.0028509212724      |
| C2     | O7     | 0.021476669983       |
| C3     | O7     | 0.0020731714134      |
| O4     | O7     | 0.0017841509715      |
| C5     | O7     | 0.096385345726       |
| C6     | O7     | 1.0775090647         |
| N1     | O8     | 0.0025723782036      |
| C2     | O8     | 0.008959146444       |
| C3     | O8     | 0.00061928022302     |
| O4     | O8     | 0.00036462991085     |
| C5     | O8     | 0.089926302432       |
| C6     | O8     | 0.72762484295        |
| O7     | O8     | 0.29092977749        |
| N1     | H9     | 0.059542820575       |
| C2     | H9     | 0.90741084172        |

|     |     |                  |
|-----|-----|------------------|
| C3  | H9  | 0.034849271092   |
| O4  | H9  | 0.011343616162   |
| C5  | H9  | 0.038753664939   |
| C6  | H9  | 0.0039788249596  |
| O7  | H9  | 0.021355367587   |
| O8  | H9  | 0.00086281024169 |
| N1  | N1  | 0.0069647629018  |
| C2  | N1  | 0.032783398018   |
| C3  | N1  | 0.0060608508745  |
| O4  | N1  | 0.0067395404372  |
| C5  | N1  | 0.9346619008     |
| C6  | N1  | 0.04400214391    |
| O7  | N1  | 0.013308876771   |
| O8  | N1  | 0.01346581916    |
| H9  | N1  | 0.0088482809749  |
| N1  | H11 | 0.017414745296   |
| C2  | H11 | 0.032999342154   |
| C3  | H11 | 0.0075062374277  |
| O4  | H11 | 0.0026195902972  |
| C5  | H11 | 0.93176950214    |
| C6  | H11 | 0.045808689683   |
| O7  | H11 | 0.014142861555   |
| O8  | H11 | 0.015247916764   |
| H9  | H11 | 0.0019348018651  |
| N1  | H11 | 0.036324808345   |
| N1  | H12 | 0.00043443942421 |
| C2  | H12 | 0.0010371850798  |
| C3  | H12 | 4.0326138216e-05 |
| O4  | H12 | 2.8992723114e-05 |
| C5  | H12 | 0.006175160788   |
| C6  | H12 | 0.0081333482836  |
| O7  | H12 | 0.0097561275084  |
| O8  | H12 | 0.5332569459     |
| H9  | H12 | 2.0506105612e-05 |
| N1  | H12 | 0.00022742913766 |
| H11 | H12 | 0.00025960378087 |
| N1  | H13 | 0.81390695992    |
| C2  | H13 | 0.019773894188   |
| C3  | H13 | 0.0034239730651  |
| O4  | H13 | 0.028088849397   |
| C5  | H13 | 0.0019440514233  |
| C6  | H13 | 0.0002440541508  |
| O7  | H13 | 0.0003578270232  |
| O8  | H13 | 5.8248606922e-05 |
| H9  | H13 | 0.0074600578083  |
| N1  | H13 | 0.00055653127538 |
| H11 | H13 | 0.00031662509749 |
| H12 | H13 | 8.1756504739e-06 |



|     |     |                  |
|-----|-----|------------------|
| N1  | H14 | 0.87430310926    |
| C2  | H14 | 0.021602960947   |
| C3  | H14 | 0.0068056468426  |
| O4  | H14 | 0.0031086080654  |
| C5  | H14 | 0.0074830728115  |
| C6  | H14 | 0.0004279878917  |
| O7  | H14 | 0.00023317773519 |
| O8  | H14 | 0.00011790509905 |
| H9  | H14 | 0.00098749810675 |
| N1  | H14 | 0.00031932479978 |
| H11 | H14 | 0.0061360008109  |
| H12 | H14 | 1.115400375e-05  |
| H13 | H14 | 0.015483184793   |
| N1  | O15 | 0.01123529423    |
| C2  | O15 | 0.089643366238   |
| C3  | O15 | 0.73651903925    |
| O4  | O15 | 0.27924018698    |
| C5  | O15 | 0.010526447914   |
| C6  | O15 | 0.0042778959789  |
| O7  | O15 | 0.058508739767   |
| O8  | O15 | 0.001458904362   |
| H9  | O15 | 0.015964436501   |
| N1  | O15 | 0.0011822127253  |
| H11 | O15 | 0.0014871152097  |
| H12 | O15 | 3.3329101127e-05 |
| H13 | O15 | 0.00095505316172 |
| H14 | O15 | 0.0018451639334  |
| N1  | H16 | 0.00028655521595 |
| C2  | H16 | 0.0022355599084  |
| C3  | H16 | 0.0059425959408  |
| O4  | H16 | 0.0077046337519  |
| C5  | H16 | 0.00040654117625 |
| C6  | H16 | 0.0012605908335  |
| O7  | H16 | 0.040915444448   |
| O8  | H16 | 0.0011395733997  |
| H9  | H16 | 0.001544314379   |
| N1  | H16 | 4.7751060598e-05 |
| H11 | H16 | 4.8078359877e-05 |
| H12 | H16 | 1.2784818831e-05 |
| H13 | H16 | 5.9123102564e-05 |
| H14 | H16 | 3.3569080482e-05 |
| O15 | H16 | 0.47005432164    |

## ALANINE

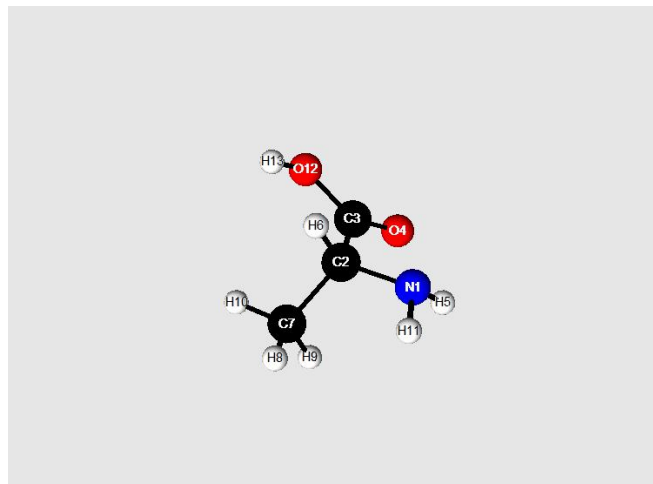

## HARTREE-FOCK

| Atom A | Atom B | Delocalization index |
|--------|--------|----------------------|
| N1     | C2     | 0.97797736052        |
| N1     | C3     | 0.05536889223        |
| C2     | C3     | 0.85741878104        |
| N1     | O4     | 0.053230315766       |
| C2     | O4     | 0.09401082454        |
| C3     | O4     | 1.1170636248         |
| N1     | H5     | 0.82414827032        |
| C2     | H5     | 0.019860448054       |
| C3     | H5     | 0.0033809144346      |
| O4     | H5     | 0.024993285198       |
| N1     | H6     | 0.063275458518       |
| C2     | H6     | 0.91323241675        |
| C3     | H6     | 0.037854912841       |
| O4     | H6     | 0.011860291091       |
| H5     | H6     | 0.0081938791569      |
| N1     | C7     | 0.076561683506       |
| C2     | C7     | 0.94097533784        |
| C3     | C7     | 0.046763770293       |
| O4     | C7     | 0.018726092172       |
| H5     | C7     | 0.0021408871867      |
| H6     | C7     | 0.041129684315       |
| N1     | H8     | 0.010684450183       |
| C2     | H8     | 0.040781604595       |
| C3     | H8     | 0.0093560204679      |
| O4     | H8     | 0.0037622650937      |
| H5     | H8     | 0.00025755131021     |
| H6     | H8     | 0.0040272860678      |
| C7     | H8     | 0.96111222142        |
| N1     | H9     | 0.011907871162       |
| C2     | H9     | 0.039081743532       |

|     |     |                  |
|-----|-----|------------------|
| C3  | H9  | 0.0047235193386  |
| O4  | H9  | 0.0075939315219  |
| H5  | H9  | 0.0011004693795  |
| H6  | H9  | 0.010632459141   |
| C7  | H9  | 0.95718268491    |
| H8  | H9  | 0.040928365481   |
| N1  | N1  | 0.01565229887    |
| C2  | N1  | 0.039392937855   |
| C3  | N1  | 0.0037699296182  |
| O4  | N1  | 0.0010754512168  |
| H5  | N1  | 0.00033631096258 |
| H6  | N1  | 0.003362518659   |
| C7  | N1  | 0.96288277448    |
| H8  | N1  | 0.041920082871   |
| H9  | N1  | 0.040698497978   |
| N1  | H11 | 0.87555779167    |
| C2  | H11 | 0.021469654384   |
| C3  | H11 | 0.0070573468357  |
| O4  | H11 | 0.0027691066585  |
| H5  | H11 | 0.015745907508   |
| H6  | H11 | 0.0010509756212  |
| C7  | H11 | 0.0072509181177  |
| H8  | H11 | 0.0044045432168  |
| H9  | H11 | 0.00053134827981 |
| N1  | H11 | 0.00063845053593 |
| N1  | O12 | 0.011185051197   |
| C2  | O12 | 0.08894423271    |
| C3  | O12 | 0.71570281842    |
| O4  | O12 | 0.27534887       |
| H5  | O12 | 0.00093373083521 |
| H6  | O12 | 0.02111844599    |
| C7  | O12 | 0.015071322826   |
| H8  | O12 | 0.0021090876834  |
| H9  | O12 | 0.0010222624167  |
| N1  | O12 | 0.011319248569   |
| H11 | O12 | 0.0018105722716  |
| N1  | H13 | 0.0007973904162  |
| C2  | H13 | 0.004748560406   |
| C3  | H13 | 0.0072283599749  |
| O4  | H13 | 0.010327642493   |
| H5  | H13 | 0.00016274347868 |
| H6  | H13 | 0.0051477512421  |
| C7  | H13 | 0.00077783313094 |
| H8  | H13 | 9.6451194585e-05 |
| H9  | H13 | 0.00010265843637 |
| N1  | H13 | 0.00082183909885 |
| H11 | H13 | 3.853160498e-05  |
| O12 | H13 | 0.56401494799    |



## GLYCINE

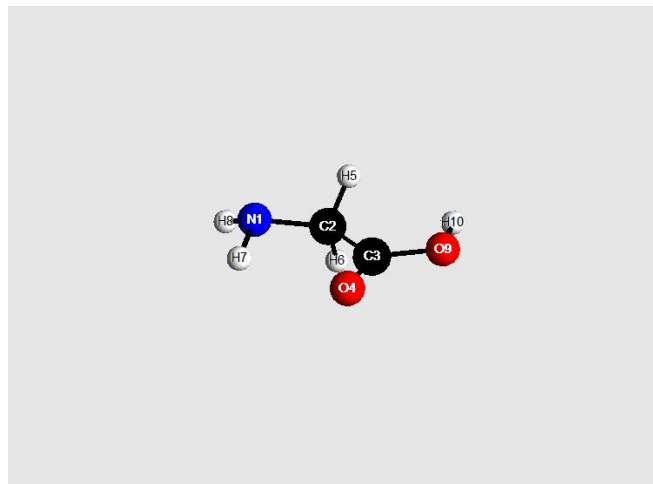

### HARTREE-FOCK

| Atom A | Atom B | Delocalization index |
|--------|--------|----------------------|
| N1     | C2     | 1.0022004108         |
| N1     | C3     | 0.05203165541        |
| C2     | C3     | 0.87273127585        |
| N1     | O4     | 0.052786198157       |
| C2     | O4     | 0.098445099765       |
| C3     | O4     | 1.1219839913         |
| N1     | H5     | 0.06189290575        |
| C2     | H5     | 0.92391599792        |
| C3     | H5     | 0.040781258517       |
| O4     | H5     | 0.013920928318       |
| N1     | H6     | 0.069243934596       |
| C2     | H6     | 0.92222411725        |
| C3     | H6     | 0.047896371899       |
| O4     | H6     | 0.015866459072       |
| H5     | H6     | 0.04038039221        |
| N1     | H7     | 0.81944355419        |
| C2     | H7     | 0.020066304876       |
| C3     | H7     | 0.0038027424998      |
| O4     | H7     | 0.026489656201       |
| H5     | H7     | 0.0075690808748      |
| H6     | H7     | 0.0013349077453      |
| N1     | H8     | 0.87645488115        |
| C2     | H8     | 0.022230095164       |
| C3     | H8     | 0.0063338478549      |
| O4     | H8     | 0.0026582895203      |
| H5     | H8     | 0.0010254818381      |
| H6     | H8     | 0.0039149087808      |
| H7     | H8     | 0.015561258681       |
| N1     | O9     | 0.013772478187       |
| C2     | O9     | 0.095772016427       |

|    |    |                  |
|----|----|------------------|
| C3 | O9 | 0.71538037115    |
| O4 | O9 | 0.2738680849     |
| H5 | O9 | 0.01864471972    |
| H6 | O9 | 0.01289471595    |
| H7 | O9 | 0.0010036904476  |
| H8 | O9 | 0.001674462798   |
| N1 | N1 | 0.00082065800359 |
| C2 | N1 | 0.0048555999978  |
| C3 | N1 | 0.0072995496999  |
| O4 | N1 | 0.010425486728   |
| H5 | N1 | 0.0037596791227  |
| H6 | N1 | 0.00063248695941 |
| H7 | N1 | 0.0001491947813  |
| H8 | N1 | 3.8257525476e-05 |
| O9 | N1 | 0.56694999155    |

# METHIONINE

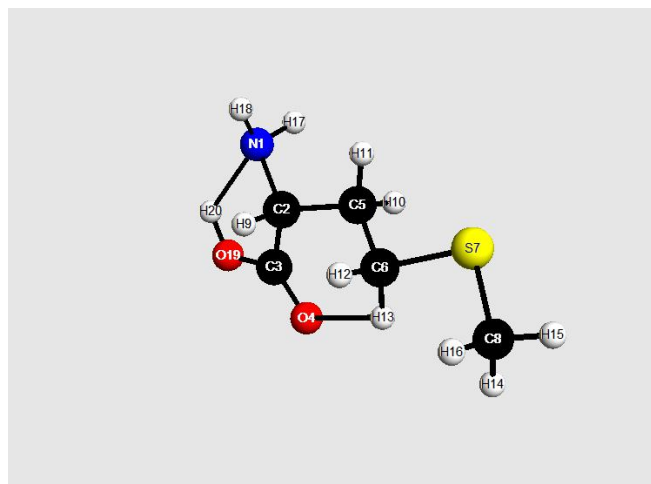

## HARTREE-FOCK

| Atom A | Atom B | Delocalization index |
|--------|--------|----------------------|
| N1     | C2     | 0.94354774605        |
| N1     | C3     | 0.055737288525       |
| C2     | C3     | 0.85473739176        |
| N1     | O4     | 0.014160414798       |
| C2     | O4     | 0.10176209969        |
| C3     | O4     | 1.106194472          |
| N1     | C5     | 0.073064211622       |
| C2     | C5     | 0.93639277749        |
| C3     | C5     | 0.03342790362        |
| O4     | C5     | 0.022920428634       |
| N1     | C6     | 0.012093872149       |
| C2     | C6     | 0.038789732942       |
| C3     | C6     | 0.0018910910359      |
| O4     | C6     | 0.022514267403       |
| C5     | C6     | 0.97442912658        |
| N1     | S7     | 0.0024490461555      |
| C2     | S7     | 0.011888819413       |
| C3     | S7     | 0.00063424854896     |
| O4     | S7     | 0.0037793402802      |
| C5     | S7     | 0.062913451746       |
| C6     | S7     | 1.0697151025         |
| N1     | C8     | 0.00051141824582     |
| C2     | C8     | 0.0019267789541      |
| C3     | C8     | 8.448753361e-05      |
| O4     | C8     | 0.00011848861783     |
| C5     | C8     | 0.0093449295271      |
| C6     | C8     | 0.042482105223       |
| S7     | C8     | 1.0957756795         |
| N1     | H9     | 0.060531055411       |
| C2     | H9     | 0.90847188213        |

|     |     |                  |
|-----|-----|------------------|
| C3  | H9  | 0.044033310915   |
| O4  | H9  | 0.015428764293   |
| C5  | H9  | 0.034535025292   |
| C6  | H9  | 0.0093365781686  |
| S7  | H9  | 0.0018894636659  |
| C8  | H9  | 6.7713332313e-05 |
| N1  | N1  | 0.0064981221079  |
| C2  | N1  | 0.04030967943    |
| C3  | N1  | 0.0052364323964  |
| O4  | N1  | 0.0093248340185  |
| C5  | N1  | 0.94029133401    |
| C6  | N1  | 0.039784893759   |
| S7  | N1  | 0.015364700527   |
| C8  | N1  | 0.00082263150591 |
| H9  | N1  | 0.0092596015264  |
| N1  | H11 | 0.021420571583   |
| C2  | H11 | 0.041010787723   |
| C3  | H11 | 0.0071444895873  |
| O4  | H11 | 0.0022154946934  |
| C5  | H11 | 0.93795377027    |
| C6  | H11 | 0.041342430728   |
| S7  | H11 | 0.021157410411   |
| C8  | H11 | 0.0014962166077  |
| H9  | H11 | 0.002227079057   |
| N1  | H11 | 0.040052755151   |
| N1  | H12 | 0.00080365465414 |
| C2  | H12 | 0.0076703388989  |
| C3  | H12 | 0.00044277553919 |
| O4  | H12 | 0.0014675478004  |
| C5  | H12 | 0.038979850739   |
| C6  | H12 | 0.94876609448    |
| S7  | H12 | 0.063456256976   |
| C8  | H12 | 0.005125084939   |
| H9  | H12 | 0.0083996356323  |
| N1  | H12 | 0.010221501189   |
| H11 | H12 | 0.0028603847825  |
| N1  | H13 | 0.00054557676703 |
| C2  | H13 | 0.0020115785168  |
| C3  | H13 | 0.00087128601551 |
| O4  | H13 | 0.034779970875   |
| C5  | H13 | 0.033774698863   |
| C6  | H13 | 0.92998852936    |
| S7  | H13 | 0.053512061291   |
| C8  | H13 | 0.0068717888427  |
| H9  | H13 | 0.00039220679985 |
| N1  | H13 | 0.0033290024748  |
| H11 | H13 | 0.0095546974145  |
| H12 | H13 | 0.035470865721   |



|     |     |                  |
|-----|-----|------------------|
| N1  | H14 | 2.758198076e-05  |
| C2  | H14 | 5.721370135e-05  |
| C3  | H14 | 8.8183324549e-06 |
| O4  | H14 | 6.4417764775e-05 |
| C5  | H14 | 0.00063199797534 |
| C6  | H14 | 0.0056336669973  |
| S7  | H14 | 0.062937764346   |
| C8  | H14 | 0.96222919907    |
| H9  | H14 | 5.0675556543e-06 |
| N1  | H14 | 5.5854569744e-05 |
| H11 | H14 | 0.00040339091968 |
| H12 | H14 | 0.00036416685324 |
| H13 | H14 | 0.0048008649227  |
| N1  | H15 | 0.00016830886623 |
| C2  | H15 | 0.00045507539783 |
| C3  | H15 | 1.4012353192e-05 |
| O4  | H15 | 3.0606875154e-05 |
| C5  | H15 | 0.001809295183   |
| C6  | H15 | 0.0099989716824  |
| S7  | H15 | 0.052477331457   |
| C8  | H15 | 0.96655895521    |
| H9  | H15 | 2.2413129563e-05 |
| N1  | H15 | 4.5923844663e-05 |
| H11 | H15 | 6.8636726862e-05 |
| H12 | H15 | 0.00058254856378 |
| H13 | H15 | 0.00074383440376 |
| H14 | H15 | 0.037558235481   |
| N1  | H16 | 1.9759589741e-05 |
| C2  | H16 | 6.9791098975e-05 |
| C3  | H16 | 4.6686377932e-06 |
| O4  | H16 | 1.3377271279e-05 |
| C5  | H16 | 0.00073391025618 |
| C6  | H16 | 0.0054367212683  |
| S7  | H16 | 0.063612818931   |
| C8  | H16 | 0.96419490303    |
| H9  | H16 | 2.6758685972e-05 |
| N1  | H16 | 0.00034074069395 |
| H11 | H16 | 7.2837401309e-05 |
| H12 | H16 | 0.0040083931461  |
| H13 | H16 | 0.00042162058563 |
| H14 | H16 | 0.038422127797   |
| H15 | H16 | 0.038114461286   |
| N1  | H17 | 0.86420080951    |
| C2  | H17 | 0.020798885757   |
| C3  | H17 | 0.0013781955555  |
| O4  | H17 | 0.00060761746448 |
| C5  | H17 | 0.0064635498896  |
| C6  | H17 | 0.00068534955568 |

|     |     |                  |
|-----|-----|------------------|
| S7  | H17 | 8.9777324408e-05 |
| C8  | H17 | 1.522347629e-05  |
| H9  | H17 | 0.0084325930761  |
| N1  | H17 | 0.0029230978311  |
| H11 | H17 | 0.0012973846384  |
| H12 | H17 | 0.00023046291104 |
| H13 | H17 | 3.5918064361e-05 |
| H14 | H17 | 9.700143783e-07  |
| H15 | H17 | 3.446525427e-06  |
| H16 | H17 | 2.3017739467e-06 |
| N1  | H18 | 0.86050340898    |
| C2  | H18 | 0.020094309783   |
| C3  | H18 | 0.0064259030423  |
| O4  | H18 | 0.0021115466836  |
| C5  | H18 | 0.0022296691856  |
| C6  | H18 | 0.00025269050453 |
| S7  | H18 | 6.5874744197e-05 |
| C8  | H18 | 1.2197941519e-05 |
| H9  | H18 | 0.0036916893793  |
| N1  | H18 | 0.00024169259379 |
| H11 | H18 | 0.0020572864133  |
| H12 | H18 | 3.6994217929e-05 |
| H13 | H18 | 5.633128677e-05  |
| H14 | H18 | 1.1930959769e-06 |
| H15 | H18 | 3.3618280025e-06 |
| H16 | H18 | 9.3046241964e-07 |
| H17 | H18 | 0.016838402831   |
| N1  | O19 | 0.083769761039   |
| C2  | O19 | 0.083461831133   |
| C3  | O19 | 0.73820490481    |
| O4  | O19 | 0.27853343906    |
| C5  | O19 | 0.0083637330287  |
| C6  | O19 | 0.00062362579317 |
| S7  | O19 | 0.0003262695552  |
| C8  | O19 | 4.7647566024e-05 |
| H9  | O19 | 0.008535975951   |
| N1  | O19 | 0.00079096618426 |
| H11 | O19 | 0.0021069307358  |
| H12 | O19 | 0.00013990052443 |
| H13 | O19 | 0.00074053228116 |
| H14 | O19 | 1.3696973887e-05 |
| H15 | O19 | 1.0637259304e-05 |
| H16 | O19 | 6.6235426991e-06 |
| H17 | O19 | 0.0017775332874  |
| H18 | O19 | 0.0028516081877  |
| N1  | C2  | 0.047028974688   |
| C2  | C2  | 0.0022581583664  |
| C3  | C2  | 0.006252547256   |

|     |    |                  |
|-----|----|------------------|
| O4  | C2 | 0.0076622535193  |
| C5  | C2 | 0.00065555972878 |
| C6  | C2 | 0.00011550296108 |
| S7  | C2 | 2.2825563026e-05 |
| C8  | C2 | 7.8466193117e-06 |
| H9  | C2 | 0.00010879279216 |
| N1  | C2 | 2.4428898665e-05 |
| H11 | C2 | 9.5509354083e-05 |
| H12 | C2 | 5.7306726609e-06 |
| H13 | C2 | 4.85399558e-05   |
| H14 | C2 | 7.3840121081e-07 |
| H15 | C2 | 1.786405841e-06  |
| H16 | C2 | 2.6138441523e-07 |
| H17 | C2 | 0.0007237099374  |
| H18 | C2 | 0.0009429529004  |
| O19 | C2 | 0.47871568874    |

## GLUTAMINE

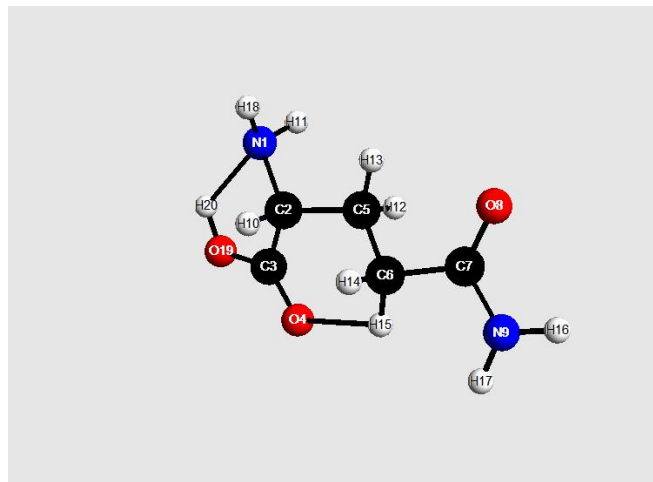

## HARTREE-FOCK

| Atom A | Atom B | Delocalization index |
|--------|--------|----------------------|
| N1     | C2     | 0.94331930981        |
| N1     | C3     | 0.055947545543       |
| C2     | C3     | 0.85508395419        |
| N1     | O4     | 0.014069613277       |
| C2     | O4     | 0.10105138392        |
| C3     | O4     | 1.1013613743         |
| N1     | C5     | 0.073228113027       |
| C2     | C5     | 0.93965596143        |
| C3     | C5     | 0.033884133001       |
| O4     | C5     | 0.022469783632       |
| N1     | C6     | 0.012141945346       |
| C2     | C6     | 0.039288146257       |
| C3     | C6     | 0.001916558833       |
| O4     | C6     | 0.023438529239       |
| C5     | C6     | 0.96686155927        |
| N1     | C7     | 0.0016163154885      |
| C2     | C7     | 0.0071502991074      |
| C3     | C7     | 0.00019894967189     |
| O4     | C7     | 0.0019325210994      |
| C5     | C7     | 0.034326273224       |
| C6     | C7     | 0.89602874624        |
| N1     | O8     | 0.00034767507464     |
| C2     | O8     | 0.0033393863123      |
| C3     | O8     | 0.00043484474813     |
| O4     | O8     | 0.0010138102893      |
| C5     | O8     | 0.032943780203       |
| C6     | O8     | 0.10387249843        |
| C7     | O8     | 1.1039329888         |
| N1     | N9     | 0.00054014773582     |
| C2     | N9     | 0.0013588706071      |

|     |     |                  |
|-----|-----|------------------|
| C3  | N9  | 3.6196725203e-05 |
| O4  | N9  | 0.00027198322533 |
| C5  | N9  | 0.0088286321637  |
| C6  | N9  | 0.087069986356   |
| C7  | N9  | 0.88631216642    |
| O8  | N9  | 0.26901637404    |
| N1  | N1  | 0.060617314183   |
| C2  | N1  | 0.9087154987     |
| C3  | N1  | 0.044732721962   |
| O4  | N1  | 0.015550373898   |
| C5  | N1  | 0.034460458503   |
| C6  | N1  | 0.0092255364519  |
| C7  | N1  | 0.0007538125457  |
| O8  | N1  | 0.00046602623658 |
| N9  | N1  | 0.00019855785143 |
| N1  | H11 | 0.86346825638    |
| C2  | H11 | 0.020741751063   |
| C3  | H11 | 0.0013658112956  |
| O4  | H11 | 0.00060674692499 |
| C5  | H11 | 0.0067479165433  |
| C6  | H11 | 0.00070426854217 |
| C7  | H11 | 4.2164582516e-05 |
| O8  | H11 | 4.0523547388e-05 |
| N9  | H11 | 1.6441055725e-05 |
| N1  | H11 | 0.008359362508   |
| N1  | H12 | 0.0068320454925  |
| C2  | H12 | 0.041579621346   |
| C3  | H12 | 0.0053169098886  |
| O4  | H12 | 0.0088649202604  |
| C5  | H12 | 0.94255213825    |
| C6  | H12 | 0.040616046387   |
| C7  | H12 | 0.0035226251442  |
| O8  | H12 | 0.0070767197693  |
| N9  | H12 | 0.00069717885082 |
| N1  | H12 | 0.0095736464527  |
| H11 | H12 | 0.0031724262266  |
| N1  | H13 | 0.019947130482   |
| C2  | H13 | 0.03900406301    |
| C3  | H13 | 0.0070129339998  |
| O4  | H13 | 0.0021603112059  |
| C5  | H13 | 0.93072321034    |
| C6  | H13 | 0.037878011823   |
| C7  | H13 | 0.0035650246141  |
| O8  | H13 | 0.028215351058   |
| N9  | H13 | 0.00098604724583 |
| N1  | H13 | 0.0021970719065  |
| H11 | H13 | 0.0012497895592  |
| H12 | H13 | 0.038601400818   |

|     |     |                  |
|-----|-----|------------------|
| N1  | H14 | 0.00083892038206 |
| C2  | H14 | 0.007512287044   |
| C3  | H14 | 0.0004378469079  |
| O4  | H14 | 0.0014557172502  |
| C5  | H14 | 0.038492369162   |
| C6  | H14 | 0.94162496151    |
| C7  | H14 | 0.046805763453   |
| O8  | H14 | 0.015132701996   |
| N9  | H14 | 0.012441809903   |
| N1  | H14 | 0.0078228296114  |
| H11 | H14 | 0.000226519697   |
| H12 | H14 | 0.010363779734   |
| H13 | H14 | 0.0028833050672  |
| N1  | H15 | 0.00054578186393 |
| C2  | H15 | 0.0021157330549  |
| C3  | H15 | 0.00093290681    |
| O4  | H15 | 0.037784922832   |
| C5  | H15 | 0.034594331258   |
| C6  | H15 | 0.92969766157    |
| C7  | H15 | 0.034742499179   |
| O8  | H15 | 0.011626751079   |
| N9  | H15 | 0.017511612449   |
| N1  | H15 | 0.00037520948218 |
| H11 | H15 | 3.749116073e-05  |
| H12 | H15 | 0.0032373614676  |
| H13 | H15 | 0.00921017372    |
| H14 | H15 | 0.037782010117   |
| N1  | H16 | 0.00012548158965 |
| C2  | H16 | 0.00027511229836 |
| C3  | H16 | 5.7383474461e-06 |
| O4  | H16 | 1.3146574238e-05 |
| C5  | H16 | 0.0013209365279  |
| C6  | H16 | 0.0077078369733  |
| C7  | H16 | 0.014933930872   |
| O8  | H16 | 0.011793884296   |
| N9  | H16 | 0.80148277881    |
| N1  | H16 | 1.9610695418e-05 |
| H11 | H16 | 2.1839936687e-06 |
| H12 | H16 | 3.2739645198e-05 |
| H13 | H16 | 3.8775576845e-05 |
| H14 | H16 | 0.00036527612211 |
| H15 | H16 | 0.00064003988516 |
| N1  | H17 | 1.8422066646e-05 |
| C2  | H17 | 4.2548516976e-05 |
| C3  | H17 | 5.0085256074e-06 |
| O4  | H17 | 5.5740533544e-05 |
| C5  | H17 | 0.00059425593372 |
| C6  | H17 | 0.0055541392913  |

|     |     |                  |
|-----|-----|------------------|
| C7  | H17 | 0.013991607124   |
| O8  | H17 | 0.014542028893   |
| N9  | H17 | 0.81377066532    |
| N1  | H17 | 3.6676632901e-06 |
| H11 | H17 | 8.7976980495e-07 |
| H12 | H17 | 2.978900247e-05  |
| H13 | H17 | 0.00021706860514 |
| H14 | H17 | 0.00029022784651 |
| H15 | H17 | 0.0051705908251  |
| H16 | H17 | 0.014709230105   |
| N1  | H18 | 0.85973980098    |
| C2  | H18 | 0.020040366087   |
| C3  | H18 | 0.0063554640111  |
| O4  | H18 | 0.0020734743166  |
| C5  | H18 | 0.0022233377081  |
| C6  | H18 | 0.00025287344591 |
| C7  | H18 | 3.2329007427e-05 |
| O8  | H18 | 1.9853542161e-05 |
| N9  | H18 | 1.0990179272e-05 |
| N1  | H18 | 0.0037857423067  |
| H11 | H18 | 0.016747268558   |
| H12 | H18 | 0.00025132797664 |
| H13 | H18 | 0.0018655386832  |
| H14 | H18 | 3.7678646519e-05 |
| H15 | H18 | 5.16955106e-05   |
| H16 | H18 | 2.1558658062e-06 |
| H17 | H18 | 6.2310425559e-07 |
| N1  | O19 | 0.084855540315   |
| C2  | O19 | 0.082885167828   |
| C3  | O19 | 0.74057500587    |
| O4  | O19 | 0.2787964336     |
| C5  | O19 | 0.008329637581   |
| C6  | O19 | 0.00063078915862 |
| C7  | O19 | 0.00012971095608 |
| O8  | O19 | 0.00017125008971 |
| N9  | O19 | 2.832660154e-05  |
| N1  | O19 | 0.0084609160349  |
| H11 | O19 | 0.0017855343776  |
| H12 | O19 | 0.00079491556916 |
| H13 | O19 | 0.002012267716   |
| H14 | O19 | 0.00013623826724 |
| H15 | O19 | 0.00079598297444 |
| H16 | O19 | 4.4611406961e-06 |
| H17 | O19 | 1.1097587045e-05 |
| H18 | O19 | 0.0028804856026  |
| N1  | C2  | 0.048248819889   |
| C2  | C2  | 0.002274845311   |
| C3  | C2  | 0.0062624177382  |

|     |    |                  |
|-----|----|------------------|
| O4  | C2 | 0.0075748352424  |
| C5  | C2 | 0.00066072727727 |
| C6  | C2 | 0.00011819814451 |
| C7  | C2 | 1.1878790765e-05 |
| O8  | C2 | 6.6298925729e-06 |
| N9  | C2 | 5.8686225464e-06 |
| N1  | C2 | 0.00010759373047 |
| H11 | C2 | 0.00073994120846 |
| H12 | C2 | 2.4102394241e-05 |
| H13 | C2 | 8.9675673701e-05 |
| H14 | C2 | 6.2980974129e-06 |
| H15 | C2 | 5.179369753e-05  |
| H16 | C2 | 1.3138889049e-06 |
| H17 | C2 | 5.2098420784e-07 |
| H18 | C2 | 0.00097276302464 |
| O19 | C2 | 0.47585649525    |



## ARGININE

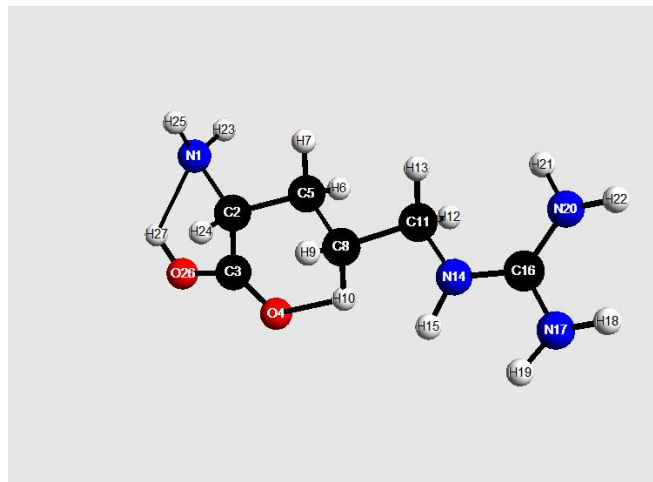

### HARTREE-FOCK

| Atom A | Atom B | Delocalization index |
|--------|--------|----------------------|
| N1     | C2     | 0.94840031684        |
| N1     | C3     | 0.056145534449       |
| C2     | C3     | 0.85337882142        |
| N1     | O4     | 0.014218482464       |
| C2     | O4     | 0.10192358521        |
| C3     | O4     | 1.1044378052         |
| N1     | C5     | 0.073313498372       |
| C2     | C5     | 0.93781841878        |
| C3     | C5     | 0.033356725409       |
| O4     | C5     | 0.024783675995       |
| N1     | H6     | 0.0061177189841      |
| C2     | H6     | 0.040232597827       |
| C3     | H6     | 0.0055030174948      |
| O4     | H6     | 0.01228015149        |
| C5     | H6     | 0.94090553033        |
| N1     | H7     | 0.021480378392       |
| C2     | H7     | 0.040734470424       |
| C3     | H7     | 0.0070430797672      |
| O4     | H7     | 0.0024158689779      |
| C5     | H7     | 0.94171463585        |
| H6     | H7     | 0.040999771599       |
| N1     | C8     | 0.011718661028       |
| C2     | C8     | 0.037926457576       |
| C3     | C8     | 0.0018746505377      |
| O4     | C8     | 0.021771861021       |
| C5     | C8     | 0.96526306856        |
| H6     | C8     | 0.038738275179       |
| H7     | C8     | 0.040478658336       |
| N1     | H9     | 0.00073093371354     |
| C2     | H9     | 0.0068199611525      |

|     |     |                  |
|-----|-----|------------------|
| C3  | H9  | 0.00040201471651 |
| O4  | H9  | 0.0013696753547  |
| C5  | H9  | 0.040083391785   |
| H6  | H9  | 0.010274899685   |
| H7  | H9  | 0.0036728770713  |
| C8  | H9  | 0.94415551428    |
| N1  | N1  | 0.00055811527321 |
| C2  | N1  | 0.0028214044836  |
| C3  | N1  | 0.0011626190968  |
| O4  | N1  | 0.037916755912   |
| C5  | N1  | 0.035119376943   |
| H6  | N1  | 0.0026960506352  |
| H7  | N1  | 0.0097261118389  |
| C8  | N1  | 0.92751260799    |
| H9  | N1  | 0.037969805007   |
| N1  | C11 | 0.0018084136773  |
| C2  | C11 | 0.008372834784   |
| C3  | C11 | 0.00030709330835 |
| O4  | C11 | 0.0017961334994  |
| C5  | C11 | 0.045449802697   |
| H6  | C11 | 0.0072019529923  |
| H7  | C11 | 0.007745931354   |
| C8  | C11 | 0.94593352156    |
| H9  | C11 | 0.042504707494   |
| N1  | C11 | 0.038347274459   |
| N1  | H12 | 9.7663598594e-05 |
| C2  | H12 | 0.0007806763083  |
| C3  | H12 | 3.8034915379e-05 |
| O4  | H12 | 0.00020044444264 |
| C5  | H12 | 0.0072345705259  |
| H6  | H12 | 0.0066454218277  |
| H7  | H12 | 0.00058200589909 |
| C8  | H12 | 0.034560129183   |
| H9  | H12 | 0.010017436751   |
| N1  | H12 | 0.0032049518186  |
| C11 | H12 | 0.91836640074    |
| N1  | H13 | 6.4032149127e-05 |
| C2  | H13 | 0.00071247716352 |
| C3  | H13 | 0.00015108513146 |
| O4  | H13 | 0.00051287531249 |
| C5  | H13 | 0.0072566911106  |
| H6  | H13 | 0.00054984610131 |
| H7  | H13 | 0.0071466457575  |
| C8  | H13 | 0.034640202259   |
| H9  | H13 | 0.0039598567953  |
| N1  | H13 | 0.0089486884181  |
| C11 | H13 | 0.9153372829     |
| H12 | H13 | 0.037568589287   |

|     |     |                  |
|-----|-----|------------------|
| N1  | N14 | 0.00056202477406 |
| C2  | N14 | 0.0016562153988  |
| C3  | N14 | 5.6439238934e-05 |
| O4  | N14 | 0.00019025045933 |
| C5  | N14 | 0.010803709418   |
| H6  | N14 | 0.001155463369   |
| H7  | N14 | 0.0011556107243  |
| C8  | N14 | 0.074071571023   |
| H9  | N14 | 0.013245388742   |
| N1  | N14 | 0.010822086002   |
| C11 | N14 | 0.83704930237    |
| H12 | N14 | 0.068964873196   |
| H13 | N14 | 0.068064376851   |
| N1  | H15 | 2.3476183603e-05 |
| C2  | H15 | 2.9576002453e-05 |
| C3  | H15 | 5.4498227354e-06 |
| O4  | H15 | 8.3818566623e-05 |
| C5  | H15 | 0.00084959117077 |
| H6  | H15 | 0.00011304951038 |
| H7  | H15 | 0.00024636019442 |
| C8  | H15 | 0.0077918062757  |
| H9  | H15 | 0.0021588360215  |
| N1  | H15 | 0.003566079524   |
| C11 | H15 | 0.014505749354   |
| H12 | H15 | 0.0023658598947  |
| H13 | H15 | 0.004658067287   |
| N14 | H15 | 0.77295835391    |
| N1  | C16 | 7.750666466e-05  |
| C2  | C16 | 0.00018351505691 |
| C3  | C16 | 6.0686746151e-06 |
| O4  | C16 | 1.6119183727e-05 |
| C5  | C16 | 0.0010435885011  |
| H6  | C16 | 7.6189598061e-05 |
| H7  | C16 | 0.00010186590173 |
| C8  | C16 | 0.0048618200154  |
| H9  | C16 | 0.00048271515282 |
| N1  | C16 | 0.00034629040359 |
| C11 | C16 | 0.017027993903   |
| H12 | C16 | 0.0046055662362  |
| H13 | C16 | 0.0040419248916  |
| N14 | C16 | 0.98384428232    |
| H15 | C16 | 0.015037906757   |
| N1  | N17 | 3.4516927451e-05 |
| C2  | N17 | 7.682294278e-05  |
| C3  | N17 | 4.4706690129e-06 |
| O4  | N17 | 9.212963141e-05  |
| C5  | N17 | 0.00039387839626 |
| H6  | N17 | 0.00016067734641 |

|     |     |                  |
|-----|-----|------------------|
| H7  | N17 | 0.00046437344529 |
| C8  | N17 | 0.0014526601632  |
| H9  | N17 | 0.0020763362106  |
| N1  | N17 | 0.00050667526018 |
| C11 | N17 | 0.0097896585357  |
| H12 | N17 | 0.0043764396356  |
| H13 | N17 | 0.0069648960079  |
| N14 | N17 | 0.18362113023    |
| H15 | N17 | 0.014592071175   |
| C16 | N17 | 1.0187466764     |
| N1  | H18 | 2.1015013646e-05 |
| C2  | H18 | 2.9278565963e-05 |
| C3  | H18 | 2.4959297683e-06 |
| O4  | H18 | 0.00013606653982 |
| C5  | H18 | 0.00015564634436 |
| H6  | H18 | 0.00015115608699 |
| H7  | H18 | 0.0006597508112  |
| C8  | H18 | 0.00072687837209 |
| H9  | H18 | 0.0029205535351  |
| N1  | H18 | 0.00061633122668 |
| C11 | H18 | 0.002310786288   |
| H12 | H18 | 0.002937153105   |
| H13 | H18 | 0.0079572924151  |
| N14 | H18 | 0.020528099433   |
| H15 | H18 | 0.0080934913525  |
| C16 | H18 | 0.019435444458   |
| N17 | H18 | 0.78373324521    |
| N1  | H19 | 7.9139084265e-06 |
| C2  | H19 | 6.099156199e-06  |
| C3  | H19 | 1.033034289e-06  |
| O4  | H19 | 5.7854073921e-05 |
| C5  | H19 | 6.3593022029e-05 |
| H6  | H19 | 6.3658755765e-05 |
| H7  | H19 | 0.00027041822884 |
| C8  | H19 | 0.00024257071348 |
| H9  | H19 | 0.0012296064613  |
| N1  | H19 | 0.00026530822903 |
| C11 | H19 | 0.0008317353581  |
| H12 | H19 | 0.0013216979969  |
| H13 | H19 | 0.0032624172652  |
| N14 | H19 | 0.013874424218   |
| H15 | H19 | 0.0062608067654  |
| C16 | H19 | 0.01759789841    |
| N17 | H19 | 0.79656531929    |
| H18 | H19 | 0.050151101639   |
| N1  | C2  | 2.228397322e-05  |
| C2  | C2  | 4.1058161508e-05 |
| C3  | C2  | 3.6816984632e-06 |

|     |     |                  |
|-----|-----|------------------|
| O4  | C2  | 0.00011737779175 |
| C5  | C2  | 0.00020854943468 |
| H6  | C2  | 0.00014190170473 |
| H7  | C2  | 0.00048895375329 |
| C8  | C2  | 0.0030195773959  |
| H9  | C2  | 0.0024291926803  |
| N1  | C2  | 0.00089375756947 |
| C11 | C2  | 0.021325785028   |
| H12 | C2  | 0.011437603996   |
| H13 | C2  | 0.018510482802   |
| N14 | C2  | 0.17807131306    |
| H15 | C2  | 0.013962722388   |
| C16 | C2  | 1.0065415546     |
| N17 | C2  | 0.21743527529    |
| H18 | C2  | 0.075681128438   |
| H19 | C2  | 0.036136645656   |
| N1  | H21 | 8.3405803221e-06 |
| C2  | H21 | 1.5497647715e-05 |
| C3  | H21 | 2.1824254327e-06 |
| O4  | H21 | 4.3681011875e-05 |
| C5  | H21 | 6.5263242292e-05 |
| H6  | H21 | 3.8900986568e-05 |
| H7  | H21 | 0.00015448657297 |
| C8  | H21 | 0.0013932871103  |
| H9  | H21 | 0.00064653062744 |
| N1  | H21 | 0.00032245509384 |
| C11 | H21 | 0.0099910319507  |
| H12 | H21 | 0.0036131366141  |
| H13 | H21 | 0.009762415983   |
| N14 | H21 | 0.0076309208584  |
| H15 | H21 | 0.0017735749058  |
| C16 | H21 | 0.015177225346   |
| N17 | H21 | 0.020208767695   |
| H18 | H21 | 0.018876269925   |
| H19 | H21 | 0.0082308800845  |
| C2  | H21 | 0.77457336688    |
| N1  | H22 | 1.777812238e-05  |
| C2  | H22 | 1.1693201883e-05 |
| C3  | H22 | 1.9576243374e-06 |
| O4  | H22 | 0.00014998270774 |
| C5  | H22 | 0.00013174087595 |
| H6  | H22 | 0.00016255619655 |
| H7  | H22 | 0.00071849181843 |
| C8  | H22 | 0.00061018306907 |
| H9  | H22 | 0.0031841471719  |
| N1  | H22 | 0.0006677596423  |
| C11 | H22 | 0.0020603458618  |
| H12 | H22 | 0.0032245698778  |

|     |     |                  |
|-----|-----|------------------|
| H13 | H22 | 0.008788916525   |
| N14 | H22 | 0.021647583053   |
| H15 | H22 | 0.009108305554   |
| C16 | H22 | 0.019033340878   |
| N17 | H22 | 0.078730169121   |
| H18 | H22 | 0.11653114227    |
| H19 | H22 | 0.04509063623    |
| C2  | H22 | 0.78184164915    |
| H21 | H22 | 0.029706205835   |
| N1  | H23 | 0.8634305008     |
| C2  | H23 | 0.020894716743   |
| C3  | H23 | 0.0014305693965  |
| O4  | H23 | 0.00060837471728 |
| C5  | H23 | 0.0058632185485  |
| H6  | H23 | 0.0025088736025  |
| H7  | H23 | 0.0012228064374  |
| C8  | H23 | 0.00062878388605 |
| H9  | H23 | 0.00020127025532 |
| N1  | H23 | 4.1589563303e-05 |
| C11 | H23 | 4.70887438e-05   |
| H12 | H23 | 1.4919563673e-05 |
| H13 | H23 | 6.0484609742e-06 |
| N14 | H23 | 1.6983923705e-05 |
| H15 | H23 | 2.3854103768e-06 |
| C16 | H23 | 2.3592800847e-06 |
| N17 | H23 | 6.8454592498e-06 |
| H18 | H23 | 9.2786533254e-06 |
| H19 | H23 | 3.8965677249e-06 |
| C2  | H23 | 7.1808956068e-06 |
| H21 | H23 | 2.0552195881e-06 |
| H22 | H23 | 1.0179866152e-05 |
| N1  | H24 | 0.060486535554   |
| C2  | H24 | 0.90804612199    |
| C3  | H24 | 0.043424841042   |
| O4  | H24 | 0.01497579108    |
| C5  | H24 | 0.034852926514   |
| H6  | H24 | 0.0091955349215  |
| H7  | H24 | 0.0020205043111  |
| C8  | H24 | 0.0096854186095  |
| H9  | H24 | 0.0076734547874  |
| N1  | H24 | 0.00054920665464 |
| C11 | H24 | 0.0010452163473  |
| H12 | H24 | 0.00034544539654 |
| H13 | H24 | 6.1927265497e-05 |
| N14 | H24 | 0.00010192675192 |
| H15 | H24 | 2.0281153806e-05 |
| C16 | H24 | 1.4415358606e-05 |
| N17 | H24 | 6.5447138357e-05 |

|     |     |                  |
|-----|-----|------------------|
| H18 | H24 | 9.6956659065e-05 |
| H19 | H24 | 4.0120603231e-05 |
| C2  | H24 | 7.3932792349e-05 |
| H21 | H24 | 2.1525932541e-05 |
| H22 | H24 | 0.0001062433975  |
| H23 | H24 | 0.0085530867927  |
| N1  | H25 | 0.85799912285    |
| C2  | H25 | 0.020116130194   |
| C3  | H25 | 0.0065324182825  |
| O4  | H25 | 0.0021401345353  |
| C5  | H25 | 0.0021887469343  |
| H6  | H25 | 0.00022389119994 |
| H7  | H25 | 0.0020070819497  |
| C8  | H25 | 0.0002309903444  |
| H9  | H25 | 3.7672932584e-05 |
| N1  | H25 | 5.185984786e-05  |
| C11 | H25 | 3.5563273285e-05 |
| H12 | H25 | 3.9063453692e-06 |
| H13 | H25 | 8.4541397553e-06 |
| N14 | H25 | 1.7936156632e-05 |
| H15 | H25 | 4.6649130936e-06 |
| C16 | H25 | 4.1148632251e-06 |
| N17 | H25 | 3.0667816576e-05 |
| H18 | H25 | 4.6667496729e-05 |
| H19 | H25 | 1.915226752e-05  |
| C2  | H25 | 3.2075436581e-05 |
| H21 | H25 | 9.0991710971e-06 |
| H22 | H25 | 5.1070374323e-05 |
| H23 | H25 | 0.016750957801   |
| H24 | H25 | 0.0035584998183  |
| N1  | O26 | 0.081264792353   |
| C2  | O26 | 0.083842259902   |
| C3  | O26 | 0.74060075731    |
| O4  | O26 | 0.2779012952     |
| C5  | O26 | 0.0085498617534  |
| H6  | O26 | 0.00086376470006 |
| H7  | O26 | 0.0021237550548  |
| C8  | O26 | 0.00060620227624 |
| H9  | O26 | 0.00012894114501 |
| N1  | O26 | 0.00082327797952 |
| C11 | O26 | 0.00016514023387 |
| H12 | O26 | 2.158172725e-05  |
| H13 | O26 | 6.1390254548e-05 |
| N14 | O26 | 3.6684341407e-05 |
| H15 | O26 | 9.8835842174e-06 |
| C16 | O26 | 3.6157304304e-06 |
| N17 | O26 | 6.1092443257e-06 |
| H18 | O26 | 4.3915694165e-06 |

|     |     |                  |
|-----|-----|------------------|
| H19 | O26 | 5.5372423826e-06 |
| C2  | O26 | 6.459676045e-06  |
| H21 | O26 | 3.426313057e-06  |
| H22 | O26 | 4.4812932757e-06 |
| H23 | O26 | 0.0017281804087  |
| H24 | O26 | 0.0088575753186  |
| H25 | O26 | 0.0027312870883  |
| N1  | H27 | 0.044007083574   |
| C2  | H27 | 0.0022259547939  |
| C3  | H27 | 0.0063021275641  |
| O4  | H27 | 0.0077507546918  |
| C5  | H27 | 0.00064483051168 |
| H6  | H27 | 2.8221199117e-05 |
| H7  | H27 | 9.386464043e-05  |
| C8  | H27 | 0.00010659721943 |
| H9  | H27 | 6.3606834217e-06 |
| N1  | H27 | 4.8773950285e-05 |
| C11 | H27 | 1.4784241058e-05 |
| H12 | H27 | 1.2813849412e-06 |
| H13 | H27 | 2.9174180833e-06 |
| N14 | H27 | 6.7755413983e-06 |
| H15 | H27 | 4.5464919073e-07 |
| C16 | H27 | 7.7614930114e-07 |
| N17 | H27 | 5.968348857e-07  |
| H18 | H27 | 5.0912166922e-07 |
| H19 | H27 | 2.1028451876e-07 |
| C2  | H27 | 4.2595361644e-07 |
| H21 | H27 | 1.5009387091e-07 |
| H22 | H27 | 4.6451917456e-07 |
| H23 | H27 | 0.00068053506868 |
| H24 | H27 | 0.00011538750143 |
| H25 | H27 | 0.00086070410519 |
| O26 | H27 | 0.48072340197    |



## GLUTAMIC ACID

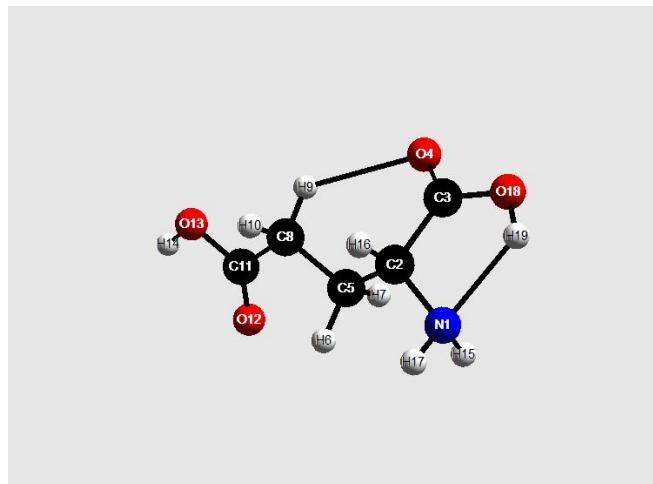

## HARTREE-FOCK

| Atom A | Atom B | Delocalization index |
|--------|--------|----------------------|
| N1     | C2     | 0.94398859068        |
| N1     | C3     | 0.055751962495       |
| C2     | C3     | 0.85452500592        |
| N1     | O4     | 0.01412773254        |
| C2     | O4     | 0.10149385879        |
| C3     | O4     | 1.1051409564         |
| N1     | C5     | 0.073297643336       |
| C2     | C5     | 0.93939003382        |
| C3     | C5     | 0.03364747075        |
| O4     | C5     | 0.02294887996        |
| N1     | H6     | 0.020674568291       |
| C2     | H6     | 0.040033467732       |
| C3     | H6     | 0.0071632316695      |
| O4     | H6     | 0.0022370175016      |
| C5     | H6     | 0.9363919723         |
| N1     | H7     | 0.0066146526542      |
| C2     | H7     | 0.040050514153       |
| C3     | H7     | 0.005216286739       |
| O4     | H7     | 0.0092514311823      |
| C5     | H7     | 0.93906648305        |
| H6     | H7     | 0.038996890091       |
| N1     | C8     | 0.012038233657       |
| C2     | C8     | 0.039114393495       |
| C3     | C8     | 0.001947819618       |
| O4     | C8     | 0.023774146785       |
| C5     | C8     | 0.96842020625        |
| H6     | C8     | 0.040022078519       |
| H7     | C8     | 0.039266791767       |
| N1     | H9     | 0.00051673856001     |
| C2     | H9     | 0.0021185808816      |

|     |     |                  |
|-----|-----|------------------|
| C3  | H9  | 0.00092234117029 |
| O4  | H9  | 0.03608800699    |
| C5  | H9  | 0.032221039366   |
| H6  | H9  | 0.0092928545925  |
| H7  | H9  | 0.0029827065185  |
| C8  | H9  | 0.9175089599     |
| N1  | N1  | 0.00075980636892 |
| C2  | N1  | 0.0069719060151  |
| C3  | N1  | 0.00040774888212 |
| O4  | N1  | 0.001355468104   |
| C5  | N1  | 0.037308780215   |
| H6  | N1  | 0.0029006455481  |
| H7  | N1  | 0.010001367638   |
| C8  | N1  | 0.93928433632    |
| H9  | N1  | 0.035700652022   |
| N1  | C11 | 0.0016353718806  |
| C2  | C11 | 0.0071342239328  |
| C3  | C11 | 0.00021177813884 |
| O4  | C11 | 0.0019783838725  |
| C5  | C11 | 0.034921036682   |
| H6  | C11 | 0.0040710351903  |
| H7  | C11 | 0.0029527559198  |
| C8  | C11 | 0.90010335503    |
| H9  | C11 | 0.041534316613   |
| N1  | C11 | 0.046811684268   |
| N1  | O12 | 0.00026155134953 |
| C2  | O12 | 0.0032788192142  |
| C3  | O12 | 0.00033446692731 |
| O4  | O12 | 0.00085998061698 |
| C5  | O12 | 0.031646417125   |
| H6  | O12 | 0.018139181788   |
| H7  | O12 | 0.012135741451   |
| C8  | O12 | 0.096930175703   |
| H9  | O12 | 0.012805039356   |
| N1  | O12 | 0.014474492065   |
| C11 | O12 | 1.1015204239     |
| N1  | O13 | 0.00056186030992 |
| C2  | O13 | 0.001385857583   |
| C3  | O13 | 3.8230958466e-05 |
| O4  | O13 | 0.00033448339329 |
| C5  | O13 | 0.0095078089462  |
| H6  | O13 | 0.00091323190516 |
| H7  | O13 | 0.00079398326927 |
| C8  | O13 | 0.090241794624   |
| H9  | O13 | 0.013558953477   |
| N1  | O13 | 0.014939478904   |
| C11 | O13 | 0.71646819122    |
| O12 | O13 | 0.29380442288    |

|     |     |                  |
|-----|-----|------------------|
| N1  | H14 | 9.6488721671e-05 |
| C2  | H14 | 0.00020984162926 |
| C3  | H14 | 4.7394127518e-06 |
| O4  | H14 | 1.528072934e-05  |
| C5  | H14 | 0.0010894114008  |
| H6  | H14 | 2.5232833723e-05 |
| H7  | H14 | 2.4662053552e-05 |
| C8  | H14 | 0.0062994861246  |
| H9  | H14 | 0.00024171481067 |
| N1  | H14 | 0.00027365814403 |
| C11 | H14 | 0.0082539120029  |
| O12 | H14 | 0.010636202223   |
| O13 | H14 | 0.54519276117    |
| N1  | H15 | 0.86305093866    |
| C2  | H15 | 0.02071735605    |
| C3  | H15 | 0.0013705616993  |
| O4  | H15 | 0.00060284580897 |
| C5  | H15 | 0.0065494742982  |
| H6  | H15 | 0.0012407159031  |
| H7  | H15 | 0.0029837956953  |
| C8  | H15 | 0.00067822814955 |
| H9  | H15 | 3.3792177988e-05 |
| N1  | H15 | 0.00021298382767 |
| C11 | H15 | 3.8471279215e-05 |
| O12 | H15 | 4.4775740684e-05 |
| O13 | H15 | 1.7088136069e-05 |
| H14 | H15 | 1.9660060853e-06 |
| N1  | H16 | 0.060773135548   |
| C2  | H16 | 0.90919433353    |
| C3  | H16 | 0.044303636543   |
| O4  | H16 | 0.015467362092   |
| C5  | H16 | 0.034662938814   |
| H6  | H16 | 0.0022096671311  |
| H7  | H16 | 0.0093512680973  |
| C8  | H16 | 0.0091505005041  |
| H9  | H16 | 0.00035754020077 |
| N1  | H16 | 0.0073946704826  |
| C11 | H16 | 0.00073999810654 |
| O12 | H16 | 0.00058191836748 |
| O13 | H16 | 0.00013841131105 |
| H14 | H16 | 1.1121933581e-05 |
| H15 | H16 | 0.0084287462747  |
| N1  | H17 | 0.86049974926    |
| C2  | H17 | 0.02009710129    |
| C3  | H17 | 0.0064124144824  |
| O4  | H17 | 0.0021041775875  |
| C5  | H17 | 0.0022285810391  |
| H6  | H17 | 0.0019679579728  |

|     |     |                  |
|-----|-----|------------------|
| H7  | H17 | 0.00024331861451 |
| C8  | H17 | 0.00024957664785 |
| H9  | H17 | 5.1169868304e-05 |
| N1  | H17 | 3.5416750115e-05 |
| C11 | H17 | 3.2905403182e-05 |
| O12 | H17 | 1.7092405417e-05 |
| O13 | H17 | 1.3786742578e-05 |
| H14 | H17 | 1.7431887135e-06 |
| H15 | H17 | 0.016781723741   |
| H16 | H17 | 0.0037283858245  |
| N1  | O18 | 0.083727200306   |
| C2  | O18 | 0.083181006732   |
| C3  | O18 | 0.73963370517    |
| O4  | O18 | 0.27839152122    |
| C5  | O18 | 0.0083656396354  |
| H6  | O18 | 0.002085839447   |
| H7  | O18 | 0.0007822250715  |
| C8  | O18 | 0.00063750517486 |
| H9  | O18 | 0.00077088553421 |
| N1  | O18 | 0.0001271441208  |
| C11 | O18 | 0.00013283771581 |
| O12 | O18 | 0.00014235988192 |
| O13 | O18 | 3.7174830791e-05 |
| H14 | O18 | 3.3619506394e-06 |
| H15 | O18 | 0.0017679692191  |
| H16 | O18 | 0.0085580153967  |
| H17 | O18 | 0.0028440518721  |
| N1  | H19 | 0.047026985912   |
| C2  | H19 | 0.0022575993133  |
| C3  | H19 | 0.0062706439982  |
| O4  | H19 | 0.0076340121943  |
| C5  | H19 | 0.00065449593698 |
| H6  | H19 | 9.2673254439e-05 |
| H7  | H19 | 2.4004178024e-05 |
| C8  | H19 | 0.00011511895717 |
| H9  | H19 | 4.9750990292e-05 |
| N1  | H19 | 5.4714156556e-06 |
| C11 | H19 | 1.3208663771e-05 |
| O12 | H19 | 6.651920248e-06  |
| O13 | H19 | 6.2880153791e-06 |
| H14 | H19 | 8.858479612e-07  |
| H15 | H19 | 0.00072092292382 |
| H16 | H19 | 0.00010907823958 |
| H17 | H19 | 0.00094383713538 |
| O18 | H19 | 0.47811276356    |

## ASPARAGINE

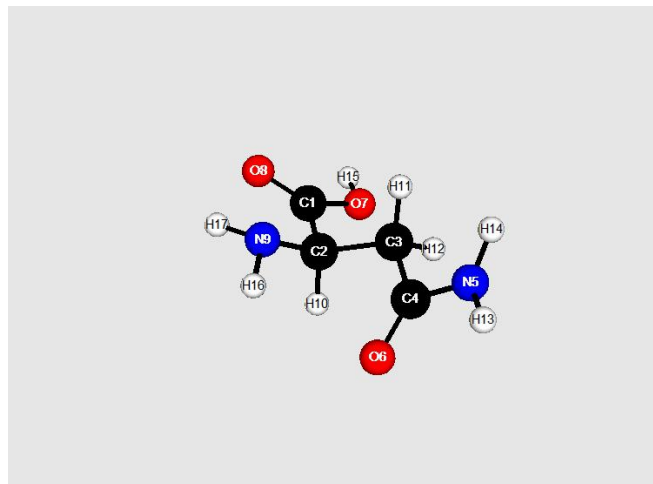

## HARTREE-FOCK

| Atom A | Atom B | Delocalization index |
|--------|--------|----------------------|
| C1     | C2     | 0.86645811184        |
| C1     | C3     | 0.041306176372       |
| C2     | C3     | 0.93245690465        |
| C1     | C4     | 0.0064621095204      |
| C2     | C4     | 0.031482529221       |
| C3     | C4     | 0.89261869458        |
| C1     | N5     | 0.0013776308527      |
| C2     | N5     | 0.008577352367       |
| C3     | N5     | 0.08629496378        |
| C4     | N5     | 0.88897856884        |
| C1     | O6     | 0.0023578170758      |
| C2     | O6     | 0.027859731248       |
| C3     | O6     | 0.10378088377        |
| C4     | O6     | 1.0985420268         |
| N5     | O6     | 0.26699533181        |
| C1     | O7     | 0.71474662463        |
| C2     | O7     | 0.077816542298       |
| C3     | O7     | 0.028034933927       |
| C4     | O7     | 0.0025448385901      |
| N5     | O7     | 0.00053349446799     |
| O6     | O7     | 0.0010720868353      |
| C1     | O8     | 1.1045959973         |
| C2     | O8     | 0.089983559037       |
| C3     | O8     | 0.011725326289       |
| C4     | O8     | 0.0019296507923      |
| N5     | O8     | 0.00056608851636     |
| O6     | O8     | 0.0011014829477      |
| O7     | O8     | 0.29366189027        |
| C1     | N9     | 0.054683361578       |
| C2     | N9     | 0.98215855774        |

|     |     |                  |
|-----|-----|------------------|
| C3  | N9  | 0.073256136217   |
| C4  | N9  | 0.010344359036   |
| N5  | N9  | 0.0023373324905  |
| O6  | N9  | 0.027331846835   |
| O7  | N9  | 0.010851635198   |
| O8  | N9  | 0.054201808586   |
| C1  | C1  | 0.046705537596   |
| C2  | C1  | 0.8978130422     |
| C3  | C1  | 0.036858882744   |
| C4  | C1  | 0.0032684621572  |
| N5  | C1  | 0.00097470793522 |
| O6  | C1  | 0.021475568389   |
| O7  | C1  | 0.012073005481   |
| O8  | C1  | 0.013788873402   |
| N9  | C1  | 0.064054180493   |
| C1  | H11 | 0.0042887557034  |
| C2  | H11 | 0.036610963216   |
| C3  | H11 | 0.94209985239    |
| C4  | H11 | 0.037599825428   |
| N5  | H11 | 0.016932828951   |
| O6  | H11 | 0.012994266928   |
| O7  | H11 | 0.0029156224526  |
| O8  | H11 | 0.0014555978172  |
| N9  | H11 | 0.015577720637   |
| C1  | H11 | 0.0094108072798  |
| C1  | H12 | 0.0024538739867  |
| C2  | H12 | 0.03319833884    |
| C3  | H12 | 0.93381043039    |
| C4  | H12 | 0.042758521495   |
| N5  | H12 | 0.012035264178   |
| O6  | H12 | 0.013787148323   |
| O7  | H12 | 0.024487333255   |
| O8  | H12 | 0.00079430553216 |
| N9  | H12 | 0.011154107745   |
| C1  | H12 | 0.0027638300009  |
| H11 | H12 | 0.036610489002   |
| C1  | H13 | 0.00026693766754 |
| C2  | H13 | 0.0013126781868  |
| C3  | H13 | 0.0076306968658  |
| C4  | H13 | 0.014837215843   |
| N5  | H13 | 0.798440024      |
| O6  | H13 | 0.011628739474   |
| O7  | H13 | 6.0482799296e-05 |
| O8  | H13 | 0.00012100787374 |
| N9  | H13 | 7.916441368e-05  |
| C1  | H13 | 4.3879470451e-05 |
| H11 | H13 | 0.00058270911734 |
| H12 | H13 | 0.00032042931352 |

|     |     |                  |
|-----|-----|------------------|
| C1  | H14 | 4.3244572176e-05 |
| C2  | H14 | 0.00061499894912 |
| C3  | H14 | 0.0052619991347  |
| C4  | H14 | 0.014081024465   |
| N5  | H14 | 0.81528065262    |
| O6  | H14 | 0.01448745086    |
| O7  | H14 | 1.9138877029e-05 |
| O8  | H14 | 2.588560716e-05  |
| N9  | H14 | 0.00010829108975 |
| C1  | H14 | 0.00019729412713 |
| H11 | H14 | 0.0047431328108  |
| H12 | H14 | 0.000305072251   |
| H13 | H14 | 0.014659563123   |
| C1  | H15 | 0.0081695337311  |
| C2  | H15 | 0.0059118984442  |
| C3  | H15 | 0.0006020041538  |
| C4  | H15 | 3.4587365076e-05 |
| N5  | H15 | 1.3227927037e-05 |
| O6  | H15 | 4.7735273864e-05 |
| O7  | H15 | 0.54014527181    |
| O8  | H15 | 0.010555699906   |
| N9  | H15 | 0.001040810412   |
| C1  | H15 | 0.00019734611818 |
| H11 | H15 | 4.1802237167e-05 |
| H12 | H15 | 0.00051013007422 |
| H13 | H15 | 9.3896229523e-07 |
| H14 | H15 | 3.9435759598e-07 |
| C1  | H16 | 0.0060303868909  |
| C2  | H16 | 0.019897913805   |
| C3  | H16 | 0.0013671846817  |
| C4  | H16 | 0.0012468374898  |
| N5  | H16 | 0.00053047869531 |
| O6  | H16 | 0.016858133803   |
| O7  | H16 | 0.0012431457525  |
| O8  | H16 | 0.0024430712526  |
| N9  | H16 | 0.84153691504    |
| C1  | H16 | 0.0033167619323  |
| H11 | H16 | 0.00027263237062 |
| H12 | H16 | 0.00020359173418 |
| H13 | H16 | 1.0143309653e-05 |
| H14 | H16 | 4.6312855106e-05 |
| H15 | H16 | 0.0001794253456  |
| C1  | H17 | 0.003644637814   |
| C2  | H17 | 0.019398218066   |
| C3  | H17 | 0.0069449869126  |
| C4  | H17 | 0.00058912552051 |
| N5  | H17 | 0.00015171780344 |
| O6  | H17 | 0.0013641466669  |

|     |     |                  |
|-----|-----|------------------|
| O7  | H17 | 0.00090732027586 |
| O8  | H17 | 0.026524766274   |
| N9  | H17 | 0.827181472      |
| C1  | H17 | 0.0010962986926  |
| H11 | H17 | 0.00031065335311 |
| H12 | H17 | 0.0014165876702  |
| H13 | H17 | 7.7165059416e-06 |
| H14 | H17 | 8.8406771524e-06 |
| H15 | H17 | 3.8492831903e-05 |
| H16 | H17 | 0.014152453065   |



# LEUCINE

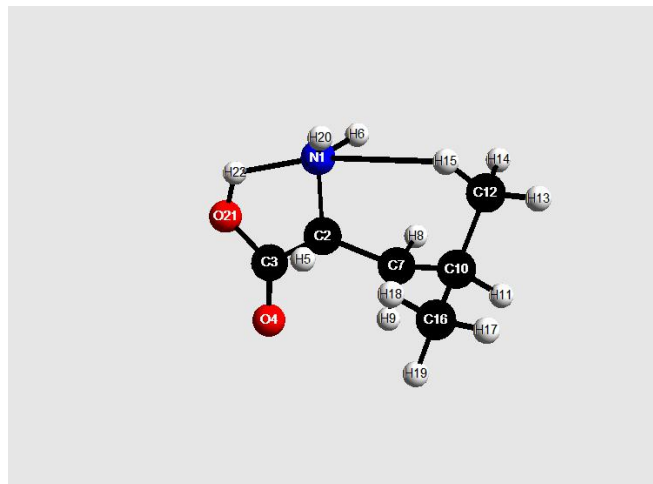

## HARTREE-FOCK

| Atom A | Atom B | Delocalization index |
|--------|--------|----------------------|
| N1     | C2     | 0.93521753113        |
| N1     | C3     | 0.055931462508       |
| C2     | C3     | 0.85074720611        |
| N1     | O4     | 0.013701759666       |
| C2     | O4     | 0.10164441403        |
| C3     | O4     | 1.1010525884         |
| N1     | H5     | 0.060268345952       |
| C2     | H5     | 0.90494151932        |
| C3     | H5     | 0.043280169197       |
| O4     | H5     | 0.017337634915       |
| N1     | H6     | 0.85589092165        |
| C2     | H6     | 0.020141562885       |
| C3     | H6     | 0.0014564842468      |
| O4     | H6     | 0.00081088691253     |
| H5     | H6     | 0.0065360523144      |
| N1     | C7     | 0.064500445233       |
| C2     | C7     | 0.93894826192        |
| C3     | C7     | 0.036622007479       |
| O4     | C7     | 0.03163640449        |
| H5     | C7     | 0.03293329699        |
| H6     | C7     | 0.0079545631383      |
| N1     | H8     | 0.012935621781       |
| C2     | H8     | 0.04432404108        |
| C3     | H8     | 0.003368115679       |
| O4     | H8     | 0.0031237907094      |
| H5     | H8     | 0.0093825945668      |
| H6     | H8     | 0.0063670460212      |
| C7     | H8     | 0.94257799444        |
| N1     | H9     | 0.011523347415       |
| C2     | H9     | 0.037560870409       |

|     |     |                  |
|-----|-----|------------------|
| C3  | H9  | 0.0049959816236  |
| O4  | H9  | 0.037163263859   |
| H5  | H9  | 0.0015306903694  |
| H6  | H9  | 0.00058277690654 |
| C7  | H9  | 0.92668145554    |
| H8  | H9  | 0.038478989298   |
| N1  | N1  | 0.0043183626459  |
| C2  | N1  | 0.036468258745   |
| C3  | N1  | 0.0071033248667  |
| O4  | N1  | 0.0028628411008  |
| H5  | N1  | 0.00501977066    |
| H6  | N1  | 0.00048950743482 |
| C7  | N1  | 0.95481570968    |
| H8  | N1  | 0.039930221908   |
| H9  | N1  | 0.036058951933   |
| N1  | H11 | 0.00068912312409 |
| C2  | H11 | 0.0093674635141  |
| C3  | H11 | 0.0011715647258  |
| O4  | H11 | 0.00027069464775 |
| H5  | H11 | 0.00050291007231 |
| H6  | H11 | 8.3467832679e-05 |
| C7  | H11 | 0.045987706561   |
| H8  | H11 | 0.0044498411655  |
| H9  | H11 | 0.005481927682   |
| N1  | H11 | 0.9334979696     |
| N1  | C12 | 0.015263553402   |
| C2  | C12 | 0.0033723903643  |
| C3  | C12 | 0.00026001191265 |
| O4  | C12 | 0.00061868397151 |
| H5  | C12 | 0.00038912130068 |
| H6  | C12 | 0.0033180104056  |
| C7  | C12 | 0.041320809269   |
| H8  | C12 | 0.007247342914   |
| H9  | C12 | 0.0083738425808  |
| N1  | C12 | 0.965581894      |
| H11 | C12 | 0.044612241223   |
| N1  | H13 | 0.0021437512483  |
| C2  | H13 | 0.00039680905835 |
| C3  | H13 | 0.00013554309125 |
| O4  | H13 | 0.0001608891371  |
| H5  | H13 | 5.2721731211e-05 |
| H6  | H13 | 0.00050488050518 |
| C7  | H13 | 0.009839456106   |
| H8  | H13 | 0.00062462839859 |
| H9  | H13 | 0.0015766715725  |
| N1  | H13 | 0.040129113811   |
| H11 | H13 | 0.0051816768221  |
| C12 | H13 | 0.96004263924    |

|     |     |                  |
|-----|-----|------------------|
| N1  | H14 | 0.0039841115228  |
| C2  | H14 | 0.00048186323853 |
| C3  | H14 | 5.934980259e-05  |
| O4  | H14 | 5.1401968494e-05 |
| H5  | H14 | 0.00017406536382 |
| H6  | H14 | 0.003074176009   |
| C7  | H14 | 0.0076262121705  |
| H8  | H14 | 0.0068851334676  |
| H9  | H14 | 0.00060053317436 |
| N1  | H14 | 0.039707864142   |
| H11 | H14 | 0.003206600213   |
| C12 | H14 | 0.96042098124    |
| H13 | H14 | 0.043239145289   |
| N1  | H15 | 0.020544985186   |
| C2  | H15 | 0.001418563847   |
| C3  | H15 | 0.00018526963211 |
| O4  | H15 | 8.9505375712e-05 |
| H5  | H15 | 0.0003732030485  |
| H6  | H15 | 0.0011307212821  |
| C7  | H15 | 0.0026439450779  |
| H8  | H15 | 0.00036077685675 |
| H9  | H15 | 0.00037076823158 |
| N1  | H15 | 0.040020459942   |
| H11 | H15 | 0.011255588042   |
| C12 | H15 | 0.95381580474    |
| H13 | H15 | 0.043655758601   |
| H14 | H15 | 0.04447992057    |
| N1  | C16 | 0.00086974743577 |
| C2  | C16 | 0.0082753986452  |
| C3  | C16 | 0.00067916394899 |
| O4  | C16 | 0.00040617257326 |
| H5  | C16 | 0.011688617545   |
| H6  | C16 | 0.00026079560868 |
| C7  | C16 | 0.042683563918   |
| H8  | C16 | 0.0094208163288  |
| H9  | C16 | 0.0069920820372  |
| N1  | C16 | 0.96531197362    |
| H11 | C16 | 0.043742318387   |
| C12 | C16 | 0.047242385349   |
| H13 | C16 | 0.0073173426741  |
| H14 | C16 | 0.010267206958   |
| H15 | C16 | 0.0082242461025  |
| N1  | H17 | 0.00013447015194 |
| C2  | H17 | 0.001126368376   |
| C3  | H17 | 0.00011728046402 |
| O4  | H17 | 0.0001103556357  |
| H5  | H17 | 0.0017162400825  |
| H6  | H17 | 3.2807205788e-05 |

|     |     |                  |
|-----|-----|------------------|
| C7  | H17 | 0.0097986894963  |
| H8  | H17 | 0.0019380855793  |
| H9  | H17 | 0.00059611779949 |
| N1  | H17 | 0.04039527667    |
| H11 | H17 | 0.0046683330848  |
| C12 | H17 | 0.0076685633222  |
| H13 | H17 | 0.00650138527    |
| H14 | H17 | 0.00079606105962 |
| H15 | H17 | 0.00056852767605 |
| C16 | H17 | 0.9608408562     |
| N1  | H18 | 0.00088814051203 |
| C2  | H18 | 0.007436951936   |
| C3  | H18 | 0.00069887707601 |
| O4  | H18 | 0.00028307182733 |
| H5  | H18 | 0.014881762173   |
| H6  | H18 | 8.6953417414e-05 |
| C7  | H18 | 0.0031838751478  |
| H8  | H18 | 0.00045581179381 |
| H9  | H18 | 0.00037598826968 |
| N1  | H18 | 0.040297599402   |
| H11 | H18 | 0.011224422396   |
| C12 | H18 | 0.0078159624029  |
| H13 | H18 | 0.00053145395393 |
| H14 | H18 | 0.00078554700352 |
| H15 | H18 | 0.0065704413024  |
| C16 | H18 | 0.95563984312    |
| H17 | H18 | 0.044251157633   |
| N1  | H19 | 0.00021769730909 |
| C2  | H19 | 0.00092790710089 |
| C3  | H19 | 0.00011047514808 |
| O4  | H19 | 0.00060371053099 |
| H5  | H19 | 0.0014649014969  |
| H6  | H19 | 3.4420942125e-05 |
| C7  | H19 | 0.0083555966104  |
| H8  | H19 | 0.00071781502836 |
| H9  | H19 | 0.0066517523077  |
| N1  | H19 | 0.039171832523   |
| H11 | H19 | 0.0032678197336  |
| C12 | H19 | 0.010099139679   |
| H13 | H19 | 0.00073693986545 |
| H14 | H19 | 0.0025055830651  |
| H15 | H19 | 0.00084558853144 |
| C16 | H19 | 0.95993803852    |
| H17 | H19 | 0.042401427496   |
| H18 | H19 | 0.043760831315   |
| N1  | C2  | 0.85551703177    |
| C2  | C2  | 0.019804126501   |
| C3  | C2  | 0.004821436804   |

|     |     |                  |
|-----|-----|------------------|
| O4  | C2  | 0.0016146125679  |
| H5  | C2  | 0.0046327062773  |
| H6  | C2  | 0.016614551317   |
| C7  | C2  | 0.0018078350705  |
| H8  | C2  | 0.00045797020915 |
| H9  | C2  | 0.00049310264171 |
| N1  | C2  | 0.0003414173499  |
| H11 | C2  | 0.00017627337317 |
| C12 | C2  | 0.003616682296   |
| H13 | C2  | 0.0003561231604  |
| H14 | C2  | 0.00023900559307 |
| H15 | C2  | 0.0069070351581  |
| C16 | C2  | 0.00018008470695 |
| H17 | C2  | 3.0709382082e-05 |
| H18 | C2  | 0.00027460613093 |
| H19 | C2  | 2.7059696785e-05 |
| N1  | O21 | 0.090161836424   |
| C2  | O21 | 0.082281896601   |
| C3  | O21 | 0.74250601794    |
| O4  | O21 | 0.27897715733    |
| H5  | O21 | 0.0072496927467  |
| H6  | O21 | 0.0015760834709  |
| C7  | O21 | 0.0075186750393  |
| H8  | O21 | 0.00074644951129 |
| H9  | O21 | 0.0012174955695  |
| N1  | O21 | 0.0017606702135  |
| H11 | O21 | 0.00043323144107 |
| C12 | O21 | 0.00024420780699 |
| H13 | O21 | 5.3521494069e-05 |
| H14 | O21 | 4.4261984241e-05 |
| H15 | O21 | 0.00028156645906 |
| C16 | O21 | 0.00020146535571 |
| H17 | O21 | 3.8884187814e-05 |
| H18 | O21 | 0.00023084018856 |
| H19 | O21 | 6.8208928961e-05 |
| C2  | O21 | 0.0023253370554  |
| N1  | H22 | 0.054526252284   |
| C2  | H22 | 0.0023658494385  |
| C3  | H22 | 0.0063947349707  |
| O4  | H22 | 0.0072889295172  |
| H5  | H22 | 0.00014756741412 |
| H6  | H22 | 0.00078489538584 |
| C7  | H22 | 0.00056507585491 |
| H8  | H22 | 2.2958019019e-05 |
| H9  | H22 | 7.6907818448e-05 |
| N1  | H22 | 5.434436815e-05  |
| H11 | H22 | 1.6646074431e-05 |
| C12 | H22 | 7.4912047065e-05 |

|     |     |                  |
|-----|-----|------------------|
| H13 | H22 | 2.1275009274e-05 |
| H14 | H22 | 1.3888459384e-05 |
| H15 | H22 | 0.00010386429019 |
| C16 | H22 | 7.6720436704e-06 |
| H17 | H22 | 7.9357685934e-07 |
| H18 | H22 | 4.8649922474e-06 |
| H19 | H22 | 2.1194581031e-06 |
| C2  | H22 | 0.00094686463119 |
| O21 | H22 | 0.46902937554    |

## CYSTEINE

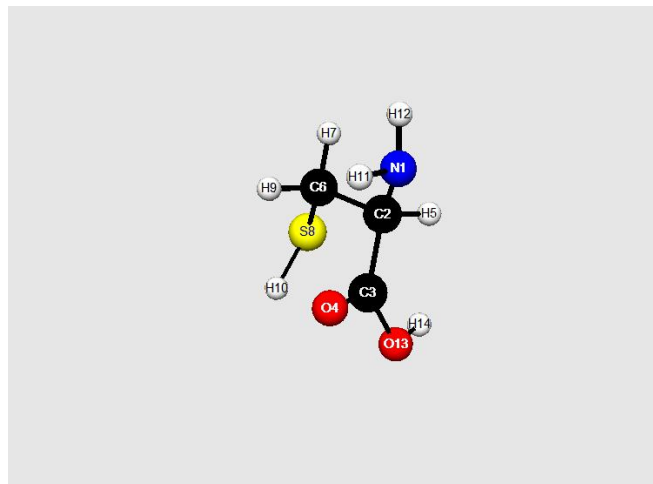

## HARTREE-FOCK

| Atom A | Atom B | Delocalization index |
|--------|--------|----------------------|
| N1     | C2     | 0.97714207038        |
| N1     | C3     | 0.057959235788       |
| C2     | C3     | 0.85069856389        |
| N1     | O4     | 0.052599587318       |
| C2     | O4     | 0.096158426459       |
| C3     | O4     | 1.1118166768         |
| N1     | H5     | 0.060293585691       |
| C2     | H5     | 0.9098680374         |
| C3     | H5     | 0.03366663692        |
| O4     | H5     | 0.011077570912       |
| N1     | C6     | 0.081069577951       |
| C2     | C6     | 0.93381871006        |
| C3     | C6     | 0.04444323133        |
| O4     | C6     | 0.020505517683       |
| H5     | C6     | 0.040466822413       |
| N1     | H7     | 0.013248594609       |
| C2     | H7     | 0.036394279598       |
| C3     | H7     | 0.0082189605012      |
| O4     | H7     | 0.0032424419573      |
| H5     | H7     | 0.0033198049113      |
| C6     | H7     | 0.94761723683        |
| N1     | S8     | 0.023516960052       |
| C2     | S8     | 0.062358801149       |
| C3     | S8     | 0.0080182069115      |
| O4     | S8     | 0.003515438692       |
| H5     | S8     | 0.01878888703        |
| C6     | S8     | 1.0764749862         |
| H7     | S8     | 0.05415931686        |
| N1     | H9     | 0.010870073389       |
| C2     | H9     | 0.034430703235       |

|     |     |                  |
|-----|-----|------------------|
| C3  | H9  | 0.0041318208281  |
| O4  | H9  | 0.010143784194   |
| H5  | H9  | 0.0093566935116  |
| C6  | H9  | 0.94325085739    |
| H7  | H9  | 0.034929952232   |
| S8  | H9  | 0.057622196043   |
| N1  | N1  | 0.00096098749667 |
| C2  | N1  | 0.0026505460346  |
| C3  | N1  | 0.0022373038628  |
| O4  | N1  | 0.0027300703344  |
| H5  | N1  | 0.0006465890791  |
| C6  | N1  | 0.044958706241   |
| H7  | N1  | 0.0096555039695  |
| S8  | N1  | 1.1236189343     |
| H9  | N1  | 0.0044654121147  |
| N1  | H11 | 0.82563058217    |
| C2  | H11 | 0.019957974316   |
| C3  | H11 | 0.0029162764338  |
| O4  | H11 | 0.021619911226   |
| H5  | H11 | 0.0083473625644  |
| C6  | H11 | 0.0025294802831  |
| H7  | H11 | 0.00025946502763 |
| S8  | H11 | 0.00071382675524 |
| H9  | H11 | 0.0013405280269  |
| N1  | H11 | 3.9731039352e-05 |
| N1  | H12 | 0.87201139986    |
| C2  | H12 | 0.021430248199   |
| C3  | H12 | 0.0073702115833  |
| O4  | H12 | 0.0031261095019  |
| H5  | H12 | 0.0011722856186  |
| C6  | H12 | 0.0063808235543  |
| H7  | H12 | 0.0044716412374  |
| S8  | H12 | 0.00075233009992 |
| H9  | H12 | 0.00035745206536 |
| N1  | H12 | 0.00012855603211 |
| H11 | H12 | 0.015761707277   |
| N1  | O13 | 0.010288382029   |
| C2  | O13 | 0.087630290235   |
| C3  | O13 | 0.72632184882    |
| O4  | O13 | 0.27807165131    |
| H5  | O13 | 0.020518242106   |
| C6  | O13 | 0.0086613717877  |
| H7  | O13 | 0.0013800599425  |
| S8  | O13 | 0.035338243343   |
| H9  | O13 | 0.00087074948409 |
| N1  | O13 | 0.010730098774   |
| H11 | O13 | 0.00084486645713 |
| H12 | O13 | 0.0017076581872  |



|     |     |                  |
|-----|-----|------------------|
| N1  | H14 | 0.00060226930156 |
| C2  | H14 | 0.0042820843427  |
| C3  | H14 | 0.0069632858366  |
| O4  | H14 | 0.0097650353486  |
| H5  | H14 | 0.0046815871865  |
| C6  | H14 | 0.00048417991652 |
| H7  | H14 | 3.9900796502e-05 |
| S8  | H14 | 0.0089737860179  |
| H9  | H14 | 0.00023405976423 |
| N1  | H14 | 0.00035814216052 |
| H11 | H14 | 0.00012881574436 |
| H12 | H14 | 3.4727885263e-05 |
| O13 | H14 | 0.54350043213    |

# HISTIDINE

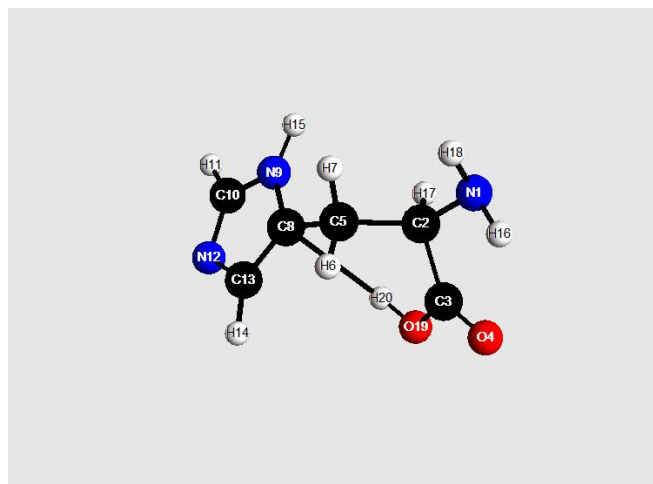

## HARTREE-FOCK

| Atom A | Atom B | Delocalization index |
|--------|--------|----------------------|
| N1     | C2     | 0.98197979328        |
| N1     | C3     | 0.052483351848       |
| C2     | C3     | 0.85739343921        |
| N1     | O4     | 0.061298038599       |
| C2     | O4     | 0.095981958999       |
| C3     | O4     | 1.1123594003         |
| N1     | C5     | 0.073705816932       |
| C2     | C5     | 0.91824123461        |
| C3     | C5     | 0.043240407012       |
| O4     | C5     | 0.014998867139       |
| N1     | H6     | 0.0073513263917      |
| C2     | H6     | 0.036095388409       |
| C3     | H6     | 0.0070163192824      |
| O4     | H6     | 0.0057028850863      |
| C5     | H6     | 0.9415237795         |
| N1     | H7     | 0.019229011679       |
| C2     | H7     | 0.037622945548       |
| C3     | H7     | 0.0077395115177      |
| O4     | H7     | 0.0027225985168      |
| C5     | H7     | 0.93608610515        |
| H6     | H7     | 0.038480784593       |
| N1     | C8     | 0.011542438208       |
| C2     | C8     | 0.041631019795       |
| C3     | C8     | 0.0027451736621      |
| O4     | C8     | 0.0012658247423      |
| C5     | C8     | 0.98643982612        |
| H6     | C8     | 0.043477782034       |
| H7     | C8     | 0.044389519902       |
| N1     | N9     | 0.0016232170251      |
| C2     | N9     | 0.0098762736674      |

|     |     |                  |
|-----|-----|------------------|
| C3  | N9  | 0.00079565579608 |
| O4  | N9  | 0.00054938333357 |
| C5  | N9  | 0.062744913319   |
| H6  | N9  | 0.0090583897236  |
| H7  | N9  | 0.011373144813   |
| C8  | N9  | 0.99217666061    |
| N1  | N1  | 0.0005747461902  |
| C2  | N1  | 0.0029713147212  |
| C3  | N1  | 0.00023248678539 |
| O4  | N1  | 0.0002221289242  |
| C5  | N1  | 0.0085035542805  |
| H6  | N1  | 0.0013142082253  |
| H7  | N1  | 0.002062226313   |
| C8  | N1  | 0.09208815923    |
| N9  | N1  | 0.9705376772     |
| N1  | H11 | 6.7623718963e-05 |
| C2  | H11 | 0.00027232320192 |
| C3  | H11 | 2.0475222928e-05 |
| O4  | H11 | 2.2913062104e-05 |
| C5  | H11 | 0.0013549695743  |
| H6  | H11 | 0.00040551469164 |
| H7  | H11 | 0.00022314383266 |
| C8  | H11 | 0.011617300906   |
| N9  | H11 | 0.064603379296   |
| N1  | H11 | 0.91744852482    |
| N1  | N12 | 0.00073287156958 |
| C2  | N12 | 0.0029794976531  |
| C3  | N12 | 0.00016201116736 |
| O4  | N12 | 0.00015884362747 |
| C5  | N12 | 0.012209879173   |
| H6  | N12 | 0.0010657155122  |
| H7  | N12 | 0.0031466630181  |
| C8  | N12 | 0.13593578876    |
| N9  | N12 | 0.25238767215    |
| N1  | N12 | 1.3275367753     |
| H11 | N12 | 0.068942785655   |
| N1  | C13 | 0.0022451065299  |
| C2  | C13 | 0.011785827244   |
| C3  | C13 | 0.00092997412312 |
| O4  | C13 | 0.00090831420318 |
| C5  | C13 | 0.042885492204   |
| H6  | C13 | 0.0080065273406  |
| H7  | C13 | 0.010733349964   |
| C8  | C13 | 1.4638225739     |
| N9  | C13 | 0.15613890863    |
| N1  | C13 | 0.056259473267   |
| H11 | C13 | 0.011403473558   |
| N12 | C13 | 1.1400648207     |

|     |     |                  |
|-----|-----|------------------|
| N1  | H14 | 0.00010397721092 |
| C2  | H14 | 0.00058410624239 |
| C3  | H14 | 9.5277871067e-05 |
| O4  | H14 | 0.00011622395703 |
| C5  | H14 | 0.0033457183719  |
| H6  | H14 | 0.0025774754609  |
| H7  | H14 | 0.00051990566775 |
| C8  | H14 | 0.051491751916   |
| N9  | H14 | 0.013711505829   |
| N1  | H14 | 0.0076169811239  |
| H11 | H14 | 0.001321229344   |
| N12 | H14 | 0.054973616776   |
| C13 | H14 | 0.95450521235    |
| N1  | H15 | 0.00011671507279 |
| C2  | H15 | 0.00058973569003 |
| C3  | H15 | 5.9404396249e-05 |
| O4  | H15 | 5.6673991184e-05 |
| C5  | H15 | 0.0021378195153  |
| H6  | H15 | 0.00017312025494 |
| H7  | H15 | 0.0012476407587  |
| C8  | H15 | 0.015508163024   |
| N9  | H15 | 0.78536473286    |
| N1  | H15 | 0.013953111026   |
| H11 | H15 | 0.00098872442294 |
| N12 | H15 | 0.012368147136   |
| C13 | H15 | 0.0073153360027  |
| H14 | H15 | 0.0012388408538  |
| N1  | H16 | 0.80148455186    |
| C2  | H16 | 0.019071430361   |
| C3  | H16 | 0.0043187832921  |
| O4  | H16 | 0.034282972358   |
| C5  | H16 | 0.0018289752944  |
| H6  | H16 | 0.00031055468939 |
| H7  | H16 | 0.00047410586691 |
| C8  | H16 | 0.00044218922631 |
| N9  | H16 | 0.00017657707156 |
| N1  | H16 | 2.0118358525e-05 |
| H11 | H16 | 2.093881839e-06  |
| N12 | H16 | 4.5956826212e-05 |
| C13 | H16 | 9.946241482e-05  |
| H14 | H16 | 4.1421634426e-06 |
| H15 | H16 | 1.343991241e-05  |
| N1  | H17 | 0.063869740128   |
| C2  | H17 | 0.90913079013    |
| C3  | H17 | 0.039499709465   |
| O4  | H17 | 0.01221955888    |
| C5  | H17 | 0.039205897994   |
| H6  | H17 | 0.00919065352    |

|     |     |                  |
|-----|-----|------------------|
| H7  | H17 | 0.0020601512983  |
| C8  | H17 | 0.008746824811   |
| N9  | H17 | 0.011727059439   |
| N1  | H17 | 0.00039214082104 |
| H11 | H17 | 3.3835825226e-05 |
| N12 | H17 | 0.0011300344078  |
| C13 | H17 | 0.00084220242601 |
| H14 | H17 | 7.1106448113e-05 |
| H15 | H17 | 0.0010372257856  |
| H16 | H17 | 0.0063332557399  |
| N1  | H18 | 0.87224939829    |
| C2  | H18 | 0.021503999958   |
| C3  | H18 | 0.0059398824452  |
| O4  | H18 | 0.0027309419976  |
| C5  | H18 | 0.0096481963185  |
| H6  | H18 | 0.00050815311583 |
| H7  | H18 | 0.0089214101074  |
| C8  | H18 | 0.0007384535411  |
| N9  | H18 | 0.00011316398317 |
| N1  | H18 | 0.00011049745388 |
| H11 | H18 | 9.2869802796e-06 |
| N12 | H18 | 0.00011535479109 |
| C13 | H18 | 0.00037433364861 |
| H14 | H18 | 1.6839198535e-05 |
| H15 | H18 | 8.3605699162e-06 |
| H16 | H18 | 0.014935117764   |
| H17 | H18 | 0.0013498636772  |
| N1  | O19 | 0.011779980917   |
| C2  | O19 | 0.088663708544   |
| C3  | O19 | 0.72512902727    |
| O4  | O19 | 0.27731836268    |
| C5  | O19 | 0.012404230921   |
| H6  | O19 | 0.0016793268233  |
| H7  | O19 | 0.0015539659122  |
| C8  | O19 | 0.025628412807   |
| N9  | O19 | 0.0025487009476  |
| N1  | O19 | 0.0020610536652  |
| H11 | O19 | 0.00016747318765 |
| N12 | O19 | 0.001794019161   |
| C13 | O19 | 0.019443279049   |
| H14 | O19 | 0.0028381820201  |
| H15 | O19 | 3.9054137984e-05 |
| H16 | O19 | 0.0011604886247  |
| H17 | O19 | 0.017027996996   |
| H18 | O19 | 0.0017701515003  |
| N1  | C2  | 0.00045439582928 |
| C2  | C2  | 0.0027296703901  |
| C3  | C2  | 0.0066517218726  |

|     |    |                  |
|-----|----|------------------|
| O4  | C2 | 0.0092193996375  |
| C5  | C2 | 0.0010650329715  |
| H6  | C2 | 5.5932315007e-05 |
| H7  | C2 | 0.00012175021384 |
| C8  | C2 | 0.014846942957   |
| N9  | C2 | 0.0022858587394  |
| N1  | C2 | 0.0011800427253  |
| H11 | C2 | 9.2100577857e-05 |
| N12 | C2 | 0.0013477507504  |
| C13 | C2 | 0.010873550634   |
| H14 | C2 | 0.00042593117499 |
| H15 | C2 | 1.7921219086e-05 |
| H16 | C2 | 7.5987990015e-05 |
| H17 | C2 | 0.0017207424454  |
| H18 | C2 | 3.5039730427e-05 |
| O19 | C2 | 0.52467838393    |

## PHENYLALANINE

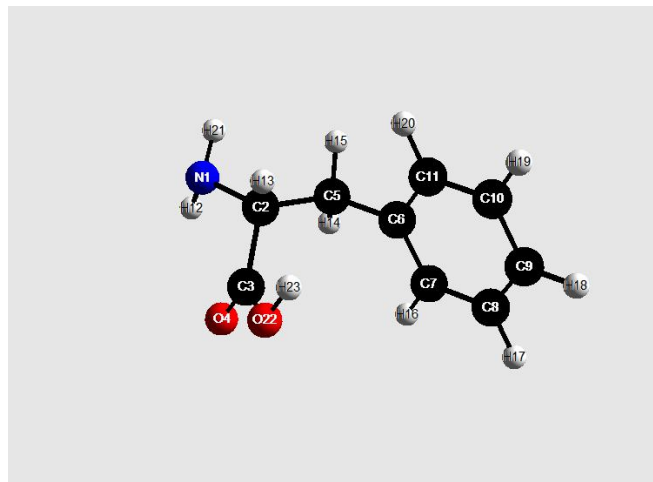

### HARTREE-FOCK

| Atom A | Atom B | Delocalization index |
|--------|--------|----------------------|
| N1     | C2     | 0.97670995531        |
| N1     | C3     | 0.057605224106       |
| C2     | C3     | 0.85350607666        |
| N1     | O4     | 0.05367328213        |
| C2     | O4     | 0.094997975739       |
| C3     | O4     | 1.1088387133         |
| N1     | C5     | 0.075998810224       |
| C2     | C5     | 0.92117569866        |
| C3     | C5     | 0.042971405018       |
| O4     | C5     | 0.018863623403       |
| N1     | C6     | 0.013264108638       |
| C2     | C6     | 0.042417366152       |
| C3     | C6     | 0.0053754012619      |
| O4     | C6     | 0.0016929970666      |
| C5     | C6     | 0.99020771164        |
| N1     | C7     | 0.0019532839021      |
| C2     | C7     | 0.0088196514406      |
| C3     | C7     | 0.0024280185172      |
| O4     | C7     | 0.0023955076319      |
| C5     | C7     | 0.048656519012       |
| C6     | C7     | 1.365019029          |
| N1     | C8     | 0.00039709603629     |
| C2     | C8     | 0.0012150064612      |
| C3     | C8     | 0.00024154600656     |
| O4     | C8     | 0.00030458546156     |
| C5     | C8     | 0.0077005337699      |
| C6     | C8     | 0.072197450886       |
| C7     | C8     | 1.3812775805         |
| N1     | C9     | 0.00075979674386     |
| C2     | C9     | 0.0036320530132      |

|     |     |                  |
|-----|-----|------------------|
| C3  | C9  | 0.00029945479366 |
| O4  | C9  | 0.00014935448172 |
| C5  | C9  | 0.0047896618042  |
| C6  | C9  | 0.093455643819   |
| C7  | C9  | 0.073343517445   |
| C8  | C9  | 1.391342869      |
| N1  | N1  | 0.00030038024487 |
| C2  | N1  | 0.0011360948506  |
| C3  | N1  | 0.00027003592414 |
| O4  | N1  | 0.00021617953712 |
| C5  | N1  | 0.0079158640238  |
| C6  | N1  | 0.07117347854    |
| C7  | N1  | 0.097016508793   |
| C8  | N1  | 0.075490748545   |
| C9  | N1  | 1.3825661978     |
| N1  | C11 | 0.0020677418645  |
| C2  | C11 | 0.011406596947   |
| C3  | C11 | 0.00076847775323 |
| O4  | C11 | 0.00051674824866 |
| C5  | C11 | 0.048650881317   |
| C6  | C11 | 1.3560548369     |
| C7  | C11 | 0.072867895153   |
| C8  | C11 | 0.098212685982   |
| C9  | C11 | 0.073475666593   |
| N1  | C11 | 1.3934467518     |
| N1  | H12 | 0.82553726467    |
| C2  | H12 | 0.019855803212   |
| C3  | H12 | 0.0031842659616  |
| O4  | H12 | 0.023820036179   |
| C5  | H12 | 0.0022297861515  |
| C6  | H12 | 0.00032357359324 |
| C7  | H12 | 5.5535177603e-05 |
| C8  | H12 | 2.1523015447e-05 |
| C9  | H12 | 2.3688362031e-05 |
| N1  | H12 | 2.2749985947e-05 |
| C11 | H12 | 0.00015733139505 |
| N1  | H13 | 0.061801342494   |
| C2  | H13 | 0.91013416664    |
| C3  | H13 | 0.035249064257   |
| O4  | H13 | 0.01117857322    |
| C5  | H13 | 0.038575696877   |
| C6  | H13 | 0.0080129737041  |
| C7  | H13 | 0.00063212793529 |
| C8  | H13 | 0.00071979841623 |
| C9  | H13 | 0.00052328508822 |
| N1  | H13 | 0.0010416296999  |
| C11 | H13 | 0.0090429075517  |
| H12 | H13 | 0.0082487741432  |



|     |     |                  |
|-----|-----|------------------|
| N1  | H14 | 0.011232781197   |
| C2  | H14 | 0.037249605545   |
| C3  | H14 | 0.0048202417602  |
| O4  | H14 | 0.010262036025   |
| C5  | H14 | 0.93870091495    |
| C6  | H14 | 0.039407286749   |
| C7  | H14 | 0.011883374586   |
| C8  | H14 | 0.00095615846451 |
| C9  | H14 | 0.00079808508007 |
| N1  | H14 | 0.0014074114788  |
| C11 | H14 | 0.0073755150229  |
| H12 | H14 | 0.0012656086717  |
| H13 | H14 | 0.0095497519734  |
| N1  | H15 | 0.015276986793   |
| C2  | H15 | 0.039652797402   |
| C3  | H15 | 0.0083892018659  |
| O4  | H15 | 0.0032059945314  |
| C5  | H15 | 0.93972135364    |
| C6  | H15 | 0.042276293116   |
| C7  | H15 | 0.0085550295234  |
| C8  | H15 | 0.0014481047678  |
| C9  | H15 | 0.0021114324853  |
| N1  | H15 | 0.0010522840732  |
| C11 | H15 | 0.011744099568   |
| H12 | H15 | 0.00031298954188 |
| H13 | H15 | 0.0032362892185  |
| H14 | H15 | 0.038764763438   |
| N1  | H16 | 0.00016173418327 |
| C2  | H16 | 0.00060418982585 |
| C3  | H16 | 0.00080144916306 |
| O4  | H16 | 0.0032970676762  |
| C5  | H16 | 0.0097499775807  |
| C6  | H16 | 0.046562536297   |
| C7  | H16 | 0.96614457183    |
| C8  | H16 | 0.047626627745   |
| C9  | H16 | 0.0082037399047  |
| N1  | H16 | 0.005718764726   |
| C11 | H16 | 0.0083136161936  |
| H12 | H16 | 7.2843170883e-06 |
| H13 | H16 | 0.00012767463334 |
| H14 | H16 | 0.0082340174323  |
| H15 | H16 | 0.00078328264133 |
| N1  | H17 | 6.3171439856e-05 |
| C2  | H17 | 9.36158553e-05   |
| C3  | H17 | 9.0398393646e-06 |
| O4  | H17 | 1.5460126209e-05 |
| C5  | H17 | 0.0011227560491  |
| C6  | H17 | 0.0083989486139  |

|     |     |                  |
|-----|-----|------------------|
| C7  | H17 | 0.048539457405   |
| C8  | H17 | 0.97470214823    |
| C9  | H17 | 0.048671890938   |
| N1  | H17 | 0.0085953886059  |
| C11 | H17 | 0.0060063387334  |
| H12 | H17 | 2.1959552435e-06 |
| H13 | H17 | 4.3196001837e-05 |
| H14 | H17 | 6.1584667345e-05 |
| H15 | H17 | 0.00021057529798 |
| H16 | H17 | 0.0056836536365  |
| N1  | H18 | 5.3562317828e-05 |
| C2  | H18 | 0.00024500947341 |
| C3  | H18 | 2.1152440346e-05 |
| O4  | H18 | 1.7811909815e-05 |
| C5  | H18 | 0.00035958334545 |
| C6  | H18 | 0.0058062666828  |
| C7  | H18 | 0.0085430056594  |
| C8  | H18 | 0.048988222298   |
| C9  | H18 | 0.97656773265    |
| N1  | H18 | 0.048894073043   |
| C11 | H18 | 0.0085657082187  |
| H12 | H18 | 1.5906881375e-06 |
| H13 | H18 | 4.3573800929e-05 |
| H14 | H18 | 7.9383431637e-05 |
| H15 | H18 | 0.00016323203042 |
| H16 | H18 | 0.001293193102   |
| H17 | H18 | 0.0055560968242  |
| N1  | H19 | 4.5338072772e-05 |
| C2  | H19 | 6.2556874434e-05 |
| C3  | H19 | 1.569090816e-05  |
| O4  | H19 | 1.5778340985e-05 |
| C5  | H19 | 0.0011565258501  |
| C6  | H19 | 0.0085403365262  |
| C7  | H19 | 0.0060932084124  |
| C8  | H19 | 0.008582313037   |
| C9  | H19 | 0.048525644516   |
| N1  | H19 | 0.9760978972     |
| C11 | H19 | 0.049595822703   |
| H12 | H19 | 2.0502377593e-06 |
| H13 | H19 | 3.5997326562e-05 |
| H14 | H19 | 0.00025906873638 |
| H15 | H19 | 5.6093839714e-05 |
| H16 | H19 | 0.00037519266077 |
| H17 | H19 | 0.0013927178222  |
| H18 | H19 | 0.0055257548929  |
| N1  | C2  | 0.00039272723676 |
| C2  | C2  | 0.0024022734295  |
| C3  | C2  | 0.00020935823186 |

|     |     |                  |
|-----|-----|------------------|
| O4  | C2  | 0.00017293671782 |
| C5  | C2  | 0.0094117936279  |
| C6  | C2  | 0.04712470433    |
| C7  | C2  | 0.0084793251705  |
| C8  | C2  | 0.0061441637617  |
| C9  | C2  | 0.0084713912908  |
| N1  | C2  | 0.049818423002   |
| C11 | C2  | 0.97127586815    |
| H12 | C2  | 6.2305797257e-05 |
| H13 | C2  | 0.0042642487679  |
| H14 | C2  | 0.00077197525065 |
| H15 | C2  | 0.0060314924058  |
| H16 | C2  | 0.0015621184666  |
| H17 | C2  | 0.00039091842526 |
| H18 | C2  | 0.0013403070484  |
| H19 | C2  | 0.0058647759157  |
| N1  | H21 | 0.8745338208     |
| C2  | H21 | 0.021427617135   |
| C3  | H21 | 0.0072916428316  |
| O4  | H21 | 0.0030768849017  |
| C5  | H21 | 0.0070080785118  |
| C6  | H21 | 0.00054597150326 |
| C7  | H21 | 0.00019805307657 |
| C8  | H21 | 3.3601327925e-05 |
| C9  | H21 | 8.1824852374e-05 |
| N1  | H21 | 1.6465615208e-05 |
| C11 | H21 | 0.00014247235108 |
| H12 | H21 | 0.015789022626   |
| H13 | H21 | 0.0010872504839  |
| H14 | H21 | 0.00042857813066 |
| H15 | H21 | 0.0058230447232  |
| H16 | H21 | 9.5706707486e-06 |
| H17 | H21 | 5.3091063604e-06 |
| H18 | H21 | 5.5228838483e-06 |
| H19 | H21 | 1.2621052841e-06 |
| C2  | H21 | 2.2910474581e-05 |
| N1  | O22 | 0.010575760818   |
| C2  | O22 | 0.087746488459   |
| C3  | O22 | 0.72436576489    |
| O4  | O22 | 0.27715554223    |
| C5  | O22 | 0.0082716445247  |
| C6  | O22 | 0.019064950348   |
| C7  | O22 | 0.016478296007   |
| C8  | O22 | 0.0027198307179  |
| C9  | O22 | 0.001230664916   |
| N1  | O22 | 0.0012168210553  |
| C11 | O22 | 0.0043788112571  |
| H12 | O22 | 0.00090684747504 |

|     |     |                  |
|-----|-----|------------------|
| H13 | O22 | 0.021107955578   |
| H14 | O22 | 0.00083413482969 |
| H15 | O22 | 0.0013343973321  |
| H16 | O22 | 0.0013704616278  |
| H17 | O22 | 8.8656822247e-05 |
| H18 | O22 | 7.2474566386e-05 |
| H19 | O22 | 6.3869853097e-05 |
| C2  | O22 | 0.00013388926398 |
| H21 | O22 | 0.0017428697746  |
| N1  | H23 | 0.00062272242196 |
| C2  | H23 | 0.0041265317083  |
| C3  | H23 | 0.0070176584344  |
| O4  | H23 | 0.0098934026518  |
| C5  | H23 | 0.0003475251301  |
| C6  | H23 | 0.0032538250816  |
| C7  | H23 | 0.00060504910826 |
| C8  | H23 | 0.00027886353265 |
| C9  | H23 | 0.00025008440151 |
| N1  | H23 | 0.00064046322394 |
| C11 | H23 | 0.0031627848254  |
| H12 | H23 | 0.00012963084956 |
| H13 | H23 | 0.0045269900892  |
| H14 | H23 | 0.00012869559122 |
| H15 | H23 | 3.3721891911e-05 |
| H16 | H23 | 1.7084835024e-05 |
| H17 | H23 | 1.5464427802e-05 |
| H18 | H23 | 1.3999684323e-05 |
| H19 | H23 | 1.7865364486e-05 |
| C2  | H23 | 0.0001298421474  |
| H21 | H23 | 3.516312096e-05  |
| O22 | H23 | 0.54803661174    |

## VALINE

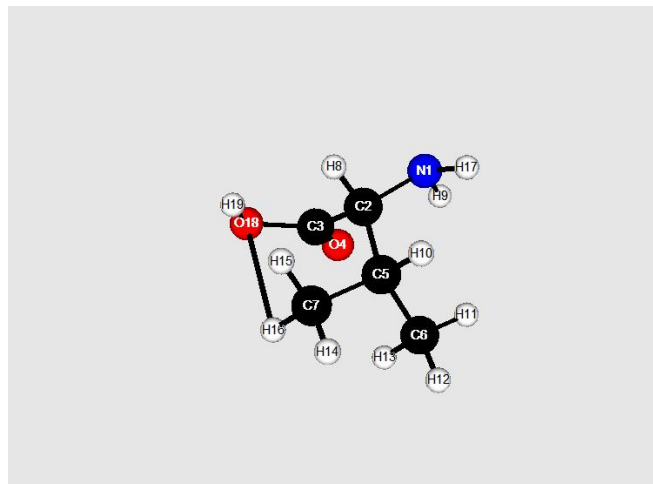

## HARTREE-FOCK

| Atom A | Atom B | Delocalization index |
|--------|--------|----------------------|
| N1     | C2     | 0.97423803026        |
| N1     | C3     | 0.058324909559       |
| C2     | C3     | 0.85664400864        |
| N1     | O4     | 0.052850120752       |
| C2     | O4     | 0.092795403482       |
| C3     | O4     | 1.1138057421         |
| N1     | C5     | 0.067005605872       |
| C2     | C5     | 0.91602044726        |
| C3     | C5     | 0.040314793829       |
| O4     | C5     | 0.01336779309        |
| N1     | C6     | 0.016131912537       |
| C2     | C6     | 0.037177412739       |
| C3     | C6     | 0.0055308028565      |
| O4     | C6     | 0.015441790518       |
| C5     | C6     | 0.96793513561        |
| N1     | C7     | 0.011462929014       |
| C2     | C7     | 0.041521779533       |
| C3     | C7     | 0.0041886489152      |
| O4     | C7     | 0.00099816045598     |
| C5     | C7     | 0.96763199379        |
| C6     | C7     | 0.045725920919       |
| N1     | H8     | 0.063855619125       |
| C2     | H8     | 0.90719823085        |
| C3     | H8     | 0.037418107225       |
| O4     | H8     | 0.01152402276        |
| C5     | H8     | 0.038079353191       |
| C6     | H8     | 0.0084481068741      |
| C7     | H8     | 0.0098121533591      |
| N1     | H9     | 0.8217122862         |
| C2     | H9     | 0.019478260443       |

|     |     |                  |
|-----|-----|------------------|
| C3  | H9  | 0.0034173266174  |
| O4  | H9  | 0.024235114321   |
| C5  | H9  | 0.0015030047989  |
| C6  | H9  | 0.0022989773265  |
| C7  | H9  | 0.00043304474677 |
| H8  | H9  | 0.0078858776178  |
| N1  | N1  | 0.014135207397   |
| C2  | N1  | 0.043484883463   |
| C3  | N1  | 0.0084026533328  |
| O4  | N1  | 0.0026981398312  |
| C5  | N1  | 0.93034180816    |
| C6  | N1  | 0.042184839604   |
| C7  | N1  | 0.043244812344   |
| H8  | N1  | 0.0042018399497  |
| H9  | N1  | 0.0003428020626  |
| N1  | H11 | 0.02138003543    |
| C2  | H11 | 0.0036653715712  |
| C3  | H11 | 0.00036250970374 |
| O4  | H11 | 0.002738655017   |
| C5  | H11 | 0.039823201565   |
| C6  | H11 | 0.95651254644    |
| C7  | H11 | 0.0099578889207  |
| H8  | H11 | 0.00047655279043 |
| H9  | H11 | 0.0041099388752  |
| N1  | H11 | 0.00329399195    |
| N1  | H12 | 0.0016527964302  |
| C2  | H12 | 0.009776992905   |
| C3  | H12 | 0.00085669776508 |
| O4  | H12 | 0.0019286581583  |
| C5  | H12 | 0.042141727563   |
| C6  | H12 | 0.96110882338    |
| C7  | H12 | 0.0081712974983  |
| H8  | H12 | 0.0016843427534  |
| H9  | H12 | 0.00035090697127 |
| N1  | H12 | 0.0043453660641  |
| H11 | H12 | 0.042320882611   |
| N1  | H13 | 0.00081456720436 |
| C2  | H13 | 0.0030798847876  |
| C3  | H13 | 0.0032534675692  |
| O4  | H13 | 0.019722196105   |
| C5  | H13 | 0.03987915183    |
| C6  | H13 | 0.95128450456    |
| C7  | H13 | 0.0073345105335  |
| H8  | H13 | 0.00032289418764 |
| H9  | H13 | 0.00010217421124 |
| N1  | H13 | 0.010993473985   |
| H11 | H13 | 0.041126592082   |
| H12 | H13 | 0.041483188763   |

|     |     |                  |
|-----|-----|------------------|
| N1  | H14 | 0.0024872336859  |
| C2  | H14 | 0.0094913037185  |
| C3  | H14 | 0.00056406794523 |
| O4  | H14 | 0.00022916318441 |
| C5  | H14 | 0.040005160916   |
| C6  | H14 | 0.0076916461577  |
| C7  | H14 | 0.95928398201    |
| H8  | H14 | 0.00093087914094 |
| H9  | H14 | 7.0085703515e-05 |
| N1  | H14 | 0.0045248001385  |
| H11 | H14 | 0.00076282135597 |
| H12 | H14 | 0.0069540817044  |
| H13 | H14 | 0.00050421091126 |
| N1  | H15 | 0.0010852685922  |
| C2  | H15 | 0.0078543690265  |
| C3  | H15 | 0.00046767840893 |
| O4  | H15 | 0.00033837670829 |
| C5  | H15 | 0.040736297385   |
| C6  | H15 | 0.010122536998   |
| C7  | H15 | 0.96158503311    |
| H8  | H15 | 0.0096659358417  |
| H9  | H15 | 0.00017805562496 |
| N1  | H15 | 0.0034565541093  |
| H11 | H15 | 0.0025366076521  |
| H12 | H15 | 0.00080230049036 |
| H13 | H15 | 0.00073634724589 |
| H14 | H15 | 0.043213726136   |
| N1  | H16 | 0.00058881110226 |
| C2  | H16 | 0.003056274397   |
| C3  | H16 | 0.002083378479   |
| O4  | H16 | 0.00094486142013 |
| C5  | H16 | 0.039577782554   |
| C6  | H16 | 0.007603380374   |
| C7  | H16 | 0.95282132987    |
| H8  | H16 | 0.00044099852741 |
| H9  | H16 | 2.5522506258e-05 |
| N1  | H16 | 0.010984569688   |
| H11 | H16 | 0.00075279751919 |
| H12 | H16 | 0.00053536048576 |
| H13 | H16 | 0.0057408523274  |
| H14 | H16 | 0.041608655581   |
| H15 | H16 | 0.04335783171    |
| N1  | H17 | 0.87353513403    |
| C2  | H17 | 0.021298712895   |
| C3  | H17 | 0.0071577813824  |
| O4  | H17 | 0.0029123625989  |
| C5  | H17 | 0.0071448446593  |
| C6  | H17 | 0.00097181421489 |

|     |     |                  |
|-----|-----|------------------|
| C7  | H17 | 0.00053276632612 |
| H8  | H17 | 0.0010383869024  |
| H9  | H17 | 0.015711937229   |
| N1  | H17 | 0.0062217424546  |
| H11 | H17 | 0.0014599591354  |
| H12 | H17 | 0.00012211820904 |
| H13 | H17 | 0.00015072239807 |
| H14 | H17 | 7.5448894175e-05 |
| H15 | H17 | 3.2799787777e-05 |
| H16 | H17 | 0.00019599756918 |
| N1  | O18 | 0.010960780923   |
| C2  | O18 | 0.087273172385   |
| C3  | O18 | 0.71761277717    |
| O4  | O18 | 0.27684995549    |
| C5  | O18 | 0.0077122257099  |
| C6  | O18 | 0.00091438154657 |
| C7  | O18 | 0.016176561983   |
| H8  | O18 | 0.022107802293   |
| H9  | O18 | 0.00090708625843 |
| N1  | O18 | 0.0013794958712  |
| H11 | O18 | 0.00013525630054 |
| H12 | O18 | 0.00026214390185 |
| H13 | O18 | 0.00073249727329 |
| H14 | O18 | 0.0022329765597  |
| H15 | O18 | 0.0033582865712  |
| H16 | O18 | 0.020554879374   |
| H17 | O18 | 0.001776764712   |
| N1  | H19 | 0.00072749182273 |
| C2  | H19 | 0.0044655869218  |
| C3  | H19 | 0.0071127322979  |
| O4  | H19 | 0.010177984605   |
| C5  | H19 | 0.00038909016349 |
| C6  | H19 | 0.00019044299097 |
| C7  | H19 | 0.0024145914208  |
| H8  | H19 | 0.0053124810311  |
| H9  | H19 | 0.00014616599719 |
| N1  | H19 | 4.3929243501e-05 |
| H11 | H19 | 1.9343383359e-05 |
| H12 | H19 | 2.1537244975e-05 |
| H13 | H19 | 1.5293305013e-05 |
| H14 | H19 | 0.000447841088   |
| H15 | H19 | 0.0020350784588  |
| H16 | H19 | 0.00072409872163 |
| H17 | H19 | 3.5980898811e-05 |
| O18 | H19 | 0.55786377916    |



## TRYPTOPHAN

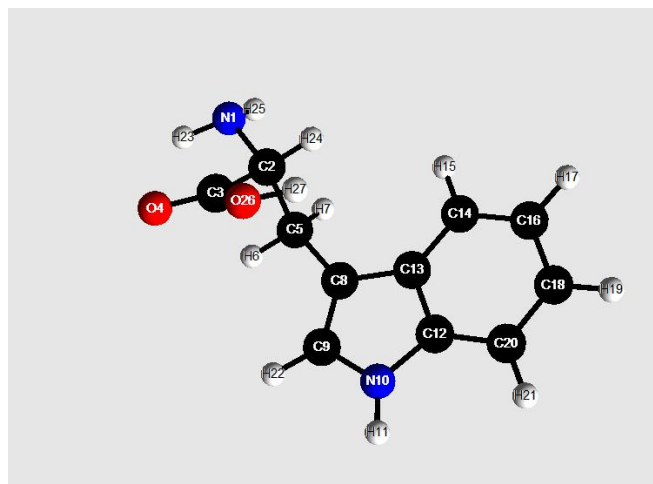

## HARTREE-FOCK

| Atom A | Atom B | Delocalization index |
|--------|--------|----------------------|
| N1     | C2     | 0.97332966826        |
| N1     | C3     | 0.058596324953       |
| C2     | C3     | 0.85296677302        |
| N1     | O4     | 0.05136970983        |
| C2     | O4     | 0.094496397462       |
| C3     | O4     | 1.1061329087         |
| N1     | C5     | 0.075268166865       |
| C2     | C5     | 0.92085992626        |
| C3     | C5     | 0.042715316024       |
| O4     | C5     | 0.019878933822       |
| N1     | H6     | 0.011842777192       |
| C2     | H6     | 0.037478981311       |
| C3     | H6     | 0.0046012117002      |
| O4     | H6     | 0.011556037379       |
| C5     | H6     | 0.9387452811         |
| N1     | H7     | 0.014407764835       |
| C2     | H7     | 0.040115051634       |
| C3     | H7     | 0.0083894549039      |
| O4     | H7     | 0.0032994689105      |
| C5     | H7     | 0.93862247336        |
| H6     | H7     | 0.039094443383       |
| N1     | C8     | 0.013021315997       |
| C2     | C8     | 0.043446937897       |
| C3     | C8     | 0.0077264128372      |
| O4     | C8     | 0.0031257112428      |
| C5     | C8     | 1.0043343945         |
| H6     | C8     | 0.042112971814       |
| H7     | C8     | 0.043674087579       |
| N1     | C9     | 0.0027559452477      |
| C2     | C9     | 0.012987434168       |

|     |     |                  |
|-----|-----|------------------|
| C3  | C9  | 0.0028639336756  |
| O4  | C9  | 0.0029113353938  |
| C5  | C9  | 0.053856673905   |
| H6  | C9  | 0.0105875375     |
| H7  | C9  | 0.012027067584   |
| C8  | C9  | 1.5223184238     |
| N1  | N1  | 0.0009487105987  |
| C2  | N1  | 0.0038270884915  |
| C3  | N1  | 0.00041456500855 |
| O4  | N1  | 0.00028226443714 |
| C5  | N1  | 0.012453378093   |
| H6  | N1  | 0.0011049187067  |
| H7  | N1  | 0.003378355643   |
| C8  | N1  | 0.15998272417    |
| C9  | N1  | 1.0057827631     |
| N1  | H11 | 7.2646604876e-05 |
| C2  | H11 | 0.00015953201209 |
| C3  | H11 | 9.8502685614e-06 |
| O4  | H11 | 6.1335760283e-06 |
| C5  | H11 | 0.0010365298692  |
| H6  | H11 | 3.5479640909e-05 |
| H7  | H11 | 0.00019604781465 |
| C8  | H11 | 0.0072803550058  |
| C9  | H11 | 0.015821211895   |
| N1  | H11 | 0.79022301853    |
| N1  | C12 | 0.00023228071144 |
| C2  | C12 | 0.00075142534299 |
| C3  | C12 | 0.00020689326359 |
| O4  | C12 | 0.00022548557735 |
| C5  | C12 | 0.0067383528965  |
| H6  | C12 | 0.0011816785676  |
| H7  | C12 | 0.00056952948904 |
| C8  | C12 | 0.06265248567    |
| C9  | C12 | 0.06907258291    |
| N1  | C12 | 0.98608460336    |
| H11 | C12 | 0.016037702661   |
| N1  | C13 | 0.0011013600392  |
| C2  | C13 | 0.0060029686169  |
| C3  | C13 | 0.00051832492639 |
| O4  | C13 | 0.00043300994823 |
| C5  | C13 | 0.036662285585   |
| H6  | C13 | 0.0075364647812  |
| H7  | C13 | 0.0058498792391  |
| C8  | C13 | 1.1413389094     |
| C9  | C13 | 0.080183651998   |
| N1  | C13 | 0.12715230879    |
| H11 | C13 | 0.0073379154183  |
| C12 | C13 | 1.2338541718     |

|     |     |                  |
|-----|-----|------------------|
| N1  | C14 | 0.0003768532482  |
| C2  | C14 | 0.0025640700055  |
| C3  | C14 | 0.00026966694151 |
| O4  | C14 | 0.00021859492646 |
| C5  | C14 | 0.0047213834721  |
| H6  | C14 | 0.00051830878535 |
| H7  | C14 | 0.0036998436223  |
| C8  | C14 | 0.044640439488   |
| C9  | C14 | 0.025798880768   |
| N1  | C14 | 0.013471314613   |
| H11 | C14 | 0.0011264129846  |
| C12 | C14 | 0.065337972531   |
| C13 | C14 | 1.2949194577     |
| N1  | H15 | 0.00035176391147 |
| C2  | H15 | 0.0029525359838  |
| C3  | H15 | 0.00026007232568 |
| O4  | H15 | 0.00021110254705 |
| C5  | H15 | 0.0035232016707  |
| H6  | H15 | 0.00045967933718 |
| H7  | H15 | 0.0041284093771  |
| C8  | H15 | 0.0041665043839  |
| C9  | H15 | 0.0011686073443  |
| N1  | H15 | 0.0017558115851  |
| H11 | H15 | 0.0003037585656  |
| C12 | H15 | 0.0081059954647  |
| C13 | H15 | 0.04502450813    |
| C14 | H15 | 0.97266481061    |
| N1  | C16 | 8.3101837283e-05 |
| C2  | C16 | 0.00043733840905 |
| C3  | C16 | 4.3126194122e-05 |
| O4  | C16 | 3.7013728797e-05 |
| C5  | C16 | 0.00064204844289 |
| H6  | C16 | 0.00010207112796 |
| H7  | C16 | 0.00057963311934 |
| C8  | C16 | 0.01612658199    |
| C9  | C16 | 0.007793148952   |
| N1  | C16 | 0.019258616788   |
| H11 | C16 | 0.00050965989616 |
| C12 | C16 | 0.072921689222   |
| C13 | C16 | 0.071307325134   |
| C14 | C16 | 1.4567165703     |
| H15 | C16 | 0.051104294411   |
| N1  | H17 | 7.2441633076e-06 |
| C2  | H17 | 2.4251108158e-05 |
| C3  | H17 | 2.1459868211e-06 |
| O4  | H17 | 3.0780894697e-06 |
| C5  | H17 | 3.9314491769e-05 |
| H6  | H17 | 1.5891319415e-05 |

|     |     |                  |
|-----|-----|------------------|
| H7  | H17 | 2.8293135295e-05 |
| C8  | H17 | 0.0017641778214  |
| C9  | H17 | 0.00066164685599 |
| N1  | H17 | 0.001480365048   |
| H11 | H17 | 4.6291982693e-05 |
| C12 | H17 | 0.0048505070389  |
| C13 | H17 | 0.0091421982739  |
| C14 | H17 | 0.053180191266   |
| H15 | H17 | 0.0060590291085  |
| C16 | H17 | 0.97882992124    |
| N1  | C18 | 4.6452105037e-05 |
| C2  | C18 | 0.0002649771703  |
| C3  | C18 | 9.0321286244e-05 |
| O4  | C18 | 9.7441523536e-05 |
| C5  | C18 | 0.00058046812012 |
| H6  | C18 | 0.00015276597899 |
| H7  | C18 | 0.00029183492772 |
| C8  | C18 | 0.0076514726858  |
| C9  | C18 | 0.021929703524   |
| N1  | C18 | 0.019168939023   |
| H11 | C18 | 0.00030920805442 |
| C12 | C18 | 0.073732311945   |
| C13 | C18 | 0.075204115094   |
| C14 | C18 | 0.073585572999   |
| H15 | C18 | 0.0087750865863  |
| C16 | C18 | 1.3155007996     |
| H17 | C18 | 0.047400456461   |
| N1  | H19 | 4.98658853e-06   |
| C2  | H19 | 2.5949374974e-05 |
| C3  | H19 | 6.891124967e-06  |
| O4  | H19 | 7.2982405586e-06 |
| C5  | H19 | 4.8527604665e-05 |
| H6  | H19 | 1.2439698637e-05 |
| H7  | H19 | 3.4166250835e-05 |
| C8  | H19 | 0.00056951899145 |
| C9  | H19 | 0.0017537196881  |
| N1  | H19 | 0.0019846834922  |
| H11 | H19 | 1.7534334032e-05 |
| C12 | H19 | 0.0088756886227  |
| C13 | H19 | 0.0048782916662  |
| C14 | H19 | 0.00837949062    |
| H15 | H19 | 0.0012933697067  |
| C16 | H19 | 0.046327481269   |
| H17 | H19 | 0.0054916005925  |
| C18 | H19 | 0.97657663578    |
| N1  | C2  | 5.3450219213e-05 |
| C2  | C2  | 0.00018957674277 |
| C3  | C2  | 3.2909647333e-05 |

|     |     |                  |
|-----|-----|------------------|
| O4  | C2  | 3.1772882355e-05 |
| C5  | C2  | 0.0010092686273  |
| H6  | C2  | 0.00024605945713 |
| H7  | C2  | 0.00021769016245 |
| C8  | C2  | 0.0077315510605  |
| C9  | C2  | 0.014387362876   |
| N1  | C2  | 0.086741412      |
| H11 | C2  | 0.0024440476542  |
| C12 | C2  | 1.2747044997     |
| C13 | C2  | 0.056449669363   |
| C14 | C2  | 0.093202958461   |
| H15 | C2  | 0.0058390472937  |
| C16 | C2  | 0.071832270707   |
| H17 | C2  | 0.0085064826753  |
| C18 | C2  | 1.4515627807     |
| H19 | C2  | 0.052662951131   |
| N1  | H21 | 1.3682230915e-05 |
| C2  | H21 | 2.2020232527e-05 |
| C3  | H21 | 2.7440539774e-06 |
| O4  | H21 | 3.2876874683e-06 |
| C5  | H21 | 0.00033724732219 |
| H6  | H21 | 6.5363884711e-05 |
| H7  | H21 | 2.2500160904e-05 |
| C8  | H21 | 0.0013445607445  |
| C9  | H21 | 0.00050014851878 |
| N1  | H21 | 0.008258411547   |
| H11 | H21 | 0.0012430621854  |
| C12 | H21 | 0.0470234815     |
| C13 | H21 | 0.0075289208757  |
| C14 | H21 | 0.0058153061306  |
| H15 | H21 | 0.0004221283014  |
| C16 | H21 | 0.0087854806075  |
| H17 | H21 | 0.0012851783442  |
| C18 | H21 | 0.049738260484   |
| H19 | H21 | 0.0059783293842  |
| C2  | H21 | 0.97665436702    |
| N1  | H22 | 0.0001458327061  |
| C2  | H22 | 0.00065293037872 |
| C3  | H22 | 0.00028059761755 |
| O4  | H22 | 0.001462364971   |
| C5  | H22 | 0.0048712301764  |
| H6  | H22 | 0.0037734888712  |
| H7  | H22 | 0.00060638642923 |
| C8  | H22 | 0.045984412695   |
| C9  | H22 | 0.9497298324     |
| N1  | H22 | 0.061006348347   |
| H11 | H22 | 0.0013899285828  |
| C12 | H22 | 0.0090068378009  |

|     |     |                  |
|-----|-----|------------------|
| C13 | H22 | 0.0090130698974  |
| C14 | H22 | 0.002337358181   |
| H15 | H22 | 7.4807362659e-05 |
| C16 | H22 | 0.00084207980984 |
| H17 | H22 | 0.0001072129742  |
| C18 | H22 | 0.001796112858   |
| H19 | H22 | 0.00017435639071 |
| C2  | H22 | 0.0016503775773  |
| H21 | H22 | 3.5524254334e-05 |
| N1  | H23 | 0.83053985283    |
| C2  | H23 | 0.019943151347   |
| C3  | H23 | 0.0030672584428  |
| O4  | H23 | 0.022151335321   |
| C5  | H23 | 0.002398491526   |
| H6  | H23 | 0.0015175426305  |
| H7  | H23 | 0.00029721321408 |
| C8  | H23 | 0.00030385416799 |
| C9  | H23 | 7.1956817309e-05 |
| N1  | H23 | 2.426258326e-05  |
| H11 | H23 | 1.6264761021e-06 |
| C12 | H23 | 1.4520284947e-05 |
| C13 | H23 | 0.00011033358522 |
| C14 | H23 | 8.1761830092e-05 |
| H15 | H23 | 7.6095533418e-05 |
| C16 | H23 | 8.1053163546e-06 |
| H17 | H23 | 4.7188924883e-07 |
| C18 | H23 | 7.7635843027e-06 |
| H19 | H23 | 7.5332145265e-07 |
| C2  | H23 | 5.8592832792e-06 |
| H21 | H23 | 7.9210379693e-07 |
| H22 | H23 | 5.1745893541e-06 |
| N1  | H24 | 0.061697980184   |
| C2  | H24 | 0.90943866827    |
| C3  | H24 | 0.035124195749   |
| O4  | H24 | 0.010936544284   |
| C5  | H24 | 0.037875641177   |
| H6  | H24 | 0.0095759866625  |
| H7  | H24 | 0.0032065207554  |
| C8  | H24 | 0.0059540993999  |
| C9  | H24 | 0.00058857649555 |
| N1  | H24 | 0.0004033282709  |
| H11 | H24 | 1.5186338977e-05 |
| C12 | H24 | 0.00040404523808 |
| C13 | H24 | 0.0055111354971  |
| C14 | H24 | 0.0076364514037  |
| H15 | H24 | 0.0061673073294  |
| C16 | H24 | 0.00090121713994 |
| H17 | H24 | 3.2134631064e-05 |

|     |     |                  |
|-----|-----|------------------|
| C18 | H24 | 0.00038580006794 |
| H19 | H24 | 4.0340639045e-05 |
| C2  | H24 | 0.00039234348738 |
| H21 | H24 | 2.4882889668e-05 |
| H22 | H24 | 9.0039415429e-05 |
| H23 | H24 | 0.0083805026334  |
| N1  | H25 | 0.87586792227    |
| C2  | H25 | 0.021365730835   |
| C3  | H25 | 0.0074204594586  |
| O4  | H25 | 0.0030820999562  |
| C5  | H25 | 0.0066296595884  |
| H6  | H25 | 0.00042723637956 |
| H7  | H25 | 0.0054695226682  |
| C8  | H25 | 0.00056922476547 |
| C9  | H25 | 0.00029635345673 |
| N1  | H25 | 0.00010400605503 |
| H11 | H25 | 4.8706269104e-06 |
| C12 | H25 | 1.5076746786e-05 |
| C13 | H25 | 5.8021629367e-05 |
| C14 | H25 | 2.5729011472e-05 |
| H15 | H25 | 3.1576471477e-05 |
| C16 | H25 | 1.0791021018e-05 |
| H17 | H25 | 7.630645958e-07  |
| C18 | H25 | 7.4755583858e-06 |
| H19 | H25 | 7.7592287249e-07 |
| C2  | H25 | 5.4291224045e-06 |
| H21 | H25 | 6.3203031795e-07 |
| H22 | H25 | 1.1329183637e-05 |
| H23 | H25 | 0.015998658258   |
| H24 | H25 | 0.0011394311602  |
| N1  | O26 | 0.01041028393    |
| C2  | O26 | 0.087090363861   |
| C3  | O26 | 0.72423598201    |
| O4  | O26 | 0.27715013677    |
| C5  | O26 | 0.0080871080632  |
| H6  | O26 | 0.00087832871795 |
| H7  | O26 | 0.0014090818263  |
| C8  | O26 | 0.021785410053   |
| C9  | O26 | 0.012171646175   |
| N1  | O26 | 0.0019927346775  |
| H11 | O26 | 3.8355432509e-05 |
| C12 | O26 | 0.00093190892827 |
| C13 | O26 | 0.0049535364578  |
| C14 | O26 | 0.00068342374615 |
| H15 | O26 | 6.4247070642e-05 |
| C16 | O26 | 0.00017450688507 |
| H17 | O26 | 1.3929822423e-05 |
| C18 | O26 | 0.00026355079568 |

|     |     |                  |
|-----|-----|------------------|
| H19 | O26 | 1.8461434321e-05 |
| C2  | O26 | 0.0001031206266  |
| H21 | O26 | 6.1693626947e-06 |
| H22 | O26 | 0.00055055157998 |
| H23 | O26 | 0.00087167369356 |
| H24 | O26 | 0.02160431638    |
| H25 | O26 | 0.0017097314314  |
| N1  | H27 | 0.00060276366043 |
| C2  | H27 | 0.0042157900794  |
| C3  | H27 | 0.0070208907752  |
| O4  | H27 | 0.0098495168976  |
| C5  | H27 | 0.00029090668795 |
| H6  | H27 | 0.00012272101035 |
| H7  | H27 | 3.1513817616e-05 |
| C8  | H27 | 0.0019248995829  |
| C9  | H27 | 0.00027279683121 |
| N1  | H27 | 0.00034034470066 |
| H11 | H27 | 8.9374015478e-06 |
| C12 | H27 | 0.00047769124319 |
| C13 | H27 | 0.0030934611624  |
| C14 | H27 | 0.0010098265822  |
| H15 | H27 | 5.1030694934e-05 |
| C16 | H27 | 0.00012511767858 |
| H17 | H27 | 5.4674541025e-06 |
| C18 | H27 | 0.00019463318666 |
| H19 | H27 | 1.1372327319e-05 |
| C2  | H27 | 8.1949786341e-05 |
| H21 | H27 | 4.1262637096e-06 |
| H22 | H27 | 8.7681270547e-06 |
| H23 | H27 | 0.00013223011091 |
| H24 | H27 | 0.0047950961495  |
| H25 | H27 | 3.3608797121e-05 |
| O26 | H27 | 0.54749356245    |



## ISOLEUCINE

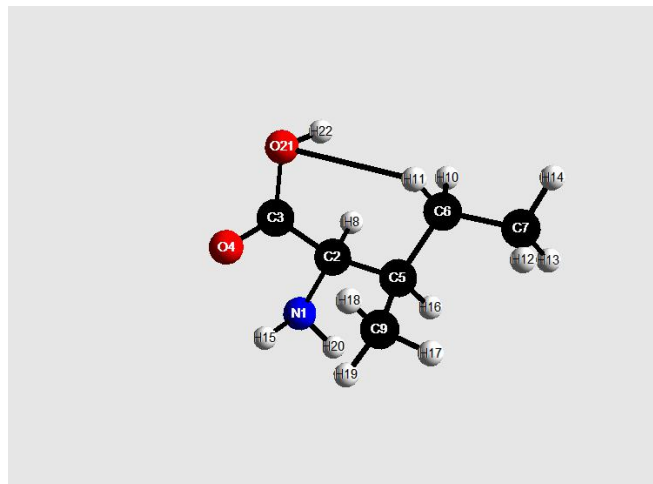

### HARTREE-FOCK

| Atom A | Atom B | Delocalization index |
|--------|--------|----------------------|
| N1     | C2     | 0.97370540456        |
| N1     | C3     | 0.058347895861       |
| C2     | C3     | 0.85710837846        |
| N1     | O4     | 0.053339923208       |
| C2     | O4     | 0.092607418507       |
| C3     | O4     | 1.1135503338         |
| N1     | C5     | 0.066622557842       |
| C2     | C5     | 0.91456578424        |
| C3     | C5     | 0.040255646237       |
| O4     | C5     | 0.013225148807       |
| N1     | C6     | 0.010988714686       |
| C2     | C6     | 0.040286370108       |
| C3     | C6     | 0.0037451170548      |
| O4     | C6     | 0.00087584482662     |
| C5     | C6     | 0.95608572124        |
| N1     | C7     | 0.0020203012745      |
| C2     | C7     | 0.0081079266873      |
| C3     | C7     | 0.00054851228948     |
| O4     | C7     | 0.00022580151896     |
| C5     | C7     | 0.039754009961       |
| C6     | C7     | 0.97601897357        |
| N1     | H8     | 0.063844721819       |
| C2     | H8     | 0.90577522003        |
| C3     | H8     | 0.037563394725       |
| O4     | H8     | 0.011526923007       |
| C5     | H8     | 0.037529066488       |
| C6     | H8     | 0.010241116727       |
| C7     | H8     | 0.00090248111297     |
| N1     | C9     | 0.016382453529       |
| C2     | C9     | 0.037745251287       |

|     |     |                  |
|-----|-----|------------------|
| C3  | C9  | 0.0058946334668  |
| O4  | C9  | 0.015812151808   |
| C5  | C9  | 0.96794398093    |
| C6  | C9  | 0.041006102278   |
| C7  | C9  | 0.0085383832755  |
| H8  | C9  | 0.0083574700045  |
| N1  | N1  | 0.0012949227958  |
| C2  | N1  | 0.010569216136   |
| C3  | N1  | 0.00057412951269 |
| O4  | N1  | 0.00041985459903 |
| C5  | N1  | 0.041478631025   |
| C6  | N1  | 0.94330594661    |
| C7  | N1  | 0.044191484176   |
| H8  | N1  | 0.013188361893   |
| C9  | N1  | 0.009392514809   |
| N1  | H11 | 0.00053567410956 |
| C2  | H11 | 0.0027531105109  |
| C3  | H11 | 0.0020333150713  |
| O4  | H11 | 0.00085582521521 |
| C5  | H11 | 0.039921038928   |
| C6  | H11 | 0.93977738954    |
| C7  | H11 | 0.041548953832   |
| H8  | H11 | 0.00052865751838 |
| C9  | H11 | 0.0079995234604  |
| N1  | H11 | 0.043276535644   |
| N1  | H12 | 0.00013078561143 |
| C2  | H12 | 0.00047180887897 |
| C3  | H12 | 2.9043389183e-05 |
| O4  | H12 | 3.6723813365e-05 |
| C5  | H12 | 0.0030432456438  |
| C6  | H12 | 0.040588288841   |
| C7  | H12 | 0.95795632945    |
| H8  | H12 | 0.00031265639535 |
| C9  | H12 | 0.0094622543443  |
| N1  | H12 | 0.011114558084   |
| H11 | H12 | 0.0038132191397  |
| N1  | H13 | 8.5418087055e-05 |
| C2  | H13 | 0.00060602595534 |
| C3  | H13 | 0.00019621703688 |
| O4  | H13 | 7.5216959132e-05 |
| C5  | H13 | 0.0074131014518  |
| C6  | H13 | 0.042050589855   |
| C7  | H13 | 0.96172703923    |
| H8  | H13 | 4.8808649131e-05 |
| C9  | H13 | 0.00077709545106 |
| N1  | H13 | 0.0033901557887  |
| H11 | H13 | 0.010920450778   |
| H12 | H13 | 0.043762003002   |

|     |     |                  |
|-----|-----|------------------|
| N1  | H14 | 0.00060419239178 |
| C2  | H14 | 0.0014849453537  |
| C3  | H14 | 5.947167406e-05  |
| O4  | H14 | 4.97243895e-05   |
| C5  | H14 | 0.0098957677992  |
| C6  | H14 | 0.042933222806   |
| C7  | H14 | 0.9648306237     |
| H8  | H14 | 4.3395302668e-05 |
| C9  | H14 | 0.0010498388907  |
| N1  | H14 | 0.0048835993078  |
| H11 | H14 | 0.0034448488378  |
| H12 | H14 | 0.042807411465   |
| H13 | H14 | 0.043641029029   |
| N1  | H15 | 0.82057191513    |
| C2  | H15 | 0.019408195974   |
| C3  | H15 | 0.0034879016568  |
| O4  | H15 | 0.02485780117    |
| C5  | H15 | 0.0014762373143  |
| C6  | H15 | 0.00043811801268 |
| C7  | H15 | 6.3482604449e-05 |
| H8  | H15 | 0.0077510599869  |
| C9  | H15 | 0.0022970030223  |
| N1  | H15 | 0.000219632952   |
| H11 | H15 | 2.7812139268e-05 |
| H12 | H15 | 1.3996601404e-05 |
| H13 | H15 | 3.766672733e-06  |
| H14 | H15 | 1.2777824909e-05 |
| N1  | H16 | 0.014651961449   |
| C2  | H16 | 0.043116922865   |
| C3  | H16 | 0.008238514172   |
| O4  | H16 | 0.0026234594551  |
| C5  | H16 | 0.92622605138    |
| C6  | H16 | 0.040635858169   |
| C7  | H16 | 0.0094032679027  |
| H8  | H16 | 0.0039876841248  |
| C9  | H16 | 0.042092097778   |
| N1  | H16 | 0.002942663715   |
| H11 | H16 | 0.010420669016   |
| H12 | H16 | 0.00044032915721 |
| H13 | H16 | 0.0080087928019  |
| H14 | H16 | 0.00091299047516 |
| H15 | H16 | 0.0003566459388  |
| N1  | H17 | 0.0015432923163  |
| C2  | H17 | 0.0095860401488  |
| C3  | H17 | 0.00088564174104 |
| O4  | H17 | 0.0019674808935  |
| C5  | H17 | 0.041058267132   |
| C6  | H17 | 0.0035636783117  |

|     |     |                  |
|-----|-----|------------------|
| C7  | H17 | 0.010464453489   |
| H8  | H17 | 0.0016950621808  |
| C9  | H17 | 0.9569618498     |
| N1  | H17 | 0.00038656001754 |
| H11 | H17 | 0.00039053678698 |
| H12 | H17 | 0.014887253813   |
| H13 | H17 | 0.00098183623317 |
| H14 | H17 | 0.0014212503251  |
| H15 | H17 | 0.00032060450518 |
| H16 | H17 | 0.0045479051163  |
| N1  | H18 | 0.00090530799615 |
| C2  | H18 | 0.0029015997232  |
| C3  | H18 | 0.0032609005332  |
| O4  | H18 | 0.018115740087   |
| C5  | H18 | 0.039974639662   |
| C6  | H18 | 0.0073685454617  |
| C7  | H18 | 0.00070926995712 |
| H8  | H18 | 0.00032376959319 |
| C9  | H18 | 0.95159639706    |
| N1  | H18 | 0.00067590573067 |
| H11 | H18 | 0.0064357984277  |
| H12 | H18 | 0.00083302942208 |
| H13 | H18 | 0.00022147144954 |
| H14 | H18 | 6.1373224776e-05 |
| H15 | H18 | 9.8387726387e-05 |
| H16 | H18 | 0.01091345696    |
| H17 | H18 | 0.04144645415    |
| N1  | H19 | 0.022998131702   |
| C2  | H19 | 0.0043137132146  |
| C3  | H19 | 0.0004450100361  |
| O4  | H19 | 0.0038031415244  |
| C5  | H19 | 0.039728348739   |
| C6  | H19 | 0.0095375743549  |
| C7  | H19 | 0.00096487829329 |
| H8  | H19 | 0.00050692911983 |
| C9  | H19 | 0.95424093803    |
| N1  | H19 | 0.0021214559651  |
| H11 | H19 | 0.00074749657131 |
| H12 | H19 | 0.0012478260392  |
| H13 | H19 | 7.1382972453e-05 |
| H14 | H19 | 0.00012007111873 |
| H15 | H19 | 0.0044502452956  |
| H16 | H19 | 0.0029196714548  |
| H17 | H19 | 0.041748819395   |
| H18 | H19 | 0.041089875325   |
| N1  | C2  | 0.87345811133    |
| C2  | C2  | 0.021282307506   |
| C3  | C2  | 0.0071141108265  |

|     |     |                  |
|-----|-----|------------------|
| O4  | C2  | 0.002908831651   |
| C5  | C2  | 0.0073253742474  |
| C6  | C2  | 0.00053358819593 |
| C7  | C2  | 7.2800989745e-05 |
| H8  | C2  | 0.0010359719798  |
| C9  | C2  | 0.0009590149268  |
| N1  | C2  | 3.7628521444e-05 |
| H11 | C2  | 0.00019108848365 |
| H12 | C2  | 4.6560875127e-06 |
| H13 | C2  | 1.7684167771e-05 |
| H14 | C2  | 1.5843705493e-05 |
| H15 | C2  | 0.015682922884   |
| H16 | C2  | 0.0065015823768  |
| H17 | C2  | 0.00011862606261 |
| H18 | C2  | 0.00015463934377 |
| H19 | C2  | 0.0014662944619  |
| N1  | O21 | 0.011034796089   |
| C2  | O21 | 0.087113704326   |
| C3  | O21 | 0.71753360039    |
| O4  | O21 | 0.27675912365    |
| C5  | O21 | 0.0076962887151  |
| C6  | O21 | 0.015511391156   |
| C7  | O21 | 0.0020451422253  |
| H8  | O21 | 0.021750871344   |
| C9  | O21 | 0.00095769172638 |
| N1  | O21 | 0.0048621190661  |
| H11 | O21 | 0.021054275391   |
| H12 | O21 | 0.00012254300263 |
| H13 | O21 | 0.00049266971852 |
| H14 | O21 | 6.9253445855e-05 |
| H15 | O21 | 0.00091818425669 |
| H16 | O21 | 0.0013359552339  |
| H17 | O21 | 0.00025061704133 |
| H18 | O21 | 0.00078345864666 |
| H19 | O21 | 0.00017111824574 |
| C2  | O21 | 0.0017832986175  |
| N1  | H22 | 0.00069906284509 |
| C2  | H22 | 0.0042954252264  |
| C3  | H22 | 0.0070883581819  |
| O4  | H22 | 0.010145455599   |
| C5  | H22 | 0.00044635808335 |
| C6  | H22 | 0.0028146331408  |
| C7  | H22 | 0.00046187573216 |
| H8  | H22 | 0.0050843816347  |
| C9  | H22 | 0.00020967539851 |
| N1  | H22 | 0.0029840013609  |
| H11 | H22 | 0.00080314221707 |
| H12 | H22 | 0.000110868701   |

|     |     |                  |
|-----|-----|------------------|
| H13 | H22 | 2.5493843088e-05 |
| H14 | H22 | 1.6740590567e-05 |
| H15 | H22 | 0.00013863484817 |
| H16 | H22 | 4.3295944823e-05 |
| H17 | H22 | 2.3026659676e-05 |
| H18 | H22 | 1.4405390608e-05 |
| H19 | H22 | 2.1578974227e-05 |
| C2  | H22 | 3.604596144e-05  |
| O21 | H22 | 0.55674217172    |

## THREONINE

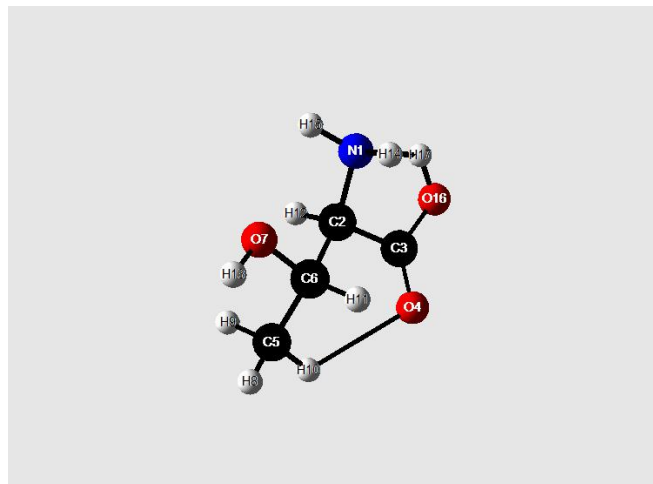

## HARTREE-FOCK

| Atom A | Atom B | Delocalization index |
|--------|--------|----------------------|
| N1     | C2     | 0.95848750317        |
| N1     | C3     | 0.056513113381       |
| C2     | C3     | 0.85654309592        |
| N1     | O4     | 0.014117788972       |
| C2     | O4     | 0.099735381095       |
| C3     | O4     | 1.1078884774         |
| N1     | C5     | 0.0095254015508      |
| C2     | C5     | 0.037087747261       |
| C3     | C5     | 0.0021019391103      |
| O4     | C5     | 0.02363655247        |
| N1     | C6     | 0.059028763827       |
| C2     | C6     | 0.89768084509        |
| C3     | C6     | 0.031084150487       |
| O4     | C6     | 0.020871489228       |
| C5     | C6     | 0.94261374792        |
| N1     | O7     | 0.0565298569         |
| C2     | O7     | 0.076685026399       |
| C3     | O7     | 0.0075580011321      |
| O4     | O7     | 0.0029055073975      |
| C5     | O7     | 0.091597576034       |
| C6     | O7     | 0.78201202742        |
| N1     | H8     | 0.0027294124677      |
| C2     | H8     | 0.0090557845188      |
| C3     | H8     | 0.0002279506181      |
| O4     | H8     | 0.0021471212845      |
| C5     | H8     | 0.96225622955        |
| C6     | H8     | 0.042677123965       |
| O7     | H8     | 0.014340373253       |
| N1     | H9     | 0.00076999486581     |
| C2     | H9     | 0.0073104582327      |

|     |     |                  |
|-----|-----|------------------|
| C3  | H9  | 0.00041923159816 |
| O4  | H9  | 0.0013887629526  |
| C5  | H9  | 0.9584573423     |
| C6  | H9  | 0.040478282134   |
| O7  | H9  | 0.013383140024   |
| H8  | H9  | 0.043641759504   |
| N1  | N1  | 0.00037939440761 |
| C2  | N1  | 0.0023147236856  |
| C3  | N1  | 0.0012719094496  |
| O4  | N1  | 0.03807752408    |
| C5  | N1  | 0.94279168391    |
| C6  | N1  | 0.035680088835   |
| O7  | N1  | 0.014575101306   |
| H8  | N1  | 0.038515743328   |
| H9  | N1  | 0.038075447222   |
| N1  | H11 | 0.0060623249242  |
| C2  | H11 | 0.038352104907   |
| C3  | H11 | 0.0046499857114  |
| O4  | H11 | 0.012864208229   |
| C5  | H11 | 0.038465394684   |
| C6  | H11 | 0.90401803949    |
| O7  | H11 | 0.079120262773   |
| H8  | H11 | 0.0038161375098  |
| H9  | H11 | 0.010489954991   |
| N1  | H11 | 0.0024475886247  |
| N1  | H12 | 0.059242590843   |
| C2  | H12 | 0.90475399697    |
| C3  | H12 | 0.042781469989   |
| O4  | H12 | 0.014422591202   |
| C5  | H12 | 0.010352248797   |
| C6  | H12 | 0.033074989602   |
| O7  | H12 | 0.0077151757978  |
| H8  | H12 | 0.0011062763974  |
| H9  | H12 | 0.0080580019994  |
| N1  | H12 | 0.00049677450294 |
| H11 | H12 | 0.008933660043   |
| N1  | H13 | 0.0015773477195  |
| C2  | H13 | 0.006090413126   |
| C3  | H13 | 0.00085474140694 |
| O4  | H13 | 0.00012207437454 |
| C5  | H13 | 0.0040113739388  |
| C6  | H13 | 0.010210639367   |
| O7  | H13 | 0.60096349672    |
| H8  | H13 | 0.0033796212452  |
| H9  | H13 | 0.00020477354333 |
| N1  | H13 | 0.00036424034642 |
| H11 | H13 | 0.00067609097158 |
| H12 | H13 | 0.00016884932947 |



|     |     |                  |
|-----|-----|------------------|
| N1  | H14 | 0.86695607667    |
| C2  | H14 | 0.021418321388   |
| C3  | H14 | 0.0016440921321  |
| O4  | H14 | 0.00062913158829 |
| C5  | H14 | 0.00044636913936 |
| C6  | H14 | 0.0044284016609  |
| O7  | H14 | 0.0033879469666  |
| H8  | H14 | 4.8037738481e-05 |
| H9  | H14 | 0.0002279643333  |
| N1  | H14 | 1.7574154348e-05 |
| H11 | H14 | 0.002463405381   |
| H12 | H14 | 0.0089449084376  |
| H13 | H14 | 3.5847821361e-05 |
| N1  | H15 | 0.8331756665     |
| C2  | H15 | 0.01890008957    |
| C3  | H15 | 0.0065106977012  |
| O4  | H15 | 0.0020470432505  |
| C5  | H15 | 0.00028576661231 |
| C6  | H15 | 0.0014414675167  |
| O7  | H15 | 0.013561577711   |
| H8  | H15 | 4.6301421414e-05 |
| H9  | H15 | 3.379718142e-05  |
| N1  | H15 | 3.7447272127e-05 |
| H11 | H15 | 0.00022125753394 |
| H12 | H15 | 0.0029051608086  |
| H13 | H15 | 0.000354953336   |
| H14 | H15 | 0.01596920699    |
| N1  | O16 | 0.082306596963   |
| C2  | O16 | 0.084887040213   |
| C3  | O16 | 0.73701863279    |
| O4  | O16 | 0.27862687057    |
| C5  | O16 | 0.00054850926546 |
| C6  | O16 | 0.0079807908718  |
| O7  | O16 | 0.0026252394495  |
| H8  | O16 | 0.0001333629862  |
| H9  | O16 | 0.00011920802162 |
| N1  | O16 | 0.00079764834702 |
| H11 | O16 | 0.00067765381396 |
| H12 | O16 | 0.0092616912885  |
| H13 | O16 | 0.00040006993735 |
| H14 | O16 | 0.0019395450308  |
| H15 | O16 | 0.0029501923651  |
| N1  | H17 | 0.044880216657   |
| C2  | H17 | 0.0023355747807  |
| C3  | H17 | 0.0062054444614  |
| O4  | H17 | 0.0077515833919  |
| C5  | H17 | 7.6543090042e-05 |
| C6  | H17 | 0.00061516390292 |

|     |     |                  |
|-----|-----|------------------|
| O7  | H17 | 0.00024589355862 |
| H8  | H17 | 1.9750025642e-05 |
| H9  | H17 | 5.5147299355e-06 |
| N1  | H17 | 4.6040493441e-05 |
| H11 | H17 | 3.1192021224e-05 |
| H12 | H17 | 0.00013826902366 |
| H13 | H17 | 7.3372930023e-06 |
| H14 | H17 | 0.00069552465645 |
| H15 | H17 | 0.00089692896093 |
| O16 | H17 | 0.47951459503    |

## PROLINE

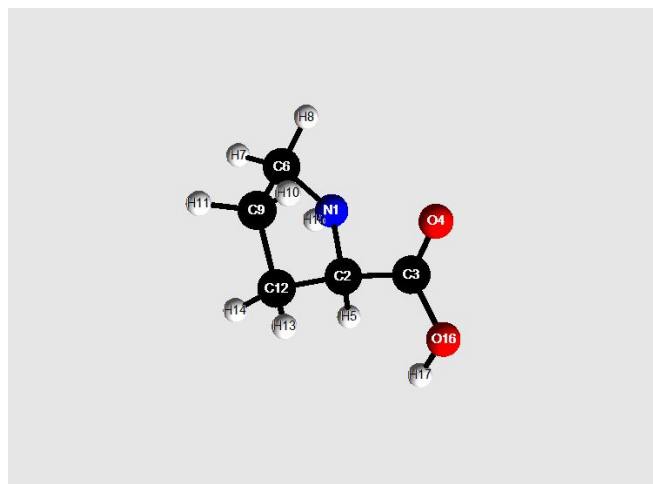

## HARTREE-FOCK

| Atom A | Atom B | Delocalization index |
|--------|--------|----------------------|
| N1     | C2     | 0.96732662206        |
| N1     | C3     | 0.057574921679       |
| C2     | C3     | 0.85929833637        |
| N1     | O4     | 0.046282962302       |
| C2     | O4     | 0.090859415584       |
| C3     | O4     | 1.1318284398         |
| N1     | H5     | 0.058262379556       |
| C2     | H5     | 0.920972491          |
| C3     | H5     | 0.038349051241       |
| O4     | H5     | 0.012340792328       |
| N1     | C6     | 0.92590152168        |
| C2     | C6     | 0.029491819559       |
| C3     | C6     | 0.0017904054225      |
| O4     | C6     | 0.0058157487123      |
| H5     | C6     | 0.0067513778317      |
| N1     | H7     | 0.066112658631       |
| C2     | H7     | 0.0043374452885      |
| C3     | H7     | 0.00082008148155     |
| O4     | H7     | 0.00077148536535     |
| H5     | H7     | 0.00055616575058     |
| C6     | H7     | 0.93983459789        |
| N1     | H8     | 0.061258731872       |
| C2     | H8     | 0.0040334658355      |
| C3     | H8     | 0.00030796114752     |
| O4     | H8     | 0.0038697899915      |
| H5     | H8     | 0.0012111463339      |
| C6     | H8     | 0.93455517324        |
| H7     | H8     | 0.040666726902       |
| N1     | C9     | 0.06601795356        |
| C2     | C9     | 0.044690723871       |

|     |     |                  |
|-----|-----|------------------|
| C3  | C9  | 0.0040177133143  |
| O4  | C9  | 0.01200069176    |
| H5  | C9  | 0.0078539580473  |
| C6  | C9  | 0.93814904832    |
| H7  | C9  | 0.040395404046   |
| H8  | C9  | 0.039055007695   |
| N1  | N1  | 0.0034991384177  |
| C2  | N1  | 0.0025537779986  |
| C3  | N1  | 0.0016903802581  |
| O4  | N1  | 0.016836067315   |
| H5  | N1  | 0.00041887263165 |
| C6  | N1  | 0.038570918438   |
| H7  | N1  | 0.0072912997259  |
| H8  | N1  | 0.0074812209577  |
| C9  | N1  | 0.9481455039     |
| N1  | H11 | 0.0086338430775  |
| C2  | H11 | 0.0088024029487  |
| C3  | H11 | 0.00088853723511 |
| O4  | H11 | 0.0014453496053  |
| H5  | H11 | 0.0014038674307  |
| C6  | H11 | 0.039474790038   |
| H7  | H11 | 0.0074777124597  |
| H8  | H11 | 0.0022539540291  |
| C9  | H11 | 0.96083066548    |
| N1  | H11 | 0.03994289037    |
| N1  | C12 | 0.074036924521   |
| C2  | C12 | 0.92138213652    |
| C3  | C12 | 0.045745720392   |
| O4  | C12 | 0.015525026566   |
| H5  | C12 | 0.036537287749   |
| C6  | C12 | 0.044881781231   |
| H7  | C12 | 0.0033009820559  |
| H8  | C12 | 0.0065942497727  |
| C9  | C12 | 0.9615365548     |
| N1  | C12 | 0.041274295195   |
| H11 | C12 | 0.041829230189   |
| N1  | H13 | 0.01264354716    |
| C2  | H13 | 0.037960614655   |
| C3  | H13 | 0.0063211091974  |
| O4  | H13 | 0.0023624855626  |
| H5  | H13 | 0.001345345966   |
| C6  | H13 | 0.00839254197    |
| H7  | H13 | 0.00066858520613 |
| H8  | H13 | 0.00099889427437 |
| C9  | H13 | 0.038171041985   |
| N1  | H13 | 0.00548253226    |
| H11 | H13 | 0.0014797966706  |
| C12 | H13 | 0.95581292945    |

|     |     |                  |
|-----|-----|------------------|
| N1  | H14 | 0.0079460841716  |
| C2  | H14 | 0.042257747572   |
| C3  | H14 | 0.0082552712213  |
| O4  | H14 | 0.0031003165414  |
| H5  | H14 | 0.0067652987984  |
| C6  | H14 | 0.0032625419816  |
| H7  | H14 | 0.00088429962333 |
| H8  | H14 | 0.00054529496361 |
| C9  | H14 | 0.040366759563   |
| N1  | H14 | 0.0096509396571  |
| H11 | H14 | 0.0061577368302  |
| C12 | H14 | 0.95289717807    |
| H13 | H14 | 0.040928388975   |
| N1  | H15 | 0.8657123908     |
| C2  | H15 | 0.022360075817   |
| C3  | H15 | 0.0051287014417  |
| O4  | H15 | 0.001676605906   |
| H5  | H15 | 0.0049729453398  |
| C6  | H15 | 0.020855500439   |
| H7  | H15 | 0.005765203356   |
| H8  | H15 | 0.0033790189919  |
| C9  | H15 | 0.0034545080284  |
| N1  | H15 | 0.00036248169739 |
| H11 | H15 | 0.0005879899424  |
| C12 | H15 | 0.00224285958    |
| H13 | H15 | 0.00039694335425 |
| H14 | H15 | 0.00051189031256 |
| N1  | O16 | 0.011730504795   |
| C2  | O16 | 0.089793425304   |
| C3  | O16 | 0.71399346289    |
| O4  | O16 | 0.27276294711    |
| H5  | O16 | 0.021895607411   |
| C6  | O16 | 0.0010205625166  |
| H7  | O16 | 0.00034463004972 |
| H8  | O16 | 0.0002352691269  |
| C9  | O16 | 0.0015101284968  |
| N1  | O16 | 0.00046765333285 |
| H11 | O16 | 0.00035278258665 |
| C12 | O16 | 0.013126021847   |
| H13 | O16 | 0.0094510736684  |
| H14 | O16 | 0.0013746373817  |
| H15 | O16 | 0.0011234245263  |
| N1  | H17 | 0.00081379941391 |
| C2  | H17 | 0.0050679782183  |
| C3  | H17 | 0.0073982127427  |
| O4  | H17 | 0.010491824      |
| H5  | H17 | 0.0054504425861  |
| C6  | H17 | 0.00013028268674 |

|     |     |                  |
|-----|-----|------------------|
| H7  | H17 | 1.3170765172e-05 |
| H8  | H17 | 5.4983098478e-05 |
| C9  | H17 | 0.00011048178987 |
| N1  | H17 | 1.885499643e-05  |
| H11 | H17 | 1.0802267018e-05 |
| C12 | H17 | 0.00045040624713 |
| H13 | H17 | 0.00031362603541 |
| H14 | H17 | 7.1640059056e-05 |
| H15 | H17 | 5.9851694331e-05 |
| O16 | H17 | 0.57129812634    |

## SERINE

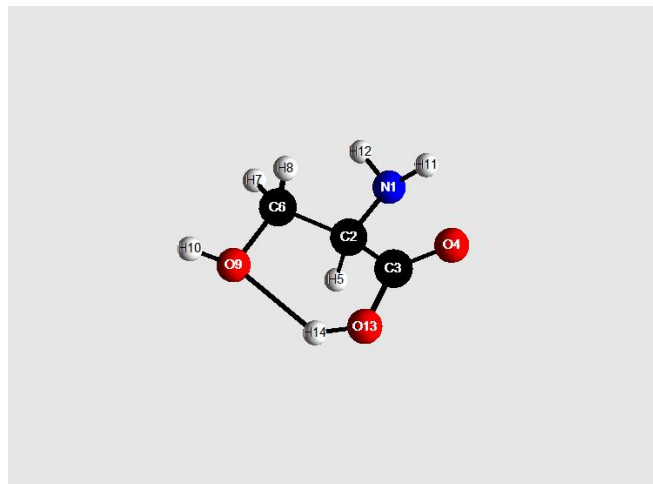

### HARTREE-FOCK

| Atom A | Atom B | Delocalization index |
|--------|--------|----------------------|
| N1     | C2     | 0.98159820761        |
| N1     | C3     | 0.050767957044       |
| C2     | C3     | 0.85721455438        |
| N1     | O4     | 0.059633654627       |
| C2     | O4     | 0.09690308221        |
| C3     | O4     | 1.1124387276         |
| N1     | H5     | 0.061512803799       |
| C2     | H5     | 0.90515591983        |
| C3     | H5     | 0.039632944719       |
| O4     | H5     | 0.012457719036       |
| N1     | C6     | 0.074703174937       |
| C2     | C6     | 0.90503603985        |
| C3     | C6     | 0.041155994226       |
| O4     | C6     | 0.013425442525       |
| H5     | C6     | 0.037166624164       |
| N1     | H7     | 0.015243691906       |
| C2     | H7     | 0.036802105723       |
| C3     | H7     | 0.0079199113433      |
| O4     | H7     | 0.0028940711008      |
| H5     | H7     | 0.0030013708543      |
| C6     | H7     | 0.91507538762        |
| N1     | H8     | 0.010150474036       |
| C2     | H8     | 0.036683459525       |
| C3     | H8     | 0.0061518747195      |
| O4     | H8     | 0.0037910851344      |
| H5     | H8     | 0.0093772653836      |
| C6     | H8     | 0.91867169934        |
| H7     | H8     | 0.038495905552       |
| N1     | O9     | 0.014883141663       |
| C2     | O9     | 0.074269597107       |

|     |     |                  |
|-----|-----|------------------|
| C3  | O9  | 0.0053805196045  |
| O4  | O9  | 0.0024993575158  |
| H5  | O9  | 0.017093160142   |
| C6  | O9  | 0.79747825879    |
| H7  | O9  | 0.078353902704   |
| H8  | O9  | 0.077808801349   |
| N1  | N1  | 0.0013994033324  |
| C2  | N1  | 0.0054675638468  |
| C3  | N1  | 0.00014649600832 |
| O4  | N1  | 0.00010679673528 |
| H5  | N1  | 0.00051324586409 |
| C6  | N1  | 0.010069088978   |
| H7  | N1  | 0.00062279856154 |
| H8  | N1  | 0.0012060051861  |
| O9  | N1  | 0.58726159693    |
| N1  | H11 | 0.80592747007    |
| C2  | H11 | 0.019255241398   |
| C3  | H11 | 0.0042342698282  |
| O4  | H11 | 0.031705239216   |
| H5  | H11 | 0.0061888877399  |
| C6  | H11 | 0.0018225511386  |
| H7  | H11 | 0.00044315720272 |
| H8  | H11 | 0.00034963620422 |
| O9  | H11 | 0.00069757514208 |
| N1  | H11 | 7.8152728059e-05 |
| N1  | H12 | 0.87266099356    |
| C2  | H12 | 0.021478610984   |
| C3  | H12 | 0.0058880353365  |
| O4  | H12 | 0.0027092078536  |
| H5  | H12 | 0.0012962648175  |
| C6  | H12 | 0.0087506185886  |
| H7  | H12 | 0.0072690752182  |
| H8  | H12 | 0.00067490977523 |
| O9  | H12 | 0.0012441760263  |
| N1  | H12 | 4.5473435339e-05 |
| H11 | H12 | 0.015144883556   |
| N1  | O13 | 0.011958293145   |
| C2  | O13 | 0.088647649759   |
| C3  | O13 | 0.73123270621    |
| O4  | O13 | 0.27721886533    |
| H5  | O13 | 0.0151099778     |
| C6  | O13 | 0.0099479331925  |
| H7  | O13 | 0.0012612683253  |
| H8  | O13 | 0.0018470850833  |
| O9  | O13 | 0.057453635233   |
| N1  | O13 | 0.00089999142781 |
| H11 | O13 | 0.0010798176777  |
| H12 | O13 | 0.0017475418325  |



|     |     |                  |
|-----|-----|------------------|
| N1  | H14 | 0.00028372734336 |
| C2  | H14 | 0.0020210582886  |
| C3  | H14 | 0.0061188357591  |
| O4  | H14 | 0.0081487840272  |
| H5  | H14 | 0.00085783876641 |
| C6  | H14 | 0.00086998393995 |
| H7  | H14 | 0.00034837070366 |
| H8  | H14 | 9.5564741812e-05 |
| O9  | H14 | 0.035726059465   |
| N1  | H14 | 0.00065395532226 |
| H11 | H14 | 5.3101371214e-05 |
| H12 | H14 | 3.2640449648e-05 |
| O13 | H14 | 0.48677552515    |

## TYROSINE

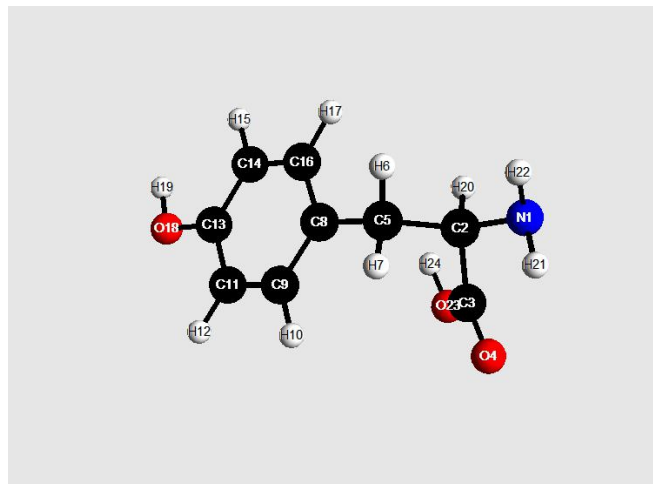

### HARTREE-FOCK

| Atom A | Atom B | Delocalization index |
|--------|--------|----------------------|
| N1     | C2     | 0.97604663953        |
| N1     | C3     | 0.057575596951       |
| C2     | C3     | 0.85404751903        |
| N1     | O4     | 0.05405312072        |
| C2     | O4     | 0.094786149704       |
| C3     | O4     | 1.107847341          |
| N1     | C5     | 0.075605370251       |
| C2     | C5     | 0.92109697576        |
| C3     | C5     | 0.043033137291       |
| O4     | C5     | 0.018683161309       |
| N1     | H6     | 0.015479594941       |
| C2     | H6     | 0.040086647375       |
| C3     | H6     | 0.0084539185962      |
| O4     | H6     | 0.0032295788078      |
| C5     | H6     | 0.93971218569        |
| N1     | H7     | 0.01122866314        |
| C2     | H7     | 0.037682008392       |
| C3     | H7     | 0.0049199514866      |
| O4     | H7     | 0.010107322073       |
| C5     | H7     | 0.93877711558        |
| H6     | H7     | 0.03913836121        |
| N1     | C8     | 0.013197298434       |
| C2     | C8     | 0.042556589746       |
| C3     | C8     | 0.0052603850695      |
| O4     | C8     | 0.0015929331631      |
| C5     | C8     | 0.9910079647         |
| H6     | C8     | 0.042301003535       |
| H7     | C8     | 0.039587795643       |
| N1     | C9     | 0.0018501615013      |
| C2     | C9     | 0.0083952372462      |

|     |     |                  |
|-----|-----|------------------|
| C3  | C9  | 0.0022666100753  |
| O4  | C9  | 0.002196107679   |
| C5  | C9  | 0.048288552199   |
| H6  | C9  | 0.0083704577388  |
| H7  | C9  | 0.011520500181   |
| C8  | C9  | 1.3467379567     |
| N1  | N1  | 0.00015567489211 |
| C2  | N1  | 0.00057841249805 |
| C3  | N1  | 0.0008717013073  |
| O4  | N1  | 0.0033487852355  |
| C5  | N1  | 0.0093280759576  |
| H6  | N1  | 0.00075690070358 |
| H7  | N1  | 0.0076571305851  |
| C8  | N1  | 0.044694683093   |
| C9  | N1  | 0.96376783681    |
| N1  | C11 | 0.00037088604325 |
| C2  | C11 | 0.001174548738   |
| C3  | C11 | 0.00021057597182 |
| O4  | C11 | 0.00027991457731 |
| C5  | C11 | 0.0076171674863  |
| H6  | C11 | 0.0014786891948  |
| H7  | C11 | 0.0008722808538  |
| C8  | C11 | 0.06901064629    |
| C9  | C11 | 1.4017996062     |
| N1  | C11 | 0.048241204586   |
| N1  | H12 | 5.672815123e-05  |
| C2  | H12 | 8.4439061291e-05 |
| C3  | H12 | 7.5840296965e-06 |
| O4  | H12 | 1.6060991251e-05 |
| C5  | H12 | 0.0010446805327  |
| H6  | H12 | 0.00020472934491 |
| H7  | H12 | 5.9882005846e-05 |
| C8  | H12 | 0.0081069342069  |
| C9  | H12 | 0.046157195688   |
| N1  | H12 | 0.0058249886208  |
| C11 | H12 | 0.96670055875    |
| N1  | C13 | 0.0006427834532  |
| C2  | C13 | 0.0031583167065  |
| C3  | C13 | 0.0002457314754  |
| O4  | C13 | 0.00012688890251 |
| C5  | C13 | 0.0042816672411  |
| H6  | C13 | 0.0017361003885  |
| H7  | C13 | 0.00077173663228 |
| C8  | C13 | 0.081445746751   |
| C9  | C13 | 0.076207911182   |
| N1  | C13 | 0.0081402049026  |
| C11 | C13 | 1.3004748105     |
| H12 | C13 | 0.045849397649   |

|     |     |                  |
|-----|-----|------------------|
| N1  | C14 | 0.00032418810791 |
| C2  | C14 | 0.0011812395357  |
| C3  | C14 | 0.00028748068473 |
| O4  | C14 | 0.00018723970528 |
| C5  | C14 | 0.008093189123   |
| H6  | C14 | 0.0010029579515  |
| H7  | C14 | 0.0014612753833  |
| C8  | C14 | 0.070590638141   |
| C9  | C14 | 0.093754027117   |
| N1  | C14 | 0.0054270111148  |
| C11 | C14 | 0.06580185439    |
| H12 | C14 | 0.0067448910516  |
| C13 | C14 | 1.3232580292     |
| N1  | H15 | 4.7117816583e-05 |
| C2  | H15 | 6.988575361e-05  |
| C3  | H15 | 1.6679259492e-05 |
| O4  | H15 | 1.3259292445e-05 |
| C5  | H15 | 0.0011178407118  |
| H6  | H15 | 5.8501816278e-05 |
| H7  | H15 | 0.00024769483791 |
| C8  | H15 | 0.008499838247   |
| C9  | H15 | 0.0062384011505  |
| N1  | H15 | 0.00034948381475 |
| C11 | H15 | 0.0071823901994  |
| H12 | H15 | 0.0016890111104  |
| C13 | H15 | 0.04947656217    |
| C14 | H15 | 0.97434928391    |
| N1  | C16 | 0.0020978842062  |
| C2  | C16 | 0.011317714352   |
| C3  | C16 | 0.00077320199663 |
| O4  | C16 | 0.0004986475344  |
| C5  | C16 | 0.049601179036   |
| H6  | C16 | 0.011812154919   |
| H7  | C16 | 0.0075694107836  |
| C8  | C16 | 1.3710807008     |
| C9  | C16 | 0.076541185824   |
| N1  | C16 | 0.0083247366739  |
| C11 | C16 | 0.096421035448   |
| H12 | C16 | 0.0056344112215  |
| C13 | C16 | 0.073032281808   |
| C14 | C16 | 1.3811992907     |
| H15 | C16 | 0.048313848274   |
| N1  | H17 | 0.00036332614654 |
| C2  | H17 | 0.0020556271898  |
| C3  | H17 | 0.00018768038235 |
| O4  | H17 | 0.00015933507028 |
| C5  | H17 | 0.0093267284323  |
| H6  | H17 | 0.0061371651687  |

|     |     |                  |
|-----|-----|------------------|
| H7  | H17 | 0.00077951489733 |
| C8  | H17 | 0.046397510984   |
| C9  | H17 | 0.0086501606191  |
| N1  | H17 | 0.0016472651842  |
| C11 | H17 | 0.0060400656427  |
| H12 | H17 | 0.00033562291316 |
| C13 | H17 | 0.0081822579052  |
| C14 | H17 | 0.049676312971   |
| H15 | H17 | 0.0061100491892  |
| C16 | H17 | 0.96935417898    |
| N1  | O18 | 0.00017386162663 |
| C2  | O18 | 0.00081361685939 |
| C3  | O18 | 6.158372631e-05  |
| O4  | O18 | 3.3943992023e-05 |
| C5  | O18 | 0.0011423921832  |
| H6  | O18 | 0.00046783787554 |
| H7  | O18 | 0.0002061063901  |
| C8  | O18 | 0.018269342951   |
| C9  | O18 | 0.013332524832   |
| N1  | O18 | 0.0013397688014  |
| C11 | O18 | 0.10855115733    |
| H12 | O18 | 0.015178604695   |
| C13 | O18 | 0.8313781423     |
| C14 | O18 | 0.11546805189    |
| H15 | O18 | 0.015634166662   |
| C16 | O18 | 0.014592315259   |
| H17 | O18 | 0.0016926444799  |
| N1  | H19 | 3.3187082919e-06 |
| C2  | H19 | 7.8027539575e-06 |
| C3  | H19 | 7.9773178436e-07 |
| O4  | H19 | 1.8625554833e-06 |
| C5  | H19 | 4.3603726545e-05 |
| H6  | H19 | 5.0464371845e-06 |
| H7  | H19 | 8.9443614946e-06 |
| C8  | H19 | 0.00024275170233 |
| C9  | H19 | 0.00093838470152 |
| N1  | H19 | 0.00019034761997 |
| C11 | H19 | 0.0055668465613  |
| H12 | H19 | 0.00034786093365 |
| C13 | H19 | 0.01014781574    |
| C14 | H19 | 0.0048250502504  |
| H15 | H19 | 0.003753145869   |
| C16 | H19 | 0.00039602451629 |
| H17 | H19 | 4.3523429047e-05 |
| O18 | H19 | 0.5772209449     |
| N1  | C2  | 0.062068487737   |
| C2  | C2  | 0.91009023749    |
| C3  | C2  | 0.035575336901   |

|     |     |                  |
|-----|-----|------------------|
| O4  | C2  | 0.011255499195   |
| C5  | C2  | 0.038623209317   |
| H6  | C2  | 0.0032444462648  |
| H7  | C2  | 0.0096412762681  |
| C8  | C2  | 0.0087003940187  |
| C9  | C2  | 0.00068351009    |
| N1  | C2  | 0.00012088390122 |
| C11 | C2  | 0.00076943373979 |
| H12 | C2  | 4.1100595405e-05 |
| C13 | C2  | 0.00048193722263 |
| C14 | C2  | 0.00080143176946 |
| H15 | C2  | 2.8210863671e-05 |
| C16 | C2  | 0.0081724160072  |
| H17 | C2  | 0.0035224523155  |
| O18 | C2  | 0.00012065796931 |
| H19 | C2  | 1.3550777638e-06 |
| N1  | H21 | 0.82497776122    |
| C2  | H21 | 0.019810164633   |
| C3  | H21 | 0.0032459916234  |
| O4  | H21 | 0.024336699705   |
| C5  | H21 | 0.0021770281028  |
| H6  | H21 | 0.00031915532893 |
| H7  | H21 | 0.0012215310148  |
| C8  | H21 | 0.00033552149446 |
| C9  | H21 | 5.6433945932e-05 |
| N1  | H21 | 7.23631489e-06   |
| C11 | H21 | 2.1390506602e-05 |
| H12 | H21 | 2.054972331e-06  |
| C13 | H21 | 2.19431781e-05   |
| C14 | H21 | 1.9886798421e-05 |
| H15 | H21 | 1.8173706439e-06 |
| C16 | H21 | 0.00014989807905 |
| H17 | H21 | 5.3296825535e-05 |
| O18 | H21 | 6.601974648e-06  |
| H19 | H21 | 1.1851961629e-07 |
| C2  | H21 | 0.0082167603202  |
| N1  | H22 | 0.87495547178    |
| C2  | H22 | 0.021432600818   |
| C3  | H22 | 0.0072643186407  |
| O4  | H22 | 0.0030553085338  |
| C5  | H22 | 0.0071814761084  |
| H6  | H22 | 0.0060629017339  |
| H7  | H22 | 0.0004445179701  |
| C8  | H22 | 0.00057049618672 |
| C9  | H22 | 0.00019620051166 |
| N1  | H22 | 9.3368403954e-06 |
| C11 | H22 | 3.7111071446e-05 |
| H12 | H22 | 5.1232764071e-06 |

|     |     |                  |
|-----|-----|------------------|
| C13 | H22 | 7.3358297594e-05 |
| C14 | H22 | 2.0585560098e-05 |
| H15 | H22 | 1.4543990029e-06 |
| C16 | H22 | 0.00015156221644 |
| H17 | H22 | 2.2824557196e-05 |
| O18 | H22 | 2.4078324609e-05 |
| H19 | H22 | 2.7085927127e-07 |
| C2  | H22 | 0.0010741940723  |
| H21 | H22 | 0.015780265654   |
| N1  | O23 | 0.010600851516   |
| C2  | O23 | 0.08762758691    |
| C3  | O23 | 0.72289796264    |
| O4  | O23 | 0.27719296678    |
| C5  | O23 | 0.0083318398351  |
| H6  | O23 | 0.0013363962708  |
| H7  | O23 | 0.00083215327417 |
| C8  | O23 | 0.019879361914   |
| C9  | O23 | 0.016937542455   |
| N1  | O23 | 0.0017450604283  |
| C11 | O23 | 0.002899756959   |
| H12 | O23 | 8.9838480618e-05 |
| C13 | O23 | 0.0010295065668  |
| C14 | O23 | 0.0013504590479  |
| H15 | O23 | 7.4156528854e-05 |
| C16 | O23 | 0.0039060616737  |
| H17 | O23 | 0.00012414251556 |
| O18 | O23 | 0.0002365591795  |
| H19 | O23 | 3.2244603445e-06 |
| C2  | O23 | 0.0211111453482  |
| H21 | O23 | 0.00091937271825 |
| H22 | O23 | 0.0017556616595  |
| N1  | H24 | 0.00063428398232 |
| C2  | H24 | 0.0041361007787  |
| C3  | H24 | 0.0069763792307  |
| O4  | H24 | 0.0098995621012  |
| C5  | H24 | 0.00036390421628 |
| H6  | H24 | 3.4628636041e-05 |
| H7  | H24 | 0.00013202257058 |
| C8  | H24 | 0.003740348239   |
| C9  | H24 | 0.00078154554385 |
| N1  | H24 | 2.2619376137e-05 |
| C11 | H24 | 0.00027936860935 |
| H12 | H24 | 1.3482616987e-05 |
| C13 | H24 | 0.00023566783538 |
| C14 | H24 | 0.00045952288062 |
| H15 | H24 | 1.2105298127e-05 |
| C16 | H24 | 0.0028109238481  |
| H17 | H24 | 0.00010989069564 |

|     |     |                  |
|-----|-----|------------------|
| O18 | H24 | 5.3723025678e-05 |
| H19 | H24 | 4.8802635959e-07 |
| C2  | H24 | 0.0045221293914  |
| H21 | H24 | 0.00013000590273 |
| H22 | H24 | 3.5721932632e-05 |
| O23 | H24 | 0.5484319747     |



# AROMATICS

## BENZENE

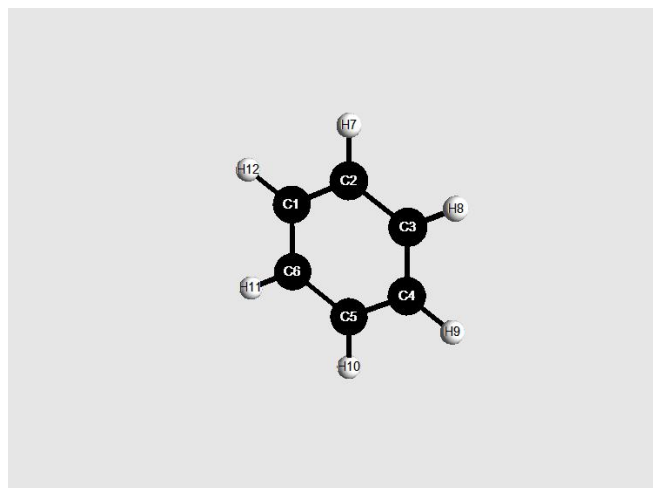

### HARTREE-FOCK

| Atom A | Atom B | Delocalization index |
|--------|--------|----------------------|
| C1     | C2     | 1.3873464851         |
| C1     | C3     | 0.074450464492       |
| C2     | C3     | 1.3873114675         |
| C1     | C4     | 0.099040563284       |
| C2     | C4     | 0.074447107776       |
| C3     | C4     | 1.3872776589         |
| C1     | C5     | 0.074447007146       |
| C2     | C5     | 0.099058091157       |
| C3     | C5     | 0.07446365239        |
| C4     | C5     | 1.3873454024         |
| C1     | C6     | 1.3872773485         |
| C2     | C6     | 0.074463896514       |
| C3     | C6     | 0.099066249145       |
| C4     | C6     | 0.07445042677        |
| C5     | C6     | 1.3873100803         |
| C1     | H7     | 0.049328668819       |
| C2     | H7     | 0.9771674034         |
| C3     | H7     | 0.049333529769       |
| C4     | H7     | 0.0086524673604      |
| C5     | H7     | 0.0063022175043      |
| C6     | H7     | 0.0086542528228      |
| C1     | H8     | 0.0086529335696      |
| C2     | H8     | 0.049322769992       |
| C3     | H8     | 0.97705319807        |
| C4     | H8     | 0.049343985334       |
| C5     | H8     | 0.0086527399843      |
| C6     | H8     | 0.0063029610675      |
| H7     | H8     | 0.0056650295194      |

|     |     |                  |
|-----|-----|------------------|
| C1  | H9  | 0.0063018920447  |
| C2  | H9  | 0.0086532689307  |
| C3  | H9  | 0.049317981127   |
| C4  | H9  | 0.97713037641    |
| C5  | H9  | 0.049356087369   |
| C6  | H9  | 0.0086534376008  |
| H7  | H9  | 0.001383904079   |
| H8  | H9  | 0.0056648995818  |
| C1  | C1  | 0.0086524600502  |
| C2  | C1  | 0.0063022505187  |
| C3  | C1  | 0.0086542382062  |
| C4  | C1  | 0.049328683037   |
| C5  | C1  | 0.97716582566    |
| C6  | C1  | 0.049333584917   |
| H7  | C1  | 0.00041977391189 |
| H8  | C1  | 0.0013839056142  |
| H9  | C1  | 0.005665013681   |
| C1  | H11 | 0.049343849217   |
| C2  | H11 | 0.0086527494309  |
| C3  | H11 | 0.0063029659855  |
| C4  | H11 | 0.0086529328096  |
| C5  | H11 | 0.049322795231   |
| C6  | H11 | 0.97705363552    |
| H7  | H11 | 0.0013839059409  |
| H8  | H11 | 0.00041977057456 |
| H9  | H11 | 0.0013838738189  |
| C1  | H11 | 0.005665036837   |
| C1  | H12 | 0.97713035931    |
| C2  | H12 | 0.049355955561   |
| C3  | H12 | 0.008653443408   |
| C4  | H12 | 0.0063018905361  |
| C5  | H12 | 0.0086532763821  |
| C6  | H12 | 0.049318065354   |
| H7  | H12 | 0.0056650103245  |
| H8  | H12 | 0.0013838750221  |
| H9  | H12 | 0.00041977302326 |
| C1  | H12 | 0.0013839038948  |
| H11 | H12 | 0.0056648985845  |

#### CCSD

| Atom A | Atom B | Delocalization index |
|--------|--------|----------------------|
| C1     | C2     | 1.1602004377         |
| C1     | C3     | 0.052044056355       |
| C2     | C3     | 1.1601974879         |
| C1     | C4     | 0.060360766218       |
| C2     | C4     | 0.052066717021       |
| C3     | C4     | 1.1601825998         |
| C1     | C5     | 0.052066724326       |

|    |     |                  |
|----|-----|------------------|
| C2 | C5  | 0.060367970543   |
| C3 | C5  | 0.052046361291   |
| C4 | C5  | 1.1602005738     |
| C1 | C6  | 1.1601826254     |
| C2 | C6  | 0.052046372999   |
| C3 | C6  | 0.060318481085   |
| C4 | C6  | 0.052044074597   |
| C5 | C6  | 1.1601976763     |
| C1 | H7  | 0.036960099321   |
| C2 | H7  | 0.84073335263    |
| C3 | H7  | 0.036973689113   |
| C4 | H7  | 0.0066819171184  |
| C5 | H7  | 0.003805238206   |
| C6 | H7  | 0.0066809424412  |
| C1 | H8  | 0.0066813718585  |
| C2 | H8  | 0.036942945097   |
| C3 | H8  | 0.84088485686    |
| C4 | H8  | 0.036942198792   |
| C5 | H8  | 0.0066817074726  |
| C6 | H8  | 0.003804261357   |
| H7 | H8  | 0.0047015334887  |
| C1 | H9  | 0.0038050150384  |
| C2 | H9  | 0.0066820180453  |
| C3 | H9  | 0.036972992339   |
| C4 | H9  | 0.84071858131    |
| C5 | H9  | 0.036960782363   |
| C6 | H9  | 0.006681004661   |
| H7 | H9  | 0.0012912379696  |
| H8 | H9  | 0.0047014818458  |
| C1 | C1  | 0.0066819128831  |
| C2 | C1  | 0.0038052365762  |
| C3 | C1  | 0.0066809386203  |
| C4 | C1  | 0.036960107144   |
| C5 | C1  | 0.84073394431    |
| C6 | C1  | 0.036973697381   |
| H7 | C1  | 0.00032983958153 |
| H8 | C1  | 0.0012912397326  |
| H9 | C1  | 0.0047015351376  |
| C1 | H11 | 0.036942186739   |
| C2 | H11 | 0.0066817036494  |
| C3 | H11 | 0.0038042614296  |
| C4 | H11 | 0.0066813726403  |
| C5 | H11 | 0.036943003923   |
| C6 | H11 | 0.84088538956    |
| H7 | H11 | 0.0012912397702  |
| H8 | H11 | 0.00032983998315 |
| H9 | H11 | 0.001291235919   |
| C1 | H11 | 0.0047015317108  |

|     |     |                  |
|-----|-----|------------------|
| C1  | H12 | 0.84071738893    |
| C2  | H12 | 0.036960704711   |
| C3  | H12 | 0.0066810063453  |
| C4  | H12 | 0.0038050106147  |
| C5  | H12 | 0.006682021773   |
| C6  | H12 | 0.036972994092   |
| H7  | H12 | 0.004701532391   |
| H8  | H12 | 0.001291236519   |
| H9  | H12 | 0.00032983863757 |
| C1  | H12 | 0.0012912370379  |
| H11 | H12 | 0.0047014823327  |

## ANISOLE

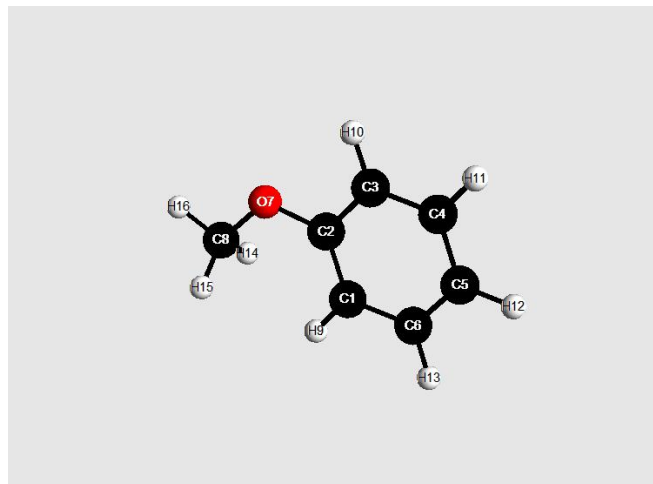

### HARTREE-FOCK

| Atom A | Atom B | Delocalization index |
|--------|--------|----------------------|
| C1     | C2     | 1.3344407067         |
| C1     | C3     | 0.064986232853       |
| C2     | C3     | 1.2766672735         |
| C1     | C4     | 0.092704391648       |
| C2     | C4     | 0.074982903821       |
| C3     | C4     | 1.424880465          |
| C1     | C5     | 0.072716561397       |
| C2     | C5     | 0.08479454942        |
| C3     | C5     | 0.071972170998       |
| C4     | C5     | 1.354456193          |
| C1     | C6     | 1.3598489292         |
| C2     | C6     | 0.073923544139       |
| C3     | C6     | 0.097997105986       |
| C4     | C6     | 0.077938631745       |
| C5     | C6     | 1.4161423166         |
| C1     | O7     | 0.10618022409        |
| C2     | O7     | 0.82405308409        |
| C3     | O7     | 0.10912456723        |
| C4     | O7     | 0.013155421012       |
| C5     | O7     | 0.01868509282        |
| C6     | O7     | 0.013238037412       |
| C1     | C8     | 0.016881071237       |
| C2     | C8     | 0.020061239542       |
| C3     | C8     | 0.0068301853186      |
| C4     | C8     | 0.0015719385682      |
| C5     | C8     | 0.00080780997126     |
| C6     | C8     | 0.0014780165436      |
| O7     | C8     | 0.78787869713        |
| C1     | H9     | 0.96570478867        |
| C2     | H9     | 0.048257524193       |

|     |     |                  |
|-----|-----|------------------|
| C3  | H9  | 0.0070505620382  |
| C4  | H9  | 0.0057956090311  |
| C5  | H9  | 0.0081469233452  |
| C6  | H9  | 0.046190813048   |
| O7  | H9  | 0.0089757480605  |
| C8  | H9  | 0.017727128785   |
| C1  | C1  | 0.0066536563208  |
| C2  | C1  | 0.0454205585     |
| C3  | C1  | 0.96818504512    |
| C4  | C1  | 0.047637198323   |
| C5  | C1  | 0.008453101173   |
| C6  | C1  | 0.0059495609508  |
| O7  | C1  | 0.017502606637   |
| C8  | C1  | 0.00055268588225 |
| H9  | C1  | 0.001644853845   |
| C1  | H11 | 0.005883710492   |
| C2  | H11 | 0.0085611086935  |
| C3  | H11 | 0.050870584903   |
| C4  | H11 | 0.97507604521    |
| C5  | H11 | 0.047076205566   |
| C6  | H11 | 0.0086357509506  |
| O7  | H11 | 0.0013640365953  |
| C8  | H11 | 0.00024134140412 |
| H9  | H11 | 0.00035804912079 |
| C1  | H11 | 0.0059395364031  |
| C1  | H12 | 0.0090968342521  |
| C2  | H12 | 0.0056612404353  |
| C3  | H12 | 0.0086714574328  |
| C4  | H12 | 0.048611213783   |
| C5  | H12 | 0.98014162759    |
| C6  | H12 | 0.051337755038   |
| O7  | H12 | 0.0014737261465  |
| C8  | H12 | 0.00010670743672 |
| H9  | H12 | 0.0012199410804  |
| C1  | H12 | 0.0012955117318  |
| H11 | H12 | 0.0054251422354  |
| C1  | H13 | 0.048827104376   |
| C2  | H13 | 0.0083007711783  |
| C3  | H13 | 0.0063154374894  |
| C4  | H13 | 0.0089733356647  |
| C5  | H13 | 0.049658160969   |
| C6  | H13 | 0.97524615658    |
| O7  | H13 | 0.0017984598097  |
| C8  | H13 | 5.9537471347e-05 |
| H9  | H13 | 0.0059385351386  |
| C1  | H13 | 0.00036854310828 |
| H11 | H13 | 0.0015012385819  |
| H12 | H13 | 0.0057611690254  |

|     |     |                  |
|-----|-----|------------------|
| C1  | H14 | 0.011327760143   |
| C2  | H14 | 0.0045368788578  |
| C3  | H14 | 0.0010960077182  |
| C4  | H14 | 0.00061465936351 |
| C5  | H14 | 0.00095623358447 |
| C6  | H14 | 0.0010415679111  |
| O7  | H14 | 0.076759794238   |
| C8  | H14 | 0.92319641147    |
| H9  | H14 | 0.010604374697   |
| C1  | H14 | 0.00013354049382 |
| H11 | H14 | 3.6762883952e-05 |
| H12 | H14 | 9.0059203632e-05 |
| H13 | H14 | 4.5171513165e-05 |
| C1  | H15 | 0.011367223696   |
| C2  | H15 | 0.0045202053658  |
| C3  | H15 | 0.0010963305001  |
| C4  | H15 | 0.00061737359056 |
| C5  | H15 | 0.00095934401214 |
| C6  | H15 | 0.0010440881868  |
| O7  | H15 | 0.076738865879   |
| C8  | H15 | 0.92311841232    |
| H9  | H15 | 0.010591522735   |
| C1  | H15 | 0.00013315056619 |
| H11 | H15 | 3.688178504e-05  |
| H12 | H15 | 9.0169773953e-05 |
| H13 | H15 | 4.520950653e-05  |
| H14 | H15 | 0.039984754572   |
| C1  | H16 | 0.001988251747   |
| C2  | H16 | 0.0067559253307  |
| C3  | H16 | 0.00087061746419 |
| C4  | H16 | 0.00025034324051 |
| C5  | H16 | 0.00012810164586 |
| C6  | H16 | 0.00016685020239 |
| O7  | H16 | 0.071643807156   |
| C8  | H16 | 0.93029181688    |
| H9  | H16 | 0.0021785266934  |
| C1  | H16 | 7.8406968918e-05 |
| H11 | H16 | 5.7174671199e-05 |
| H12 | H16 | 1.706968554e-05  |
| H13 | H16 | 2.9322298661e-05 |
| H14 | H16 | 0.037307630944   |
| H15 | H16 | 0.037298206687   |

## BENZENESULFONIC ACID

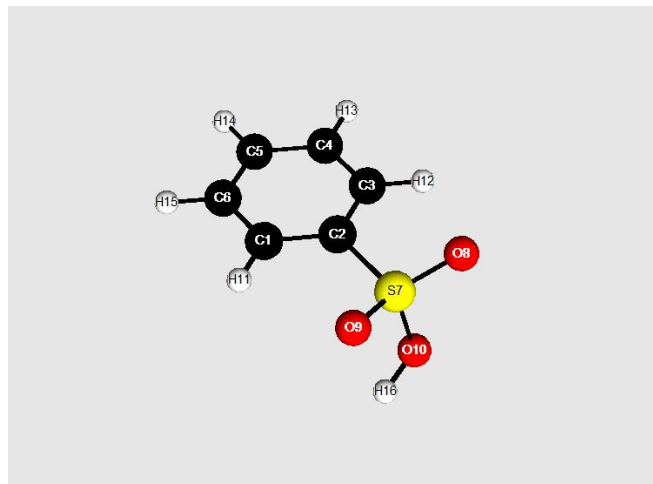

### HARTREE-FOCK

| Atom A | Atom B | Delocalization index |
|--------|--------|----------------------|
| C1     | C2     | 1.3723926659         |
| C1     | C3     | 0.065073290854       |
| C2     | C3     | 1.3561132999         |
| C1     | C4     | 0.095617604035       |
| C2     | C4     | 0.076624363484       |
| C3     | C4     | 1.3950489827         |
| C1     | C5     | 0.077107977745       |
| C2     | C5     | 0.09570329796        |
| C3     | C5     | 0.077058938045       |
| C4     | C5     | 1.376504239          |
| C1     | C6     | 1.3810577836         |
| C2     | C6     | 0.076254145258       |
| C3     | C6     | 0.096428500727       |
| C4     | C6     | 0.072463711203       |
| C5     | C6     | 1.3903320821         |
| C1     | S7     | 0.043925628322       |
| C2     | S7     | 0.85885438098        |
| C3     | S7     | 0.042878032096       |
| C4     | S7     | 0.0075051129278      |
| C5     | S7     | 0.0063816616439      |
| C6     | S7     | 0.0074417043237      |
| C1     | O8     | 0.012461153641       |
| C2     | O8     | 0.099767668245       |
| C3     | O8     | 0.028138740874       |
| C4     | O8     | 0.0025239650792      |
| C5     | O8     | 0.0028573697173      |
| C6     | O8     | 0.002984712967       |
| S7     | O8     | 0.95225652714        |
| C1     | O9     | 0.030606386128       |
| C2     | O9     | 0.096168115549       |



|     |     |                  |
|-----|-----|------------------|
| C3  | O9  | 0.011574004934   |
| C4  | O9  | 0.0030283925867  |
| C5  | O9  | 0.0022788110662  |
| C6  | O9  | 0.002565505921   |
| S7  | O9  | 0.93326800659    |
| O8  | O9  | 0.19990664621    |
| C1  | C1  | 0.012475128313   |
| C2  | C1  | 0.0874132792     |
| C3  | C1  | 0.013884784991   |
| C4  | C1  | 0.0019951015904  |
| C5  | C1  | 0.0041848249532  |
| C6  | C1  | 0.0020436188784  |
| S7  | C1  | 0.63783422797    |
| O8  | C1  | 0.18856860039    |
| O9  | C1  | 0.21060559508    |
| C1  | H11 | 0.95053803618    |
| C2  | H11 | 0.044931236721   |
| C3  | H11 | 0.0076031577133  |
| C4  | H11 | 0.00516693365    |
| C5  | H11 | 0.0076033840455  |
| C6  | H11 | 0.042545608693   |
| S7  | H11 | 0.0051291373684  |
| O8  | H11 | 0.0011326854454  |
| O9  | H11 | 0.028070038157   |
| C1  | H11 | 0.00099109949125 |
| C1  | H12 | 0.0075619365529  |
| C2  | H12 | 0.044338936038   |
| C3  | H12 | 0.95152660335    |
| C4  | H12 | 0.043005598108   |
| C5  | H12 | 0.0076882956898  |
| C6  | H12 | 0.0050768840161  |
| S7  | H12 | 0.0050959841027  |
| O8  | H12 | 0.022542318894   |
| O9  | H12 | 0.0010064099278  |
| C1  | H12 | 0.0016409116441  |
| H11 | H12 | 0.0013639991102  |
| C1  | H13 | 0.0055987709736  |
| C2  | H13 | 0.0087286115672  |
| C3  | H13 | 0.049018953773   |
| C4  | H13 | 0.97275179751    |
| C5  | H13 | 0.047546241532   |
| C6  | H13 | 0.0082483100085  |
| S7  | H13 | 0.0011491700145  |
| O8  | H13 | 0.0001270911016  |
| O9  | H13 | 0.0005790211682  |
| C1  | H13 | 0.00017762337643 |
| H11 | H13 | 0.0003139210452  |
| H12 | H13 | 0.0053290864004  |

|     |     |                  |
|-----|-----|------------------|
| C1  | H14 | 0.0084433737835  |
| C2  | H14 | 0.0055861878168  |
| C3  | H14 | 0.0083541354898  |
| C4  | H14 | 0.04716291302    |
| C5  | H14 | 0.97217655431    |
| C6  | H14 | 0.047723222998   |
| S7  | H14 | 0.00038564690716 |
| O8  | H14 | 0.00022684622261 |
| O9  | H14 | 0.00020685571785 |
| C1  | H14 | 0.00025147109581 |
| H11 | H14 | 0.0011661384929  |
| H12 | H14 | 0.0011720955922  |
| H13 | H14 | 0.0054017816169  |
| C1  | H15 | 0.048668968087   |
| C2  | H15 | 0.008709265396   |
| C3  | H15 | 0.0056940482315  |
| C4  | H15 | 0.0083273761137  |
| C5  | H15 | 0.048080883388   |
| C6  | H15 | 0.97313089484    |
| S7  | H15 | 0.0011595028329  |
| O8  | H15 | 0.00054324800943 |
| O9  | H15 | 0.00011691774503 |
| C1  | H15 | 0.0002200503876  |
| H11 | H15 | 0.0052715028006  |
| H12 | H15 | 0.00031205896928 |
| H13 | H15 | 0.0013017503244  |
| H14 | H15 | 0.0054658544725  |
| C1  | H16 | 0.00021831521932 |
| C2  | H16 | 0.0011643911886  |
| C3  | H16 | 0.00015645909266 |
| C4  | H16 | 3.776276617e-05  |
| C5  | H16 | 4.9470842549e-05 |
| C6  | H16 | 5.4420617575e-05 |
| S7  | H16 | 0.0067983408859  |
| O8  | H16 | 0.0082097720349  |
| O9  | H16 | 0.0064313315022  |
| C1  | H16 | 0.51956681444    |
| H11 | H16 | 3.3891608011e-05 |
| H12 | H16 | 1.9344525579e-05 |
| H13 | H16 | 2.9940740158e-06 |
| H14 | H16 | 3.07215165e-06   |
| H15 | H16 | 8.3958592011e-06 |

## BENZOIC ACID

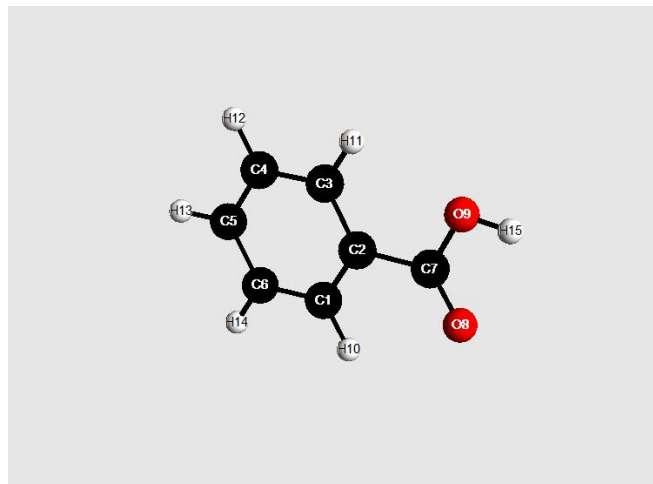

### HARTREE-FOCK

| Atom A | Atom B | Delocalization index |
|--------|--------|----------------------|
| C1     | C2     | 1.3451914085         |
| C1     | C3     | 0.06803600938        |
| C2     | C3     | 1.3571330719         |
| C1     | C4     | 0.095724886519       |
| C2     | C4     | 0.072658988883       |
| C3     | C4     | 1.389134767          |
| C1     | C5     | 0.07683891905        |
| C2     | C5     | 0.093322923453       |
| C3     | C5     | 0.076677652641       |
| C4     | C5     | 1.3869890281         |
| C1     | C6     | 1.3987064774         |
| C2     | C6     | 0.073255630231       |
| C3     | C6     | 0.095029856859       |
| C4     | C6     | 0.072053411865       |
| C5     | C6     | 1.3781354773         |
| C1     | C7     | 0.051444869061       |
| C2     | C7     | 0.93947798256        |
| C3     | C7     | 0.049508969174       |
| C4     | C7     | 0.0074917879398      |
| C5     | C7     | 0.0092960988989      |
| C6     | C7     | 0.00760696731        |
| C1     | O8     | 0.040556525281       |
| C2     | O8     | 0.10682406111        |
| C3     | O8     | 0.021202492168       |
| C4     | O8     | 0.0037517556653      |
| C5     | O8     | 0.0082669936954      |
| C6     | O8     | 0.0033955778359      |
| C7     | O8     | 1.0946941722         |
| C1     | O9     | 0.010728379756       |
| C2     | O9     | 0.08603269702        |

|     |     |                  |
|-----|-----|------------------|
| C3  | O9  | 0.03306831819    |
| C4  | O9  | 0.002744840277   |
| C5  | O9  | 0.0031645267529  |
| C6  | O9  | 0.0025096292051  |
| C7  | O9  | 0.71423173192    |
| O8  | O9  | 0.29166053471    |
| C1  | C1  | 0.95233286043    |
| C2  | C1  | 0.042050407032   |
| C3  | C1  | 0.0077407858933  |
| C4  | C1  | 0.0050997560861  |
| C5  | C1  | 0.0077718830738  |
| C6  | C1  | 0.043953018407   |
| C7  | C1  | 0.0051818789837  |
| O8  | C1  | 0.027451986163   |
| O9  | C1  | 0.0011348173395  |
| C1  | H11 | 0.0079295003888  |
| C2  | H11 | 0.04324633776    |
| C3  | H11 | 0.95624323745    |
| C4  | H11 | 0.044731034614   |
| C5  | H11 | 0.0078300145033  |
| C6  | H11 | 0.0053109672984  |
| C7  | H11 | 0.0043342560352  |
| O8  | H11 | 0.0013919314977  |
| O9  | H11 | 0.027567147391   |
| C1  | H11 | 0.0013925117707  |
| C1  | H12 | 0.0058825082483  |
| C2  | H12 | 0.0085676052087  |
| C3  | H12 | 0.049369449047   |
| C4  | H12 | 0.97571819562    |
| C5  | H12 | 0.04892296299    |
| C6  | H12 | 0.0084484119037  |
| C7  | H12 | 0.0010867323298  |
| O8  | H12 | 0.00054013803051 |
| O9  | H12 | 0.00010132436472 |
| C1  | H12 | 0.00032677831573 |
| H11 | H12 | 0.0054834760063  |
| C1  | H13 | 0.0084263070503  |
| C2  | H13 | 0.0056343087021  |
| C3  | H13 | 0.0084888017652  |
| C4  | H13 | 0.048130655534   |
| C5  | H13 | 0.97393160701    |
| C6  | H13 | 0.047660087963   |
| C7  | H13 | 0.00050563790164 |
| O8  | H13 | 0.0005888236708  |
| O9  | H13 | 0.00025024769491 |
| C1  | H13 | 0.0012138740705  |
| H11 | H13 | 0.0012099076513  |
| H12 | H13 | 0.0055451656178  |

|     |     |                  |
|-----|-----|------------------|
| C1  | H14 | 0.049483962508   |
| C2  | H14 | 0.0086155859301  |
| C3  | H14 | 0.005782938935   |
| C4  | H14 | 0.0083969165803  |
| C5  | H14 | 0.048535678313   |
| C6  | H14 | 0.9752456873     |
| C7  | H14 | 0.0010727814684  |
| O8  | H14 | 0.00012669375436 |
| O9  | H14 | 0.00040423342373 |
| C1  | H14 | 0.0053594996563  |
| H11 | H14 | 0.00033779695612 |
| H12 | H14 | 0.0013449908414  |
| H13 | H14 | 0.0054897844728  |
| C1  | H15 | 0.00078578652344 |
| C2  | H15 | 0.0059811969481  |
| C3  | H15 | 0.00074110996306 |
| C4  | H15 | 3.8926569564e-05 |
| C5  | H15 | 5.9337943609e-05 |
| C6  | H15 | 0.0001761425327  |
| C7  | H15 | 0.0078039005029  |
| O8  | H15 | 0.010910716951   |
| O9  | H15 | 0.53992808837    |
| C1  | H15 | 4.1041222878e-05 |
| H11 | H15 | 0.00060667907185 |
| H12 | H15 | 7.1542673348e-06 |
| H13 | H15 | 4.89374432e-06   |
| H14 | H15 | 4.7895153274e-05 |

## (18)ANNULENE

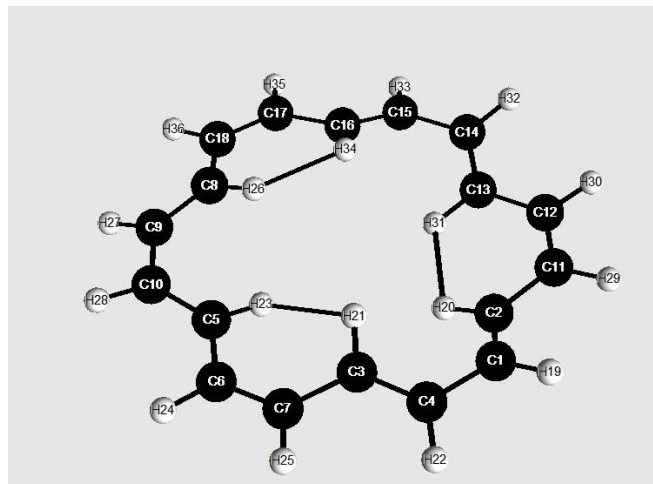

### HARTREE-FOCK

| Atom A | Atom B | Delocalization index |
|--------|--------|----------------------|
| C1     | C2     | 1.707429091          |
| C1     | C3     | 0.067815612821       |
| C2     | C3     | 0.056051697554       |
| C1     | C4     | 1.0802573435         |
| C2     | C4     | 0.066815454323       |
| C3     | C4     | 1.7077220284         |
| C1     | C5     | 0.00046753498363     |
| C2     | C5     | 0.00057221832075     |
| C3     | C5     | 0.016059053226       |
| C4     | C5     | 0.0040814585241      |
| C1     | C6     | 0.0042763154949      |
| C2     | C6     | 0.0085334881329      |
| C3     | C6     | 0.066641062722       |
| C4     | C6     | 0.058424203234       |
| C5     | C6     | 1.0961583292         |
| C1     | C7     | 0.010416398298       |
| C2     | C7     | 0.0043110825024      |
| C3     | C7     | 1.0963249291         |
| C4     | C7     | 0.067635587288       |
| C5     | C7     | 0.066684328139       |
| C6     | C7     | 1.7003134827         |
| C1     | C8     | 0.00017289750138     |
| C2     | C8     | 0.0004345729973      |
| C3     | C8     | 0.0005722109772      |
| C4     | C8     | 0.0017014492385      |
| C5     | C8     | 0.056028983469       |
| C6     | C8     | 0.0043090015477      |
| C7     | C8     | 0.0085351885731      |
| C1     | C9     | 0.00021106034774     |
| C2     | C9     | 0.00017294256019     |

|     |     |                  |
|-----|-----|------------------|
| C3  | C9  | 0.00046768153504 |
| C4  | C9  | 0.00065705587538 |
| C5  | C9  | 0.067868530364   |
| C6  | C9  | 0.01041543046    |
| C7  | C9  | 0.0042784535952  |
| C8  | C9  | 1.7073917701     |
| C1  | C1  | 0.00065674361819 |
| C2  | C1  | 0.001701182248   |
| C3  | C1  | 0.0040798865284  |
| C4  | C1  | 0.0084617711674  |
| C5  | C1  | 1.7076475241     |
| C6  | C1  | 0.067588331543   |
| C7  | C1  | 0.05843132255    |
| C8  | C1  | 0.066762940712   |
| C9  | C1  | 1.0803444308     |
| C1  | C11 | 0.068710248998   |
| C2  | C11 | 1.0973296938     |
| C3  | C11 | 0.0042480954773  |
| C4  | C11 | 0.010449853491   |
| C5  | C11 | 0.00022288431816 |
| C6  | C11 | 0.00072019273948 |
| C7  | C11 | 0.00059355685388 |
| C8  | C11 | 0.00016820267916 |
| C9  | C11 | 0.00048680355371 |
| C1  | C11 | 0.00018651841039 |
| C1  | C12 | 0.05961395789    |
| C2  | C12 | 0.066213612489   |
| C3  | C12 | 0.0085547235719  |
| C4  | C12 | 0.0043461781889  |
| C5  | C12 | 0.00017548350266 |
| C6  | C12 | 0.0021705768017  |
| C7  | C12 | 0.00072721004716 |
| C8  | C12 | 0.00023156554355 |
| C9  | C12 | 0.00018339212508 |
| C1  | C12 | 0.00053743972677 |
| C11 | C12 | 1.6987980908     |
| C1  | C13 | 0.0040762001013  |
| C2  | C13 | 0.01491577032    |
| C3  | C13 | 0.00056752855414 |
| C4  | C13 | 0.00046271106652 |
| C5  | C13 | 0.00037975344704 |
| C6  | C13 | 0.00017321669516 |
| C7  | C13 | 0.00021581896014 |
| C8  | C13 | 0.00053539372261 |
| C9  | C13 | 0.0015083797774  |
| C1  | C13 | 0.00015259906743 |
| C11 | C13 | 0.066551703832   |
| C12 | C13 | 1.0982407592     |

|     |     |                  |
|-----|-----|------------------|
| C1  | C14 | 0.0079886860294  |
| C2  | C14 | 0.0040375050181  |
| C3  | C14 | 0.001603582949   |
| C4  | C14 | 0.00060332031813 |
| C5  | C14 | 0.00015895003551 |
| C6  | C14 | 0.00050990888522 |
| C7  | C14 | 0.00018578506608 |
| C8  | C14 | 0.00046275600656 |
| C9  | C14 | 0.00059492104873 |
| C1  | C14 | 0.00023541564886 |
| C11 | C14 | 0.060423489768   |
| C12 | C14 | 0.068417924378   |
| C13 | C14 | 1.7074979613     |
| C1  | C15 | 0.00059492048944 |
| C2  | C15 | 0.00046286140978 |
| C3  | C15 | 0.00015891853371 |
| C4  | C15 | 0.00023546193961 |
| C5  | C15 | 0.0016043636784  |
| C6  | C15 | 0.00018577659578 |
| C7  | C15 | 0.00051017829463 |
| C8  | C15 | 0.0040371602526  |
| C9  | C15 | 0.007990011573   |
| C1  | C15 | 0.00060340890026 |
| C11 | C15 | 0.0043636257718  |
| C12 | C15 | 0.010389750189   |
| C13 | C15 | 0.067763773859   |
| C14 | C15 | 1.0788017685     |
| C1  | C16 | 0.0015074421613  |
| C2  | C16 | 0.00053395963416 |
| C3  | C16 | 0.0003780369887  |
| C4  | C16 | 0.00015227911058 |
| C5  | C16 | 0.00056534754796 |
| C6  | C16 | 0.00021540342979 |
| C7  | C16 | 0.00017299491686 |
| C8  | C16 | 0.014903028182   |
| C9  | C16 | 0.0040740014508  |
| C1  | C16 | 0.00046205434219 |
| C11 | C16 | 0.008213315225   |
| C12 | C16 | 0.0041754057867  |
| C13 | C16 | 0.054973682837   |
| C14 | C16 | 0.067745757324   |
| C15 | C16 | 1.7074315889     |
| C1  | C17 | 0.00018339327917 |
| C2  | C17 | 0.00023163442627 |
| C3  | C17 | 0.00017553736244 |
| C4  | C17 | 0.00053775483846 |
| C5  | C17 | 0.0085599622808  |
| C6  | C17 | 0.00072736087939 |



|     |     |                  |
|-----|-----|------------------|
| C7  | C17 | 0.0021722043702  |
| C8  | C17 | 0.066216236125   |
| C9  | C17 | 0.059626886267   |
| C1  | C17 | 0.0043472625247  |
| C11 | C17 | 0.00070677687106 |
| C12 | C17 | 0.00058801077703 |
| C13 | C17 | 0.0041778948448  |
| C14 | C17 | 0.010390884554   |
| C15 | C17 | 0.068455421392   |
| C16 | C17 | 1.0982155107     |
| C1  | C18 | 0.00048664366507 |
| C2  | C18 | 0.00016819400426 |
| C3  | C18 | 0.00022279054306 |
| C4  | C18 | 0.00018649083857 |
| C5  | C18 | 0.004245917102   |
| C6  | C18 | 0.00059310544194 |
| C7  | C18 | 0.00072014622719 |
| C8  | C18 | 1.0972955681     |
| C9  | C18 | 0.068628601189   |
| C1  | C18 | 0.010443207297   |
| C11 | C18 | 0.0020851335565  |
| C12 | C18 | 0.0007066189677  |
| C13 | C18 | 0.0082126251314  |
| C14 | C18 | 0.0043624620658  |
| C15 | C18 | 0.060417434524   |
| C16 | C18 | 0.066559999525   |
| C17 | C18 | 1.6987119916     |
| C1  | H19 | 0.96881739876    |
| C2  | H19 | 0.061599570754   |
| C3  | H19 | 0.0092325149437  |
| C4  | H19 | 0.039545892183   |
| C5  | H19 | 6.9009694985e-05 |
| C6  | H19 | 0.00089721350924 |
| C7  | H19 | 0.001249526406   |
| C8  | H19 | 3.4209069899e-05 |
| C9  | H19 | 2.0340497222e-05 |
| C1  | H19 | 0.0001522555207  |
| C11 | H19 | 0.010231779534   |
| C12 | H19 | 0.003053052551   |
| C13 | H19 | 0.00049307760462 |
| C14 | H19 | 0.00043230271631 |
| C15 | H19 | 3.7531735912e-05 |
| C16 | H19 | 7.4928780737e-05 |
| C17 | H19 | 1.7004585724e-05 |
| C18 | H19 | 2.6295472487e-05 |
| C1  | C2  | 0.058648802448   |
| C2  | C2  | 0.94220689107    |
| C3  | C2  | 0.016029943198   |

|     |     |                  |
|-----|-----|------------------|
| C4  | C2  | 0.012488700479   |
| C5  | C2  | 0.00020178550023 |
| C6  | C2  | 0.00047833581359 |
| C7  | C2  | 0.0010402242748  |
| C8  | C2  | 3.9160434574e-05 |
| C9  | C2  | 2.9397201751e-05 |
| C1  | C2  | 0.00011897930638 |
| C11 | C2  | 0.037339690843   |
| C12 | C2  | 0.005407884961   |
| C13 | C2  | 0.013885025543   |
| C14 | C2  | 0.001682041601   |
| C15 | C2  | 0.00017885924435 |
| C16 | C2  | 0.00019424057146 |
| C17 | C2  | 2.0127762568e-05 |
| C18 | C2  | 2.1671934086e-05 |
| H19 | C2  | 0.011476475606   |
| C1  | H21 | 0.013009799502   |
| C2  | H21 | 0.016526838158   |
| C3  | H21 | 0.94141123916    |
| C4  | H21 | 0.058571178759   |
| C5  | H21 | 0.015087183685   |
| C6  | H21 | 0.006488742876   |
| C7  | H21 | 0.037535732934   |
| C8  | H21 | 0.00036297914552 |
| C9  | H21 | 0.0002052335123  |
| C1  | H21 | 0.0021602563691  |
| C11 | H21 | 0.0010433770398  |
| C12 | H21 | 0.00047996279942 |
| C13 | H21 | 0.00018226278025 |
| C14 | H21 | 0.00014434100475 |
| C15 | H21 | 3.9953805525e-05 |
| C16 | H21 | 0.00010309111838 |
| C17 | H21 | 4.925383454e-05  |
| C18 | H21 | 4.5291546828e-05 |
| H19 | H21 | 0.00083751073358 |
| C2  | H21 | 0.015879696758   |
| C1  | H22 | 0.03932229323    |
| C2  | H22 | 0.0088905188023  |
| C3  | H22 | 0.061539381414   |
| C4  | H22 | 0.96959369798    |
| C5  | H22 | 0.00049587476934 |
| C6  | H22 | 0.0029817587127  |
| C7  | H22 | 0.0097431765062  |
| C8  | H22 | 9.2746280497e-05 |
| C9  | H22 | 4.4651708442e-05 |
| C1  | H22 | 0.00048004282404 |
| C11 | H22 | 0.0012363245133  |
| C12 | H22 | 0.00089442539881 |

|     |     |                  |
|-----|-----|------------------|
| C13 | H22 | 6.7866329155e-05 |
| C14 | H22 | 0.00012182728416 |
| C15 | H22 | 1.9763344065e-05 |
| C16 | H22 | 2.7122472165e-05 |
| C17 | H22 | 3.1166988724e-05 |
| C18 | H22 | 1.5977144427e-05 |
| H19 | H22 | 0.0036277797478  |
| C2  | H22 | 0.00081653084506 |
| H21 | H22 | 0.011504339562   |
| C1  | H23 | 0.00020524689701 |
| C2  | H23 | 0.00036303552291 |
| C3  | H23 | 0.015092747203   |
| C4  | H23 | 0.002161769264   |
| C5  | H23 | 0.94145700843    |
| C6  | H23 | 0.037506232218   |
| C7  | H23 | 0.0065088544463  |
| C8  | H23 | 0.016527769377   |
| C9  | H23 | 0.013007957267   |
| C1  | H23 | 0.058571475087   |
| C11 | H23 | 4.529559654e-05  |
| C12 | H23 | 4.92369377e-05   |
| C13 | H23 | 0.00010519575846 |
| C14 | H23 | 3.9959347509e-05 |
| C15 | H23 | 0.00014430470578 |
| C16 | H23 | 0.00017924485396 |
| C17 | H23 | 0.00048020323761 |
| C18 | H23 | 0.0010434324956  |
| H19 | H23 | 4.4462032367e-05 |
| C2  | H23 | 0.00051301148282 |
| H21 | H23 | 0.021843353681   |
| H22 | H23 | 0.00042285386723 |
| C1  | H24 | 0.00044897428211 |
| C2  | H24 | 0.00056551391764 |
| C3  | H24 | 0.0098200651219  |
| C4  | H24 | 0.0039958253805  |
| C5  | H24 | 0.040081721604   |
| C6  | H24 | 0.96878483248    |
| C7  | H24 | 0.060889417394   |
| C8  | H24 | 0.00049556034991 |
| C9  | H24 | 0.00072504229966 |
| C1  | H24 | 0.0087007315141  |
| C11 | H24 | 4.821532538e-05  |
| C12 | H24 | 0.00014547589029 |
| C13 | H24 | 1.1555669369e-05 |
| C14 | H24 | 3.430856489e-05  |
| C15 | H24 | 1.1795918683e-05 |
| C16 | H24 | 1.4707338759e-05 |
| C17 | H24 | 5.3608523721e-05 |

|     |     |                  |
|-----|-----|------------------|
| C18 | H24 | 7.8001944789e-05 |
| H19 | H24 | 9.436745178e-05  |
| C2  | H24 | 3.9895706123e-05 |
| H21 | H24 | 0.00039669919479 |
| H22 | H24 | 0.00020397765086 |
| H23 | H24 | 0.008143406139   |
| C1  | H25 | 0.00072494482986 |
| C2  | H25 | 0.00049548641674 |
| C3  | H25 | 0.040140504489   |
| C4  | H25 | 0.0087079480478  |
| C5  | H25 | 0.0098204749116  |
| C6  | H25 | 0.060831729357   |
| C7  | H25 | 0.96905126357    |
| C8  | H25 | 0.00056556472093 |
| C9  | H25 | 0.00044908534994 |
| C1  | H25 | 0.0039957587567  |
| C11 | H25 | 7.8006758361e-05 |
| C12 | H25 | 5.3582154081e-05 |
| C13 | H25 | 1.4838433253e-05 |
| C14 | H25 | 1.1794370913e-05 |
| C15 | H25 | 3.4323929453e-05 |
| C16 | H25 | 1.1467021729e-05 |
| C17 | H25 | 0.00014556692715 |
| C18 | H25 | 4.8200480791e-05 |
| H19 | H25 | 3.8179513031e-05 |
| C2  | H25 | 0.00028831951535 |
| H21 | H25 | 0.0081434330796  |
| H22 | H25 | 0.0056348702197  |
| H23 | H25 | 0.00039684051019 |
| H24 | H25 | 0.0078973019566  |
| C1  | H26 | 2.9277072637e-05 |
| C2  | H26 | 3.8818310969e-05 |
| C3  | H26 | 0.00020135794103 |
| C4  | H26 | 0.00011885126179 |
| C5  | H26 | 0.016018950453   |
| C6  | H26 | 0.0010396248893  |
| C7  | H26 | 0.00047830621999 |
| C8  | H26 | 0.9421966268     |
| C9  | H26 | 0.058699699549   |
| C1  | H26 | 0.012472978014   |
| C11 | H26 | 2.1613049077e-05 |
| C12 | H26 | 2.0055069813e-05 |
| C13 | H26 | 0.00019584888942 |
| C14 | H26 | 0.0001786195808  |
| C15 | H26 | 0.0016815688011  |
| C16 | H26 | 0.013850736065   |
| C17 | H26 | 0.0054114861848  |
| C18 | H26 | 0.03735543954    |

|     |     |                  |
|-----|-----|------------------|
| H19 | H26 | 3.7805046597e-06 |
| C2  | H26 | 4.0442149507e-05 |
| H21 | H26 | 0.00051262167712 |
| H22 | H26 | 1.9972005475e-05 |
| H23 | H26 | 0.01588471553    |
| H24 | H26 | 0.00028828537852 |
| H25 | H26 | 3.986035118e-05  |
| C1  | H27 | 2.0324136016e-05 |
| C2  | H27 | 3.4177633556e-05 |
| C3  | H27 | 6.8972629111e-05 |
| C4  | H27 | 0.00015212915868 |
| C5  | H27 | 0.0092295890438  |
| C6  | H27 | 0.0012492398326  |
| C7  | H27 | 0.00089665654558 |
| C8  | H27 | 0.061578517465   |
| C9  | H27 | 0.96871920981    |
| C1  | H27 | 0.039542024484   |
| C11 | H27 | 2.6302764336e-05 |
| C12 | H27 | 1.699110157e-05  |
| C13 | H27 | 7.5086995449e-05 |
| C14 | H27 | 3.7531903546e-05 |
| C15 | H27 | 0.00043239774713 |
| C16 | H27 | 0.00049250629837 |
| C17 | H27 | 0.0030539798525  |
| C18 | H27 | 0.010192609121   |
| H19 | H27 | 3.760367699e-06  |
| C2  | H27 | 3.8121205641e-06 |
| H21 | H27 | 4.4448647938e-05 |
| H22 | H27 | 8.6725375251e-06 |
| H23 | H27 | 0.00083733273518 |
| H24 | H27 | 3.816021582e-05  |
| H25 | H27 | 9.4338763842e-05 |
| H26 | H27 | 0.011475869327   |
| C1  | H28 | 4.4630443114e-05 |
| C2  | H28 | 9.2733954097e-05 |
| C3  | H28 | 0.00049577934858 |
| C4  | H28 | 0.00048007574003 |
| C5  | H28 | 0.061480436357   |
| C6  | H28 | 0.0097284771421  |
| C7  | H28 | 0.0029824901683  |
| C8  | H28 | 0.0088865000077  |
| C9  | H28 | 0.03932249245    |
| C1  | H28 | 0.96955681497    |
| C11 | H28 | 1.5970857606e-05 |
| C12 | H28 | 3.1147376225e-05 |
| C13 | H28 | 2.7269642597e-05 |
| C14 | H28 | 1.974997977e-05  |
| C15 | H28 | 0.00012168935779 |

|     |     |                  |
|-----|-----|------------------|
| C16 | H28 | 6.7547770398e-05 |
| C17 | H28 | 0.00089384419641 |
| C18 | H28 | 0.0012359923957  |
| H19 | H28 | 8.6781160931e-06 |
| C2  | H28 | 2.0011715642e-05 |
| H21 | H28 | 0.00042248180017 |
| H22 | H28 | 3.3659096071e-05 |
| H23 | H28 | 0.011504795531   |
| H24 | H28 | 0.0056345722681  |
| H25 | H28 | 0.00020398057837 |
| H26 | H28 | 0.0008160274689  |
| H27 | H28 | 0.0036295129497  |
| C1  | H29 | 0.008892318347   |
| C2  | H29 | 0.040174266997   |
| C3  | H29 | 0.00046228976669 |
| C4  | H29 | 0.00073784585011 |
| C5  | H29 | 1.4519034391e-05 |
| C6  | H29 | 4.7054918992e-05 |
| C7  | H29 | 7.4461432488e-05 |
| C8  | H29 | 1.1172759718e-05 |
| C9  | H29 | 3.2388921022e-05 |
| C1  | H29 | 1.1307680159e-05 |
| C11 | H29 | 0.96823858889    |
| C12 | H29 | 0.06094408017    |
| C13 | H29 | 0.00982968673    |
| C14 | H29 | 0.0040963251821  |
| C15 | H29 | 0.0004480768795  |
| C16 | H29 | 0.00054817960516 |
| C17 | H29 | 4.7089890328e-05 |
| C18 | H29 | 0.00014153318776 |
| H19 | H29 | 0.0062776386978  |
| C2  | H29 | 0.0083459960152  |
| H21 | H29 | 0.00026995715894 |
| H22 | H29 | 3.349098447e-05  |
| H23 | H29 | 1.2093146782e-05 |
| H24 | H29 | 4.3323903019e-06 |
| H25 | H29 | 6.9240953951e-06 |
| H26 | H29 | 1.9416106895e-06 |
| H27 | H29 | 1.7230151175e-06 |
| H28 | H29 | 1.0098283741e-06 |
| C1  | C3  | 0.0040422647912  |
| C2  | C3  | 0.0098318140025  |
| C3  | C3  | 0.00056789370318 |
| C4  | C3  | 0.000449602117   |
| C5  | C3  | 1.1106189246e-05 |
| C6  | C3  | 0.00014518150032 |
| C7  | C3  | 4.7245990146e-05 |
| C8  | C3  | 1.5096868484e-05 |

|     |     |                  |
|-----|-----|------------------|
| C9  | C3  | 9.9573868531e-06 |
| C1  | C3  | 3.5698364256e-05 |
| C11 | C3  | 0.061021291295   |
| C12 | C3  | 0.96818325936    |
| C13 | C3  | 0.040141528069   |
| C14 | C3  | 0.0087078900293  |
| C15 | C3  | 0.00074917890392 |
| C16 | C3  | 0.00044625445831 |
| C17 | C3  | 6.920697285e-05  |
| C18 | C3  | 4.2881553144e-05 |
| H19 | C3  | 0.00021823256658 |
| C2  | C3  | 0.00035297716021 |
| H21 | C3  | 3.7137400068e-05 |
| H22 | C3  | 9.1874722461e-05 |
| H23 | C3  | 6.3409801656e-06 |
| H24 | C3  | 9.2516950938e-06 |
| H25 | C3  | 4.6127555388e-06 |
| H26 | C3  | 4.4354849736e-06 |
| H27 | C3  | 1.036604463e-06  |
| H28 | C3  | 1.9872498179e-06 |
| H29 | C3  | 0.008162237849   |
| C1  | H31 | 0.0017797836005  |
| C2  | H31 | 0.014142897917   |
| C3  | H31 | 0.00023057654227 |
| C4  | H31 | 0.00017435624308 |
| C5  | H31 | 9.5337186703e-05 |
| C6  | H31 | 3.1907908929e-05 |
| C7  | H31 | 2.9678605426e-05 |
| C8  | H31 | 0.00013900769909 |
| C9  | H31 | 0.00014578616787 |
| C1  | H31 | 2.4707953724e-05 |
| C11 | H31 | 0.0053136742928  |
| C12 | H31 | 0.037231211384   |
| C13 | H31 | 0.94435540823    |
| C14 | H31 | 0.058788785255   |
| C15 | H31 | 0.013678444978   |
| C16 | H31 | 0.016424657658   |
| C17 | H31 | 0.00096339756702 |
| C18 | H31 | 0.00053636604734 |
| H19 | H31 | 0.00046254452542 |
| C2  | H31 | 0.024418934431   |
| H21 | H31 | 0.00032696973048 |
| H22 | H31 | 3.1222498931e-05 |
| H23 | H31 | 0.00016900600796 |
| H24 | H31 | 5.8653634953e-06 |
| H25 | H31 | 7.7764828069e-06 |
| H26 | H31 | 0.00022385415926 |
| H27 | H31 | 1.0742267024e-05 |

|     |     |                  |
|-----|-----|------------------|
| H28 | H31 | 1.1334426707e-05 |
| H29 | H31 | 0.00034398210879 |
| C3  | H31 | 0.0084633150313  |
| C1  | H32 | 0.00043306356065 |
| C2  | H32 | 0.00049306101293 |
| C3  | H32 | 8.0072675334e-05 |
| C4  | H32 | 3.8062377848e-05 |
| C5  | H32 | 3.295897478e-05  |
| C6  | H32 | 2.7912502553e-05 |
| C7  | H32 | 1.7568836462e-05 |
| C8  | H32 | 7.3482736359e-05 |
| C9  | H32 | 0.00014160904676 |
| C1  | H32 | 2.0383135762e-05 |
| C11 | H32 | 0.0030783979882  |
| C12 | H32 | 0.0099638479243  |
| C13 | H32 | 0.06137667087    |
| C14 | H32 | 0.96891220763    |
| C15 | H32 | 0.039367146278   |
| C16 | H32 | 0.0095957936259  |
| C17 | H32 | 0.0012701623654  |
| C18 | H32 | 0.0010456510147  |
| H19 | H32 | 3.3970766735e-05 |
| C2  | H32 | 0.00045913549554 |
| H21 | H32 | 1.4507481295e-05 |
| H22 | H32 | 7.527352878e-06  |
| H23 | H32 | 1.296629422e-05  |
| H24 | H32 | 1.8072507432e-06 |
| H25 | H32 | 1.1523892397e-06 |
| H26 | H32 | 2.8268894892e-05 |
| H27 | H32 | 8.5375481535e-06 |
| H28 | H32 | 2.3346645267e-06 |
| H29 | H32 | 0.00021831054828 |
| C3  | H32 | 0.0062313549134  |
| H31 | H32 | 0.011433579398   |
| C1  | H33 | 0.00014155639658 |
| C2  | H33 | 7.3508150909e-05 |
| C3  | H33 | 3.2938112845e-05 |
| C4  | H33 | 2.038220512e-05  |
| C5  | H33 | 8.0097203666e-05 |
| C6  | H33 | 1.7561260258e-05 |
| C7  | H33 | 2.7923720964e-05 |
| C8  | H33 | 0.00049301628155 |
| C9  | H33 | 0.00043310542867 |
| C1  | H33 | 3.8058142364e-05 |
| C11 | H33 | 0.0010457948914  |
| C12 | H33 | 0.0012700693494  |
| C13 | H33 | 0.0095992495119  |
| C14 | H33 | 0.039360752132   |



|     |     |                  |
|-----|-----|------------------|
| C15 | H33 | 0.96896093378    |
| C16 | H33 | 0.061353112621   |
| C17 | H33 | 0.0099741152453  |
| C18 | H33 | 0.0030781872065  |
| H19 | H33 | 8.5362352287e-06 |
| C2  | H33 | 2.8332549962e-05 |
| H21 | H33 | 1.2964635172e-05 |
| H22 | H33 | 2.3366314292e-06 |
| H23 | H33 | 1.4499224602e-05 |
| H24 | H33 | 1.1523258071e-06 |
| H25 | H33 | 1.807813199e-06  |
| H26 | H33 | 0.00045907715714 |
| H27 | H33 | 3.3974116355e-05 |
| H28 | H33 | 7.5213129253e-06 |
| H29 | H33 | 9.8825223181e-05 |
| C3  | H33 | 3.5551062351e-05 |
| H31 | H33 | 0.00088750793744 |
| H32 | H33 | 0.00327167974    |
| C1  | H34 | 0.00014576651746 |
| C2  | H34 | 0.00013899284389 |
| C3  | H34 | 9.5311044725e-05 |
| C4  | H34 | 2.4708150691e-05 |
| C5  | H34 | 0.00023025295181 |
| C6  | H34 | 2.9649466927e-05 |
| C7  | H34 | 3.1895309955e-05 |
| C8  | H34 | 0.014148654173   |
| C9  | H34 | 0.0017799427766  |
| C1  | H34 | 0.00017417999434 |
| C11 | H34 | 0.00053674466079 |
| C12 | H34 | 0.00096345644982 |
| C13 | H34 | 0.016468636832   |
| C14 | H34 | 0.013677232149   |
| C15 | H34 | 0.058804245488   |
| C16 | H34 | 0.94244948731    |
| C17 | H34 | 0.037247758568   |
| C18 | H34 | 0.0053334281168  |
| H19 | H34 | 1.0734685736e-05 |
| C2  | H34 | 0.00022423011758 |
| H21 | H34 | 0.00016892717154 |
| H22 | H34 | 1.1334968341e-05 |
| H23 | H34 | 0.00032670775039 |
| H24 | H34 | 7.7667445996e-06 |
| H25 | H34 | 5.8620096e-06    |
| H26 | H34 | 0.024425818667   |
| H27 | H34 | 0.00046265753777 |
| H28 | H34 | 3.1172138495e-05 |
| H29 | H34 | 3.9452455396e-05 |
| C3  | H34 | 0.00023463704301 |

|     |     |                  |
|-----|-----|------------------|
| H31 | H34 | 0.014183323425   |
| H32 | H34 | 0.00088744660458 |
| H33 | H34 | 0.011433998395   |
| C1  | H35 | 9.9568683075e-06 |
| C2  | H35 | 1.5102503891e-05 |
| C3  | H35 | 1.1109508136e-05 |
| C4  | H35 | 3.5716338564e-05 |
| C5  | H35 | 0.00056814821698 |
| C6  | H35 | 4.7244723997e-05 |
| C7  | H35 | 0.00014527655929 |
| C8  | H35 | 0.0098315022907  |
| C9  | H35 | 0.0040431671274  |
| C1  | H35 | 0.00044961882216 |
| C11 | H35 | 4.289485241e-05  |
| C12 | H35 | 6.9216886125e-05 |
| C13 | H35 | 0.00044703344159 |
| C14 | H35 | 0.0007491051296  |
| C15 | H35 | 0.0087202734811  |
| C16 | H35 | 0.040131002166   |
| C17 | H35 | 0.96818965123    |
| C18 | H35 | 0.060978969409   |
| H19 | H35 | 1.0372702006e-06 |
| C2  | H35 | 4.4596464986e-06 |
| H21 | H35 | 6.3408827697e-06 |
| H22 | H35 | 1.9881568531e-06 |
| H23 | H35 | 3.715005605e-05  |
| H24 | H35 | 4.6142662039e-06 |
| H25 | H35 | 9.2568837702e-06 |
| H26 | H35 | 0.00035283888678 |
| H27 | H35 | 0.00021826030953 |
| H28 | H35 | 9.1854222571e-05 |
| H29 | H35 | 3.8860307949e-06 |
| C3  | H35 | 6.3644698904e-06 |
| H31 | H35 | 0.00023467783075 |
| H32 | H35 | 3.5558975516e-05 |
| H33 | H35 | 0.0062303530641  |
| H34 | H35 | 0.0084626543333  |
| C1  | H36 | 3.2377978904e-05 |
| C2  | H36 | 1.1170160759e-05 |
| C3  | H36 | 1.4512245056e-05 |
| C4  | H36 | 1.1300814414e-05 |
| C5  | H36 | 0.00046198899269 |
| C6  | H36 | 7.4431612119e-05 |
| C7  | H36 | 4.7029005485e-05 |
| C8  | H36 | 0.040151020628   |
| C9  | H36 | 0.0088718021249  |
| C1  | H36 | 0.00073736283591 |
| C11 | H36 | 0.00014153659863 |

|     |     |                  |
|-----|-----|------------------|
| C12 | H36 | 4.7076661023e-05 |
| C13 | H36 | 0.00054821694762 |
| C14 | H36 | 0.00044802734382 |
| C15 | H36 | 0.0040957873547  |
| C16 | H36 | 0.0098290648973  |
| C17 | H36 | 0.060935229724   |
| C18 | H36 | 0.96800780981    |
| H19 | H36 | 1.7223238104e-06 |
| C2  | H36 | 1.9588979894e-06 |
| H21 | H36 | 1.2095418384e-05 |
| H22 | H36 | 1.0098863395e-06 |
| H23 | H36 | 0.00027000864281 |
| H24 | H36 | 6.9292124115e-06 |
| H25 | H36 | 4.3299821455e-06 |
| H26 | H36 | 0.0083471648693  |
| H27 | H36 | 0.006278028613   |
| H28 | H36 | 3.3460653288e-05 |
| H29 | H36 | 9.1353353317e-06 |
| C3  | H36 | 3.8851864184e-06 |
| H31 | H36 | 3.9433656636e-05 |
| H32 | H36 | 9.8818606987e-05 |
| H33 | H36 | 0.00021829005259 |
| H34 | H36 | 0.00034418556576 |
| H35 | H36 | 0.0081620563895  |

## FLUROBENZENE

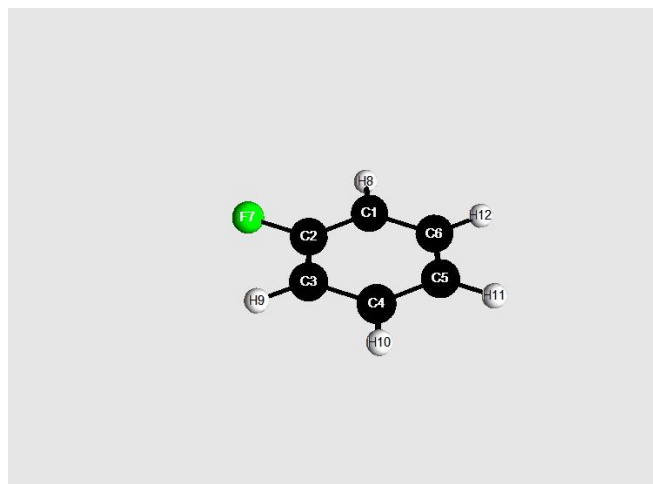

## HARTREE-FOCK

| Atom A | Atom B | Delocalization index |
|--------|--------|----------------------|
| C1     | C2     | 1.3335393189         |
| C1     | C3     | 0.061965631846       |
| C2     | C3     | 1.3334755602         |
| C1     | C4     | 0.097983524981       |
| C2     | C4     | 0.079867079391       |
| C3     | C4     | 1.3828003788         |
| C1     | C5     | 0.072435144997       |
| C2     | C5     | 0.090255455221       |
| C3     | C5     | 0.072421434314       |
| C4     | C5     | 1.3879840249         |
| C1     | C6     | 1.3827833546         |
| C2     | C6     | 0.079894632385       |
| C3     | C6     | 0.097988659286       |
| C4     | C6     | 0.077287567792       |
| C5     | C6     | 1.3879608232         |
| C1     | F7     | 0.10148093958        |
| C2     | F7     | 0.72264435742        |
| C3     | F7     | 0.10146128241        |
| C4     | F7     | 0.012688951954       |
| C5     | F7     | 0.014640423914       |
| C6     | F7     | 0.012690665907       |
| C1     | H8     | 0.96766385264        |
| C2     | H8     | 0.048675550939       |
| C3     | H8     | 0.0064686695916      |
| C4     | H8     | 0.0059171151118      |
| C5     | H8     | 0.0081866031546      |
| C6     | H8     | 0.044682772182       |
| F7     | H8     | 0.01259611358        |
| C1     | H9     | 0.0064702418449      |
| C2     | H9     | 0.048651620863       |

|     |     |                  |
|-----|-----|------------------|
| C3  | H9  | 0.96765618475    |
| C4  | H9  | 0.044705677189   |
| C5  | H9  | 0.0081859330746  |
| C6  | H9  | 0.0059196666735  |
| F7  | H9  | 0.012596244469   |
| H8  | H9  | 0.0015429849856  |
| C1  | C1  | 0.0060256580751  |
| C2  | C1  | 0.0086079983411  |
| C3  | C1  | 0.048921109857   |
| C4  | C1  | 0.97394821803    |
| C5  | C1  | 0.04781816757    |
| C6  | C1  | 0.0086307685033  |
| F7  | C1  | 0.0015781204984  |
| H8  | C1  | 0.00034658816012 |
| H9  | C1  | 0.0055464666769  |
| C1  | H11 | 0.0086737919506  |
| C2  | H11 | 0.0058084871468  |
| C3  | H11 | 0.0086725199185  |
| C4  | H11 | 0.049418674301   |
| C5  | H11 | 0.97713270314    |
| C6  | H11 | 0.049420880343   |
| F7  | H11 | 0.0011072270147  |
| H8  | H11 | 0.0012636743835  |
| H9  | H11 | 0.001263676802   |
| C1  | H11 | 0.0055470688027  |
| C1  | H12 | 0.048913510222   |
| C2  | H12 | 0.0086080619121  |
| C3  | H12 | 0.0060241497998  |
| C4  | H12 | 0.0086289064494  |
| C5  | H12 | 0.047795597698   |
| C6  | H12 | 0.97388076247    |
| F7  | H12 | 0.0015781194062  |
| H8  | H12 | 0.0055464609622  |
| H9  | H12 | 0.00034659070038 |
| C1  | H12 | 0.0014511181194  |
| H11 | H12 | 0.0055470641725  |

## NITROBENZENE

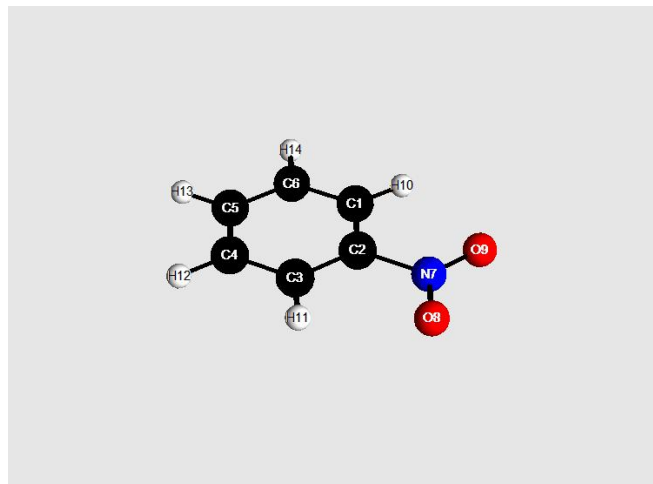

## HARTREE-FOCK

| Atom A | Atom B | Delocalization index |
|--------|--------|----------------------|
| C1     | C2     | 1.3297005779         |
| C1     | C3     | 0.061860613659       |
| C2     | C3     | 1.3296890327         |
| C1     | C4     | 0.094873815906       |
| C2     | C4     | 0.077321844811       |
| C3     | C4     | 1.3894418853         |
| C1     | C5     | 0.077243326103       |
| C2     | C5     | 0.089716676739       |
| C3     | C5     | 0.077234052444       |
| C4     | C5     | 1.3823056439         |
| C1     | C6     | 1.3894286096         |
| C2     | C6     | 0.077331192258       |
| C3     | C6     | 0.094870411845       |
| C4     | C6     | 0.072363087752       |
| C5     | C6     | 1.3822519278         |
| C1     | N7     | 0.067429335939       |
| C2     | N7     | 0.79891742341        |
| C3     | N7     | 0.067452650108       |
| C4     | N7     | 0.0091220655325      |
| C5     | N7     | 0.011372316893       |
| C6     | N7     | 0.009121317005       |
| C1     | O8     | 0.01864812729        |
| C2     | O8     | 0.073729041195       |
| C3     | O8     | 0.043816123358       |
| C4     | O8     | 0.0035055406475      |
| C5     | O8     | 0.00668266057        |
| C6     | O8     | 0.0039132324297      |
| N7     | O8     | 1.6810634514         |
| C1     | O9     | 0.043872983077       |
| C2     | O9     | 0.073709514832       |

|     |     |                  |
|-----|-----|------------------|
| C3  | O9  | 0.018645833588   |
| C4  | O9  | 0.0039130427086  |
| C5  | O9  | 0.0066829369709  |
| C6  | O9  | 0.0035055548099  |
| N7  | O9  | 1.6810134006     |
| O8  | O9  | 0.32348567941    |
| C1  | C1  | 0.94338751097    |
| C2  | C1  | 0.042172781234   |
| C3  | C1  | 0.006859797507   |
| C4  | C1  | 0.0048386857597  |
| C5  | C1  | 0.0074269401159  |
| C6  | C1  | 0.040683862597   |
| N7  | C1  | 0.0056962271176  |
| O8  | C1  | 0.0019275387093  |
| O9  | C1  | 0.032560535778   |
| C1  | H11 | 0.0068612325004  |
| C2  | H11 | 0.04217514535    |
| C3  | H11 | 0.94336574441    |
| C4  | H11 | 0.040699516179   |
| C5  | H11 | 0.0074264494183  |
| C6  | H11 | 0.0048396837941  |
| N7  | H11 | 0.00570120503    |
| O8  | H11 | 0.032562261804   |
| O9  | H11 | 0.0019273736801  |
| C1  | H11 | 0.0013902470709  |
| C1  | H12 | 0.0055680835047  |
| C2  | H12 | 0.0085331583056  |
| C3  | H12 | 0.048915071471   |
| C4  | H12 | 0.97253891952    |
| C5  | H12 | 0.047606400198   |
| C6  | H12 | 0.0082723275822  |
| N7  | H12 | 0.0012897333776  |
| O8  | H12 | 0.00014040589194 |
| O9  | H12 | 0.0005698156837  |
| C1  | H12 | 0.00028260235686 |
| H11 | H12 | 0.0052529769576  |
| C1  | H13 | 0.0083809495829  |
| C2  | H13 | 0.005330530546   |
| C3  | H13 | 0.0083798582845  |
| C4  | H13 | 0.047176505811   |
| C5  | H13 | 0.97169134395    |
| C6  | H13 | 0.047172631319   |
| N7  | H13 | 0.00063527221243 |
| O8  | H13 | 0.00045909866756 |
| O9  | H13 | 0.00045910108081 |
| C1  | H13 | 0.0011129280319  |
| H11 | H13 | 0.0011129372981  |
| H12 | H13 | 0.0053904028969  |

|     |     |                  |
|-----|-----|------------------|
| C1  | H14 | 0.048910993587   |
| C2  | H14 | 0.0085331119132  |
| C3  | H14 | 0.0055668576493  |
| C4  | H14 | 0.008271785193   |
| C5  | H14 | 0.04758021263    |
| C6  | H14 | 0.97247695913    |
| N7  | H14 | 0.0012896468447  |
| O8  | H14 | 0.00056981658459 |
| O9  | H14 | 0.00014040743847 |
| C1  | H14 | 0.0052529835822  |
| H11 | H14 | 0.00028260289242 |
| H12 | H14 | 0.0013307014808  |
| H13 | H14 | 0.0053903996373  |



## BROMOBENZENE

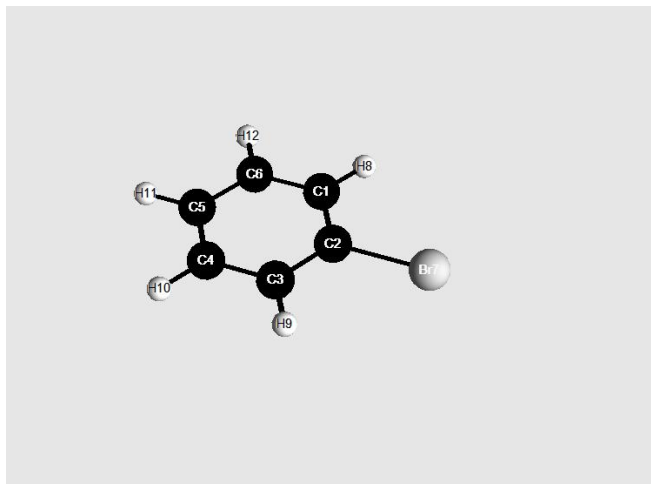

## HARTREE-FOCK

| Atom A | Atom B | Delocalization index |
|--------|--------|----------------------|
| C1     | C2     | 1.3710777984         |
| C1     | C3     | 0.063645559806       |
| C2     | C3     | 1.3710067642         |
| C1     | C4     | 0.09707806359        |
| C2     | C4     | 0.078814304889       |
| C3     | C4     | 1.3819146144         |
| C1     | C5     | 0.073024918729       |
| C2     | C5     | 0.096128794011       |
| C3     | C5     | 0.073018292253       |
| C4     | C5     | 1.3866608437         |
| C1     | C6     | 1.3818944797         |
| C2     | C6     | 0.078833650458       |
| C3     | C6     | 0.097088171086       |
| C4     | C6     | 0.075470850512       |
| C5     | C6     | 1.3866287256         |
| C1     | Br7    | 0.089130203689       |
| C2     | Br7    | 1.1200026843         |
| C3     | Br7    | 0.089103593661       |
| C4     | Br7    | 0.016389294412       |
| C5     | Br7    | 0.014765062774       |
| C6     | Br7    | 0.016391604477       |
| C1     | H8     | 0.962656695          |
| C2     | H8     | 0.048657569604       |
| C3     | H8     | 0.0073324323815      |
| C4     | H8     | 0.0056734936814      |
| C5     | H8     | 0.0079337048969      |
| C6     | H8     | 0.045088874648       |
| Br7    | H8     | 0.023537862865       |
| C1     | H9     | 0.0073334063999      |
| C2     | H9     | 0.048619561548       |

|     |     |                  |
|-----|-----|------------------|
| C3  | H9  | 0.96264085143    |
| C4  | H9  | 0.045112227614   |
| C5  | H9  | 0.0079330639219  |
| C6  | H9  | 0.005675364641   |
| Br7 | H9  | 0.02353845719    |
| H8  | H9  | 0.0014004036372  |
| C1  | C1  | 0.0059183393921  |
| C2  | C1  | 0.0087571011291  |
| C3  | C1  | 0.048931211356   |
| C4  | C1  | 0.97359870021    |
| C5  | C1  | 0.047941125467   |
| C6  | C1  | 0.0085296997539  |
| Br7 | C1  | 0.0023446681862  |
| H8  | C1  | 0.00034519079934 |
| H9  | C1  | 0.0056056167154  |
| C1  | H11 | 0.0084760145916  |
| C2  | H11 | 0.0059236463651  |
| C3  | H11 | 0.0084753447027  |
| C4  | H11 | 0.048628177579   |
| C5  | H11 | 0.9753712093     |
| C6  | H11 | 0.048631559763   |
| Br7 | H11 | 0.001258278726   |
| H8  | H11 | 0.0012266619906  |
| H9  | H11 | 0.0012266688796  |
| C1  | H11 | 0.0054981946533  |
| C1  | H12 | 0.048931599203   |
| C2  | H12 | 0.0087570090811  |
| C3  | H12 | 0.0059175027379  |
| C4  | H12 | 0.0085285201203  |
| C5  | H12 | 0.047914460939   |
| C6  | H12 | 0.97353878859    |
| Br7 | H12 | 0.0023446673553  |
| H8  | H12 | 0.0056055857153  |
| H9  | H12 | 0.00034519853307 |
| C1  | H12 | 0.0014086769447  |
| H11 | H12 | 0.0054981782805  |

## CHLOROBENZENE

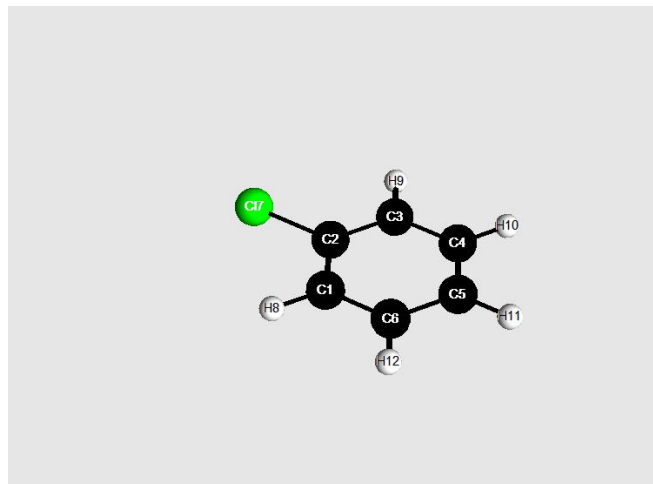

### HARTREE-FOCK

| Atom A | Atom B | Delocalization index |
|--------|--------|----------------------|
| C1     | C2     | 1.35952819           |
| C1     | C3     | 0.062753567341       |
| C2     | C3     | 1.3595029078         |
| C1     | C4     | 0.097072082502       |
| C2     | C4     | 0.078467817386       |
| C3     | C4     | 1.3829659226         |
| C1     | C5     | 0.072804729056       |
| C2     | C5     | 0.094551728034       |
| C3     | C5     | 0.072795991462       |
| C4     | C5     | 1.3867028054         |
| C1     | C6     | 1.3829489549         |
| C2     | C6     | 0.07848681388        |
| C3     | C6     | 0.097081110299       |
| C4     | C6     | 0.075724394545       |
| C5     | C6     | 1.3866727198         |
| C1     | Cl7    | 0.095674877078       |
| C2     | Cl7    | 1.0823389638         |
| C3     | Cl7    | 0.095694149973       |
| C4     | Cl7    | 0.015751316489       |
| C5     | Cl7    | 0.016090902887       |
| C6     | Cl7    | 0.015753645083       |
| C1     | H8     | 0.96337557668        |
| C2     | H8     | 0.047948630677       |
| C3     | H8     | 0.0071511318283      |
| C4     | H8     | 0.0056838573575      |
| C5     | H8     | 0.0079695926242      |
| C6     | H8     | 0.045019381485       |
| Cl7    | H8     | 0.021790003677       |
| C1     | H9     | 0.0071523600805      |
| C2     | H9     | 0.04793489599        |

|     |     |                  |
|-----|-----|------------------|
| C3  | H9  | 0.96339846171    |
| C4  | H9  | 0.045041545881   |
| C5  | H9  | 0.0079688621921  |
| C6  | H9  | 0.0056858288563  |
| Cl7 | H9  | 0.02179125493    |
| H8  | H9  | 0.001451401666   |
| C1  | C1  | 0.0059371814835  |
| C2  | C1  | 0.0087093800098  |
| C3  | C1  | 0.04897229498    |
| C4  | C1  | 0.97378131262    |
| C5  | C1  | 0.047941593328   |
| C6  | C1  | 0.0085464822491  |
| Cl7 | C1  | 0.0021342088773  |
| H8  | C1  | 0.00034376220844 |
| H9  | C1  | 0.0055874143746  |
| C1  | H11 | 0.0085094599921  |
| C2  | H11 | 0.0058844369625  |
| C3  | H11 | 0.0085088058309  |
| C4  | H11 | 0.048769141539   |
| C5  | H11 | 0.97572896535    |
| C6  | H11 | 0.048772557391   |
| Cl7 | H11 | 0.0013116007852  |
| H8  | H11 | 0.0012349067825  |
| H9  | H11 | 0.0012349040193  |
| C1  | H11 | 0.0055104917729  |
| C1  | H12 | 0.048972123148   |
| C2  | H12 | 0.0087093199438  |
| C3  | H12 | 0.0059360477549  |
| C4  | H12 | 0.0085450054193  |
| C5  | H12 | 0.047915694542   |
| C6  | H12 | 0.97371943886    |
| Cl7 | H12 | 0.0021342056976  |
| H8  | H12 | 0.0055874182072  |
| H9  | H12 | 0.00034375961766 |
| C1  | H12 | 0.0014139912376  |
| H11 | H12 | 0.0055104701931  |

## HEPTALENE

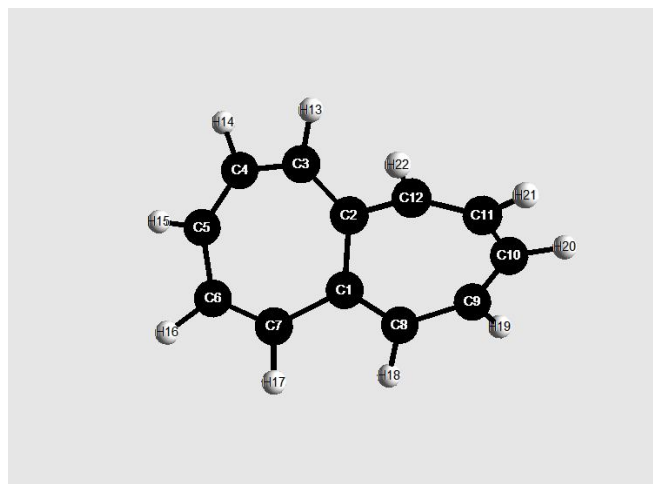

### HARTREE-FOCK

| Atom A | Atom B | Delocalization index |
|--------|--------|----------------------|
| C1     | C2     | 1.0284821146         |
| C1     | C3     | 0.059443269696       |
| C2     | C3     | 1.6703657643         |
| C1     | C4     | 0.013636016672       |
| C2     | C4     | 0.06536425932        |
| C3     | C4     | 1.1012522753         |
| C1     | C5     | 0.0132135053         |
| C2     | C5     | 0.056097427401       |
| C3     | C5     | 0.064191898801       |
| C4     | C5     | 1.6999681606         |
| C1     | C6     | 0.060469557637       |
| C2     | C6     | 0.016635430078       |
| C3     | C6     | 0.015821518646       |
| C4     | C6     | 0.06633527312        |
| C5     | C6     | 1.0958794769         |
| C1     | C7     | 1.0368662092         |
| C2     | C7     | 0.062908181226       |
| C3     | C7     | 0.018688859385       |
| C4     | C7     | 0.060276351923       |
| C5     | C7     | 0.066906521759       |
| C6     | C7     | 1.7237089586         |
| C1     | C8     | 1.6704495099         |
| C2     | C8     | 0.059333933162       |
| C3     | C8     | 0.033513494182       |
| C4     | C8     | 0.0058137832854      |
| C5     | C8     | 0.0059399644378      |
| C6     | C8     | 0.035290983781       |
| C7     | C8     | 0.069618707589       |
| C1     | C9     | 0.065345473874       |
| C2     | C9     | 0.013619214764       |

|     |     |                  |
|-----|-----|------------------|
| C3  | C9  | 0.005808915966   |
| C4  | C9  | 0.00088667703303 |
| C5  | C9  | 0.0010225862607  |
| C6  | C9  | 0.0034857511242  |
| C7  | C9  | 0.0092731803557  |
| C8  | C9  | 1.1012955659     |
| C1  | C1  | 0.056091307625   |
| C2  | C1  | 0.013209192511   |
| C3  | C1  | 0.0059383784221  |
| C4  | C1  | 0.0010229195339  |
| C5  | C1  | 0.0012714184866  |
| C6  | C1  | 0.0053532977892  |
| C7  | C1  | 0.0038038324111  |
| C8  | C1  | 0.064229953713   |
| C9  | C1  | 1.69993387       |
| C1  | C11 | 0.016648108544   |
| C2  | C11 | 0.060280349294   |
| C3  | C11 | 0.035268228442   |
| C4  | C11 | 0.0034850362869  |
| C5  | C11 | 0.005351442287   |
| C6  | C11 | 0.0014916831597  |
| C7  | C11 | 0.0022152598704  |
| C8  | C11 | 0.015824808587   |
| C9  | C11 | 0.066292926577   |
| C1  | C11 | 1.0957925609     |
| C1  | C12 | 0.06292147349    |
| C2  | C12 | 1.0366233136     |
| C3  | C12 | 0.069587230827   |
| C4  | C12 | 0.009276129761   |
| C5  | C12 | 0.0038034736353  |
| C6  | C12 | 0.0022158103723  |
| C7  | C12 | 0.006114852065   |
| C8  | C12 | 0.018697014457   |
| C9  | C12 | 0.060271835327   |
| C1  | C12 | 0.066908534271   |
| C11 | C12 | 1.7236642794     |
| C1  | H13 | 0.010334476005   |
| C2  | H13 | 0.062577961785   |
| C3  | H13 | 0.96309801017    |
| C4  | H13 | 0.041170301308   |
| C5  | H13 | 0.0090073744117  |
| C6  | H13 | 0.00089699079606 |
| C7  | H13 | 0.0012995511797  |
| C8  | H13 | 0.0029087610908  |
| C9  | H13 | 0.00063057244905 |
| C1  | H13 | 0.00058248930098 |
| C11 | H13 | 0.0035538343352  |
| C12 | H13 | 0.016793516692   |

|     |     |                  |
|-----|-----|------------------|
| C1  | H14 | 0.00078813236551 |
| C2  | H14 | 0.0088172239081  |
| C3  | H14 | 0.041028878094   |
| C4  | H14 | 0.97098864309    |
| C5  | H14 | 0.063581498322   |
| C6  | H14 | 0.010196686503   |
| C7  | H14 | 0.0039108215667  |
| C8  | H14 | 0.00052618966444 |
| C9  | H14 | 6.9214321261e-05 |
| C1  | H14 | 0.00010067531334 |
| C11 | H14 | 0.00031163842718 |
| C12 | H14 | 0.0010704136957  |
| H13 | H14 | 0.005481125248   |
| C1  | H15 | 0.00072835243416 |
| C2  | H15 | 0.0036841337303  |
| C3  | H15 | 0.010146514096   |
| C4  | H15 | 0.063898863407   |
| C5  | H15 | 0.97303091954    |
| C6  | H15 | 0.04079010091    |
| C7  | H15 | 0.0087455390108  |
| C8  | H15 | 0.00052252674893 |
| C9  | H15 | 9.0325688247e-05 |
| C1  | H15 | 0.00011012326895 |
| C11 | H15 | 0.0004204931602  |
| C12 | H15 | 0.00039672099152 |
| H13 | H15 | 0.001275882865   |
| H14 | H15 | 0.008930696061   |
| C1  | H16 | 0.010279187073   |
| C2  | H16 | 0.0012390808939  |
| C3  | H16 | 0.00088782735224 |
| C4  | H16 | 0.0088991101292  |
| C5  | H16 | 0.040580034921   |
| C6  | H16 | 0.97008961929    |
| C7  | H16 | 0.065423156762   |
| C8  | H16 | 0.002914524062   |
| C9  | H16 | 0.00041004229152 |
| C1  | H16 | 0.00039238252995 |
| C11 | H16 | 0.00011822579174 |
| C12 | H16 | 0.0002123619992  |
| H13 | H16 | 9.9115871464e-05 |
| H14 | H16 | 0.0013359470719  |
| H15 | H16 | 0.0051476462292  |
| C1  | H17 | 0.039792490172   |
| C2  | H17 | 0.005455724804   |
| C3  | H17 | 0.0015549884045  |
| C4  | H17 | 0.0037234055886  |
| C5  | H17 | 0.010280843755   |
| C6  | H17 | 0.062955015894   |

|     |     |                  |
|-----|-----|------------------|
| C7  | H17 | 0.96497543221    |
| C8  | H17 | 0.01362010983    |
| C9  | H17 | 0.00088152897496 |
| C1  | H17 | 0.0013777453556  |
| C11 | H17 | 0.0002057458217  |
| C12 | H17 | 0.00087015603425 |
| H13 | H17 | 0.00015368285096 |
| H14 | H17 | 0.00035603232876 |
| H15 | H17 | 0.0013229033449  |
| H16 | H17 | 0.0089381072145  |
| C1  | H18 | 0.0625843729     |
| C2  | H18 | 0.010329315194   |
| C3  | H18 | 0.0029081644028  |
| C4  | H18 | 0.00063067656047 |
| C5  | H18 | 0.00058245385448 |
| C6  | H18 | 0.0035543752215  |
| C7  | H18 | 0.016764716677   |
| C8  | H18 | 0.96316752156    |
| C9  | H18 | 0.041170703565   |
| C1  | H18 | 0.0090070381118  |
| C11 | H18 | 0.00089693144198 |
| C12 | H18 | 0.0012998779768  |
| H13 | H18 | 0.00050455288334 |
| H14 | H18 | 4.3742638847e-05 |
| H15 | H18 | 7.8006978369e-05 |
| H16 | H18 | 0.00030485638212 |
| H17 | H18 | 0.0061002854893  |
| C1  | H19 | 0.0088161703446  |
| C2  | H19 | 0.0007870528673  |
| C3  | H19 | 0.00052601265553 |
| C4  | H19 | 6.9247415085e-05 |
| C5  | H19 | 0.00010066385639 |
| C6  | H19 | 0.00031176867982 |
| C7  | H19 | 0.0010704352321  |
| C8  | H19 | 0.041028985268   |
| C9  | H19 | 0.9710329486     |
| C1  | H19 | 0.063559760055   |
| C11 | H19 | 0.010195112541   |
| C12 | H19 | 0.0039114026     |
| H13 | H19 | 4.3744307904e-05 |
| H14 | H19 | 4.0131986424e-06 |
| H15 | H19 | 7.7471060032e-06 |
| H16 | H19 | 8.145909332e-05  |
| H17 | H19 | 6.0625345174e-05 |
| H18 | H19 | 0.0054810594274  |
| C1  | C2  | 0.0036835212154  |
| C2  | C2  | 0.00072738189712 |
| C3  | C2  | 0.00052226833349 |



|     |     |                  |
|-----|-----|------------------|
| C4  | C2  | 9.0345561876e-05 |
| C5  | C2  | 0.00011011518876 |
| C6  | C2  | 0.00042062406914 |
| C7  | C2  | 0.00039662918835 |
| C8  | C2  | 0.010148858732   |
| C9  | C2  | 0.063909308113   |
| C1  | C2  | 0.97293517445    |
| C11 | C2  | 0.040772150534   |
| C12 | C2  | 0.0087462359469  |
| H13 | C2  | 7.8005938121e-05 |
| H14 | C2  | 7.7472137568e-06 |
| H15 | C2  | 1.0794321699e-05 |
| H16 | C2  | 2.9542106506e-05 |
| H17 | C2  | 0.00010688112596 |
| H18 | C2  | 0.0012758800281  |
| H19 | C2  | 0.0089306573913  |
| C1  | H21 | 0.0012401073912  |
| C2  | H21 | 0.010273681408   |
| C3  | H21 | 0.0029141385882  |
| C4  | H21 | 0.00041007846151 |
| C5  | H21 | 0.00039239165592 |
| C6  | H21 | 0.00011825855993 |
| C7  | H21 | 0.0002123253266  |
| C8  | H21 | 0.00088788454193 |
| C9  | H21 | 0.008897817136   |
| C1  | H21 | 0.040574829908   |
| C11 | H21 | 0.96998200378    |
| C12 | H21 | 0.065432463493   |
| H13 | H21 | 0.00030486008192 |
| H14 | H21 | 8.1459157194e-05 |
| H15 | H21 | 2.9541760792e-05 |
| H16 | H21 | 8.1185883485e-06 |
| H17 | H21 | 4.0932517728e-05 |
| H18 | H21 | 9.9113924889e-05 |
| H19 | H21 | 0.0013359491477  |
| C2  | H21 | 0.0051477929372  |
| C1  | H22 | 0.0054577147068  |
| C2  | H22 | 0.039797325892   |
| C3  | H22 | 0.013604209998   |
| C4  | H22 | 0.00088145260455 |
| C5  | H22 | 0.0013777266113  |
| C6  | H22 | 0.00020586251717 |
| C7  | H22 | 0.00087034073071 |
| C8  | H22 | 0.0015558485308  |
| C9  | H22 | 0.0037227471551  |
| C1  | H22 | 0.010280600379   |
| C11 | H22 | 0.062936916516   |
| C12 | H22 | 0.96504633905    |

|     |     |                  |
|-----|-----|------------------|
| H13 | H22 | 0.0060998930351  |
| H14 | H22 | 6.0625111083e-05 |
| H15 | H22 | 0.00010688017388 |
| H16 | H22 | 4.0932444148e-05 |
| H17 | H22 | 0.00013740384608 |
| H18 | H22 | 0.00015368213609 |
| H19 | H22 | 0.00035603485156 |
| C2  | H22 | 0.0013229072654  |
| H21 | H22 | 0.0089381479911  |

## (16)ANNULENE

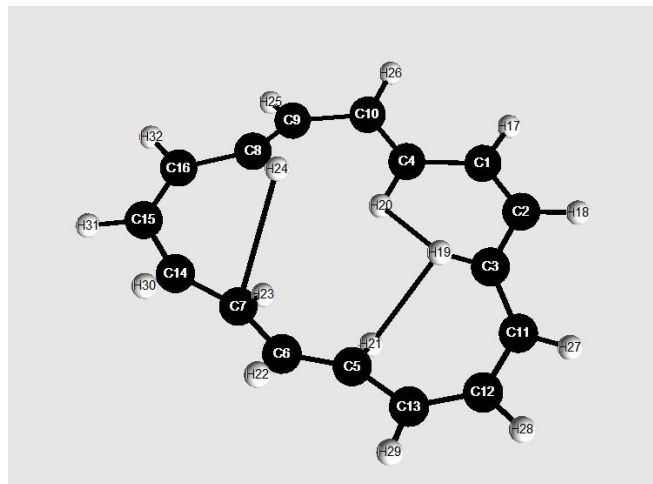

### HARTREE-FOCK

| Atom A | Atom B | Delocalization index |
|--------|--------|----------------------|
| C1     | C2     | 1.7142170393         |
| C1     | C3     | 0.065977319201       |
| C2     | C3     | 1.0781737076         |
| C1     | C4     | 1.0936463925         |
| C2     | C4     | 0.067659860767       |
| C3     | C4     | 0.016496252175       |
| C1     | C5     | 0.00058491442958     |
| C2     | C5     | 0.0011506338743      |
| C3     | C5     | 0.019312225113       |
| C4     | C5     | 0.0008850048696      |
| C1     | C6     | 0.00090904430418     |
| C2     | C6     | 0.00065154749485     |
| C3     | C6     | 0.0089181865584      |
| C4     | C6     | 0.0003096612536      |
| C5     | C6     | 1.7124027552         |
| C1     | C7     | 0.00019839445723     |
| C2     | C7     | 0.00025854607966     |
| C3     | C7     | 0.00069314924953     |
| C4     | C7     | 0.0015094608398      |
| C5     | C7     | 0.07414914989        |
| C6     | C7     | 1.0906783119         |
| C1     | C8     | 0.0043367876967      |
| C2     | C8     | 0.0086018695845      |
| C3     | C8     | 0.0005371429412      |
| C4     | C8     | 0.055938026968       |
| C5     | C8     | 0.00061834316257     |
| C6     | C8     | 0.0011793398696      |
| C7     | C8     | 0.019454901738       |
| C1     | C9     | 0.0099618179053      |
| C2     | C9     | 0.0043120679133      |

|     |     |                  |
|-----|-----|------------------|
| C3  | C9  | 0.00028591225464 |
| C4  | C9  | 0.067815377035   |
| C5  | C9  | 0.0010706230507  |
| C6  | C9  | 0.00050922873076 |
| C7  | C9  | 0.0075931514862  |
| C8  | C9  | 1.7203729606     |
| C1  | C1  | 0.067664287731   |
| C2  | C1  | 0.060633173861   |
| C3  | C1  | 0.004049396602   |
| C4  | C1  | 1.7137155581     |
| C5  | C1  | 0.00027249603672 |
| C6  | C1  | 0.00019972926653 |
| C7  | C1  | 0.0006559602346  |
| C8  | C1  | 0.067421795195   |
| C9  | C1  | 1.074068918      |
| C1  | C11 | 0.051444200552   |
| C2  | C11 | 0.06713254247    |
| C3  | C11 | 1.7214127791     |
| C4  | C11 | 0.0039293078448  |
| C5  | C11 | 0.013731949164   |
| C6  | C11 | 0.0037665870674  |
| C7  | C11 | 0.00030004273224 |
| C8  | C11 | 0.0012893066156  |
| C9  | C11 | 0.00052793105115 |
| C1  | C11 | 0.0072052248101  |
| C1  | C12 | 0.0038227605381  |
| C2  | C12 | 0.0096140632772  |
| C3  | C12 | 0.067194209303   |
| C4  | C12 | 0.00028911584342 |
| C5  | C12 | 0.065359219134   |
| C6  | C12 | 0.050046171767   |
| C7  | C12 | 0.0040367344259  |
| C8  | C12 | 0.00018130091902 |
| C9  | C12 | 0.00020556812767 |
| C1  | C12 | 0.00056181346942 |
| C11 | C12 | 1.0726449349     |
| C1  | C13 | 0.0065190141855  |
| C2  | C13 | 0.0035181750298  |
| C3  | C13 | 0.047837512261   |
| C4  | C13 | 0.00050484143196 |
| C5  | C13 | 1.0796644672     |
| C6  | C13 | 0.066501149435   |
| C7  | C13 | 0.009992419996   |
| C8  | C13 | 0.0002396440364  |
| C9  | C13 | 0.00015998118849 |
| C1  | C13 | 0.0011596790328  |
| C11 | C13 | 0.062291459712   |
| C12 | C13 | 1.7283035999     |

|     |     |                  |
|-----|-----|------------------|
| C1  | C14 | 0.00024389137075 |
| C2  | C14 | 0.00023110102748 |
| C3  | C14 | 0.0016011252387  |
| C4  | C14 | 0.00061685306111 |
| C5  | C14 | 0.060273058565   |
| C6  | C14 | 0.067598465208   |
| C7  | C14 | 1.7169787516     |
| C8  | C14 | 0.016834843102   |
| C9  | C14 | 0.0044192796637  |
| C1  | C14 | 0.00032847724818 |
| C11 | C14 | 0.00063813157628 |
| C12 | C14 | 0.0090275290608  |
| C13 | C14 | 0.0046341784315  |
| C1  | C15 | 0.00062425534854 |
| C2  | C15 | 0.0018229971891  |
| C3  | C15 | 0.0002034793519  |
| C4  | C15 | 0.0074405632827  |
| C5  | C15 | 0.0041565333832  |
| C6  | C15 | 0.0096540515031  |
| C7  | C15 | 0.067228335553   |
| C8  | C15 | 0.065633619364   |
| C9  | C15 | 0.055188476622   |
| C1  | C15 | 0.0039964698429  |
| C11 | C15 | 0.00031182381596 |
| C12 | C15 | 0.00061198453032 |
| C13 | C15 | 0.00040796707109 |
| C14 | C15 | 1.0641811302     |
| C1  | C16 | 0.00033914831622 |
| C2  | C16 | 0.00067720050821 |
| C3  | C16 | 0.00021867025629 |
| C4  | C16 | 0.0040570666307  |
| C5  | C16 | 0.0057350889725  |
| C6  | C16 | 0.0032694230822  |
| C7  | C16 | 0.041855500661   |
| C8  | C16 | 1.0814500338     |
| C9  | C16 | 0.067795683025   |
| C1  | C16 | 0.0099552137337  |
| C11 | C16 | 0.00017666446267 |
| C12 | C16 | 0.0011367252706  |
| C13 | C16 | 0.00047509168211 |
| C14 | C16 | 0.063098102309   |
| C15 | C16 | 1.7309073747     |
| C1  | H17 | 0.96882301551    |
| C2  | H17 | 0.061297744597   |
| C3  | H17 | 0.0098704109129  |
| C4  | H17 | 0.039734379953   |
| C5  | H17 | 6.0565301058e-05 |
| C6  | H17 | 7.8002530356e-05 |

|     |     |                  |
|-----|-----|------------------|
| C7  | H17 | 3.3812014787e-05 |
| C8  | H17 | 0.00045237122126 |
| C9  | H17 | 0.00067751857099 |
| C1  | H17 | 0.0081601273327  |
| C11 | H17 | 0.003572758604   |
| C12 | H17 | 0.0004246099104  |
| C13 | H17 | 0.00045588748996 |
| C14 | H17 | 1.9140215381e-05 |
| C15 | H17 | 4.2287314484e-05 |
| C16 | H17 | 5.8447260166e-05 |
| C1  | H18 | 0.061610753064   |
| C2  | H18 | 0.96969777315    |
| C3  | H18 | 0.039783383628   |
| C4  | H18 | 0.0098967465466  |
| C5  | H18 | 0.00031330168398 |
| C6  | H18 | 0.00027220113297 |
| C7  | H18 | 3.1819815415e-05 |
| C8  | H18 | 0.00058364309505 |
| C9  | H18 | 0.00045416187139 |
| C1  | H18 | 0.0042545150903  |
| C11 | H18 | 0.0094682639026  |
| C12 | H18 | 0.00071044075399 |
| C13 | H18 | 0.00042477434944 |
| C14 | H18 | 5.5087683543e-05 |
| C15 | H18 | 0.0001283854767  |
| C16 | H18 | 5.0447057373e-05 |
| H17 | H18 | 0.0078132786973  |
| C1  | H19 | 0.0075028342639  |
| C2  | H19 | 0.036797363464   |
| C3  | H19 | 0.93741154912    |
| C4  | H19 | 0.012426517089   |
| C5  | H19 | 0.020619312435   |
| C6  | H19 | 0.005765857106   |
| C7  | H19 | 0.00037950519464 |
| C8  | H19 | 0.00029837977147 |
| C9  | H19 | 0.00018294117387 |
| C1  | H19 | 0.001945680404   |
| C11 | H19 | 0.056769700997   |
| C12 | H19 | 0.010885665775   |
| C13 | H19 | 0.0082047230576  |
| C14 | H19 | 0.00043110057698 |
| C15 | H19 | 5.8339333958e-05 |
| C16 | H19 | 6.5887413649e-05 |
| H17 | H19 | 0.00044675018091 |
| H18 | H19 | 0.0070105552247  |
| C1  | C2  | 0.037080604208   |
| C2  | C2  | 0.0065395489004  |
| C3  | C2  | 0.016506260633   |

|     |     |                  |
|-----|-----|------------------|
| C4  | C2  | 0.93772674642    |
| C5  | C2  | 0.0033272099133  |
| C6  | C2  | 0.0013086408403  |
| C7  | C2  | 0.0023892612974  |
| C8  | C2  | 0.016375142721   |
| C9  | C2  | 0.012750022838   |
| C1  | C2  | 0.058406297634   |
| C11 | C2  | 0.0025815259462  |
| C12 | C2  | 0.00023025106159 |
| C13 | C2  | 0.00052368298942 |
| C14 | C2  | 0.00041691935874 |
| C15 | C2  | 0.00037035698757 |
| C16 | C2  | 0.0010654317123  |
| H17 | C2  | 0.0081973649441  |
| H18 | C2  | 0.00036204426182 |
| H19 | C2  | 0.01813419486    |
| C1  | H21 | 0.00052991220035 |
| C2  | H21 | 0.0007843235655  |
| C3  | H21 | 0.019693876842   |
| C4  | H21 | 0.0020001192159  |
| C5  | H21 | 0.94208691618    |
| C6  | H21 | 0.056632117479   |
| C7  | H21 | 0.013614223645   |
| C8  | H21 | 0.00011375366653 |
| C9  | H21 | 9.7936637652e-05 |
| C1  | H21 | 0.00036263514194 |
| C11 | H21 | 0.013147331872   |
| C12 | H21 | 0.0081865436135  |
| C13 | H21 | 0.038085622879   |
| C14 | H21 | 0.0027743360251  |
| C15 | H21 | 0.00020212446039 |
| C16 | H21 | 0.00023184731871 |
| H17 | H21 | 9.1690865663e-05 |
| H18 | H21 | 0.00013153010233 |
| H19 | H21 | 0.008514709312   |
| C2  | H21 | 0.0046619800036  |
| C1  | H22 | 5.9015432953e-05 |
| C2  | H22 | 5.1595847071e-05 |
| C3  | H22 | 0.00069170031713 |
| C4  | H22 | 4.1494564119e-05 |
| C5  | H22 | 0.059343520424   |
| C6  | H22 | 0.96539434062    |
| C7  | H22 | 0.03900583112    |
| C8  | H22 | 0.00020885363923 |
| C9  | H22 | 0.0001015474164  |
| C1  | H22 | 1.9928535548e-05 |
| C11 | H22 | 0.00044029682035 |
| C12 | H22 | 0.0025167567397  |

|     |     |                  |
|-----|-----|------------------|
| C13 | H22 | 0.0097072216729  |
| C14 | H22 | 0.0076936505349  |
| C15 | H22 | 0.00067743620796 |
| C16 | H22 | 0.00032651814888 |
| H17 | H22 | 5.14769474e-06   |
| H18 | H22 | 1.6446756412e-05 |
| H19 | H22 | 0.00024110635954 |
| C2  | H22 | 0.00017521727267 |
| H21 | H22 | 0.011304840977   |
| C1  | H23 | 0.00014701111383 |
| C2  | H23 | 4.9367272875e-05 |
| C3  | H23 | 8.7964477912e-05 |
| C4  | H23 | 0.0014520918304  |
| C5  | H23 | 0.011745981212   |
| C6  | H23 | 0.038967963502   |
| C7  | H23 | 0.94384989176    |
| C8  | H23 | 0.013916327118   |
| C9  | H23 | 0.0035874155045  |
| C1  | H23 | 0.0003637655769  |
| C11 | H23 | 4.3585658209e-05 |
| C12 | H23 | 0.00027059951859 |
| C13 | H23 | 0.00090059114967 |
| C14 | H23 | 0.055983382232   |
| C15 | H23 | 0.012431067157   |
| C16 | H23 | 0.0088014986565  |
| H17 | H23 | 5.6562115432e-05 |
| H18 | H23 | 3.8834138608e-06 |
| H19 | H23 | 7.2270770686e-05 |
| C2  | H23 | 0.00314625443    |
| H21 | H23 | 0.010305766593   |
| H22 | H23 | 0.0084863641513  |
| C1  | H24 | 0.00094549789877 |
| C2  | H24 | 0.00045506273943 |
| C3  | H24 | 0.00013491156105 |
| C4  | H24 | 0.014910023743   |
| C5  | H24 | 0.00070215028039 |
| C6  | H24 | 0.0016050491142  |
| C7  | H24 | 0.022775433548   |
| C8  | H24 | 0.93555890669    |
| C9  | H24 | 0.054797399898   |
| C1  | H24 | 0.011981762372   |
| C11 | H24 | 0.0001063835456  |
| C12 | H24 | 8.02022118e-05   |
| C13 | H24 | 6.239470705e-05  |
| C14 | H24 | 0.017741675661   |
| C15 | H24 | 0.0073581710276  |
| C16 | H24 | 0.037315475807   |
| H17 | H24 | 0.00024631642131 |



|     |     |                   |
|-----|-----|-------------------|
| H18 | H24 | 3.4442991602e-05  |
| H19 | H24 | 0.00028564954068  |
| C2  | H24 | 0.014965449772    |
| H21 | H24 | 9.4747189922e-05  |
| H22 | H24 | 7.9937426383e-05  |
| H23 | H24 | 0.0056526621634   |
| C1  | H25 | 0.0012533374986   |
| C2  | H25 | 0.00093398619959  |
| C3  | H25 | 5.8518997429e-05  |
| C4  | H25 | 0.0095872535112   |
| C5  | H25 | 7.67711116876e-05 |
| C6  | H25 | 5.3842122392e-05  |
| C7  | H25 | 0.00072131424018  |
| C8  | H25 | 0.062408667035    |
| C9  | H25 | 0.97002713419     |
| C1  | H25 | 0.040000756267    |
| C11 | H25 | 0.00013139661858  |
| C12 | H25 | 2.1249076219e-05  |
| C13 | H25 | 2.4304791497e-05  |
| C14 | H25 | 0.00057377916401  |
| C15 | H25 | 0.0028866374296   |
| C16 | H25 | 0.009995870634    |
| H17 | H25 | 3.4503559325e-05  |
| H18 | H25 | 9.967310971e-05   |
| H19 | H25 | 3.5977781423e-05  |
| C2  | H25 | 0.00084063637959  |
| H21 | H25 | 8.3997228004e-06  |
| H22 | H25 | 6.1105660275e-06  |
| H23 | H25 | 0.00016448804483  |
| H24 | H25 | 0.011347065537    |
| C1  | H26 | 0.009423331859    |
| C2  | H26 | 0.0030799149726   |
| C3  | H26 | 0.00050399405764  |
| C4  | H26 | 0.061877951806    |
| C5  | H26 | 5.0038320082e-05  |
| C6  | H26 | 2.5714833638e-05  |
| C7  | H26 | 0.00017910473855  |
| C8  | H26 | 0.0087388462026   |
| C9  | H26 | 0.038854420744    |
| C1  | H26 | 0.97053723969     |
| C11 | H26 | 0.00044265430248  |
| C12 | H26 | 3.7472151848e-05  |
| C13 | H26 | 6.8255252168e-05  |
| C14 | H26 | 7.7373392017e-05  |
| C15 | H26 | 0.00084242982374  |
| C16 | H26 | 0.0012251681938   |
| H17 | H26 | 0.0054583362876   |
| H18 | H26 | 0.00020750332956  |

|     |     |                  |
|-----|-----|------------------|
| H19 | H26 | 0.00035067329495 |
| C2  | H26 | 0.011265850621   |
| H21 | H26 | 0.00011037025138 |
| H22 | H26 | 4.2187290691e-06 |
| H23 | H26 | 0.000123184572   |
| H24 | H26 | 0.0007287215181  |
| H25 | H26 | 0.0035065518108  |
| C1  | H27 | 0.0027255307147  |
| C2  | H27 | 0.010352399916   |
| C3  | H27 | 0.062081111285   |
| C4  | H27 | 0.00044038380364 |
| C5  | H27 | 0.00084162070108 |
| C6  | H27 | 0.0010646300391  |
| C7  | H27 | 7.7193452585e-05 |
| C8  | H27 | 7.8666370286e-05 |
| C9  | H27 | 3.6744807373e-05 |
| C1  | H27 | 0.00042517158977 |
| C11 | H27 | 0.96823567068    |
| C12 | H27 | 0.040059108295   |
| C13 | H27 | 0.0097957563076  |
| C14 | H27 | 0.00021246952299 |
| C15 | H27 | 2.9820525932e-05 |
| C16 | H27 | 3.2824071821e-05 |
| H17 | H27 | 0.00019409054709 |
| H18 | H27 | 0.0050741453386  |
| H19 | H27 | 0.011379885882   |
| C2  | H27 | 0.00034787542461 |
| H21 | H27 | 0.00039800846226 |
| H22 | H27 | 5.5568186459e-05 |
| H23 | H27 | 3.9545619037e-06 |
| H24 | H27 | 1.1470295567e-05 |
| H25 | H27 | 7.0957488053e-06 |
| H26 | H27 | 3.2288052987e-05 |
| C1  | H28 | 0.0010861608158  |
| C2  | H28 | 0.0013071349799  |
| C3  | H28 | 0.010591177435   |
| C4  | H28 | 7.4153052043e-05 |
| C5  | H28 | 0.010122773242   |
| C6  | H28 | 0.0036876869662  |
| C7  | H28 | 0.00043687365869 |
| C8  | H28 | 4.0475734069e-05 |
| C9  | H28 | 2.6457894412e-05 |
| C1  | H28 | 0.00019552632011 |
| C11 | H28 | 0.040478074951   |
| C12 | H28 | 0.97112205456    |
| C13 | H28 | 0.064902191309   |
| C14 | H28 | 0.00064109029666 |
| C15 | H28 | 5.3095739876e-05 |

|     |     |                  |
|-----|-----|------------------|
| C16 | H28 | 8.0693219236e-05 |
| H17 | H28 | 9.5857251024e-05 |
| H18 | H28 | 8.5729472499e-05 |
| H19 | H28 | 0.00061231124146 |
| C2  | H28 | 2.9082788244e-05 |
| H21 | H28 | 0.00046434817105 |
| H22 | H28 | 0.00018704237089 |
| H23 | H28 | 2.5459478897e-05 |
| H24 | H28 | 7.2872225924e-06 |
| H25 | H28 | 4.5629236584e-06 |
| H26 | H28 | 1.0852853588e-05 |
| H27 | H28 | 0.0037349434032  |
| C1  | H29 | 0.00044740382629 |
| C2  | H29 | 0.00029328413297 |
| C3  | H29 | 0.003026240156   |
| C4  | H29 | 5.3506718968e-05 |
| C5  | H29 | 0.039959434656   |
| C6  | H29 | 0.0094636016386  |
| C7  | H29 | 0.0008078504955  |
| C8  | H29 | 2.5977587294e-05 |
| C9  | H29 | 2.3733792001e-05 |
| C1  | H29 | 7.9766340804e-05 |
| C11 | H29 | 0.009978554657   |
| C12 | H29 | 0.063354391032   |
| C13 | H29 | 0.96743419584    |
| C14 | H29 | 0.00074351374784 |
| C15 | H29 | 5.4366026635e-05 |
| C16 | H29 | 8.1240058661e-05 |
| H17 | H29 | 3.0694088107e-05 |
| H18 | H29 | 4.3130418917e-05 |
| H19 | H29 | 0.00039112090985 |
| C2  | H29 | 0.00011457924554 |
| H21 | H29 | 0.0072853045098  |
| H22 | H29 | 0.0045318677441  |
| H23 | H29 | 0.00026399805803 |
| H24 | H29 | 9.5455857721e-06 |
| H25 | H29 | 2.5623876673e-06 |
| H26 | H29 | 5.0959648406e-06 |
| H27 | H29 | 0.0012094871524  |
| H28 | H29 | 0.0088121480156  |
| C1  | C3  | 2.7633073657e-05 |
| C2  | C3  | 5.6071296503e-05 |
| C3  | C3  | 8.6909056751e-05 |
| C4  | C3  | 0.00021692293318 |
| C5  | C3  | 0.0031830475016  |
| C6  | C3  | 0.010105054722   |
| C7  | C3  | 0.062370489891   |
| C8  | C3  | 0.00099408655654 |

|     |     |                  |
|-----|-----|------------------|
| C9  | C3  | 0.0014093275303  |
| C1  | C3  | 9.6506714879e-05 |
| C11 | C3  | 4.2567244799e-05 |
| C12 | C3  | 0.00043780701833 |
| C13 | C3  | 0.00021354661776 |
| C14 | C3  | 0.96814931903    |
| C15 | C3  | 0.03984387373    |
| C16 | C3  | 0.011598775928   |
| H17 | C3  | 2.8854397154e-06 |
| H18 | C3  | 5.7929151911e-06 |
| H19 | C3  | 2.1701071645e-05 |
| C2  | C3  | 8.2923148211e-05 |
| H21 | C3  | 0.00044810114364 |
| H22 | C3  | 0.005800654452   |
| H23 | C3  | 0.011623360074   |
| H24 | C3  | 0.00047805286747 |
| H25 | C3  | 8.2335732044e-05 |
| H26 | C3  | 2.731519686e-05  |
| H27 | C3  | 1.1230852104e-05 |
| H28 | C3  | 2.8704666141e-05 |
| H29 | C3  | 4.8678333189e-05 |
| C1  | H31 | 4.8581051269e-05 |
| C2  | H31 | 0.00013673205904 |
| C3  | H31 | 4.9569260346e-05 |
| C4  | H31 | 0.00053280092963 |
| C5  | H31 | 0.0015687552477  |
| C6  | H31 | 0.0013556827601  |
| C7  | H31 | 0.011705519093   |
| C8  | H31 | 0.0099901992534  |
| C9  | H31 | 0.0040049967574  |
| C1  | H31 | 0.00045447739025 |
| C11 | H31 | 3.5541586284e-05 |
| C12 | H31 | 0.00024803138151 |
| C13 | H31 | 0.00011928487526 |
| C14 | H31 | 0.040030591149   |
| C15 | H31 | 0.97174465074    |
| C16 | H31 | 0.064400435566   |
| H17 | H31 | 4.2821244113e-06 |
| H18 | H31 | 1.0521950642e-05 |
| H19 | H31 | 1.3833505003e-05 |
| C2  | H31 | 3.081281555e-05  |
| H21 | H31 | 6.190878137e-05  |
| H22 | H31 | 4.083586199e-05  |
| H23 | H31 | 0.00069224492732 |
| H24 | H31 | 0.0004169022441  |
| H25 | H31 | 0.00020953916829 |
| H26 | H31 | 9.5804213476e-05 |
| H27 | H31 | 7.2654275068e-06 |

|     |     |                  |
|-----|-----|------------------|
| H28 | H31 | 1.9166645644e-05 |
| H29 | H31 | 2.1542228418e-05 |
| C3  | H31 | 0.0026048587152  |
| C1  | H32 | 6.7012387414e-05 |
| C2  | H32 | 6.5516599818e-05 |
| C3  | H32 | 1.8598790475e-05 |
| C4  | H32 | 0.00054432978084 |
| C5  | H32 | 0.00043088207842 |
| C6  | H32 | 0.00031931858    |
| C7  | H32 | 0.0027538005138  |
| C8  | H32 | 0.039616184846   |
| C9  | H32 | 0.0089967241963  |
| C1  | H32 | 0.00070273656287 |
| C11 | H32 | 1.3286167178e-05 |
| C12 | H32 | 8.7038022293e-05 |
| C13 | H32 | 3.6872731397e-05 |
| C14 | H32 | 0.010002537235   |
| C15 | H32 | 0.062899824708   |
| C16 | H32 | 0.96784729424    |
| H17 | H32 | 6.0081650449e-06 |
| H18 | H32 | 5.8104437039e-06 |
| H19 | H32 | 9.9951909229e-06 |
| C2  | H32 | 0.00029209876259 |
| H21 | H32 | 1.5788477969e-05 |
| H22 | H32 | 3.7891670505e-05 |
| H23 | H32 | 0.00037709932752 |
| H24 | H32 | 0.0076403520083  |
| H25 | H32 | 0.0052633187077  |
| H26 | H32 | 4.4133777687e-05 |
| H27 | H32 | 2.5460304642e-06 |
| H28 | H32 | 5.8160617698e-06 |
| H29 | H32 | 5.6638021342e-06 |
| C3  | H32 | 0.0012713647346  |
| H31 | H32 | 0.0083667121494  |

## AZULENE

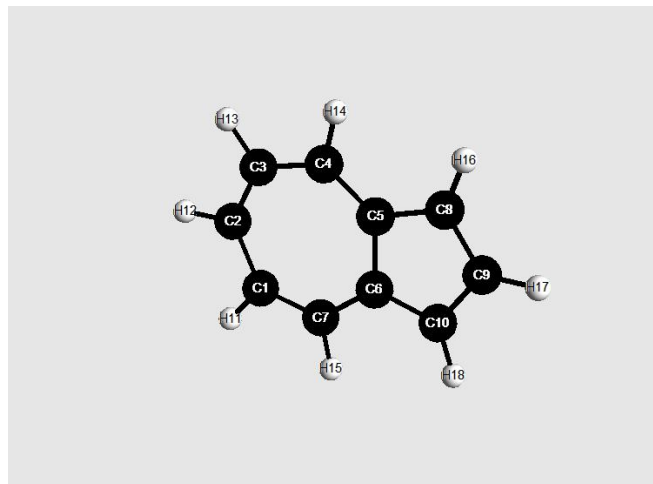

### HARTREE-FOCK

| Atom A | Atom B | Delocalization index |
|--------|--------|----------------------|
| C1     | C2     | 1.2216269626         |
| C1     | C3     | 0.062556426733       |
| C2     | C3     | 1.5411801858         |
| C1     | C4     | 0.031733653362       |
| C2     | C4     | 0.071168828762       |
| C3     | C4     | 1.2230878803         |
| C1     | C5     | 0.011226283639       |
| C2     | C5     | 0.057543270114       |
| C3     | C5     | 0.059776773726       |
| C4     | C5     | 1.5057236313         |
| C1     | C6     | 0.06035787148        |
| C2     | C6     | 0.028919014474       |
| C3     | C6     | 0.011045411761       |
| C4     | C6     | 0.074777978158       |
| C5     | C6     | 1.0396626791         |
| C1     | C7     | 1.5410687194         |
| C2     | C7     | 0.070440949922       |
| C3     | C7     | 0.062661588439       |
| C4     | C7     | 0.014960458732       |
| C5     | C7     | 0.065585216089       |
| C6     | C7     | 1.2128042146         |
| C1     | C8     | 0.025170385957       |
| C2     | C8     | 0.007224861235       |
| C3     | C8     | 0.029618322969       |
| C4     | C8     | 0.071602468193       |
| C5     | C8     | 1.1822432976         |
| C6     | C8     | 0.10652799529        |
| C7     | C8     | 0.01658243619        |
| C1     | C9     | 0.0082533623174      |
| C2     | C9     | 0.023830571637       |

|     |     |                  |
|-----|-----|------------------|
| C3  | C9  | 0.0079324365472  |
| C4  | C9  | 0.05982061775    |
| C5  | C9  | 0.084318877725   |
| C6  | C9  | 0.082757071486   |
| C7  | C9  | 0.03094639224    |
| C8  | C9  | 1.5295531825     |
| C1  | C1  | 0.05849870575    |
| C2  | C1  | 0.01020802404    |
| C3  | C1  | 0.023332458591   |
| C4  | C1  | 0.035964587009   |
| C5  | C1  | 0.085757038356   |
| C6  | C1  | 1.477514497      |
| C7  | C1  | 0.067018577103   |
| C8  | C1  | 0.085030180655   |
| C9  | C1  | 1.2163452057     |
| C1  | H11 | 0.97319035321    |
| C2  | H11 | 0.046345306655   |
| C3  | H11 | 0.0079083880544  |
| C4  | H11 | 0.0018786371502  |
| C5  | H11 | 0.00052433163696 |
| C6  | H11 | 0.0092941842208  |
| C7  | H11 | 0.058970148452   |
| C8  | H11 | 0.0019662438692  |
| C9  | H11 | 0.00061296357034 |
| C1  | H11 | 0.0044180097969  |
| C1  | H12 | 0.044413278958   |
| C2  | H12 | 0.96772294423    |
| C3  | H12 | 0.057311659092   |
| C4  | H12 | 0.0094518237195  |
| C5  | H12 | 0.0035646002932  |
| C6  | H12 | 0.0016564601123  |
| C7  | H12 | 0.0077957762616  |
| C8  | H12 | 0.00043335461614 |
| C9  | H12 | 0.0016059024139  |
| C1  | H12 | 0.00065371712747 |
| H11 | H12 | 0.0075135385349  |
| C1  | H13 | 0.0094271976588  |
| C2  | H13 | 0.058644649976   |
| C3  | H13 | 0.972578555      |
| C4  | H13 | 0.046164953502   |
| C5  | H13 | 0.0076193825861  |
| C6  | H13 | 0.00053924507067 |
| C7  | H13 | 0.0039888670282  |
| C8  | H13 | 0.0024522551804  |
| C9  | H13 | 0.00046338950838 |
| C1  | H13 | 0.0018514976267  |
| H11 | H13 | 0.0011540693788  |
| H12 | H13 | 0.0091233999926  |

|     |     |                  |
|-----|-----|------------------|
| C1  | H14 | 0.0014752374372  |
| C2  | H14 | 0.0075647150982  |
| C3  | H14 | 0.042605775761   |
| C4  | H14 | 0.96165441393    |
| C5  | H14 | 0.054184976874   |
| C6  | H14 | 0.010294491712   |
| C7  | H14 | 0.00069658212938 |
| C8  | H14 | 0.012203761535   |
| C9  | H14 | 0.0030060149211  |
| C1  | H14 | 0.0029575013969  |
| H11 | H14 | 0.00013671168811 |
| H12 | H14 | 0.0011433418648  |
| H13 | H14 | 0.0070973267301  |
| C1  | H15 | 0.053929078543   |
| C2  | H15 | 0.0090905316383  |
| C3  | H15 | 0.0032773291062  |
| C4  | H15 | 0.00078588630319 |
| C5  | H15 | 0.0092395418938  |
| C6  | H15 | 0.043896295659   |
| C7  | H15 | 0.9610563803     |
| C8  | H15 | 0.0016736090939  |
| C9  | H15 | 0.001709845945   |
| C1  | H15 | 0.010535107688   |
| H11 | H15 | 0.0087727572842  |
| H12 | H15 | 0.0011339798516  |
| H13 | H15 | 0.0002991667184  |
| H14 | H15 | 0.00016003846069 |
| C1  | H16 | 0.0018221126604  |
| C2  | H16 | 0.00037595752535 |
| C3  | H16 | 0.0016423436936  |
| C4  | H16 | 0.0061718642348  |
| C5  | H16 | 0.041847370252   |
| C6  | H16 | 0.012066381576   |
| C7  | H16 | 0.0017407653015  |
| C8  | H16 | 0.98391012904    |
| C9  | H16 | 0.050866024362   |
| C1  | H16 | 0.010620769919   |
| H11 | H16 | 0.00013775478915 |
| H12 | H16 | 3.0667300214e-05 |
| H13 | H16 | 0.00012207577252 |
| H14 | H16 | 0.0051592788957  |
| H15 | H16 | 0.00041924625811 |
| C1  | H17 | 0.00054622615389 |
| C2  | H17 | 0.001510906699   |
| C3  | H17 | 0.00059726259283 |
| C4  | H17 | 0.0043235000426  |
| C5  | H17 | 0.0097451150176  |
| C6  | H17 | 0.0080698310352  |



|     |     |                  |
|-----|-----|------------------|
| C7  | H17 | 0.0025112330379  |
| C8  | H17 | 0.051912617801   |
| C9  | H17 | 0.982769331      |
| C1  | H17 | 0.040142059414   |
| H11 | H17 | 7.9511968486e-05 |
| H12 | H17 | 9.7318808841e-05 |
| H13 | H17 | 7.5317559379e-05 |
| H14 | H17 | 0.00018276966143 |
| H15 | H17 | 8.8390840081e-05 |
| H16 | H17 | 0.0036733512583  |
| C1  | H18 | 0.0032297707424  |
| C2  | H18 | 0.00069717591357 |
| C3  | H18 | 0.0016370372827  |
| C4  | H18 | 0.0028876926313  |
| C5  | H18 | 0.011049674886   |
| C6  | H18 | 0.052762972706   |
| C7  | H18 | 0.0068634721524  |
| C8  | H18 | 0.0088299800154  |
| C9  | H18 | 0.040082634578   |
| C1  | H18 | 0.98503479745    |
| H11 | H18 | 0.00023311926581 |
| H12 | H18 | 5.1811296408e-05 |
| H13 | H18 | 0.00012564955508 |
| H14 | H18 | 0.00050406736633 |
| H15 | H18 | 0.005096858861   |
| H16 | H18 | 0.0015421754798  |
| H17 | H18 | 0.0025459041952  |

## PHENOL

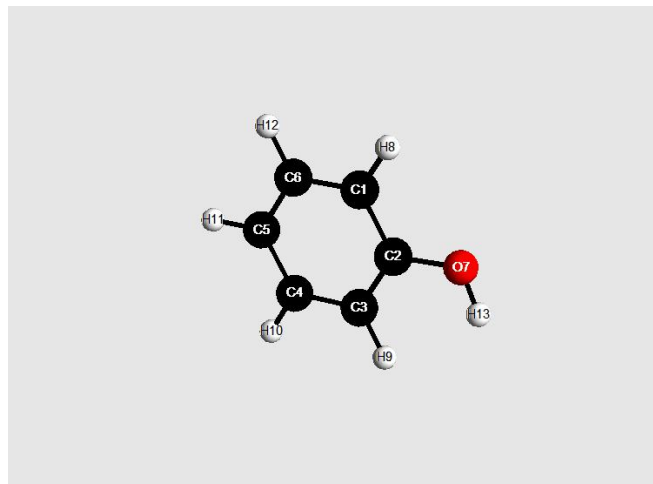

### HARTREE-FOCK

| Atom A | Atom B | Delocalization index |
|--------|--------|----------------------|
| C1     | C2     | 1.3006053106         |
| C1     | C3     | 0.064437262545       |
| C2     | C3     | 1.3238226216         |
| C1     | C4     | 0.096746679705       |
| C2     | C4     | 0.073982016181       |
| C3     | C4     | 1.37948224           |
| C1     | C5     | 0.07169802364        |
| C2     | C5     | 0.086201077554       |
| C3     | C5     | 0.07307851911        |
| C4     | C5     | 1.3965687842         |
| C1     | C6     | 1.4027778563         |
| C2     | C6     | 0.0769094158         |
| C3     | C6     | 0.095230504032       |
| C4     | C6     | 0.078170695556       |
| C5     | C6     | 1.3736325488         |
| C1     | O7     | 0.10871468292        |
| C2     | O7     | 0.82934322519        |
| C3     | O7     | 0.11548893636        |
| C4     | O7     | 0.014763765228       |
| C5     | O7     | 0.019291838686       |
| C6     | O7     | 0.013497668925       |
| C1     | H8     | 0.96929978243        |
| C2     | H8     | 0.046653202322       |
| C3     | H8     | 0.0067760136553      |
| C4     | H8     | 0.0058621543836      |
| C5     | H8     | 0.0083397498972      |
| C6     | H8     | 0.046748256288       |
| O7     | H8     | 0.015582832022       |
| C1     | H9     | 0.0071954946387      |
| C2     | H9     | 0.050183852254       |

|     |     |                  |
|-----|-----|------------------|
| C3  | H9  | 0.97519725986    |
| C4  | H9  | 0.048215091098   |
| C5  | H9  | 0.0086286267616  |
| C6  | H9  | 0.0063842734218  |
| O7  | H9  | 0.016062954566   |
| H8  | H9  | 0.0016812343305  |
| C1  | C1  | 0.0061675146528  |
| C2  | C1  | 0.0083680207048  |
| C3  | C1  | 0.049309753527   |
| C4  | C1  | 0.97476407272    |
| C5  | C1  | 0.048387115805   |
| C6  | C1  | 0.0088123846044  |
| O7  | C1  | 0.0017518035468  |
| H8  | C1  | 0.00036136299683 |
| H9  | C1  | 0.0059254862402  |
| C1  | H11 | 0.0087407222452  |
| C2  | H11 | 0.0057242628328  |
| C3  | H11 | 0.0089950014374  |
| C4  | H11 | 0.050559949753   |
| C5  | H11 | 0.97978547576    |
| C6  | H11 | 0.049344031079   |
| O7  | H11 | 0.0015405403634  |
| H8  | H11 | 0.0012877352499  |
| H9  | H11 | 0.0013352055903  |
| C1  | H11 | 0.0056382323041  |
| C1  | H12 | 0.049791724847   |
| C2  | H12 | 0.0085122450623  |
| C3  | H12 | 0.0060086964215  |
| C4  | H12 | 0.008711461752   |
| C5  | H12 | 0.047727469821   |
| C6  | H12 | 0.9745729193     |
| O7  | H12 | 0.001444100565   |
| H8  | H12 | 0.0057919646987  |
| H9  | H12 | 0.00039424106661 |
| C1  | H12 | 0.0014742851302  |
| H11 | H12 | 0.0055263722898  |
| C1  | H13 | 0.0055910310317  |
| C2  | H13 | 0.010171815601   |
| C3  | H13 | 0.0049647361614  |
| C4  | H13 | 0.00041755850127 |
| C5  | H13 | 0.00026019500977 |
| C6  | H13 | 0.00095140092869 |
| O7  | H13 | 0.57911618568    |
| H8  | H13 | 0.00035998234989 |
| H9  | H13 | 0.0039674536816  |
| C1  | H13 | 4.3765394718e-05 |
| H11 | H13 | 5.2595792411e-05 |
| H12 | H13 | 0.00020049243603 |



## ANILINE

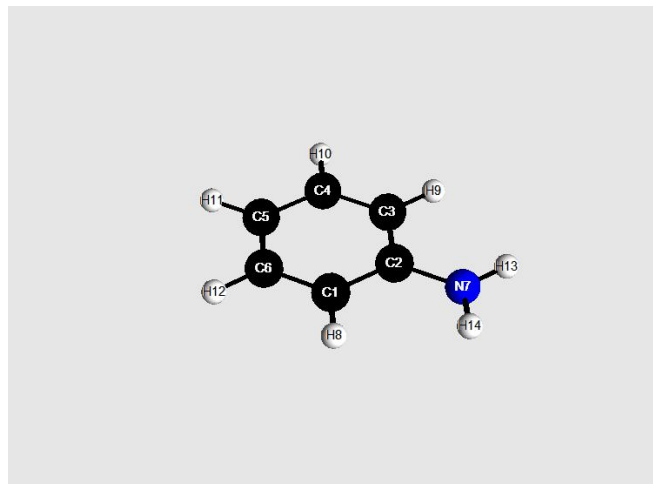

### HARTREE-FOCK

| Atom A | Atom B | Delocalization index |
|--------|--------|----------------------|
| C1     | C2     | 1.2952986653         |
| C1     | C3     | 0.065303257066       |
| C2     | C3     | 1.2952999924         |
| C1     | C4     | 0.092949816399       |
| C2     | C4     | 0.073122099543       |
| C3     | C4     | 1.4017559455         |
| C1     | C5     | 0.07271454065        |
| C2     | C5     | 0.082599148321       |
| C3     | C5     | 0.072731493175       |
| C4     | C5     | 1.3800595779         |
| C1     | C6     | 1.4017381096         |
| C2     | C6     | 0.073116392865       |
| C3     | C6     | 0.09295132385        |
| C4     | C6     | 0.07869441628        |
| C5     | C6     | 1.3800977204         |
| C1     | N7     | 0.1084882333         |
| C2     | N7     | 0.976983225          |
| C3     | N7     | 0.10846501312        |
| C4     | N7     | 0.014844311058       |
| C5     | N7     | 0.024743152775       |
| C6     | N7     | 0.014843573617       |
| C1     | H8     | 0.9768451972         |
| C2     | H8     | 0.048583313556       |
| C3     | H8     | 0.0073815124835      |
| C4     | H8     | 0.0061349558223      |
| C5     | H8     | 0.0087500823304      |
| C6     | H8     | 0.05009339187        |
| N7     | H8     | 0.014637980662       |
| C1     | H9     | 0.0073797246096      |
| C2     | H9     | 0.048568481352       |

|     |     |                  |
|-----|-----|------------------|
| C3  | H9  | 0.97687505381    |
| C4  | H9  | 0.050072683875   |
| C5  | H9  | 0.0087506956306  |
| C6  | H9  | 0.0061333678651  |
| N7  | H9  | 0.014635149151   |
| H8  | H9  | 0.0017402641145  |
| C1  | C1  | 0.0060894089794  |
| C2  | C1  | 0.0084955771952  |
| C3  | C1  | 0.050363031305   |
| C4  | C1  | 0.97516497518    |
| C5  | C1  | 0.048228645623   |
| C6  | C1  | 0.0088839011368  |
| N7  | C1  | 0.0014712847571  |
| H8  | C1  | 0.00039764759448 |
| H9  | C1  | 0.0061618544582  |
| C1  | H11 | 0.0091238529413  |
| C2  | H11 | 0.0056332116943  |
| C3  | H11 | 0.0091246671125  |
| C4  | H11 | 0.050382085215   |
| C5  | H11 | 0.98281956164    |
| C6  | H11 | 0.050383258111   |
| N7  | H11 | 0.0021641908569  |
| H8  | H11 | 0.0013580446856  |
| H9  | H11 | 0.0013580408107  |
| C1  | H11 | 0.005605014331   |
| C1  | H12 | 0.050344021979   |
| C2  | H12 | 0.0084957581131  |
| C3  | H12 | 0.0060908397201  |
| C4  | H12 | 0.0088852620324  |
| C5  | H12 | 0.04824344977    |
| C6  | H12 | 0.97524503221    |
| N7  | H12 | 0.0014712804506  |
| H8  | H12 | 0.0061618639261  |
| H9  | H12 | 0.00039764380006 |
| C1  | H12 | 0.0014914096105  |
| H11 | H12 | 0.0056050071256  |
| C1  | H13 | 0.007495260437   |
| C2  | H13 | 0.017707670842   |
| C3  | H13 | 0.0057148915638  |
| C4  | H13 | 0.00049910131076 |
| C5  | H13 | 0.00078016738373 |
| C6  | H13 | 0.00131130433    |
| N7  | H13 | 0.82399447613    |
| H8  | H13 | 0.00056175098755 |
| H9  | H13 | 0.0042885728813  |
| C1  | H13 | 3.8282886724e-05 |
| H11 | H13 | 8.9307913463e-05 |
| H12 | H13 | 0.00025223443687 |

|     |     |                  |
|-----|-----|------------------|
| C1  | H14 | 0.0057206267945  |
| C2  | H14 | 0.017710246807   |
| C3  | H14 | 0.0074937305488  |
| C4  | H14 | 0.001311332089   |
| C5  | H14 | 0.00078015595879 |
| C6  | H14 | 0.0004990931102  |
| N7  | H14 | 0.82399672054    |
| H8  | H14 | 0.0042885382439  |
| H9  | H14 | 0.00056174129037 |
| C1  | H14 | 0.00025223547235 |
| H11 | H14 | 8.9307859509e-05 |
| H12 | H14 | 3.8282800855e-05 |
| H13 | H14 | 0.016516940481   |

## PENTALENE

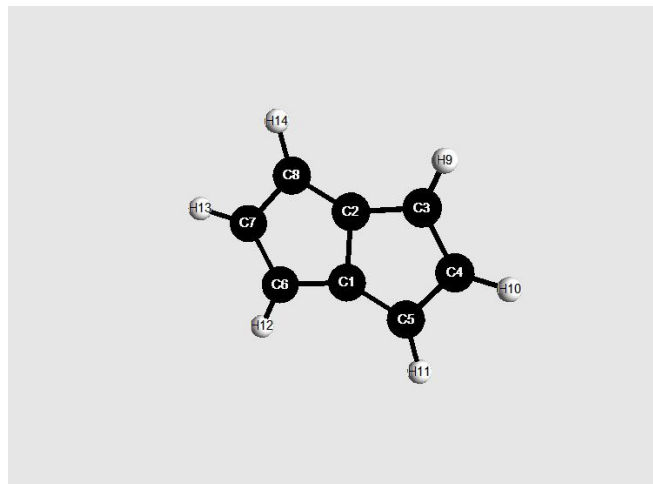

### HARTREE-FOCK

| Atom A | Atom B | Delocalization index |
|--------|--------|----------------------|
| C1     | C2     | 1.0266265125         |
| C1     | C3     | 0.093012733295       |
| C2     | C3     | 1.0483057244         |
| C1     | C4     | 0.076168435744       |
| C2     | C4     | 0.085503771648       |
| C3     | C4     | 1.7378493601         |
| C1     | C5     | 1.6854960283         |
| C2     | C5     | 0.081514078035       |
| C3     | C5     | 0.075018237934       |
| C4     | C5     | 1.0380639499         |
| C1     | C6     | 1.0483052597         |
| C2     | C6     | 0.093013173772       |
| C3     | C6     | 0.014315546155       |
| C4     | C6     | 0.014288315397       |
| C5     | C6     | 0.059661224092       |
| C1     | C7     | 0.085503241691       |
| C2     | C7     | 0.076168679253       |
| C3     | C7     | 0.014288266565       |
| C4     | C7     | 0.0080240914234      |
| C5     | C7     | 0.054318437714       |
| C6     | C7     | 1.7378493037         |
| C1     | C8     | 0.081513360606       |
| C2     | C8     | 1.6854958443         |
| C3     | C8     | 0.059661248687       |
| C4     | C8     | 0.054318537239       |
| C5     | C8     | 0.062186436204       |
| C6     | C8     | 0.075018348344       |
| C7     | C8     | 1.0380641948         |
| C1     | H9     | 0.011235964459       |
| C2     | H9     | 0.035200278662       |



|     |     |                  |
|-----|-----|------------------|
| C3  | H9  | 0.98105277427    |
| C4  | H9  | 0.058512119134   |
| C5  | H9  | 0.010589239377   |
| C6  | H9  | 0.001288378393   |
| C7  | H9  | 0.00085908542338 |
| C8  | H9  | 0.0020693931434  |
| C1  | C1  | 0.0068279722875  |
| C2  | C1  | 0.01083355497    |
| C3  | C1  | 0.060190600706   |
| C4  | C1  | 0.98356228582    |
| C5  | C1  | 0.035805265832   |
| C6  | C1  | 0.0019103743411  |
| C7  | C1  | 0.00086140119051 |
| C8  | C1  | 0.0041947391583  |
| H9  | C1  | 0.0041870209476  |
| C1  | H11 | 0.056587065108   |
| C2  | H11 | 0.010616808346   |
| C3  | H11 | 0.0065272519546  |
| C4  | H11 | 0.034729835757   |
| C5  | H11 | 0.9808195152     |
| C6  | H11 | 0.003536422118   |
| C7  | H11 | 0.0024280760171  |
| C8  | H11 | 0.0042397157384  |
| H9  | H11 | 0.001304859827   |
| C1  | H11 | 0.0017495141151  |
| C1  | H12 | 0.035200201807   |
| C2  | H12 | 0.011235950719   |
| C3  | H12 | 0.0012883749682  |
| C4  | H12 | 0.00085908666133 |
| C5  | H12 | 0.0020693840621  |
| C6  | H12 | 0.98105299285    |
| C7  | H12 | 0.058511858946   |
| C8  | H12 | 0.010589216705   |
| H9  | H12 | 0.0003296185547  |
| C1  | H12 | 8.332967247e-05  |
| H11 | H12 | 0.00053482000674 |
| C1  | H13 | 0.010833469319   |
| C2  | H13 | 0.0068279462122  |
| C3  | H13 | 0.0019103526282  |
| C4  | H13 | 0.00086139646651 |
| C5  | H13 | 0.0041947139226  |
| C6  | H13 | 0.060190174872   |
| C7  | H13 | 0.9835602622     |
| C8  | H13 | 0.035805057818   |
| H9  | H13 | 8.3328437088e-05 |
| C1  | H13 | 0.00023781307838 |
| H11 | H13 | 0.00013930434016 |
| H12 | H13 | 0.0041868851874  |

|     |     |                  |
|-----|-----|------------------|
| C1  | H14 | 0.010616781532   |
| C2  | H14 | 0.056586994008   |
| C3  | H14 | 0.0035364331326  |
| C4  | H14 | 0.0024280750332  |
| C5  | H14 | 0.004239706505   |
| C6  | H14 | 0.0065272630805  |
| C7  | H14 | 0.034729819269   |
| C8  | H14 | 0.98081948537    |
| H9  | H14 | 0.00053482335639 |
| C1  | H14 | 0.00013930555635 |
| H11 | H14 | 0.00063784349031 |
| H12 | H14 | 0.0013048610115  |
| H13 | H14 | 0.0017495075806  |

## BENZALDEHYDE

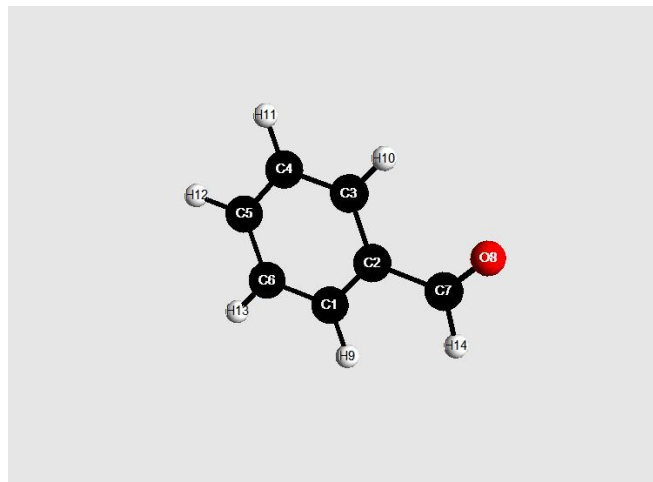

### HARTREE-FOCK

| Atom A | Atom B | Delocalization index |
|--------|--------|----------------------|
| C1     | C2     | 1.3690686323         |
| C1     | C3     | 0.069928724944       |
| C2     | C3     | 1.3313541498         |
| C1     | C4     | 0.093817209842       |
| C2     | C4     | 0.073501305237       |
| C3     | C4     | 1.4130392497         |
| C1     | C5     | 0.077219598493       |
| C2     | C5     | 0.092364324459       |
| C3     | C5     | 0.076355717207       |
| C4     | C5     | 1.3644105537         |
| C1     | C6     | 1.3778589218         |
| C2     | C6     | 0.070590566381       |
| C3     | C6     | 0.096129243369       |
| C4     | C6     | 0.07192980312        |
| C5     | C6     | 1.3983771292         |
| C1     | C7     | 0.06259199175        |
| C2     | C7     | 0.98074934909        |
| C3     | C7     | 0.049371520799       |
| C4     | C7     | 0.0086620330179      |
| C5     | C7     | 0.01048018115        |
| C6     | C7     | 0.008056151316       |
| C1     | O8     | 0.028373248631       |
| C2     | O8     | 0.12236990185        |
| C3     | O8     | 0.04050910227        |
| C4     | O8     | 0.003789656237       |
| C5     | O8     | 0.011795703355       |
| C6     | O8     | 0.003997102119       |
| C7     | O8     | 1.2966017834         |
| C1     | H9     | 0.96765930138        |
| C2     | H9     | 0.04697535879        |

|     |     |                  |
|-----|-----|------------------|
| C3  | H9  | 0.0085423629423  |
| C4  | H9  | 0.0059108356389  |
| C5  | H9  | 0.0083186553286  |
| C6  | H9  | 0.04701856388    |
| C7  | H9  | 0.010768504266   |
| O8  | H9  | 0.002900779021   |
| C1  | C1  | 0.0079212228429  |
| C2  | C1  | 0.041734784155   |
| C3  | C1  | 0.95522716178    |
| C4  | C1  | 0.045066966704   |
| C5  | C1  | 0.0078795778852  |
| C6  | C1  | 0.0051313314806  |
| C7  | C1  | 0.0050334571537  |
| O8  | C1  | 0.023550466213   |
| H9  | C1  | 0.0014308416252  |
| C1  | H11 | 0.0056832256361  |
| C2  | H11 | 0.0086254961235  |
| C3  | H11 | 0.0496803982     |
| C4  | H11 | 0.97476171064    |
| C5  | H11 | 0.048022220876   |
| C6  | H11 | 0.0083020852681  |
| C7  | H11 | 0.0011738898665  |
| O8  | H11 | 0.00020690725399 |
| H9  | H11 | 0.00038753946892 |
| C1  | H11 | 0.0053533574784  |
| C1  | H12 | 0.0085664836678  |
| C2  | H12 | 0.005582920508   |
| C3  | H12 | 0.008311829152   |
| C4  | H12 | 0.047135183151   |
| C5  | H12 | 0.97372700036    |
| C6  | H12 | 0.048604540919   |
| C7  | H12 | 0.00057286608685 |
| O8  | H12 | 0.00081078933437 |
| H9  | H12 | 0.0013135256338  |
| C1  | H12 | 0.0012213172382  |
| H11 | H12 | 0.005439747028   |
| C1  | H13 | 0.048823715962   |
| C2  | H13 | 0.008483475476   |
| C3  | H13 | 0.0059101572897  |
| C4  | H13 | 0.0084593682815  |
| C5  | H13 | 0.049128451917   |
| C6  | H13 | 0.97550461296    |
| C7  | H13 | 0.0010614996408  |
| O8  | H13 | 0.00056311914093 |
| H9  | H13 | 0.0054616358723  |
| C1  | H13 | 0.00033781004207 |
| H11 | H13 | 0.0013181602781  |
| H12 | H13 | 0.005572382801   |

|     |     |                  |
|-----|-----|------------------|
| C1  | H14 | 0.012021914255   |
| C2  | H14 | 0.049656709548   |
| C3  | H14 | 0.0066650243986  |
| C4  | H14 | 0.0016200789752  |
| C5  | H14 | 0.00072743979344 |
| C6  | H14 | 0.0010067380787  |
| C7  | H14 | 0.88448220849    |
| O8  | H14 | 0.12041478142    |
| H9  | H14 | 0.011571024673   |
| C1  | H14 | 0.00077117596089 |
| H11 | H14 | 0.00042277393244 |
| H12 | H14 | 6.8900731616e-05 |
| H13 | H14 | 2.9292518917e-05 |

## TOLUENE

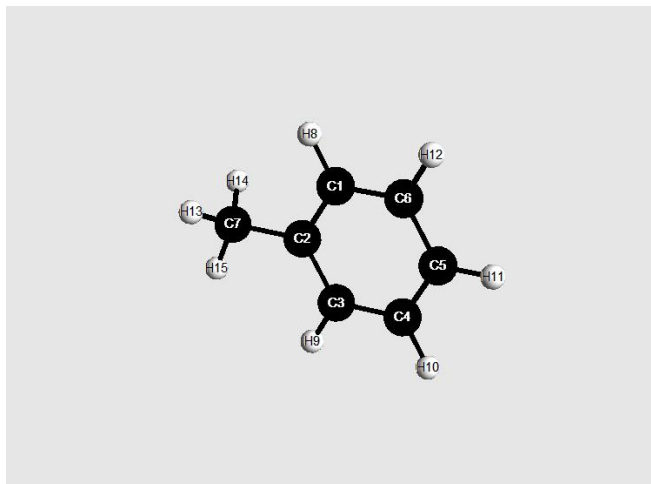

### HARTREE-FOCK

| Atom A | Atom B | Delocalization index |
|--------|--------|----------------------|
| C1     | C2     | 1.3529709674         |
| C1     | C3     | 0.074347839685       |
| C2     | C3     | 1.3780029372         |
| C1     | C4     | 0.099141830083       |
| C2     | C4     | 0.072271131561       |
| C3     | C4     | 1.3765924632         |
| C1     | C5     | 0.073024852801       |
| C2     | C5     | 0.094437768576       |
| C3     | C5     | 0.073300603401       |
| C4     | C5     | 1.3988068447         |
| C1     | C6     | 1.4016152859         |
| C2     | C6     | 0.072408090525       |
| C3     | C6     | 0.097048440771       |
| C4     | C6     | 0.07581786824        |
| C5     | C6     | 1.3753741559         |
| C1     | C7     | 0.05003912168        |
| C2     | C7     | 1.0006553397         |
| C3     | C7     | 0.050073047955       |
| C4     | C7     | 0.0078709759638      |
| C5     | C7     | 0.0049625174695      |
| C6     | C7     | 0.0083077724305      |
| C1     | H8     | 0.97318822784        |
| C2     | H8     | 0.047295827167       |
| C3     | H8     | 0.0084387983805      |
| C4     | H8     | 0.0062369060885      |
| C5     | H8     | 0.0085461161991      |
| C6     | H8     | 0.050631452494       |
| C7     | H8     | 0.010338262832       |
| C1     | H9     | 0.0084665347406      |
| C2     | H9     | 0.048430567038       |

|     |     |                  |
|-----|-----|------------------|
| C3  | H9  | 0.97190209073    |
| C4  | H9  | 0.049376736571   |
| C5  | H9  | 0.0084890389254  |
| C6  | H9  | 0.0062278275306  |
| C7  | H9  | 0.010698947754   |
| H8  | H9  | 0.0015842182872  |
| C1  | C1  | 0.0063860299062  |
| C2  | C1  | 0.0084990661368  |
| C3  | C1  | 0.049064932317   |
| C4  | C1  | 0.97698237879    |
| C5  | C1  | 0.049707611808   |
| C6  | C1  | 0.0087916251504  |
| C7  | C1  | 0.0011538094032  |
| H8  | C1  | 0.00041342414399 |
| H9  | C1  | 0.0058570314029  |
| C1  | H11 | 0.0086298606701  |
| C2  | H11 | 0.0061112365945  |
| C3  | H11 | 0.0087563962752  |
| C4  | H11 | 0.050065866207   |
| C5  | H11 | 0.97853042825    |
| C6  | H11 | 0.049137776731   |
| C7  | H11 | 0.00039206574832 |
| H8  | H11 | 0.0013633969958  |
| H9  | H11 | 0.0013519007358  |
| C1  | H11 | 0.0056867912702  |
| C1  | H12 | 0.05008088156    |
| C2  | H12 | 0.0086073221898  |
| C3  | H12 | 0.0062631429103  |
| C4  | H12 | 0.0086852166877  |
| C5  | H12 | 0.048764494992   |
| C6  | H12 | 0.97693549785    |
| C7  | H12 | 0.0011628725002  |
| H8  | H12 | 0.0059836672948  |
| H9  | H12 | 0.00041460347473 |
| C1  | H12 | 0.0014345009056  |
| H11 | H12 | 0.0055706040975  |
| C1  | H13 | 0.010268715753   |
| C2  | H13 | 0.045070648348   |
| C3  | H13 | 0.0098713732938  |
| C4  | H13 | 0.0015152498243  |
| C5  | H13 | 0.0033796156289  |
| C6  | H13 | 0.001092511516   |
| C7  | H13 | 0.95939887822    |
| H8  | H13 | 0.0028391241684  |
| H9  | H13 | 0.0007745283432  |
| C1  | H13 | 0.00017011460453 |
| H11 | H13 | 0.00024954403973 |
| H12 | H13 | 5.5794013809e-05 |

|     |     |                  |
|-----|-----|------------------|
| C1  | H14 | 0.010271165403   |
| C2  | H14 | 0.045008384433   |
| C3  | H14 | 0.0098671517922  |
| C4  | H14 | 0.0015157914606  |
| C5  | H14 | 0.0033712621897  |
| C6  | H14 | 0.0010919250889  |
| C7  | H14 | 0.95936053468    |
| H8  | H14 | 0.0028574990327  |
| H9  | H14 | 0.00077581272819 |
| C1  | H14 | 0.00017053790731 |
| H11 | H14 | 0.00024901646661 |
| H12 | H14 | 5.5758968558e-05 |
| H13 | H14 | 0.042440037773   |
| C1  | H15 | 0.0079491894677  |
| C2  | H15 | 0.041752101795   |
| C3  | H15 | 0.012693348794   |
| C4  | H15 | 0.001060226578   |
| C5  | H15 | 0.00042606162082 |
| C6  | H15 | 0.0016062359057  |
| C7  | H15 | 0.96055737592    |
| H8  | H15 | 0.0011298422813  |
| H9  | H15 | 0.010411521686   |
| C1  | H15 | 7.8577476862e-05 |
| H11 | H15 | 6.3916548358e-05 |
| H12 | H15 | 0.00029943937809 |
| H13 | H15 | 0.041803505963   |
| H14 | H15 | 0.041802709725   |



# CYANIDES AND ISOCYANIDES

## ISOACETONITRILE

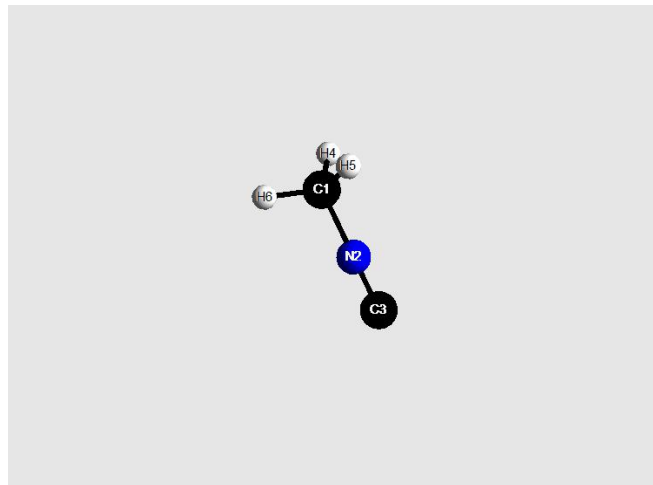

### HARTREE-FOCK

| Atom A | Atom B | Delocalization index |
|--------|--------|----------------------|
| C1     | N2     | 0.83107107324        |
| C1     | C3     | 0.031809056057       |
| N2     | C3     | 1.7820915337         |
| C1     | H4     | 0.92735707307        |
| N2     | H4     | 0.075811275014       |
| C3     | H4     | 0.013388780145       |
| C1     | H5     | 0.92726777452        |
| N2     | H5     | 0.075819393776       |
| C3     | H5     | 0.013390755538       |
| H4     | H5     | 0.034615572686       |
| C1     | H6     | 0.92722873051        |
| N2     | H6     | 0.075831015944       |
| C3     | H6     | 0.013392405808       |
| H4     | H6     | 0.034617806773       |
| H5     | H6     | 0.034618083859       |

### CCSD

| Atom A | Atom B | Delocalization index |
|--------|--------|----------------------|
| C1     | N2     | 0.7882517435         |
| C1     | C3     | 0.029420741329       |
| N2     | C3     | 1.5895480912         |
| C1     | H4     | 0.80257169033        |
| N2     | H4     | 0.054716273922       |
| C3     | H4     | 0.011003281602       |
| C1     | H5     | 0.8024676274         |
| N2     | H5     | 0.054720157383       |
| C3     | H5     | 0.011003821636       |
| H4     | H5     | 0.027561868065       |

|    |    |                |
|----|----|----------------|
| C1 | H6 | 0.8024320645   |
| N2 | H6 | 0.054725039944 |
| C3 | H6 | 0.01100354347  |
| H4 | H6 | 0.027558346221 |
| H5 | H6 | 0.027558079074 |

## PROPANENITRILE

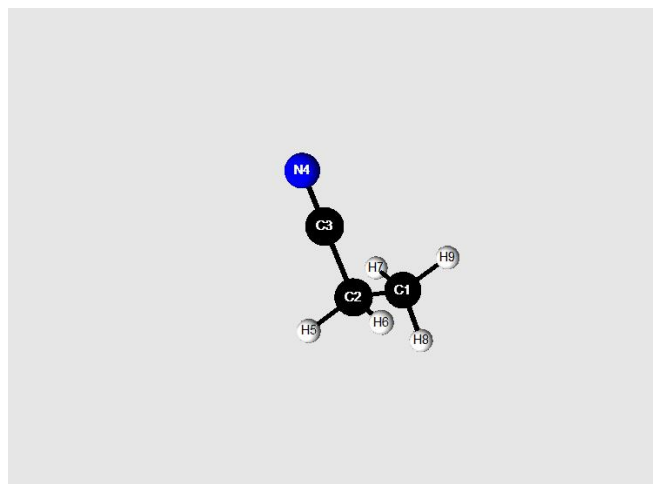

## HARTREE-FOCK

| Atom A | Atom B | Delocalization index |
|--------|--------|----------------------|
| C1     | C2     | 0.96878491169        |
| C1     | C3     | 0.056613137602       |
| C2     | C3     | 0.97992806139        |
| C1     | N4     | 0.023161729482       |
| C2     | N4     | 0.08246162212        |
| C3     | N4     | 2.2298842966         |
| C1     | H5     | 0.035615085445       |
| C2     | H5     | 0.93598646725        |
| C3     | H5     | 0.054485148391       |
| N4     | H5     | 0.021301648812       |
| C1     | H6     | 0.035607224778       |
| C2     | H6     | 0.9359095662         |
| C3     | H6     | 0.054485972795       |
| N4     | H6     | 0.021301806633       |
| H5     | H6     | 0.03531237278        |
| C1     | H7     | 0.96218047009        |
| C2     | H7     | 0.043378422479       |
| C3     | H7     | 0.0069259698613      |
| N4     | H7     | 0.0034089490266      |
| H5     | H7     | 0.0031646499012      |
| H6     | H7     | 0.010382325729       |
| C1     | H8     | 0.96476918929        |
| C2     | H8     | 0.043925471453       |
| C3     | H8     | 0.01052166736        |
| N4     | H8     | 0.0038089100106      |
| H5     | H8     | 0.0034244127061      |
| H6     | H8     | 0.0034248681676      |
| H7     | H8     | 0.04035487347        |
| C1     | H9     | 0.962151414          |
| C2     | H9     | 0.043382647777       |

|    |    |                 |
|----|----|-----------------|
| C3 | H9 | 0.006923326166  |
| N4 | H9 | 0.003409369349  |
| H5 | H9 | 0.010382293115  |
| H6 | H9 | 0.0031643279046 |
| H7 | H9 | 0.040315726644  |
| H8 | H9 | 0.040354729758  |

#### CCSD

| Atom A | Atom B | Delocalization index |
|--------|--------|----------------------|
| C1     | C2     | 0.83405495866        |
| C1     | C3     | 0.046897768243       |
| C2     | C3     | 0.87323514137        |
| C1     | N4     | 0.017045823839       |
| C2     | N4     | 0.060063785121       |
| C3     | N4     | 1.9131874492         |
| C1     | H5     | 0.029651833235       |
| C2     | H5     | 0.80515817218        |
| C3     | H5     | 0.041078918009       |
| N4     | H5     | 0.015392907965       |
| C1     | H6     | 0.029652193272       |
| C2     | H6     | 0.80500792355        |
| C3     | H6     | 0.041077939909       |
| N4     | H6     | 0.015392955088       |
| H5     | H6     | 0.028448329868       |
| C1     | H7     | 0.82708038324        |
| C2     | H7     | 0.034086851927       |
| C3     | H7     | 0.0072134350689      |
| N4     | H7     | 0.0026757376265      |
| H5     | H7     | 0.0027947596784      |
| H6     | H7     | 0.0083925467844      |
| C1     | H8     | 0.82959334201        |
| C2     | H8     | 0.034532148779       |
| C3     | H8     | 0.0079400859076      |
| N4     | H8     | 0.0030357724517      |
| H5     | H8     | 0.0030343624042      |
| H6     | H8     | 0.0030345202326      |
| H7     | H8     | 0.03162492564        |
| C1     | H9     | 0.8270823704         |
| C2     | H9     | 0.03409407958        |
| C3     | H9     | 0.0072119880538      |
| N4     | H9     | 0.0026763631148      |
| H5     | H9     | 0.0083927015958      |
| H6     | H9     | 0.0027956725991      |
| H7     | H9     | 0.031691272528       |
| H8     | H9     | 0.031624645148       |

## BUTANENITRILE

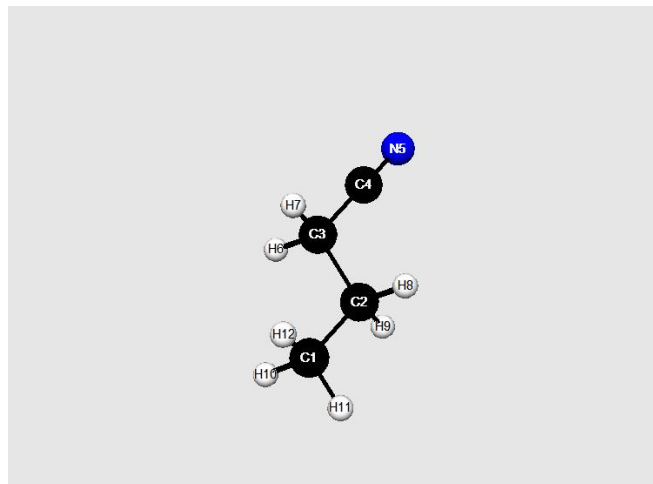

## HARTREE-FOCK

| Atom A | Atom B | Delocalization index |
|--------|--------|----------------------|
| C1     | C2     | 0.98121301622        |
| C1     | C3     | 0.047194952474       |
| C2     | C3     | 0.95180361078        |
| C1     | C4     | 0.0097115797684      |
| C2     | C4     | 0.054776994357       |
| C3     | C4     | 0.97970639891        |
| C1     | N5     | 0.0035050341746      |
| C2     | N5     | 0.022378019333       |
| C3     | N5     | 0.082142202091       |
| C4     | N5     | 2.2284172898         |
| C1     | H6     | 0.0071667260875      |
| C2     | H6     | 0.033832037692       |
| C3     | H6     | 0.93224653079        |
| C4     | H6     | 0.054346408605       |
| N5     | H6     | 0.02107939308        |
| C1     | H7     | 0.0071714607186      |
| C2     | H7     | 0.033794734805       |
| C3     | H7     | 0.93225892915        |
| C4     | H7     | 0.054346739892       |
| N5     | H7     | 0.021079853302       |
| H6     | H7     | 0.035511925346       |
| C1     | H8     | 0.040457975601       |
| C2     | H8     | 0.94868894229        |
| C3     | H8     | 0.044006161743       |
| C4     | H8     | 0.0076017114694      |
| N5     | H8     | 0.0038874778068      |
| H6     | H8     | 0.010137113322       |
| H7     | H8     | 0.0031909565561      |
| C1     | H9     | 0.040454872377       |
| C2     | H9     | 0.94849621241        |

|     |     |                  |
|-----|-----|------------------|
| C3  | H9  | 0.044003311503   |
| C4  | H9  | 0.0076068981548  |
| N5  | H9  | 0.0038894785132  |
| H6  | H9  | 0.0031886650626  |
| H7  | H9  | 0.01013719264    |
| H8  | H9  | 0.04024802478    |
| C1  | C1  | 0.96287201235    |
| C2  | C1  | 0.042242312819   |
| C3  | C1  | 0.0072796340882  |
| C4  | C1  | 0.00073641208758 |
| N5  | C1  | 0.00042986425941 |
| H6  | C1  | 0.0057628718667  |
| H7  | C1  | 0.00046498479996 |
| H8  | C1  | 0.011152008071   |
| H9  | C1  | 0.0034788343256  |
| C1  | H11 | 0.96462143068    |
| C2  | H11 | 0.042098088871   |
| C3  | H11 | 0.010498555007   |
| C4  | H11 | 0.0019640407478  |
| N5  | H11 | 0.00075611971584 |
| H6  | H11 | 0.00077978929183 |
| H7  | H11 | 0.00077895874005 |
| H8  | H11 | 0.0035826452064  |
| H9  | H11 | 0.0035800750784  |
| C1  | H11 | 0.042483005756   |
| C1  | H12 | 0.96288908184    |
| C2  | H12 | 0.042206272119   |
| C3  | H12 | 0.0072782083312  |
| C4  | H12 | 0.0007370625433  |
| N5  | H12 | 0.00042989390239 |
| H6  | H12 | 0.00046541446625 |
| H7  | H12 | 0.0057630436985  |
| H8  | H12 | 0.0034754648277  |
| H9  | H12 | 0.01115237279    |
| C1  | H12 | 0.043496466139   |
| H11 | H12 | 0.042483128419   |

#### CCSD

| Atom A | Atom B | Delocalization index |
|--------|--------|----------------------|
| C1     | C2     | 0.84367382433        |
| C1     | C3     | 0.040403642747       |
| C2     | C3     | 0.81863354305        |
| C1     | C4     | 0.0072447271091      |
| C2     | C4     | 0.045022776629       |
| C3     | C4     | 0.87380721638        |
| C1     | N5     | 0.0027259949107      |
| C2     | N5     | 0.016406668747       |
| C3     | N5     | 0.059833439897       |

|    |     |                  |
|----|-----|------------------|
| C4 | N5  | 1.9122992251     |
| C1 | H6  | 0.0069787065493  |
| C2 | H6  | 0.028017334033   |
| C3 | H6  | 0.80066760129    |
| C4 | H6  | 0.040664513103   |
| N5 | H6  | 0.01516382636    |
| C1 | H7  | 0.0069494477795  |
| C2 | H7  | 0.027964250439   |
| C3 | H7  | 0.80065478675    |
| C4 | H7  | 0.04066458087    |
| N5 | H7  | 0.015163985904   |
| H6 | H7  | 0.028443988815   |
| C1 | H8  | 0.032748685459   |
| C2 | H8  | 0.81326256159    |
| C3 | H8  | 0.034698525224   |
| C4 | H8  | 0.0080066482234  |
| N5 | H8  | 0.0029801788322  |
| H6 | H8  | 0.0082434861871  |
| H7 | H8  | 0.0028177925923  |
| C1 | H9  | 0.032742701833   |
| C2 | H9  | 0.81329465944    |
| C3 | H9  | 0.034726180063   |
| C4 | H9  | 0.0080069298156  |
| N5 | H9  | 0.0029799237606  |
| H6 | H9  | 0.0028182263172  |
| H7 | H9  | 0.0082435794168  |
| H8 | H9  | 0.031506647571   |
| C1 | C1  | 0.82690687896    |
| C2 | C1  | 0.03330233217    |
| C3 | C1  | 0.006806385609   |
| C4 | C1  | 0.00065285485483 |
| N5 | C1  | 0.0003864301211  |
| H6 | C1  | 0.006738288765   |
| H7 | C1  | 0.00050544297929 |
| H8 | C1  | 0.008929373361   |
| H9 | C1  | 0.0030256696896  |
| C1 | H11 | 0.82945854899    |
| C2 | H11 | 0.033309234401   |
| C3 | H11 | 0.0081020067963  |
| C4 | H11 | 0.0016179145807  |
| N5 | H11 | 0.00066636272233 |
| H6 | H11 | 0.00071449892524 |
| H7 | H11 | 0.0007145997286  |
| H8 | H11 | 0.0030882158368  |
| H9 | H11 | 0.0030886025993  |
| C1 | H11 | 0.032981066895   |
| C1 | H12 | 0.82680368526    |
| C2 | H12 | 0.033248947599   |

|     |     |                  |
|-----|-----|------------------|
| C3  | H12 | 0.0068074150301  |
| C4  | H12 | 0.00065286849221 |
| N5  | H12 | 0.00038643681478 |
| H6  | H12 | 0.00050537804609 |
| H7  | H12 | 0.0067386921143  |
| H8  | H12 | 0.0030259401872  |
| H9  | H12 | 0.0089293503257  |
| C1  | H12 | 0.033739031128   |
| H11 | H12 | 0.032980783035   |



## ISOCYANOFORMONITRILE

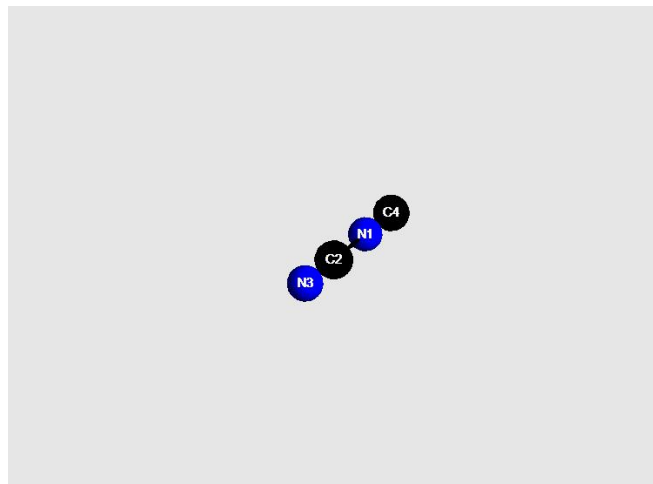

### HARTREE-FOCK

| Atom A | Atom B | Delocalization index |
|--------|--------|----------------------|
| N1     | C2     | 0.9028504478         |
| N1     | N3     | 0.25586826295        |
| C2     | N3     | 2.1683113209         |
| N1     | C4     | 1.6067681119         |
| C2     | C4     | 0.02081611995        |
| N3     | C4     | 0.078051562627       |

### CCSD

| Atom A | Atom B | Delocalization index |
|--------|--------|----------------------|
| N1     | C2     | 0.89948056873        |
| N1     | N3     | 0.14477345883        |
| C2     | N3     | 1.8751800565         |
| N1     | C4     | 1.4651362854         |
| C2     | C4     | 0.021266899577       |
| N3     | C4     | 0.058513973176       |

## HYDROGEN CYANIDE

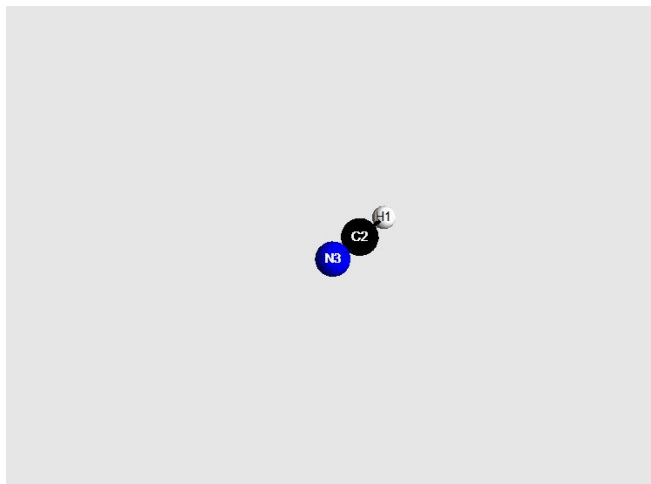

### HARTREE-FOCK

| Atom A | Atom B | Delocalization index |
|--------|--------|----------------------|
| H1     | C2     | 0.92783056184        |
| H1     | N3     | 0.086058081245       |
| C2     | N3     | 2.3399366081         |

### CCSD

| Atom A | Atom B | Delocalization index |
|--------|--------|----------------------|
| H1     | C2     | 0.81631676577        |
| H1     | N3     | 0.061912316594       |
| C2     | N3     | 1.9767703517         |

## HYDROGEN ISOCYANIDE

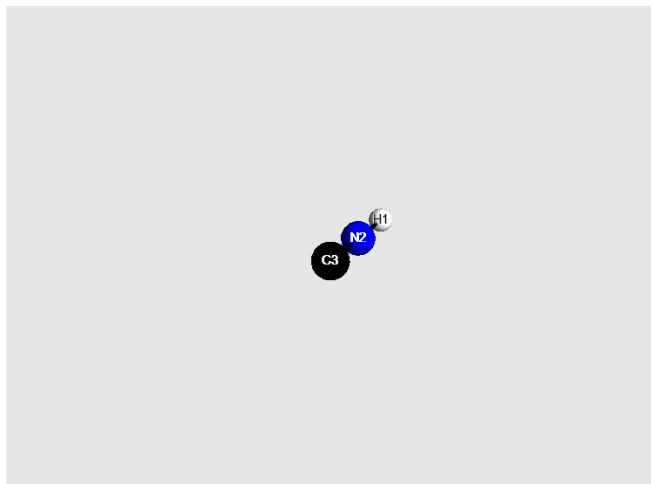

### HARTREE-FOCK

| Atom A | Atom B | Delocalization index |
|--------|--------|----------------------|
| H1     | N2     | 0.66808196818        |
| H1     | C3     | 0.023095231881       |
| N2     | C3     | 1.7665072039         |

### CCSD

| Atom A | Atom B | Delocalization index |
|--------|--------|----------------------|
| H1     | N2     | 0.64803803697        |
| H1     | C3     | 0.024518995719       |
| N2     | C3     | 1.5865128593         |

## CYANOGEN

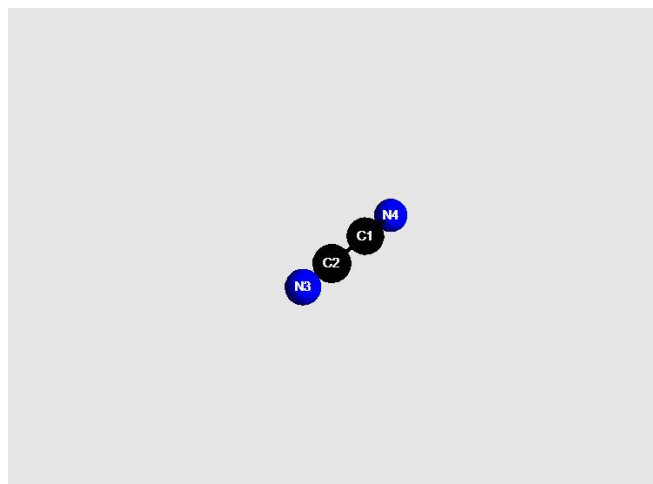

### HARTREE-FOCK

| Atom A | Atom B | Delocalization index |
|--------|--------|----------------------|
| C1     | C2     | 1.0787899887         |
| C1     | N3     | 0.10711710448        |
| C2     | N3     | 2.2991904698         |
| C1     | N4     | 2.2992236278         |
| C2     | N4     | 0.10711553806        |
| N3     | N4     | 0.11326018577        |

### CCSD

| Atom A | Atom B | Delocalization index |
|--------|--------|----------------------|
| C1     | C2     | 0.98264152313        |
| C1     | N3     | 0.068220574968       |
| C2     | N3     | 1.9134418957         |
| C1     | N4     | 1.9134422275         |
| C2     | N4     | 0.068220570478       |
| N3     | N4     | 0.073610972285       |

## ACRYLONITRILE

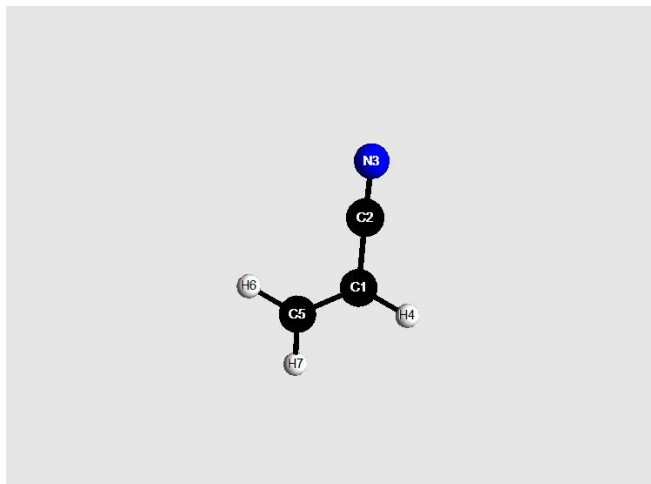

### HARTREE-FOCK

| Atom A | Atom B | Delocalization index |
|--------|--------|----------------------|
| C1     | C2     | 1.049023161          |
| C1     | N3     | 0.090337327051       |
| C2     | N3     | 2.230303882          |
| C1     | H4     | 0.95499918726        |
| C2     | H4     | 0.043802700712       |
| N3     | H4     | 0.017070656086       |
| C1     | C5     | 1.8009197961         |
| C2     | C5     | 0.090140816162       |
| N3     | C5     | 0.068520544655       |
| H4     | C5     | 0.055298412615       |
| C1     | H6     | 0.061821974481       |
| C2     | H6     | 0.010734604906       |
| N3     | H6     | 0.005596046089       |
| H4     | H6     | 0.010979386776       |
| C5     | H6     | 0.96879340079        |
| C1     | H7     | 0.063301928658       |
| C2     | H7     | 0.010880363333       |
| N3     | H7     | 0.0052889010693      |
| H4     | H7     | 0.0068466840898      |
| C5     | H7     | 0.97362332395        |
| H6     | H7     | 0.032775714399       |

### CCSD

| Atom A | Atom B | Delocalization index |
|--------|--------|----------------------|
| C1     | C2     | 0.93750596716        |
| C1     | N3     | 0.063125450386       |
| C2     | N3     | 1.9019410862         |
| C1     | H4     | 0.82464699748        |
| C2     | H4     | 0.03321791377        |
| N3     | H4     | 0.012447449257       |

|    |    |                 |
|----|----|-----------------|
| C1 | C5 | 1.4345970862    |
| C2 | C5 | 0.061628188592  |
| N3 | C5 | 0.045337142812  |
| H4 | C5 | 0.040649681213  |
| C1 | H6 | 0.044356656211  |
| C2 | H6 | 0.010072823249  |
| N3 | H6 | 0.0041054391306 |
| H4 | H6 | 0.0091142534338 |
| C5 | H6 | 0.83807987721   |
| C1 | H7 | 0.04555603854   |
| C2 | H7 | 0.0082163927156 |
| N3 | H7 | 0.0039748925824 |
| H4 | H7 | 0.0054906866125 |
| C5 | H7 | 0.84272389923   |
| H6 | H7 | 0.02626403299   |

## ISOCYANOETHYNE

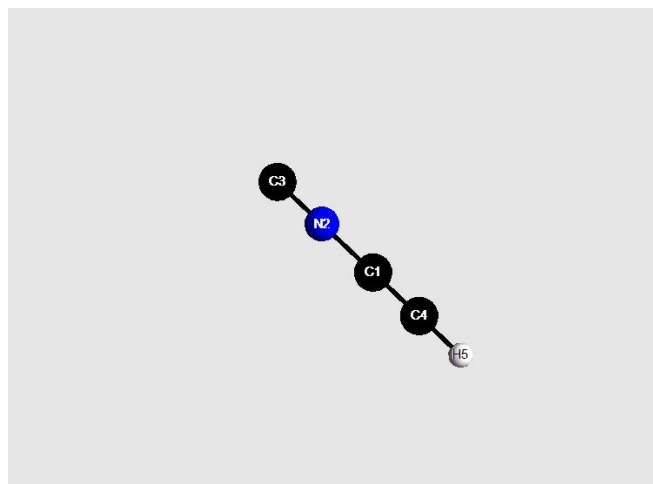

### HARTREE-FOCK

| Atom A | Atom B | Delocalization index |
|--------|--------|----------------------|
| C1     | N2     | 1.0068724175         |
| C1     | C3     | 0.044102192918       |
| N2     | C3     | 1.656188671          |
| C1     | C4     | 2.4709190996         |
| N2     | C4     | 0.17571455759        |
| C3     | C4     | 0.071666163624       |
| C1     | H5     | 0.078778768441       |
| N2     | H5     | 0.0062453840843      |
| C3     | H5     | 0.0024731538892      |
| C4     | H5     | 0.95206615066        |

### CCSD

| Atom A | Atom B | Delocalization index |
|--------|--------|----------------------|
| C1     | N2     | 0.95052416585        |
| C1     | C3     | 0.03440432018        |
| N2     | C3     | 1.4954862943         |
| C1     | C4     | 2.0222100646         |
| N2     | C4     | 0.10814952329        |
| C3     | C4     | 0.05745613246        |
| C1     | H5     | 0.05127148657        |
| N2     | H5     | 0.0042967023523      |
| C3     | H5     | 0.0021957414765      |
| C4     | H5     | 0.83643302075        |

## PROPIOLONITRILE

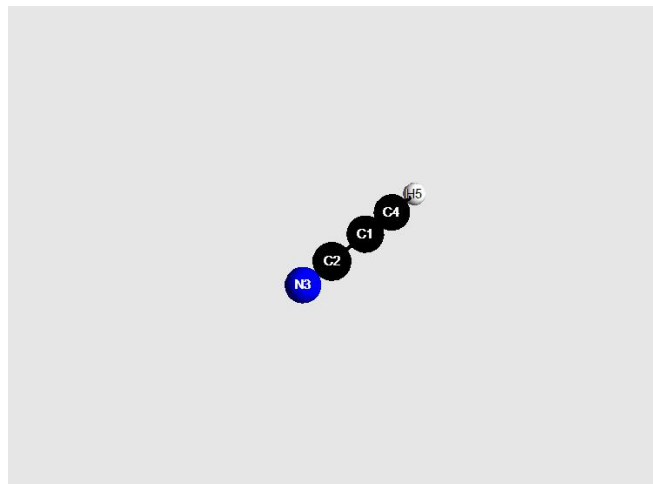

### HARTREE-FOCK

| Atom A | Atom B | Delocalization index |
|--------|--------|----------------------|
| C1     | C2     | 1.125097298          |
| C1     | N3     | 0.10151021379        |
| C2     | N3     | 2.2439011777         |
| C1     | C4     | 1.7305309211         |
| C2     | C4     | 0.074244749423       |
| N3     | C4     | 0.10594028053        |
| C1     | H5     | 0.052905337789       |
| C2     | H5     | 0.002412593904       |
| N3     | H5     | 0.0036761712976      |
| C4     | H5     | 0.94520681146        |

### CCSD

| Atom A | Atom B | Delocalization index |
|--------|--------|----------------------|
| C1     | C2     | 1.0330082699         |
| C1     | N3     | 0.07329984058        |
| C2     | N3     | 1.8888033469         |
| C1     | C4     | 2.0903575111         |
| C2     | C4     | 0.05550529046        |
| N3     | C4     | 0.076553965232       |
| C1     | H5     | 0.047371233487       |
| C2     | H5     | 0.002115590802       |
| N3     | H5     | 0.0027875567628      |
| C4     | H5     | 0.83677479163        |



## ISOCYANOETHENE

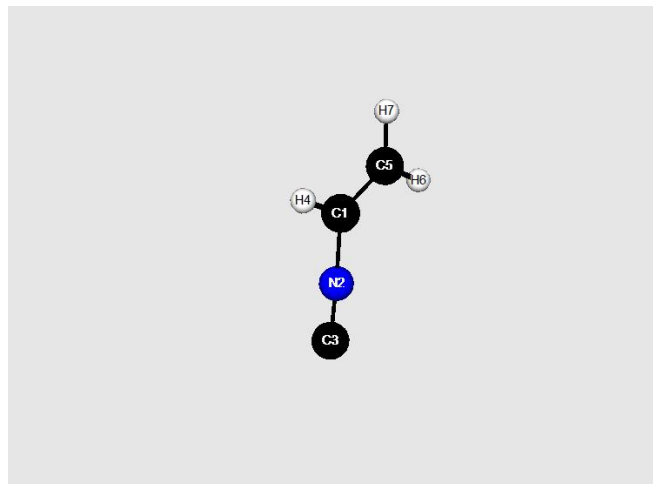

### HARTREE-FOCK

| Atom A | Atom B | Delocalization index |
|--------|--------|----------------------|
| C1     | N2     | 0.87129755266        |
| C1     | C3     | 0.032299157304       |
| N2     | C3     | 1.7384044225         |
| C1     | H4     | 0.9340275096         |
| N2     | H4     | 0.069210700233       |
| C3     | H4     | 0.011110734417       |
| C1     | C5     | 1.7579763749         |
| N2     | C5     | 0.14827341458        |
| C3     | C5     | 0.044223508941       |
| H4     | C5     | 0.053064190179       |
| C1     | H6     | 0.064032390559       |
| N2     | H6     | 0.01631747142        |
| C3     | H6     | 0.0024077129184      |
| H4     | H6     | 0.010269089447       |
| C5     | H6     | 0.96872303389        |
| C1     | H7     | 0.068174453669       |
| N2     | H7     | 0.014508236851       |
| C3     | H7     | 0.0031406042752      |
| H4     | H7     | 0.0059895087826      |
| C5     | H7     | 0.97501656602        |
| H6     | H7     | 0.032479541331       |

### CCSD

| Atom A | Atom B | Delocalization index |
|--------|--------|----------------------|
| C1     | N2     | 0.8285453281         |
| C1     | C3     | 0.028361566425       |
| N2     | C3     | 1.5568663104         |
| C1     | H4     | 0.80925397013        |
| N2     | H4     | 0.049953682643       |
| C3     | H4     | 0.0091811785224      |

|    |    |                 |
|----|----|-----------------|
| C1 | C5 | 1.4118448598    |
| N2 | C5 | 0.098445105213  |
| C3 | C5 | 0.032787328882  |
| H4 | C5 | 0.039205139893  |
| C1 | H6 | 0.04401674149   |
| N2 | H6 | 0.013827767942  |
| C3 | H6 | 0.0021490190073 |
| H4 | H6 | 0.0084982316412 |
| C5 | H6 | 0.83783555176   |
| C1 | H7 | 0.04755134651   |
| N2 | H7 | 0.010474274257  |
| C3 | H7 | 0.0027681558678 |
| H4 | H7 | 0.004766783827  |
| C5 | H7 | 0.84395406617   |
| H6 | H7 | 0.025500112362  |

## ACETONITRILE

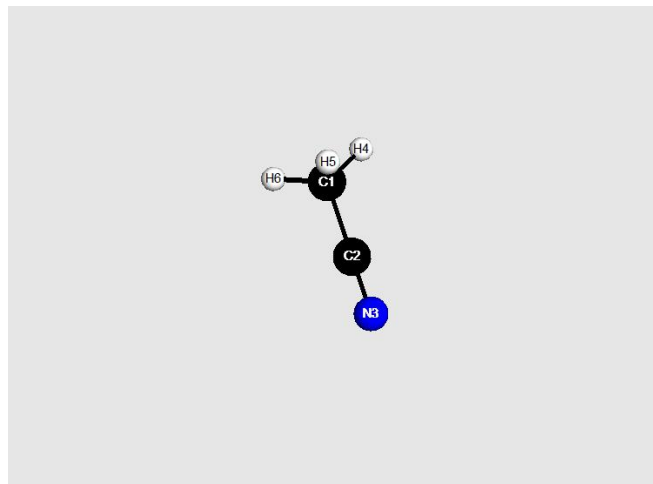

### HARTREE-FOCK

| Atom A | Atom B | Delocalization index |
|--------|--------|----------------------|
| C1     | C2     | 1.0053076296         |
| C1     | N3     | 0.086190688275       |
| C2     | N3     | 2.2397401565         |
| C1     | H4     | 0.9469505444         |
| C2     | H4     | 0.052330853826       |
| N3     | H4     | 0.021871622622       |
| C1     | H5     | 0.94689769506        |
| C2     | H5     | 0.052325922045       |
| N3     | H5     | 0.021875619767       |
| H4     | H5     | 0.034527095931       |
| C1     | H6     | 0.94686616371        |
| C2     | H6     | 0.052323024954       |
| N3     | H6     | 0.021875079991       |
| H4     | H6     | 0.034525966627       |
| H5     | H6     | 0.034524733539       |

### CCSD

| Atom A | Atom B | Delocalization index |
|--------|--------|----------------------|
| C1     | C2     | 0.89462147638        |
| C1     | N3     | 0.062599373511       |
| C2     | N3     | 1.9203267794         |
| C1     | H4     | 0.8170389731         |
| C2     | H4     | 0.0391831576         |
| N3     | H4     | 0.015810520731       |
| C1     | H5     | 0.81702329158        |
| C2     | H5     | 0.039194163839       |
| N3     | H5     | 0.015812625521       |
| H4     | H5     | 0.027979604757       |
| C1     | H6     | 0.81703254078        |
| C2     | H6     | 0.039206534825       |

|    |    |                |
|----|----|----------------|
| N3 | H6 | 0.0158130978   |
| H4 | H6 | 0.027970364184 |
| H5 | H6 | 0.027970408853 |

## ISOCYANOETHANE

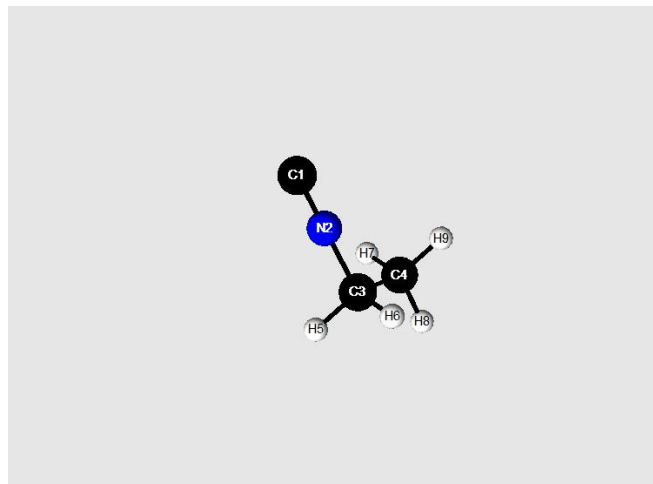

### HARTREE-FOCK

| Atom A | Atom B | Delocalization index |
|--------|--------|----------------------|
| C1     | N2     | 1.7845938794         |
| C1     | C3     | 0.030738165019       |
| N2     | C3     | 0.8032373197         |
| C1     | C4     | 0.012837097628       |
| N2     | C4     | 0.085264702575       |
| C3     | C4     | 0.95321014716        |
| C1     | H5     | 0.012968670959       |
| N2     | H5     | 0.076903220902       |
| C3     | H5     | 0.91660063214        |
| C4     | H5     | 0.035943344502       |
| C1     | H6     | 0.012968541534       |
| N2     | H6     | 0.076902395428       |
| C3     | H6     | 0.91657563195        |
| C4     | H6     | 0.035934720345       |
| H5     | H6     | 0.03458460251        |
| C1     | H7     | 0.001139757169       |
| N2     | H7     | 0.011341291877       |
| C3     | H7     | 0.041991438246       |
| C4     | H7     | 0.96080869474        |
| H5     | H7     | 0.0033909346709      |
| H6     | H7     | 0.010340685819       |
| C1     | H8     | 0.0022700310977      |
| N2     | H8     | 0.012815302066       |
| C3     | H8     | 0.043873750563       |
| C4     | H8     | 0.96491695031        |
| H5     | H8     | 0.0033037047561      |
| H6     | H8     | 0.0033038564115      |
| H7     | H8     | 0.040263477942       |
| C1     | H9     | 0.0011398225198      |
| N2     | H9     | 0.011341462749       |

|    |    |                 |
|----|----|-----------------|
| C3 | H9 | 0.041937711345  |
| C4 | H9 | 0.96082753521   |
| H5 | H9 | 0.010340651175  |
| H6 | H9 | 0.0033907663245 |
| H7 | H9 | 0.04020135291   |
| H8 | H9 | 0.040263087873  |

### CCSD

| Atom A | Atom B | Delocalization index |
|--------|--------|----------------------|
| C1     | N2     | 1.5899608144         |
| C1     | C3     | 0.028271834423       |
| N2     | C3     | 0.76364126391        |
| C1     | C4     | 0.010947359407       |
| N2     | C4     | 0.067272518719       |
| C3     | C4     | 0.82493561296        |
| C1     | H5     | 0.010641002695       |
| N2     | H5     | 0.0560852018         |
| C3     | H5     | 0.79108777257        |
| C4     | H5     | 0.02957084204        |
| C1     | H6     | 0.010641057379       |
| N2     | H6     | 0.05608483787        |
| C3     | H6     | 0.79091241908        |
| C4     | H6     | 0.029571271896       |
| H5     | H6     | 0.027546388686       |
| C1     | H7     | 0.001236840625       |
| N2     | H7     | 0.010424090211       |
| C3     | H7     | 0.033082300541       |
| C4     | H7     | 0.82574181655        |
| H5     | H7     | 0.002940308384       |
| H6     | H7     | 0.0083512349208      |
| C1     | H8     | 0.0022006485302      |
| N2     | H8     | 0.0096404352513      |
| C3     | H8     | 0.034663355281       |
| C4     | H8     | 0.82938691256        |
| H5     | H8     | 0.0029203570345      |
| H6     | H8     | 0.0029206285019      |
| H7     | H8     | 0.031239176038       |
| C1     | H9     | 0.0012369708127      |
| N2     | H9     | 0.010424800756       |
| C3     | H9     | 0.033065504056       |
| C4     | H9     | 0.82572184355        |
| H5     | H9     | 0.0083512456348      |
| H6     | H9     | 0.0029396390687      |
| H7     | H9     | 0.031300155268       |
| H8     | H9     | 0.031239054453       |

## ISOCYANOPROPANE

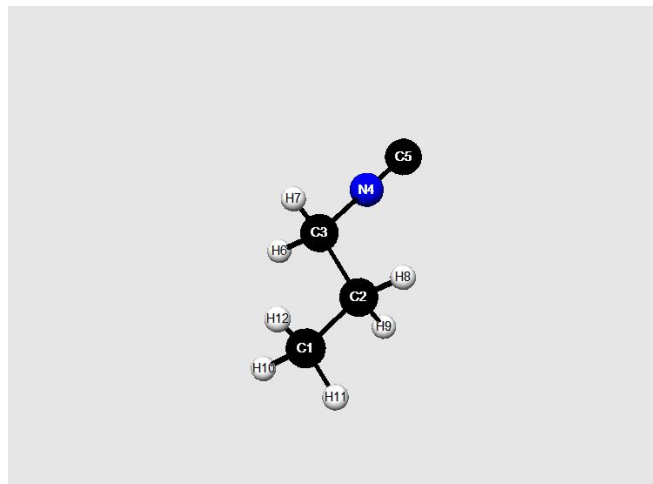

### HARTREE-FOCK

| Atom A | Atom B | Delocalization index |
|--------|--------|----------------------|
| C1     | C2     | 0.98135880094        |
| C1     | C3     | 0.046599759863       |
| C2     | C3     | 0.93681870529        |
| C1     | N4     | 0.011601601142       |
| C2     | N4     | 0.082263744119       |
| C3     | N4     | 0.80280190956        |
| C1     | C5     | 0.002104662056       |
| C2     | C5     | 0.012483490032       |
| C3     | C5     | 0.030676416227       |
| N4     | C5     | 1.7852751486         |
| C1     | H6     | 0.0070595091901      |
| C2     | H6     | 0.034041833089       |
| C3     | H6     | 0.91300725337        |
| N4     | H6     | 0.076715060419       |
| C5     | H6     | 0.012897913188       |
| C1     | H7     | 0.0070681420533      |
| C2     | H7     | 0.033999558758       |
| C3     | H7     | 0.91301691794        |
| N4     | H7     | 0.076713418177       |
| C5     | H7     | 0.012891817932       |
| H6     | H7     | 0.034766627102       |
| C1     | H8     | 0.040280992291       |
| C2     | H8     | 0.94731126037        |
| C3     | H8     | 0.042362249037       |
| N4     | H8     | 0.012718834253       |
| C5     | H8     | 0.0012682308654      |
| H6     | H8     | 0.0099991176288      |
| H7     | H8     | 0.0033916519632      |
| C1     | H9     | 0.040274899555       |
| C2     | H9     | 0.94717786005        |

|     |     |                  |
|-----|-----|------------------|
| C3  | H9  | 0.042366693123   |
| N4  | H9  | 0.012711720215   |
| C5  | H9  | 0.0012683512532  |
| H6  | H9  | 0.0033934717662  |
| H7  | H9  | 0.009999542299   |
| H8  | H9  | 0.040119774241   |
| C1  | C1  | 0.96343969355    |
| C2  | C1  | 0.042094688355   |
| C3  | C1  | 0.0069739484251  |
| N4  | C1  | 0.0010447458812  |
| C5  | C1  | 0.00022423032721 |
| H6  | C1  | 0.0058791848236  |
| H7  | C1  | 0.00047430165405 |
| H8  | C1  | 0.011134365738   |
| H9  | C1  | 0.0034510093081  |
| C1  | H11 | 0.96473571652    |
| C2  | H11 | 0.042187559461   |
| C3  | H11 | 0.010226889487   |
| N4  | H11 | 0.0021851608452  |
| C5  | H11 | 0.00046987014698 |
| H6  | H11 | 0.00082306123572 |
| H7  | H11 | 0.00082377233726 |
| H8  | H11 | 0.0036073227222  |
| H9  | H11 | 0.0036078071917  |
| C1  | H11 | 0.042681796753   |
| C1  | H12 | 0.96342183554    |
| C2  | H12 | 0.042050807376   |
| C3  | H12 | 0.0069673984689  |
| N4  | H12 | 0.0010445261872  |
| C5  | H12 | 0.00022421277551 |
| H6  | H12 | 0.0004739486659  |
| H7  | H12 | 0.0058818893309  |
| H8  | H12 | 0.0034512372354  |
| H9  | H12 | 0.011133931798   |
| C1  | H12 | 0.043606980036   |
| H11 | H12 | 0.042681910537   |

#### CCSD

| Atom A | Atom B | Delocalization index |
|--------|--------|----------------------|
| C1     | C2     | 0.84386279264        |
| C1     | C3     | 0.040236482625       |
| C2     | C3     | 0.80962180598        |
| C1     | N4     | 0.0086013275011      |
| C2     | N4     | 0.064398210108       |
| C3     | N4     | 0.76418724643        |
| C1     | C5     | 0.0019818988041      |
| C2     | C5     | 0.01060970953        |
| C3     | C5     | 0.028163033454       |



|    |     |                  |
|----|-----|------------------|
| N4 | C5  | 1.590112182      |
| C1 | H6  | 0.0068601731587  |
| C2 | H6  | 0.0278958442     |
| C3 | H6  | 0.78659595818    |
| N4 | H6  | 0.055717612507   |
| C5 | H6  | 0.010555314211   |
| C1 | H7  | 0.0068057533613  |
| C2 | H7  | 0.027863864346   |
| C3 | H7  | 0.78657488902    |
| N4 | H7  | 0.055716247992   |
| C5 | H7  | 0.010552628861   |
| H6 | H7  | 0.02755686485    |
| C1 | H8  | 0.032353736661   |
| C2 | H8  | 0.81201170717    |
| C3 | H8  | 0.033613511797   |
| N4 | H8  | 0.011626473588   |
| C5 | H8  | 0.0013480979669  |
| H6 | H8  | 0.008128317581   |
| H7 | H8  | 0.0029462990355  |
| C1 | H9  | 0.032351318412   |
| C2 | H9  | 0.81205950995    |
| C3 | H9  | 0.033526987194   |
| N4 | H9  | 0.011628787951   |
| C5 | H9  | 0.0013491576072  |
| H6 | H9  | 0.0029454998086  |
| H7 | H9  | 0.0081282577634  |
| H8 | H9  | 0.031144578637   |
| C1 | C1  | 0.82736681583    |
| C2 | C1  | 0.033231207318   |
| C3 | C1  | 0.0065402566721  |
| N4 | C1  | 0.00089571087484 |
| C5 | C1  | 0.00024738673411 |
| H6 | C1  | 0.006716941959   |
| H7 | C1  | 0.00050071642643 |
| H8 | C1  | 0.0088742011704  |
| H9 | C1  | 0.0029896911231  |
| C1 | H11 | 0.82926710037    |
| C2 | H11 | 0.033435732801   |
| C3 | H11 | 0.0079280944784  |
| N4 | H11 | 0.0017559118297  |
| C5 | H11 | 0.00048624017127 |
| H6 | H11 | 0.00074270630959 |
| H7 | H11 | 0.00074258840105 |
| H8 | H11 | 0.0030872074022  |
| H9 | H11 | 0.0030874477276  |
| C1 | H11 | 0.03301911046    |
| C1 | H12 | 0.82718680381    |
| C2 | H12 | 0.033188345719   |

|     |     |                  |
|-----|-----|------------------|
| C3  | H12 | 0.0065291640538  |
| N4  | H12 | 0.00089565782403 |
| C5  | H12 | 0.00024735004987 |
| H6  | H12 | 0.00050072303425 |
| H7  | H12 | 0.0067151203227  |
| H8  | H12 | 0.0029897955853  |
| H9  | H12 | 0.0088740870261  |
| C1  | H12 | 0.033721204181   |
| H11 | H12 | 0.033019218348   |

# DIAZOCOMPOUNDS

## DIAZOBENZENE

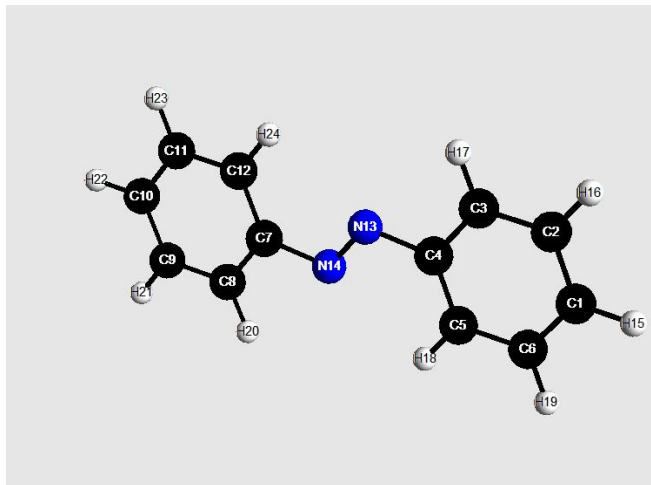

### HARTREE-FOCK

| Atom A | Atom B | Delocalization index |
|--------|--------|----------------------|
| C1     | C2     | 1.4026723114         |
| C1     | C3     | 0.074767622104       |
| C2     | C3     | 1.3752109881         |
| C1     | C4     | 0.087918267817       |
| C2     | C4     | 0.070979722739       |
| C3     | C4     | 1.3382416406         |
| C1     | C5     | 0.073532098951       |
| C2     | C5     | 0.096179268354       |
| C3     | C5     | 0.066659713258       |
| C4     | C5     | 1.3071103469         |
| C1     | C6     | 1.3626379267         |
| C2     | C6     | 0.07355157456        |
| C3     | C6     | 0.093091023927       |
| C4     | C6     | 0.073614574045       |
| C5     | C6     | 1.4150536967         |
| C1     | C7     | 0.00075342628573     |
| C2     | C7     | 0.000419605177       |
| C3     | C7     | 0.002153180809       |
| C4     | C7     | 0.013334274289       |
| C5     | C7     | 0.0020806190813      |
| C6     | C7     | 0.00024461046821     |
| C1     | C8     | 0.0016075220786      |
| C2     | C8     | 0.00027165687759     |
| C3     | C8     | 0.0024369659334      |
| C4     | C8     | 0.0021531866769      |
| C5     | C8     | 0.0019625193912      |
| C6     | C8     | 0.0002510771603      |
| C7     | C8     | 1.3382419298         |

|     |     |                  |
|-----|-----|------------------|
| C1  | C9  | 0.00017284129381 |
| C2  | C9  | 3.7386922346e-05 |
| C3  | C9  | 0.0002716566913  |
| C4  | C9  | 0.00041960518332 |
| C5  | C9  | 0.00020285863002 |
| C6  | C9  | 3.4658600117e-05 |
| C7  | C9  | 0.070979742425   |
| C8  | C9  | 1.3752109041     |
| C1  | C1  | 0.0012202946468  |
| C2  | C1  | 0.00017284063937 |
| C3  | C1  | 0.0016075225148  |
| C4  | C1  | 0.00075342701713 |
| C5  | C1  | 0.0013123334335  |
| C6  | C1  | 0.00016587961115 |
| C7  | C1  | 0.087918201138   |
| C8  | C1  | 0.074767593516   |
| C9  | C1  | 1.4026725633     |
| C1  | C11 | 0.0001658790372  |
| C2  | C11 | 3.4659098576e-05 |
| C3  | C11 | 0.00025107655367 |
| C4  | C11 | 0.00024460871864 |
| C5  | C11 | 0.00025448223432 |
| C6  | C11 | 3.3049818975e-05 |
| C7  | C11 | 0.073614556959   |
| C8  | C11 | 0.093091041369   |
| C9  | C11 | 0.073551513303   |
| C1  | C11 | 1.3626377608     |
| C1  | C12 | 0.0013123323774  |
| C2  | C12 | 0.00020285851869 |
| C3  | C12 | 0.0019625167775  |
| C4  | C12 | 0.00208064078    |
| C5  | C12 | 0.0019638377417  |
| C6  | C12 | 0.00025448387004 |
| C7  | C12 | 1.3071109229     |
| C8  | C12 | 0.066659672946   |
| C9  | C12 | 0.09617931982    |
| C1  | C12 | 0.073532051367   |
| C11 | C12 | 1.4150537706     |
| C1  | N13 | 0.0096023015227  |
| C2  | N13 | 0.0097992150406  |
| C3  | N13 | 0.090278500087   |
| C4  | N13 | 0.97051417145    |
| C5  | N13 | 0.069264027788   |
| C6  | N13 | 0.012007788486   |
| C7  | N13 | 0.068801075299   |
| C8  | N13 | 0.033253996367   |
| C9  | N13 | 0.0039641057374  |
| C1  | N13 | 0.015106037418   |

|     |     |                  |
|-----|-----|------------------|
| C11 | N13 | 0.0050560682668  |
| C12 | N13 | 0.049963058597   |
| C1  | N14 | 0.015106080664   |
| C2  | N14 | 0.0039641726588  |
| C3  | N14 | 0.033254017497   |
| C4  | N14 | 0.068801811343   |
| C5  | N14 | 0.049963035729   |
| C6  | N14 | 0.0050561444686  |
| C7  | N14 | 0.97051452838    |
| C8  | N14 | 0.090278871699   |
| C9  | N14 | 0.0097992171403  |
| C1  | N14 | 0.0096023119254  |
| C11 | N14 | 0.012007799147   |
| C12 | N14 | 0.069263999874   |
| N13 | N14 | 1.9900230963     |
| C1  | H15 | 0.97605658429    |
| C2  | H15 | 0.049315076806   |
| C3  | H15 | 0.0086356924179  |
| C4  | H15 | 0.0055695742308  |
| C5  | H15 | 0.0083830690058  |
| C6  | H15 | 0.04782553832    |
| C7  | H15 | 6.0256954922e-05 |
| C8  | H15 | 0.00011177175184 |
| C9  | H15 | 1.2081712755e-05 |
| C1  | H15 | 8.5859957984e-05 |
| C11 | H15 | 1.2218397282e-05 |
| C12 | H15 | 9.296621491e-05  |
| N13 | H15 | 0.00061435464134 |
| N14 | H15 | 0.001052305144   |
| C1  | H16 | 0.049410004752   |
| C2  | H16 | 0.97618685628    |
| C3  | H16 | 0.04883888804    |
| C4  | H16 | 0.008305067271   |
| C5  | H16 | 0.006007755291   |
| C6  | H16 | 0.0086357186336  |
| C7  | H16 | 7.5372855534e-05 |
| C8  | H16 | 1.7948675897e-05 |
| C9  | H16 | 3.8840897396e-06 |
| C1  | H16 | 6.4174298844e-06 |
| C11 | H16 | 2.6992493499e-06 |
| C12 | H16 | 9.3575535649e-06 |
| N13 | H16 | 0.0011614019998  |
| N14 | H16 | 0.00034906368357 |
| H15 | H16 | 0.0056107554473  |
| C1  | H17 | 0.0081555672812  |
| C2  | H17 | 0.045360630531   |
| C3  | H17 | 0.96505721702    |
| C4  | H17 | 0.044733923226   |

|     |     |                  |
|-----|-----|------------------|
| C5  | H17 | 0.0075570436791  |
| C6  | H17 | 0.0056523765361  |
| C7  | H17 | 0.00025040452157 |
| C8  | H17 | 0.00010262436887 |
| C9  | H17 | 1.4851201023e-05 |
| C1  | H17 | 6.4941149776e-05 |
| C11 | H17 | 1.7880403482e-05 |
| C12 | H17 | 0.0001356281353  |
| N13 | H17 | 0.021364683148   |
| N14 | H17 | 0.0025145171089  |
| H15 | H17 | 0.0012921038166  |
| H16 | H17 | 0.005469796598   |
| C1  | H18 | 0.0077556626046  |
| C2  | H18 | 0.00528615898    |
| C3  | H18 | 0.0073455303706  |
| C4  | H18 | 0.041375421106   |
| C5  | H18 | 0.95407302279    |
| C6  | H18 | 0.045282334574   |
| C7  | H18 | 0.0012372835177  |
| C8  | H18 | 0.00019389141092 |
| C9  | H18 | 1.8071492955e-05 |
| C1  | H18 | 5.6337684065e-05 |
| C11 | H18 | 6.7654224498e-05 |
| C12 | H18 | 0.00036682532844 |
| N13 | H18 | 0.0069847883991  |
| N14 | H18 | 0.033443638255   |
| H15 | H18 | 0.001179048695   |
| H16 | H18 | 0.00033716033961 |
| H17 | H18 | 0.0014980478433  |
| C1  | H19 | 0.048155192054   |
| C2  | H19 | 0.0084636322212  |
| C3  | H19 | 0.0058188917817  |
| C4  | H19 | 0.0084708123556  |
| C5  | H19 | 0.050433930452   |
| C6  | H19 | 0.9754377672     |
| C7  | H19 | 4.6938989385e-05 |
| C8  | H19 | 1.296839551e-05  |
| C9  | H19 | 2.4173265095e-06 |
| C1  | H19 | 7.5521480539e-06 |
| C11 | H19 | 2.2322668158e-06 |
| C12 | H19 | 2.4216747465e-05 |
| N13 | H19 | 0.0018875779053  |
| N14 | H19 | 0.00028446983625 |
| H15 | H19 | 0.0054845369426  |
| H16 | H19 | 0.0014080596491  |
| H17 | H19 | 0.00035876850724 |
| H18 | H19 | 0.0056453489727  |
| C1  | C2  | 6.4939858613e-05 |

|     |     |                  |
|-----|-----|------------------|
| C2  | C2  | 1.4850800638e-05 |
| C3  | C2  | 0.000102623231   |
| C4  | C2  | 0.00025040263589 |
| C5  | C2  | 0.0001356256673  |
| C6  | C2  | 1.7880166969e-05 |
| C7  | C2  | 0.044733638983   |
| C8  | C2  | 0.96505520681    |
| C9  | C2  | 0.045360418077   |
| C1  | C2  | 0.0081555253354  |
| C11 | C2  | 0.0056522977309  |
| C12 | C2  | 0.0075570353485  |
| N13 | C2  | 0.0025144955745  |
| N14 | C2  | 0.021364608859   |
| H15 | C2  | 4.6192095552e-06 |
| H16 | C2  | 1.7401377775e-06 |
| H17 | C2  | 1.2885646761e-05 |
| H18 | C2  | 0.00014908742051 |
| H19 | C2  | 1.9631526407e-06 |
| C1  | H21 | 6.4179601808e-06 |
| C2  | H21 | 3.8838179097e-06 |
| C3  | H21 | 1.7948959658e-05 |
| C4  | H21 | 7.537292998e-05  |
| C5  | H21 | 9.3579179965e-06 |
| C6  | H21 | 2.6998419221e-06 |
| C7  | H21 | 0.0083050537685  |
| C8  | H21 | 0.048838690374   |
| C9  | H21 | 0.97618638877    |
| C1  | H21 | 0.049409831134   |
| C11 | H21 | 0.0086356960332  |
| C12 | H21 | 0.0060077001162  |
| N13 | H21 | 0.00034905832433 |
| N14 | H21 | 0.0011614003832  |
| H15 | H21 | 4.7481121871e-07 |
| H16 | H21 | 8.9136170113e-07 |
| H17 | H21 | 1.7403360279e-06 |
| H18 | H21 | 1.7081297755e-06 |
| H19 | H21 | 3.0768767833e-07 |
| C2  | H21 | 0.0054697785167  |
| C1  | H22 | 8.5860183397e-05 |
| C2  | H22 | 1.2081699366e-05 |
| C3  | H22 | 0.00011177143249 |
| C4  | H22 | 6.0256455392e-05 |
| C5  | H22 | 9.2965400384e-05 |
| C6  | H22 | 1.2218706328e-05 |
| C7  | H22 | 0.0055695594917  |
| C8  | H22 | 0.0086356966388  |
| C9  | H22 | 0.049315070498   |
| C1  | H22 | 0.97605614655    |

|     |     |                  |
|-----|-----|------------------|
| C11 | H22 | 0.047825488997   |
| C12 | H22 | 0.0083830778953  |
| N13 | H22 | 0.0010522991983  |
| N14 | H22 | 0.00061435319125 |
| H15 | H22 | 5.7971994697e-06 |
| H16 | H22 | 4.7466537308e-07 |
| H17 | H22 | 4.6195182426e-06 |
| H18 | H22 | 3.8684037044e-06 |
| H19 | H22 | 6.58619744e-07   |
| C2  | H22 | 0.0012920981133  |
| H21 | H22 | 0.0056107444564  |
| C1  | H23 | 7.5520301241e-06 |
| C2  | H23 | 2.4169313538e-06 |
| C3  | H23 | 1.2968394902e-05 |
| C4  | H23 | 4.6938668992e-05 |
| C5  | H23 | 2.4215799329e-05 |
| C6  | H23 | 2.2320798607e-06 |
| C7  | H23 | 0.008470810174   |
| C8  | H23 | 0.0058188830321  |
| C9  | H23 | 0.0084636242003  |
| C1  | H23 | 0.048155153452   |
| C11 | H23 | 0.97543749719    |
| C12 | H23 | 0.05043390654    |
| N13 | H23 | 0.00028446593184 |
| N14 | H23 | 0.0018875769683  |
| H15 | H23 | 6.5858161671e-07 |
| H16 | H23 | 3.075997037e-07  |
| H17 | H23 | 1.9631847124e-06 |
| H18 | H23 | 2.188743735e-05  |
| H19 | H23 | 5.3560017776e-07 |
| C2  | H23 | 0.000358763619   |
| H21 | H23 | 0.0014080577064  |
| H22 | H23 | 0.0054845318731  |
| C1  | H24 | 5.6337539843e-05 |
| C2  | H24 | 1.807142693e-05  |
| C3  | H24 | 0.00019388849061 |
| C4  | H24 | 0.0012372722084  |
| C5  | H24 | 0.00036682236898 |
| C6  | H24 | 6.7653205198e-05 |
| C7  | H24 | 0.041375548453   |
| C8  | H24 | 0.0073455243657  |
| C9  | H24 | 0.0052861967176  |
| C1  | H24 | 0.0077556653782  |
| C11 | H24 | 0.045282337745   |
| C12 | H24 | 0.95407576613    |
| N13 | H24 | 0.033443438324   |
| N14 | H24 | 0.0069847052834  |
| H15 | H24 | 3.8686024108e-06 |



|     |     |                  |
|-----|-----|------------------|
| H16 | H24 | 1.7080897759e-06 |
| H17 | H24 | 0.00014908728021 |
| H18 | H24 | 4.1211246169e-05 |
| H19 | H24 | 2.188732246e-05  |
| C2  | H24 | 0.0014980473122  |
| H21 | H24 | 0.00033716004057 |
| H22 | H24 | 0.0011790482399  |
| H23 | H24 | 0.0056453517664  |

## O-HYDROXYDIAZOBENZENE

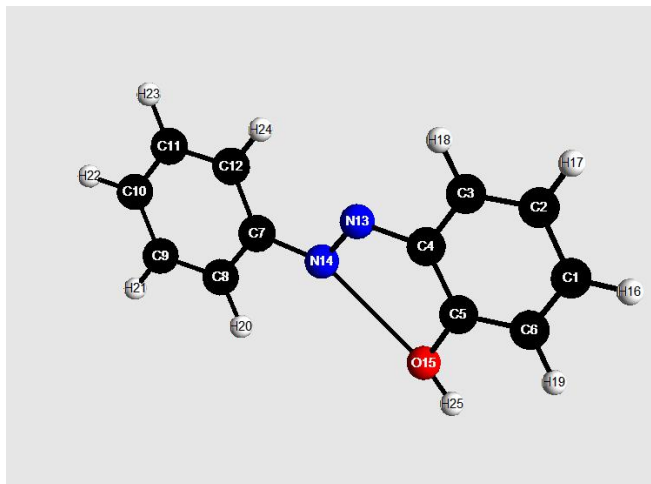

### HARTREE-FOCK

| Atom A | Atom B | Delocalization index |
|--------|--------|----------------------|
| C1     | C2     | 1.3809450324         |
| C1     | C3     | 0.079833495386       |
| C2     | C3     | 1.3933317781         |
| C1     | C4     | 0.082954631023       |
| C2     | C4     | 0.067140051181       |
| C3     | C4     | 1.3186105643         |
| C1     | C5     | 0.071605904072       |
| C2     | C5     | 0.080796888781       |
| C3     | C5     | 0.068366005672       |
| C4     | C5     | 1.2423329141         |
| C1     | C6     | 1.387396658          |
| C2     | C6     | 0.072775139306       |
| C3     | C6     | 0.092297320158       |
| C4     | C6     | 0.063053568107       |
| C5     | C6     | 1.311184229          |
| C1     | C7     | 0.00072798991032     |
| C2     | C7     | 0.0003820953843      |
| C3     | C7     | 0.0020590822787      |
| C4     | C7     | 0.013624846133       |
| C5     | C7     | 0.0014221409107      |
| C6     | C7     | 0.00028085177913     |
| C1     | C8     | 0.0015750672102      |
| C2     | C8     | 0.00029247227769     |
| C3     | C8     | 0.0023014201933      |
| C4     | C8     | 0.0024158666288      |
| C5     | C8     | 0.0019697143074      |
| C6     | C8     | 0.0002206670862      |
| C7     | C8     | 1.3378798677         |
| C1     | C9     | 0.0001686500053      |
| C2     | C9     | 4.1746196606e-05     |

|     |     |                  |
|-----|-----|------------------|
| C3  | C9  | 0.00025698279851 |
| C4  | C9  | 0.00046584324589 |
| C5  | C9  | 0.0002060328749  |
| C6  | C9  | 2.9553955599e-05 |
| C7  | C9  | 0.071123591603   |
| C8  | C9  | 1.3762245201     |
| C1  | C1  | 0.0012001150387  |
| C2  | C1  | 0.00018813306678 |
| C3  | C1  | 0.0015139228184  |
| C4  | C1  | 0.00089437840826 |
| C5  | C1  | 0.0013415528092  |
| C6  | C1  | 0.00015380687404 |
| C7  | C1  | 0.088201064079   |
| C8  | C1  | 0.074514303772   |
| C9  | C1  | 1.4020203016     |
| C1  | C11 | 0.00016503185799 |
| C2  | C11 | 3.4067314795e-05 |
| C3  | C11 | 0.00024261223205 |
| C4  | C11 | 0.00025765919619 |
| C5  | C11 | 0.00022045218375 |
| C6  | C11 | 2.5634710202e-05 |
| C7  | C11 | 0.073360652011   |
| C8  | C11 | 0.093230071828   |
| C9  | C11 | 0.073599598497   |
| C1  | C11 | 1.3638986929     |
| C1  | C12 | 0.0012976523695  |
| C2  | C12 | 0.00022161162457 |
| C3  | C12 | 0.0018872692482  |
| C4  | C12 | 0.0022316275509  |
| C5  | C12 | 0.0018250959785  |
| C6  | C12 | 0.00021570757082 |
| C7  | C12 | 1.3088824088     |
| C8  | C12 | 0.067048199953   |
| C9  | C12 | 0.096220029186   |
| C1  | C12 | 0.073352300991   |
| C11 | C12 | 1.4141829272     |
| C1  | N13 | 0.0088933707344  |
| C2  | N13 | 0.01009643526    |
| C3  | N13 | 0.092388590379   |
| C4  | N13 | 0.99957256052    |
| C5  | N13 | 0.066701093999   |
| C6  | N13 | 0.0091534332633  |
| C7  | N13 | 0.07006194212    |
| C8  | N13 | 0.032465593184   |
| C9  | N13 | 0.0039153474006  |
| C1  | N13 | 0.014633924485   |
| C11 | N13 | 0.0050630014094  |
| C12 | N13 | 0.050102262071   |

|     |     |                  |
|-----|-----|------------------|
| C1  | N14 | 0.014726934809   |
| C2  | N14 | 0.0038773744809  |
| C3  | N14 | 0.032224492348   |
| C4  | N14 | 0.068174886856   |
| C5  | N14 | 0.027749462817   |
| C6  | N14 | 0.0025557090517  |
| C7  | N14 | 0.9757907751     |
| C8  | N14 | 0.088935912834   |
| C9  | N14 | 0.0096785090758  |
| C1  | N14 | 0.0092985780298  |
| C11 | N14 | 0.011894733192   |
| C12 | N14 | 0.068362785591   |
| N13 | N14 | 1.9781152952     |
| C1  | O15 | 0.015144351225   |
| C2  | O15 | 0.019241294776   |
| C3  | O15 | 0.011010295152   |
| C4  | O15 | 0.092533621553   |
| C5  | O15 | 0.84423390121    |
| C6  | O15 | 0.12095572759    |
| C7  | O15 | 0.0021508647606  |
| C8  | O15 | 0.00073380681542 |
| C9  | O15 | 7.1797860426e-05 |
| C1  | O15 | 0.00032185376142 |
| C11 | O15 | 0.00015691290309 |
| C12 | O15 | 0.00089234734375 |
| N13 | O15 | 0.013185859607   |
| N14 | O15 | 0.070180909086   |
| C1  | H16 | 0.97338094175    |
| C2  | H16 | 0.046828118138   |
| C3  | H16 | 0.0087070146722  |
| C4  | H16 | 0.005233274032   |
| C5  | H16 | 0.0081753553428  |
| C6  | H16 | 0.049091618087   |
| C7  | H16 | 5.6079065188e-05 |
| C8  | H16 | 0.00011105898182 |
| C9  | H16 | 1.1944701423e-05 |
| C1  | H16 | 8.5950222541e-05 |
| C11 | H16 | 1.202718069e-05  |
| C12 | H16 | 9.1410326964e-05 |
| N13 | H16 | 0.00057076557916 |
| N14 | H16 | 0.00095500666465 |
| O15 | H16 | 0.0016366167296  |
| C1  | H17 | 0.049255074862   |
| C2  | H17 | 0.9785480772     |
| C3  | H17 | 0.050005493889   |
| C4  | H17 | 0.0085037292769  |
| C5  | H17 | 0.0052674529058  |
| C6  | H17 | 0.0088966217723  |

|     |     |                  |
|-----|-----|------------------|
| C7  | H17 | 7.3071583502e-05 |
| C8  | H17 | 2.0383703997e-05 |
| C9  | H17 | 4.1754996014e-06 |
| C1  | H17 | 8.8941965205e-06 |
| C11 | H17 | 3.2818218554e-06 |
| C12 | H17 | 1.2705462142e-05 |
| N13 | H17 | 0.0010902858379  |
| N14 | H17 | 0.00036554738992 |
| O15 | H17 | 0.0014902211964  |
| H16 | H17 | 0.0053860907525  |
| C1  | H18 | 0.0083966214968  |
| C2  | H18 | 0.044846610764   |
| C3  | H18 | 0.95973104019    |
| C4  | H18 | 0.043606767509   |
| C5  | H18 | 0.0072047326537  |
| C6  | H18 | 0.0055260324413  |
| C7  | H18 | 0.00030566219742 |
| C8  | H18 | 9.7087519363e-05 |
| C9  | H18 | 1.5974342315e-05 |
| C1  | H18 | 5.7439567701e-05 |
| C11 | H18 | 2.279840037e-05  |
| C12 | H18 | 0.00016182498379 |
| N13 | H18 | 0.026047059291   |
| N14 | H18 | 0.0027643141907  |
| O15 | H18 | 0.0015341118433  |
| H16 | H18 | 0.0014187456673  |
| H17 | H18 | 0.0055498752157  |
| C1  | H19 | 0.048339257057   |
| C2  | H19 | 0.0086524033648  |
| C3  | H19 | 0.0061435096866  |
| C4  | H19 | 0.0068452179636  |
| C5  | H19 | 0.050213735948   |
| C6  | H19 | 0.97180267267    |
| C7  | H19 | 4.3689757687e-05 |
| C8  | H19 | 1.1527840093e-05 |
| C9  | H19 | 2.1873274648e-06 |
| C1  | H19 | 5.0850519915e-06 |
| C11 | H19 | 2.4415416659e-06 |
| C12 | H19 | 2.3070026721e-05 |
| N13 | H19 | 0.002039703454   |
| N14 | H19 | 0.00028902082917 |
| O15 | H19 | 0.01926248444    |
| H16 | H19 | 0.005991767968   |
| H17 | H19 | 0.0013911667987  |
| H18 | H19 | 0.0003509325253  |
| C1  | C2  | 6.1865669278e-05 |
| C2  | C2  | 1.5895205522e-05 |
| C3  | C2  | 9.646834733e-05  |

|     |     |                  |
|-----|-----|------------------|
| C4  | C2  | 0.00024127665735 |
| C5  | C2  | 0.00010285811043 |
| C6  | C2  | 1.9070723098e-05 |
| C7  | C2  | 0.044285670715   |
| C8  | C2  | 0.96409095824    |
| C9  | C2  | 0.045179978673   |
| C1  | C2  | 0.0081197339461  |
| C11 | C2  | 0.0055786491604  |
| C12 | C2  | 0.0074920326199  |
| N13 | C2  | 0.0023655833526  |
| N14 | C2  | 0.020600414834   |
| O15 | C2  | 0.00053212974028 |
| H16 | C2  | 4.8081926021e-06 |
| H17 | C2  | 1.4392101892e-06 |
| H18 | C2  | 1.3827485162e-05 |
| H19 | C2  | 2.5908134077e-06 |
| C1  | H21 | 6.246808568e-06  |
| C2  | H21 | 3.7937199012e-06 |
| C3  | H21 | 1.6429628479e-05 |
| C4  | H21 | 7.8796696378e-05 |
| C5  | H21 | 9.9910224102e-06 |
| C6  | H21 | 2.3964130971e-06 |
| C7  | H21 | 0.0083304231799  |
| C8  | H21 | 0.048958654531   |
| C9  | H21 | 0.97672223219    |
| C1  | H21 | 0.049620219342   |
| C11 | H21 | 0.0086743102671  |
| C12 | H21 | 0.0060568452067  |
| N13 | H21 | 0.0003466111897  |
| N14 | H21 | 0.0011496334653  |
| O15 | H21 | 7.4360671644e-06 |
| H16 | H21 | 4.5471950967e-07 |
| H17 | H21 | 8.0191841094e-07 |
| H18 | H21 | 2.2918271072e-06 |
| H19 | H21 | 4.4661582889e-07 |
| C2  | H21 | 0.0054571245674  |
| C1  | H22 | 8.465078406e-05  |
| C2  | H22 | 1.3766607853e-05 |
| C3  | H22 | 0.00010604538478 |
| C4  | H22 | 7.2499244548e-05 |
| C5  | H22 | 9.5865189557e-05 |
| C6  | H22 | 1.0937429691e-05 |
| C7  | H22 | 0.0056466098999  |
| C8  | H22 | 0.0086564318409  |
| C9  | H22 | 0.049488877229   |
| C1  | H22 | 0.97672493555    |
| C11 | H22 | 0.048103226783   |
| C12 | H22 | 0.0084232703061  |

|     |     |                  |
|-----|-----|------------------|
| N13 | H22 | 0.0010380677662  |
| N14 | H22 | 0.0006042538587  |
| O15 | H22 | 2.3736938864e-05 |
| H16 | H22 | 5.8117828457e-06 |
| H17 | H22 | 6.8719279011e-07 |
| H18 | H22 | 4.3337668126e-06 |
| H19 | H22 | 5.1055796465e-07 |
| C2  | H22 | 0.0012916934889  |
| H21 | H22 | 0.0056345035079  |
| C1  | H23 | 7.3431428899e-06 |
| C2  | H23 | 2.3230526291e-06 |
| C3  | H23 | 1.3145421673e-05 |
| C4  | H23 | 4.8323730557e-05 |
| C5  | H23 | 1.182316765e-05  |
| C6  | H23 | 1.956498265e-06  |
| C7  | H23 | 0.0084768427127  |
| C8  | H23 | 0.0058895063591  |
| C9  | H23 | 0.0085123640976  |
| C1  | H23 | 0.048434025518   |
| C11 | H23 | 0.97604173806    |
| C12 | H23 | 0.050593389998   |
| N13 | H23 | 0.00029445297501 |
| N14 | H23 | 0.0019030934083  |
| O15 | H23 | 3.8701327722e-05 |
| H16 | H23 | 5.4176103235e-07 |
| H17 | H23 | 3.4697535832e-07 |
| H18 | H23 | 2.2963410305e-06 |
| H19 | H23 | 3.797313951e-07  |
| C2  | H23 | 0.00035624025132 |
| H21 | H23 | 0.0014205197292  |
| H22 | H23 | 0.0055169409936  |
| C1  | H24 | 5.7375941103e-05 |
| C2  | H24 | 2.1937878206e-05 |
| C3  | H24 | 0.0002410306759  |
| C4  | H24 | 0.0012702172714  |
| C5  | H24 | 0.00038179862331 |
| C6  | H24 | 6.3297913029e-05 |
| C7  | H24 | 0.041463039129   |
| C8  | H24 | 0.0073824522846  |
| C9  | H24 | 0.0053439680105  |
| C1  | H24 | 0.0077806063913  |
| C11 | H24 | 0.045593510895   |
| C12 | H24 | 0.95481366201    |
| N13 | H24 | 0.034021522635   |
| N14 | H24 | 0.0070291834176  |
| O15 | H24 | 7.4448864896e-05 |
| H16 | H24 | 4.6603161468e-06 |
| H17 | H24 | 2.6070776774e-06 |

|     |     |                  |
|-----|-----|------------------|
| H18 | H24 | 0.00024597473998 |
| H19 | H24 | 2.0106148167e-05 |
| C2  | H24 | 0.0014916330972  |
| H21 | H24 | 0.00034387567641 |
| H22 | H24 | 0.0011877875435  |
| H23 | H24 | 0.005680292387   |
| C1  | H25 | 0.00048415940065 |
| C2  | H25 | 0.00028298407061 |
| C3  | H25 | 0.00073517751037 |
| C4  | H25 | 0.0053741054459  |
| C5  | H25 | 0.010421042965   |
| C6  | H25 | 0.0062472364674  |
| C7  | H25 | 8.9791898601e-05 |
| C8  | H25 | 1.0899908527e-05 |
| C9  | H25 | 6.9932284155e-07 |
| C1  | H25 | 2.9290326123e-06 |
| C11 | H25 | 4.9583902552e-06 |
| C12 | H25 | 2.9947057092e-05 |
| N13 | H25 | 0.00025992649344 |
| N14 | H25 | 0.0017528206979  |
| O15 | H25 | 0.57631370331    |
| H16 | H25 | 6.416107164e-05  |
| H17 | H25 | 4.985929364e-05  |
| H18 | H25 | 0.0002162060089  |
| H19 | H25 | 0.0053413559391  |
| C2  | H25 | 4.4386978372e-06 |
| H21 | H25 | 1.5861534141e-07 |
| H22 | H25 | 2.3147527087e-07 |
| H23 | H25 | 2.2691084247e-06 |
| H24 | H25 | 6.4025273765e-06 |



## M-HYDROXYDIAZOBENZENE

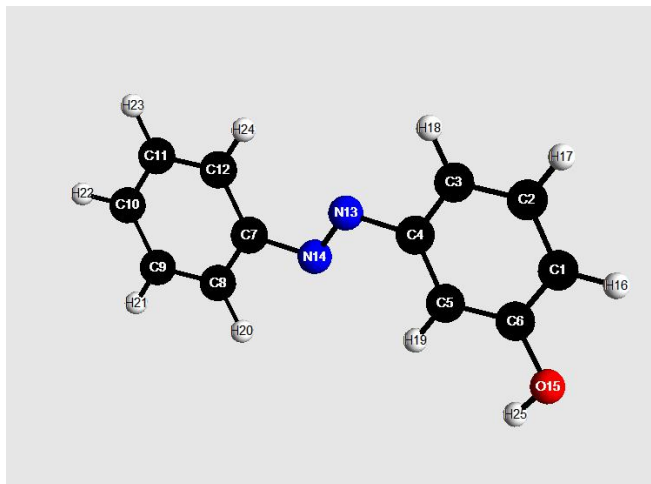

### HARTREE-FOCK

| Atom A | Atom B | Delocalization index |
|--------|--------|----------------------|
| C1     | C2     | 1.4241249427         |
| C1     | C3     | 0.07115273393        |
| C2     | C3     | 1.3558859278         |
| C1     | C4     | 0.086023157115       |
| C2     | C4     | 0.074253128404       |
| C3     | C4     | 1.3514478483         |
| C1     | C5     | 0.063763340407       |
| C2     | C5     | 0.092453871612       |
| C3     | C5     | 0.066931301808       |
| C4     | C5     | 1.2988636641         |
| C1     | C6     | 1.2737262285         |
| C2     | C6     | 0.075832132692       |
| C3     | C6     | 0.080553251353       |
| C4     | C6     | 0.073263551068       |
| C5     | C6     | 1.3540352867         |
| C1     | C7     | 0.00075239572058     |
| C2     | C7     | 0.00043581158575     |
| C3     | C7     | 0.0021965217263      |
| C4     | C7     | 0.01337693024        |
| C5     | C7     | 0.0020587659419      |
| C6     | C7     | 0.00024931113386     |
| C1     | C8     | 0.0016300244913      |
| C2     | C8     | 0.00028288776495     |
| C3     | C8     | 0.0026136096603      |
| C4     | C8     | 0.0020778957793      |
| C5     | C8     | 0.0017676172266      |
| C6     | C8     | 0.00023785282777     |
| C7     | C8     | 1.3380393627         |
| C1     | C9     | 0.00017558282691     |
| C2     | C9     | 3.8159614066e-05     |

|     |     |                  |
|-----|-----|------------------|
| C3  | C9  | 0.00028980918763 |
| C4  | C9  | 0.00041202704051 |
| C5  | C9  | 0.00018433275425 |
| C6  | C9  | 3.3258895936e-05 |
| C7  | C9  | 0.070883696081   |
| C8  | C9  | 1.3751998477     |
| C1  | C1  | 0.0012385177224  |
| C2  | C1  | 0.00018152048121 |
| C3  | C1  | 0.0017407256769  |
| C4  | C1  | 0.00070192823011 |
| C5  | C1  | 0.0011740191755  |
| C6  | C1  | 0.00015696409388 |
| C7  | C1  | 0.0878444024     |
| C8  | C1  | 0.074892304994   |
| C9  | C1  | 1.4026594367     |
| C1  | C11 | 0.00016737980464 |
| C2  | C11 | 3.6262260416e-05 |
| C3  | C11 | 0.00026894649461 |
| C4  | C11 | 0.00023603659413 |
| C5  | C11 | 0.00023653998657 |
| C6  | C11 | 3.1984653768e-05 |
| C7  | C11 | 0.073681070785   |
| C8  | C11 | 0.093047240605   |
| C9  | C11 | 0.073482414941   |
| C1  | C11 | 1.3624241652     |
| C1  | C12 | 0.0013249713012  |
| C2  | C12 | 0.00020903023312 |
| C3  | C12 | 0.0021032917516  |
| C4  | C12 | 0.0020243791574  |
| C5  | C12 | 0.001823806812   |
| C6  | C12 | 0.00024650251224 |
| C7  | C12 | 1.306635199      |
| C8  | C12 | 0.066590487101   |
| C9  | C12 | 0.096107074873   |
| C1  | C12 | 0.073665203944   |
| C11 | C12 | 1.4151467919     |
| C1  | N13 | 0.0098125291785  |
| C2  | N13 | 0.010031895349   |
| C3  | N13 | 0.090937759556   |
| C4  | N13 | 0.96927847651    |
| C5  | N13 | 0.068652277603   |
| C6  | N13 | 0.011820770687   |
| C7  | N13 | 0.068620818455   |
| C8  | N13 | 0.033355443651   |
| C9  | N13 | 0.0039752570775  |
| C1  | N13 | 0.015195942985   |
| C11 | N13 | 0.0050533813037  |
| C12 | N13 | 0.050041754295   |

|     |     |                  |
|-----|-----|------------------|
| C1  | N14 | 0.015252849436   |
| C2  | N14 | 0.0041028210769  |
| C3  | N14 | 0.035084527095   |
| C4  | N14 | 0.067921411462   |
| C5  | N14 | 0.049087256696   |
| C6  | N14 | 0.00516728129    |
| C7  | N14 | 0.9692666103     |
| C8  | N14 | 0.090606226381   |
| C9  | N14 | 0.0098252182973  |
| C1  | N14 | 0.0097449522395  |
| C11 | N14 | 0.012026939751   |
| C12 | N14 | 0.069438472002   |
| N13 | N14 | 1.9898589706     |
| C1  | O15 | 0.10610103563    |
| C2  | O15 | 0.013219123787   |
| C3  | O15 | 0.018000887225   |
| C4  | O15 | 0.014612218638   |
| C5  | O15 | 0.11996481633    |
| C6  | O15 | 0.83026205581    |
| C7  | O15 | 7.0798212094e-05 |
| C8  | O15 | 3.9485309821e-05 |
| C9  | O15 | 7.4551713785e-06 |
| C1  | O15 | 2.547225058e-05  |
| C11 | O15 | 5.6207757333e-06 |
| C12 | O15 | 4.8697743337e-05 |
| N13 | O15 | 0.002876781796   |
| N14 | O15 | 0.00080681774468 |
| C1  | H16 | 0.96798070424    |
| C2  | H16 | 0.046945987919   |
| C3  | H16 | 0.008313305439   |
| C4  | H16 | 0.0052060017863  |
| C5  | H16 | 0.0065286542039  |
| C6  | H16 | 0.044828529733   |
| C7  | H16 | 5.8199667799e-05 |
| C8  | H16 | 0.00010406523882 |
| C9  | H16 | 1.1307285397e-05 |
| C1  | H16 | 8.092784111e-05  |
| C11 | H16 | 1.1441031938e-05 |
| C12 | H16 | 8.6612762143e-05 |
| N13 | H16 | 0.00056558130248 |
| N14 | H16 | 0.0010134480818  |
| O15 | H16 | 0.015379654004   |
| C1  | H17 | 0.050095193608   |
| C2  | H17 | 0.97383844545    |
| C3  | H17 | 0.047071469548   |
| C4  | H17 | 0.0083306415991  |
| C5  | H17 | 0.0057388404219  |
| C6  | H17 | 0.0085133138682  |

|     |     |                  |
|-----|-----|------------------|
| C7  | H17 | 8.04883151e-05   |
| C8  | H17 | 1.7647368759e-05 |
| C9  | H17 | 3.8759863385e-06 |
| C1  | H17 | 6.2128324312e-06 |
| C11 | H17 | 2.6648222038e-06 |
| C12 | H17 | 8.8428228137e-06 |
| N13 | H17 | 0.0012136552191  |
| N14 | H17 | 0.00034976830869 |
| O15 | H17 | 0.0014545583618  |
| H16 | H17 | 0.0057586773155  |
| C1  | H18 | 0.0081602196752  |
| C2  | H18 | 0.045234436504   |
| C3  | H18 | 0.967460961      |
| C4  | H18 | 0.046129825635   |
| C5  | H18 | 0.0079901114647  |
| C6  | H18 | 0.0051533747524  |
| C7  | H18 | 0.000247237274   |
| C8  | H18 | 0.00011253710462 |
| C9  | H18 | 1.5889286033e-05 |
| C1  | H18 | 7.2835991918e-05 |
| C11 | H18 | 1.872550259e-05  |
| C12 | H18 | 0.00014230098722 |
| N13 | H18 | 0.020959685167   |
| N14 | H18 | 0.0025694765445  |
| O15 | H18 | 0.0014048908441  |
| H16 | H18 | 0.0011979309626  |
| H17 | H18 | 0.0053253094236  |
| C1  | H19 | 0.0065380675851  |
| C2  | H19 | 0.0054043059437  |
| C3  | H19 | 0.0074416245786  |
| C4  | H19 | 0.040260526379   |
| C5  | H19 | 0.95199425545    |
| C6  | H19 | 0.046464968045   |
| C7  | H19 | 0.0012915240996  |
| C8  | H19 | 0.0001986603831  |
| C9  | H19 | 1.8383913165e-05 |
| C1  | H19 | 5.3596339448e-05 |
| C11 | H19 | 7.0011134496e-05 |
| C12 | H19 | 0.00037965516856 |
| N13 | H19 | 0.0073651265679  |
| N14 | H19 | 0.035090111943   |
| O15 | H19 | 0.015396569319   |
| H16 | H19 | 0.0014679175034  |
| H17 | H19 | 0.00031459668808 |
| H18 | H19 | 0.0014663573728  |
| C1  | C2  | 6.5138220269e-05 |
| C2  | C2  | 1.5296131768e-05 |
| C3  | C2  | 0.00010912485877 |

|     |     |                  |
|-----|-----|------------------|
| C4  | C2  | 0.00024993006715 |
| C5  | C2  | 0.0001340080238  |
| C6  | C2  | 1.8409265413e-05 |
| C7  | C2  | 0.044839729465   |
| C8  | C2  | 0.96537792534    |
| C9  | C2  | 0.04542821592    |
| C1  | C2  | 0.0081693920697  |
| C11 | C2  | 0.0056776207154  |
| C12 | C2  | 0.0075784604674  |
| N13 | C2  | 0.0025304914108  |
| N14 | C2  | 0.021420780131   |
| O15 | C2  | 7.7053182296e-06 |
| H16 | C2  | 4.4145725187e-06 |
| H17 | C2  | 1.8446357108e-06 |
| H18 | C2  | 1.2982478484e-05 |
| H19 | C2  | 0.00016178031876 |
| C1  | H21 | 6.436537726e-06  |
| C2  | H21 | 4.027944403e-06  |
| C3  | H21 | 1.8448775552e-05 |
| C4  | H21 | 7.593398329e-05  |
| C5  | H21 | 8.6949998562e-06 |
| C6  | H21 | 2.4595381541e-06 |
| C7  | H21 | 0.0083019030005  |
| C8  | H21 | 0.048842029633   |
| C9  | H21 | 0.97608784658    |
| C1  | H21 | 0.04936843645    |
| C11 | H21 | 0.0086233914956  |
| C12 | H21 | 0.0059942784748  |
| N13 | H21 | 0.00035006486588 |
| N14 | H21 | 0.0011645919545  |
| O15 | H21 | 1.2704416677e-06 |
| H16 | H21 | 4.3945922481e-07 |
| H17 | H21 | 9.3678372348e-07 |
| H18 | H21 | 1.7626459206e-06 |
| H19 | H21 | 1.7921962846e-06 |
| C2  | H21 | 0.0054749074607  |
| C1  | H22 | 8.7403536845e-05 |
| C2  | H22 | 1.2363713377e-05 |
| C3  | H22 | 0.00012144314864 |
| C4  | H22 | 5.498977484e-05  |
| C5  | H22 | 8.1946033405e-05 |
| C6  | H22 | 1.1444215898e-05 |
| C7  | H22 | 0.0055427191059  |
| C8  | H22 | 0.0086259439222  |
| C9  | H22 | 0.049245122799   |
| C1  | H22 | 0.97584249501    |
| C11 | H22 | 0.047725206284   |
| C12 | H22 | 0.008368926595   |

|     |     |                  |
|-----|-----|------------------|
| N13 | H22 | 0.0010523800018  |
| N14 | H22 | 0.00061818500554 |
| O15 | H22 | 2.3004193532e-06 |
| H16 | H22 | 5.4571485978e-06 |
| H17 | H22 | 4.4102682546e-07 |
| H18 | H22 | 5.1690836715e-06 |
| H19 | H22 | 3.6793653737e-06 |
| C2  | H22 | 0.0012927574576  |
| H21 | H22 | 0.0056029084594  |
| C1  | H23 | 7.0836802471e-06 |
| C2  | H23 | 2.4640181142e-06 |
| C3  | H23 | 1.3222262345e-05 |
| C4  | H23 | 4.6575569407e-05 |
| C5  | H23 | 2.421544302e-05  |
| C6  | H23 | 2.3652527338e-06 |
| C7  | H23 | 0.0084650512298  |
| C8  | H23 | 0.005791486653   |
| C9  | H23 | 0.0084436795957  |
| C1  | H23 | 0.048067561373   |
| C11 | H23 | 0.97518229647    |
| C12 | H23 | 0.050368036065   |
| N13 | H23 | 0.00028236571669 |
| N14 | H23 | 0.0018824349728  |
| O15 | H23 | 1.2700817018e-06 |
| H16 | H23 | 6.5528584909e-07 |
| H17 | H23 | 3.365752853e-07  |
| H18 | H23 | 1.9050884865e-06 |
| H19 | H23 | 2.2922694186e-05 |
| C2  | H23 | 0.00035903223163 |
| H21 | H23 | 0.0014038742656  |
| H22 | H23 | 0.0054734903995  |
| C1  | H24 | 5.7614011725e-05 |
| C2  | H24 | 1.8383131891e-05 |
| C3  | H24 | 0.00020360285025 |
| C4  | H24 | 0.0012341312074  |
| C5  | H24 | 0.00035935319058 |
| C6  | H24 | 6.5536080155e-05 |
| C7  | H24 | 0.041297185014   |
| C8  | H24 | 0.0073347043977  |
| C9  | H24 | 0.005254839475   |
| C1  | H24 | 0.0077438195274  |
| C11 | H24 | 0.045121327867   |
| C12 | H24 | 0.95370657587    |
| N13 | H24 | 0.033292637566   |
| N14 | H24 | 0.006948872639   |
| O15 | H24 | 2.8833497303e-05 |
| H16 | H24 | 3.5708929374e-06 |
| H17 | H24 | 1.67311624e-06   |

|     |     |                  |
|-----|-----|------------------|
| H18 | H24 | 0.00014424178341 |
| H19 | H24 | 4.4186065826e-05 |
| C2  | H24 | 0.0014986458476  |
| H21 | H24 | 0.00033476145657 |
| H22 | H24 | 0.0011751618566  |
| H23 | H24 | 0.0056286457956  |
| C1  | H25 | 0.0055871580141  |
| C2  | H25 | 0.00093617429446 |
| C3  | H25 | 0.00022922906269 |
| C4  | H25 | 0.00039635220321 |
| C5  | H25 | 0.0050520646649  |
| C6  | H25 | 0.010102350856   |
| C7  | H25 | 3.3348857566e-06 |
| C8  | H25 | 2.1323607872e-06 |
| C9  | H25 | 3.5489856073e-07 |
| C1  | H25 | 1.1560000169e-06 |
| C11 | H25 | 4.8032664443e-07 |
| C12 | H25 | 2.6347803912e-06 |
| N13 | H25 | 3.9909653521e-05 |
| N14 | H25 | 7.1805950325e-05 |
| O15 | H25 | 0.57587579673    |
| H16 | H25 | 0.00035578361656 |
| H17 | H25 | 0.00019414126455 |
| H18 | H25 | 5.2241822052e-05 |
| H19 | H25 | 0.0036250711974  |
| C2  | H25 | 3.8950367861e-07 |
| H21 | H25 | 1.4187157977e-07 |
| H22 | H25 | 9.9191411275e-08 |
| H23 | H25 | 1.1087111334e-07 |
| H24 | H25 | 3.6236260774e-07 |

## O-AMINODIAZOBENZENE

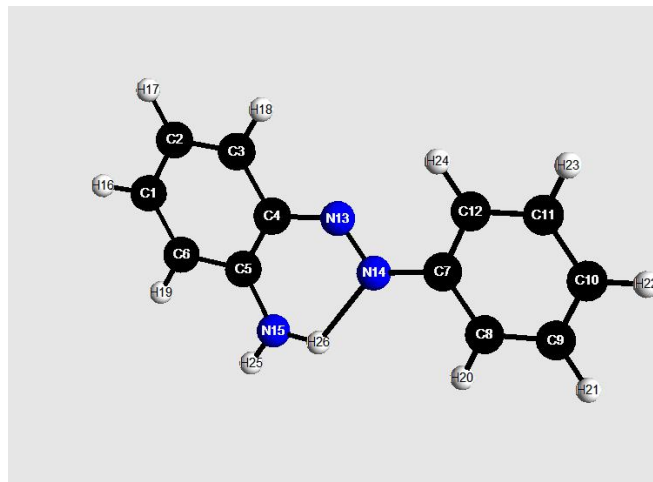

### HARTREE-FOCK

| Atom A | Atom B | Delocalization index |
|--------|--------|----------------------|
| C1     | C2     | 1.336935716          |
| C1     | C3     | 0.081126132384       |
| C2     | C3     | 1.4265554838         |
| C1     | C4     | 0.073749287513       |
| C2     | C4     | 0.067773476262       |
| C3     | C4     | 1.2874224272         |
| C1     | C5     | 0.07194458562        |
| C2     | C5     | 0.07211050715        |
| C3     | C5     | 0.063224949422       |
| C4     | C5     | 1.2253335338         |
| C1     | C6     | 1.4360196767         |
| C2     | C6     | 0.071781120515       |
| C3     | C6     | 0.09000014718        |
| C4     | C6     | 0.062005247329       |
| C5     | C6     | 1.2574926721         |
| C1     | C7     | 0.00071336754799     |
| C2     | C7     | 0.00042983241462     |
| C3     | C7     | 0.0019760141606      |
| C4     | C7     | 0.012676754852       |
| C5     | C7     | 0.001493374273       |
| C6     | C7     | 0.00027521211984     |
| C1     | C8     | 0.0016269318396      |
| C2     | C8     | 0.00045214335102     |
| C3     | C8     | 0.0022797279637      |
| C4     | C8     | 0.0030425706691      |
| C5     | C8     | 0.0022679770326      |
| C6     | C8     | 0.00023537943117     |
| C7     | C8     | 1.3383821313         |
| C1     | C9     | 0.00017693479945     |
| C2     | C9     | 6.5626220947e-05     |



|     |     |                  |
|-----|-----|------------------|
| C3  | C9  | 0.00025695170281 |
| C4  | C9  | 0.0005522531712  |
| C5  | C9  | 0.00024091954643 |
| C6  | C9  | 2.8519559592e-05 |
| C7  | C9  | 0.070844014811   |
| C8  | C9  | 1.3773495044     |
| C1  | C1  | 0.0012476751234  |
| C2  | C1  | 0.00030856489687 |
| C3  | C1  | 0.0014872429071  |
| C4  | C1  | 0.0013307783863  |
| C5  | C1  | 0.0015755935276  |
| C6  | C1  | 0.00016950392055 |
| C7  | C1  | 0.088214201292   |
| C8  | C1  | 0.074187324239   |
| C9  | C1  | 1.4007318663     |
| C1  | C11 | 0.00016985418109 |
| C2  | C11 | 4.9528893193e-05 |
| C3  | C11 | 0.00023528362664 |
| C4  | C11 | 0.00030604464363 |
| C5  | C11 | 0.00025437119518 |
| C6  | C11 | 2.8181525091e-05 |
| C7  | C11 | 0.073900322173   |
| C8  | C11 | 0.093475054696   |
| C9  | C11 | 0.074108127888   |
| C1  | C11 | 1.3651089584     |
| C1  | C12 | 0.0013524511197  |
| C2  | C12 | 0.00035172717782 |
| C3  | C12 | 0.0018554542301  |
| C4  | C12 | 0.0025901639438  |
| C5  | C12 | 0.0021093004601  |
| C6  | C12 | 0.00023532651508 |
| C7  | C12 | 1.3100127089     |
| C8  | C12 | 0.066857586532   |
| C9  | C12 | 0.096164544504   |
| C1  | C12 | 0.072979462117   |
| C11 | C12 | 1.4126257476     |
| C1  | N13 | 0.010104695893   |
| C2  | N13 | 0.011993908893   |
| C3  | N13 | 0.098158937186   |
| C4  | N13 | 0.99910494411    |
| C5  | N13 | 0.073914772973   |
| C6  | N13 | 0.0089369720905  |
| C7  | N13 | 0.068936967697   |
| C8  | N13 | 0.031201928405   |
| C9  | N13 | 0.0038235997785  |
| C1  | N13 | 0.013856111147   |
| C11 | N13 | 0.0049401967194  |
| C12 | N13 | 0.049421929986   |

|     |     |                  |
|-----|-----|------------------|
| C1  | N14 | 0.015594389042   |
| C2  | N14 | 0.0056049583049  |
| C3  | N14 | 0.032518305438   |
| C4  | N14 | 0.073288188591   |
| C5  | N14 | 0.032522961621   |
| C6  | N14 | 0.0029227476317  |
| C7  | N14 | 0.97326674124    |
| C8  | N14 | 0.087504021198   |
| C9  | N14 | 0.0097686136871  |
| C1  | N14 | 0.0087970999937  |
| C11 | N14 | 0.011705002738   |
| C12 | N14 | 0.067295369532   |
| N13 | N14 | 1.9501174757     |
| C1  | N15 | 0.017374181203   |
| C2  | N15 | 0.02447218727    |
| C3  | N15 | 0.012011413464   |
| C4  | N15 | 0.094477178484   |
| C5  | N15 | 1.0251672259     |
| C6  | N15 | 0.11184949588    |
| C7  | N15 | 0.0024708813037  |
| C8  | N15 | 0.0011293601427  |
| C9  | N15 | 0.00012187043957 |
| C1  | N15 | 0.00066408645749 |
| C11 | N15 | 0.00021664161015 |
| C12 | N15 | 0.0012889979649  |
| N13 | N15 | 0.019690783398   |
| N14 | N15 | 0.075998199935   |
| C1  | H16 | 0.97302632005    |
| C2  | H16 | 0.045423593913   |
| C3  | H16 | 0.0086302216725  |
| C4  | H16 | 0.0047284949627  |
| C5  | H16 | 0.0084832716172  |
| C6  | H16 | 0.050995334626   |
| C7  | H16 | 5.3360752085e-05 |
| C8  | H16 | 0.00011446633713 |
| C9  | H16 | 1.2381188442e-05 |
| C1  | H16 | 8.8941914958e-05 |
| C11 | H16 | 1.2250094009e-05 |
| C12 | H16 | 9.4810253312e-05 |
| N13 | H16 | 0.00063326026642 |
| N14 | H16 | 0.0010237554695  |
| N15 | H16 | 0.0015018077774  |
| C1  | H17 | 0.048167859918   |
| C2  | H17 | 0.98185254286    |
| C3  | H17 | 0.052175686097   |
| C4  | H17 | 0.0089955846403  |
| C5  | H17 | 0.004821375496   |
| C6  | H17 | 0.0088903292362  |

|     |     |                  |
|-----|-----|------------------|
| C7  | H17 | 7.5018098437e-05 |
| C8  | H17 | 3.6883449016e-05 |
| C9  | H17 | 6.1774944493e-06 |
| C1  | H17 | 2.0952353465e-05 |
| C11 | H17 | 4.8085893807e-06 |
| C12 | H17 | 2.5325586598e-05 |
| N13 | H17 | 0.0012797234017  |
| N14 | H17 | 0.00052942138221 |
| N15 | H17 | 0.0020656789931  |
| H16 | H17 | 0.0052630473075  |
| C1  | H18 | 0.0086998781458  |
| C2  | H18 | 0.046014793547   |
| C3  | H18 | 0.96063079868    |
| C4  | H18 | 0.042876177326   |
| C5  | H18 | 0.0070892732102  |
| C6  | H18 | 0.0055573081672  |
| C7  | H18 | 0.00028040014373 |
| C8  | H18 | 9.1295847404e-05 |
| C9  | H18 | 1.5589661233e-05 |
| C1  | H18 | 5.4450134867e-05 |
| C11 | H18 | 2.2997085616e-05 |
| C12 | H18 | 0.00016681899316 |
| N13 | H18 | 0.025798381009   |
| N14 | H18 | 0.0025881760026  |
| N15 | H18 | 0.001540442523   |
| H16 | H18 | 0.0014248637496  |
| H17 | H18 | 0.0057075130348  |
| C1  | H19 | 0.050873363963   |
| C2  | H19 | 0.0088656149002  |
| C3  | H19 | 0.0057957224267  |
| C4  | H19 | 0.0069591610549  |
| C5  | H19 | 0.047318444753   |
| C6  | H19 | 0.97367157778    |
| C7  | H19 | 3.9732820822e-05 |
| C8  | H19 | 8.6623067868e-06 |
| C9  | H19 | 1.5418432037e-06 |
| C1  | H19 | 3.5514035958e-06 |
| C11 | H19 | 2.4654753734e-06 |
| C12 | H19 | 2.237855379e-05  |
| N13 | H19 | 0.0019821233784  |
| N14 | H19 | 0.0002746332975  |
| N15 | H19 | 0.016783845275   |
| H16 | H19 | 0.0063197503963  |
| H17 | H19 | 0.0013958256882  |
| H18 | H19 | 0.00034707671721 |
| C1  | C2  | 6.9329283277e-05 |
| C2  | C2  | 3.2728656989e-05 |
| C3  | C2  | 0.00010093721033 |

|     |     |                  |
|-----|-----|------------------|
| C4  | C2  | 0.00026636140249 |
| C5  | C2  | 0.0001296520831  |
| C6  | C2  | 3.6226199562e-05 |
| C7  | C2  | 0.04549082599    |
| C8  | C2  | 0.96767850322    |
| C9  | C2  | 0.046480762267   |
| C1  | C2  | 0.0082513218337  |
| C11 | C2  | 0.005830893926   |
| C12 | C2  | 0.0076250338284  |
| N13 | C2  | 0.0024380739662  |
| N14 | C2  | 0.020879372665   |
| N15 | C2  | 0.00054496273167 |
| H16 | C2  | 5.8620569085e-06 |
| H17 | C2  | 2.5995558117e-06 |
| H18 | C2  | 1.3775023884e-05 |
| H19 | C2  | 2.8142637684e-06 |
| C1  | H21 | 6.4623166463e-06 |
| C2  | H21 | 4.4332504605e-06 |
| C3  | H21 | 1.6589551839e-05 |
| C4  | H21 | 7.642903272e-05  |
| C5  | H21 | 1.0803364334e-05 |
| C6  | H21 | 2.0793376622e-06 |
| C7  | H21 | 0.0083158818     |
| C8  | H21 | 0.049103163776   |
| C9  | H21 | 0.97635390892    |
| C1  | H21 | 0.049328849866   |
| C11 | H21 | 0.0086696103746  |
| C12 | H21 | 0.0060617445187  |
| N13 | H21 | 0.00035014078019 |
| N14 | H21 | 0.0011598588682  |
| N15 | H21 | 5.3269593122e-06 |
| H16 | H21 | 4.7120925312e-07 |
| H17 | H21 | 8.5971555611e-07 |
| H18 | H21 | 2.2355376825e-06 |
| H19 | H21 | 3.9963300172e-07 |
| C2  | H21 | 0.0056086218254  |
| C1  | H22 | 8.9622519682e-05 |
| C2  | H22 | 2.4492651126e-05 |
| C3  | H22 | 0.00010432280678 |
| C4  | H22 | 0.00011346241815 |
| C5  | H22 | 0.00011484002115 |
| C6  | H22 | 1.1656926635e-05 |
| C7  | H22 | 0.0056274044163  |
| C8  | H22 | 0.0086587724346  |
| C9  | H22 | 0.049464136545   |
| C1  | H22 | 0.97666248522    |
| C11 | H22 | 0.048049317981   |
| C12 | H22 | 0.0084155251026  |

|     |     |                  |
|-----|-----|------------------|
| N13 | H22 | 0.00098221884294 |
| N14 | H22 | 0.00059496841321 |
| N15 | H22 | 4.8996939476e-05 |
| H16 | H22 | 6.1200513646e-06 |
| H17 | H22 | 1.6602911387e-06 |
| H18 | H22 | 4.1826837283e-06 |
| H19 | H22 | 3.8795578828e-07 |
| C2  | H22 | 0.0013052882196  |
| H21 | H22 | 0.0056089974033  |
| C1  | H23 | 7.1012481068e-06 |
| C2  | H23 | 2.6275550312e-06 |
| C3  | H23 | 1.1804357832e-05 |
| C4  | H23 | 4.2653107998e-05 |
| C5  | H23 | 1.2589123231e-05 |
| C6  | H23 | 2.0857107188e-06 |
| C7  | H23 | 0.0084665410742  |
| C8  | H23 | 0.0058650876903  |
| C9  | H23 | 0.0085141838916  |
| C1  | H23 | 0.048251579513   |
| C11 | H23 | 0.97550922557    |
| C12 | H23 | 0.050364334428   |
| N13 | H23 | 0.00028373875391 |
| N14 | H23 | 0.0018322721194  |
| N15 | H23 | 4.1504242329e-05 |
| H16 | H23 | 5.2228578259e-07 |
| H17 | H23 | 3.5369182692e-07 |
| H18 | H23 | 2.0847005598e-06 |
| H19 | H23 | 3.9492671113e-07 |
| C2  | H23 | 0.00036939406376 |
| H21 | H23 | 0.0014208841726  |
| H22 | H23 | 0.0054967619633  |
| C1  | H24 | 6.7310173739e-05 |
| C2  | H24 | 3.0839653475e-05 |
| C3  | H24 | 0.00026680175961 |
| C4  | H24 | 0.001189542655   |
| C5  | H24 | 0.00041172037972 |
| C6  | H24 | 6.5448989523e-05 |
| C7  | H24 | 0.041672986322   |
| C8  | H24 | 0.0073098069935  |
| C9  | H24 | 0.00529908523    |
| C1  | H24 | 0.0077365015848  |
| C11 | H24 | 0.045378018043   |
| C12 | H24 | 0.95405252096    |
| N13 | H24 | 0.034584757396   |
| N14 | H24 | 0.0068866461211  |
| N15 | H24 | 0.00010027500484 |
| H16 | H24 | 5.561278909e-06  |
| H17 | H24 | 3.7972191197e-06 |

|     |     |                  |
|-----|-----|------------------|
| H18 | H24 | 0.00027424600118 |
| H19 | H24 | 2.036871574e-05  |
| C2  | H24 | 0.0015292748215  |
| H21 | H24 | 0.00033912852512 |
| H22 | H24 | 0.0011776991442  |
| H23 | H24 | 0.0056823848923  |
| C1  | H25 | 0.00058495844654 |
| C2  | H25 | 0.00076283033231 |
| C3  | H25 | 0.0010248318994  |
| C4  | H25 | 0.0072111611291  |
| C5  | H25 | 0.01830507626    |
| C6  | H25 | 0.0071283012184  |
| C7  | H25 | 0.00018774937595 |
| C8  | H25 | 3.9111470235e-05 |
| C9  | H25 | 3.4495453011e-06 |
| C1  | H25 | 1.8509925365e-05 |
| C11 | H25 | 1.2052044811e-05 |
| C12 | H25 | 7.1218232941e-05 |
| N13 | H25 | 0.00059888128612 |
| N14 | H25 | 0.003253320262   |
| N15 | H25 | 0.82338810714    |
| H16 | H25 | 5.8547869453e-05 |
| H17 | H25 | 8.0854919661e-05 |
| H18 | H25 | 0.00027919850322 |
| H19 | H25 | 0.005640891614   |
| C2  | H25 | 1.1152644624e-05 |
| H21 | H25 | 1.6543904517e-07 |
| H22 | H25 | 1.3445000226e-06 |
| H23 | H25 | 4.4897250906e-06 |
| H24 | H25 | 1.1526424618e-05 |
| C1  | H26 | 0.0010664903902  |
| C2  | H26 | 0.00063815267176 |
| C3  | H26 | 0.00019714697173 |
| C4  | H26 | 0.003045909598   |
| C5  | H26 | 0.014273109795   |
| C6  | H26 | 0.0059024499446  |
| C7  | H26 | 0.0015760247741  |
| C8  | H26 | 0.00056097999546 |
| C9  | H26 | 5.626139405e-05  |
| C1  | H26 | 4.2322442956e-05 |
| C11 | H26 | 8.3818174583e-05 |
| C12 | H26 | 0.00049254578424 |
| N13 | H26 | 0.0034270091766  |
| N14 | H26 | 0.053530541861   |
| N15 | H26 | 0.71024641537    |
| H16 | H26 | 0.00019170916803 |
| H17 | H26 | 5.3183422812e-05 |
| H18 | H26 | 3.8563174095e-05 |

|     |     |                  |
|-----|-----|------------------|
| H19 | H26 | 0.00054847183805 |
| C2  | H26 | 0.0007654126781  |
| H21 | H26 | 5.8128301104e-06 |
| H22 | H26 | 5.7728112989e-06 |
| H23 | H26 | 2.7435986034e-05 |
| H24 | H26 | 4.4335518909e-05 |
| H25 | H26 | 0.012474564701   |

## P-HYDROXYDIAZOBENZENE

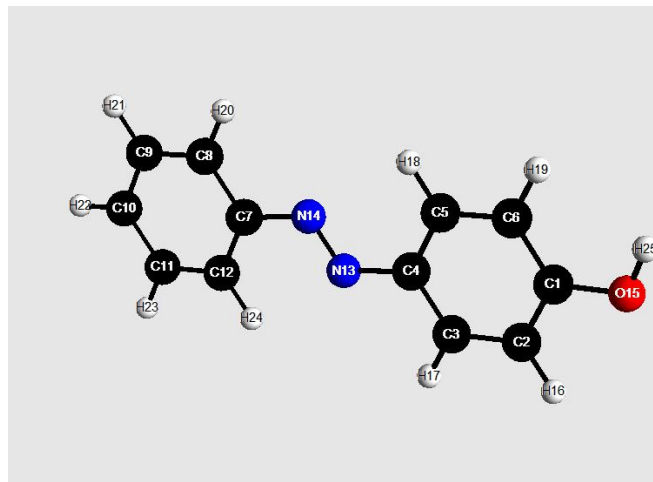

### HARTREE-FOCK

| Atom A | Atom B | Delocalization index |
|--------|--------|----------------------|
| C1     | C2     | 1.3105993824         |
| C1     | C3     | 0.078311286535       |
| C2     | C3     | 1.3938444767         |
| C1     | C4     | 0.07549468505        |
| C2     | C4     | 0.068314686378       |
| C3     | C4     | 1.3219411398         |
| C1     | C5     | 0.073371794874       |
| C2     | C5     | 0.091832488414       |
| C3     | C5     | 0.069093336584       |
| C4     | C5     | 1.3075328601         |
| C1     | C6     | 1.2950000795         |
| C2     | C6     | 0.063137433298       |
| C3     | C6     | 0.088000456094       |
| C4     | C6     | 0.071237247759       |
| C5     | C6     | 1.4136605931         |
| C1     | C7     | 0.00065245775398     |
| C2     | C7     | 0.00041521690863     |
| C3     | C7     | 0.0020995276166      |
| C4     | C7     | 0.01323328745        |
| C5     | C7     | 0.0021296702673      |
| C6     | C7     | 0.00026749904651     |
| C1     | C8     | 0.0014385922771      |
| C2     | C8     | 0.00029918828709     |
| C3     | C8     | 0.002359885168       |
| C4     | C8     | 0.0023932226289      |
| C5     | C8     | 0.0020821381499      |
| C6     | C8     | 0.00033574943773     |
| C7     | C8     | 1.3383292452         |
| C1     | C9     | 0.00015625074087     |
| C2     | C9     | 4.2392395508e-05     |



|     |     |                  |
|-----|-----|------------------|
| C3  | C9  | 0.00026464829249 |
| C4  | C9  | 0.00045120757586 |
| C5  | C9  | 0.00021536820165 |
| C6  | C9  | 4.4623941574e-05 |
| C7  | C9  | 0.07096614615    |
| C8  | C9  | 1.3755279202     |
| C1  | C1  | 0.0010900561294  |
| C2  | C1  | 0.00019319683864 |
| C3  | C1  | 0.001549376012   |
| C4  | C1  | 0.00091675574682 |
| C5  | C1  | 0.0013942431901  |
| C6  | C1  | 0.00022630729439 |
| C7  | C1  | 0.088064622158   |
| C8  | C1  | 0.074461613533   |
| C9  | C1  | 1.4022654254     |
| C1  | C11 | 0.00014797589366 |
| C2  | C11 | 3.6684540573e-05 |
| C3  | C11 | 0.00024321784783 |
| C4  | C11 | 0.00026717692336 |
| C5  | C11 | 0.00026681643414 |
| C6  | C11 | 4.1510431438e-05 |
| C7  | C11 | 0.073591647837   |
| C8  | C11 | 0.093179565326   |
| C9  | C11 | 0.073672140499   |
| C1  | C11 | 1.3633661426     |
| C1  | C12 | 0.0011759443203  |
| C2  | C12 | 0.00023108732212 |
| C3  | C12 | 0.0019079204889  |
| C4  | C12 | 0.0022413050354  |
| C5  | C12 | 0.0020575064322  |
| C6  | C12 | 0.00031254272473 |
| C7  | C12 | 1.3079236205     |
| C8  | C12 | 0.066746265585   |
| C9  | C12 | 0.096154644314   |
| C1  | C12 | 0.073261075007   |
| C11 | C12 | 1.4142863548     |
| C1  | N13 | 0.0089885113054  |
| C2  | N13 | 0.0099293942974  |
| C3  | N13 | 0.090229003503   |
| C4  | N13 | 0.97756204851    |
| C5  | N13 | 0.072056306951   |
| C6  | N13 | 0.012974853384   |
| C7  | N13 | 0.068519208018   |
| C8  | N13 | 0.032774679415   |
| C9  | N13 | 0.0039288969969  |
| C1  | N13 | 0.01479309414    |
| C11 | N13 | 0.0050166462025  |
| C12 | N13 | 0.049661448497   |

|     |     |                  |
|-----|-----|------------------|
| C1  | N14 | 0.013763396415   |
| C2  | N14 | 0.0042895198646  |
| C3  | N14 | 0.032736827304   |
| C4  | N14 | 0.071157057726   |
| C5  | N14 | 0.050959830787   |
| C6  | N14 | 0.0058093977215  |
| C7  | N14 | 0.97237575844    |
| C8  | N14 | 0.08919185611    |
| C9  | N14 | 0.0097619343005  |
| C1  | N14 | 0.0092450063119  |
| C11 | N14 | 0.011944479673   |
| C12 | N14 | 0.068754281922   |
| N13 | N14 | 1.9845517557     |
| C1  | O15 | 0.83262675358    |
| C2  | O15 | 0.11044309839    |
| C3  | O15 | 0.013811335595   |
| C4  | O15 | 0.016965414202   |
| C5  | O15 | 0.014597022427   |
| C6  | O15 | 0.11305610846    |
| C7  | O15 | 0.00017411586581 |
| C8  | O15 | 0.00040958681244 |
| C9  | O15 | 4.572648314e-05  |
| C1  | O15 | 0.00031448630118 |
| C11 | O15 | 4.2479627397e-05 |
| C12 | O15 | 0.00033480038879 |
| N13 | O15 | 0.002448627871   |
| N14 | O15 | 0.0037888970262  |
| C1  | H16 | 0.046821253051   |
| C2  | H16 | 0.96832181042    |
| C3  | H16 | 0.046312474989   |
| C4  | H16 | 0.0080315243731  |
| C5  | H16 | 0.0054880619618  |
| C6  | H16 | 0.0067722443669  |
| C7  | H16 | 7.1843604684e-05 |
| C8  | H16 | 1.8479203421e-05 |
| C9  | H16 | 3.7857263954e-06 |
| C1  | H16 | 7.1566806986e-06 |
| C11 | H16 | 2.6350514566e-06 |
| C12 | H16 | 1.061881354e-05  |
| N13 | H16 | 0.0010976760013  |
| N14 | H16 | 0.00035244656631 |
| O15 | H16 | 0.01526261052    |
| C1  | H17 | 0.0080886734761  |
| C2  | H17 | 0.045728419176   |
| C3  | H17 | 0.96249225596    |
| C4  | H17 | 0.042968307219   |
| C5  | H17 | 0.0076017779167  |
| C6  | H17 | 0.0052972295141  |

|     |     |                  |
|-----|-----|------------------|
| C7  | H17 | 0.0002469981501  |
| C8  | H17 | 9.7371785743e-05 |
| C9  | H17 | 1.4273116299e-05 |
| C1  | H17 | 6.1577757103e-05 |
| C11 | H17 | 1.7333146585e-05 |
| C12 | H17 | 0.00013160109586 |
| N13 | H17 | 0.020743742786   |
| N14 | H17 | 0.0024514832486  |
| O15 | H17 | 0.0013471854677  |
| H16 | H17 | 0.0056017826161  |
| C1  | H18 | 0.007549935323   |
| C2  | H18 | 0.004969944107   |
| C3  | H18 | 0.0073926561894  |
| C4  | H18 | 0.039734469652   |
| C5  | H18 | 0.95153910059    |
| C6  | H18 | 0.045428654451   |
| C7  | H18 | 0.0012415935438  |
| C8  | H18 | 0.00018976907116 |
| C9  | H18 | 1.7815663079e-05 |
| C1  | H18 | 5.7369335478e-05 |
| C11 | H18 | 6.7572395161e-05 |
| C12 | H18 | 0.00036668450464 |
| N13 | H18 | 0.0070287215453  |
| N14 | H18 | 0.032797817526   |
| O15 | H18 | 0.0015065159887  |
| H16 | H18 | 0.00027757853412 |
| H17 | H18 | 0.0015649106518  |
| C1  | H19 | 0.048752628908   |
| C2  | H19 | 0.0069900883568  |
| C3  | H19 | 0.0058310029243  |
| C4  | H19 | 0.0083808442462  |
| C5  | H19 | 0.049423035216   |
| C6  | H19 | 0.97311216871    |
| C7  | H19 | 4.8685805307e-05 |
| C8  | H19 | 1.7210361863e-05 |
| C9  | H19 | 2.7238676972e-06 |
| C1  | H19 | 1.0524819057e-05 |
| C11 | H19 | 2.5772088754e-06 |
| C12 | H19 | 2.6801593643e-05 |
| N13 | H19 | 0.0018850437119  |
| N14 | H19 | 0.0003401669939  |
| O15 | H19 | 0.015899684793   |
| H16 | H19 | 0.001695893791   |
| H17 | H19 | 0.00033046031394 |
| H18 | H19 | 0.0058740801328  |
| C1  | C2  | 5.9255158802e-05 |
| C2  | C2  | 1.6855190659e-05 |
| C3  | C2  | 0.00010054022374 |

|     |     |                  |
|-----|-----|------------------|
| C4  | C2  | 0.00025930542152 |
| C5  | C2  | 0.00013759529178 |
| C6  | C2  | 2.0325402242e-05 |
| C7  | C2  | 0.044828325207   |
| C8  | C2  | 0.96536618468    |
| C9  | C2  | 0.045582255013   |
| C1  | C2  | 0.0081781193147  |
| C11 | C2  | 0.005685686352   |
| C12 | C2  | 0.0075647763779  |
| N13 | C2  | 0.002525287245   |
| N14 | C2  | 0.021487159883   |
| O15 | C2  | 1.6824005303e-05 |
| H16 | C2  | 1.6628617755e-06 |
| H17 | C2  | 1.2700495272e-05 |
| H18 | C2  | 0.00014124779584 |
| H19 | C2  | 2.1659214546e-06 |
| C1  | H21 | 5.8844098389e-06 |
| C2  | H21 | 3.9676002836e-06 |
| C3  | H21 | 1.7566940774e-05 |
| C4  | H21 | 7.5102144637e-05 |
| C5  | H21 | 9.7707243228e-06 |
| C6  | H21 | 2.9550056143e-06 |
| C7  | H21 | 0.0083162749165  |
| C8  | H21 | 0.048890422437   |
| C9  | H21 | 0.97632930296    |
| C1  | H21 | 0.049468764289   |
| C11 | H21 | 0.0086570499905  |
| C12 | H21 | 0.0060386006443  |
| N13 | H21 | 0.0003485493434  |
| N14 | H21 | 0.0011588879304  |
| O15 | H21 | 1.6398517326e-06 |
| H16 | H21 | 8.2834809052e-07 |
| H17 | H21 | 1.6961367148e-06 |
| H18 | H21 | 1.6573659271e-06 |
| H19 | H21 | 3.143712544e-07  |
| C2  | H21 | 0.0055004751997  |
| C1  | H22 | 7.837765108e-05  |
| C2  | H22 | 1.4911599683e-05 |
| C3  | H22 | 0.00010883773947 |
| C4  | H22 | 7.682681064e-05  |
| C5  | H22 | 9.9666869719e-05 |
| C6  | H22 | 1.7651888018e-05 |
| C7  | H22 | 0.0056076527743  |
| C8  | H22 | 0.0086489003141  |
| C9  | H22 | 0.049425220774   |
| C1  | H22 | 0.97637982547    |
| C11 | H22 | 0.047988340535   |
| C12 | H22 | 0.008401099656   |

|     |     |                  |
|-----|-----|------------------|
| N13 | H22 | 0.0010396386427  |
| N14 | H22 | 0.00060437171677 |
| O15 | H22 | 2.3836800484e-05 |
| H16 | H22 | 5.8620061982e-07 |
| H17 | H22 | 4.4196351072e-06 |
| H18 | H22 | 3.9288807741e-06 |
| H19 | H22 | 9.1839183805e-07 |
| C2  | H22 | 0.0012966943318  |
| H21 | H22 | 0.0056201316435  |
| C1  | H23 | 6.5719476864e-06 |
| C2  | H23 | 2.301472086e-06  |
| C3  | H23 | 1.2623716983e-05 |
| C4  | H23 | 4.6762587147e-05 |
| C5  | H23 | 2.4707090444e-05 |
| C6  | H23 | 2.5254305299e-06 |
| C7  | H23 | 0.008473008337   |
| C8  | H23 | 0.0058476998797  |
| C9  | H23 | 0.0084847647985  |
| C1  | H23 | 0.048225745656   |
| C11 | H23 | 0.97551869733    |
| C12 | H23 | 0.050449208838   |
| N13 | H23 | 0.00028302460548 |
| N14 | H23 | 0.001886072468   |
| O15 | H23 | 1.8414044957e-06 |
| H16 | H23 | 2.8909941406e-07 |
| H17 | H23 | 1.9523024056e-06 |
| H18 | H23 | 2.2007310436e-05 |
| H19 | H23 | 5.7230522814e-07 |
| C2  | H23 | 0.00036223693608 |
| H21 | H23 | 0.0014151623309  |
| H22 | H23 | 0.005496133347   |
| C1  | H24 | 5.3266391497e-05 |
| C2  | H24 | 1.8078371171e-05 |
| C3  | H24 | 0.00019350522866 |
| C4  | H24 | 0.0012255551622  |
| C5  | H24 | 0.00037733322406 |
| C6  | H24 | 7.2265504543e-05 |
| C7  | H24 | 0.041440088577   |
| C8  | H24 | 0.0073411501426  |
| C9  | H24 | 0.0053067958035  |
| C1  | H24 | 0.0077636808951  |
| C11 | H24 | 0.045388490378   |
| C12 | H24 | 0.95445652178    |
| N13 | H24 | 0.033599194646   |
| N14 | H24 | 0.0069956927046  |
| O15 | H24 | 1.6450128235e-05 |
| H16 | H24 | 1.7892082158e-06 |
| H17 | H24 | 0.00014610906577 |

|     |     |                  |
|-----|-----|------------------|
| H18 | H24 | 4.1421046714e-05 |
| H19 | H24 | 2.1143029756e-05 |
| C2  | H24 | 0.0015056805986  |
| H21 | H24 | 0.00033998529685 |
| H22 | H24 | 0.0011822589821  |
| H23 | H24 | 0.005666043434   |
| C1  | H25 | 0.010149263267   |
| C2  | H25 | 0.0055493336127  |
| C3  | H25 | 0.00094679941821 |
| C4  | H25 | 0.00023463511676 |
| C5  | H25 | 0.00040208831281 |
| C6  | H25 | 0.0049624553646  |
| C7  | H25 | 3.094198098e-06  |
| C8  | H25 | 3.3217713287e-06 |
| C9  | H25 | 5.0459116691e-07 |
| C1  | H25 | 2.3667079147e-06 |
| C11 | H25 | 3.9061082807e-07 |
| C12 | H25 | 3.0047704426e-06 |
| N13 | H25 | 6.7198084369e-05 |
| N14 | H25 | 3.233859708e-05  |
| O15 | H25 | 0.5749740131     |
| H16 | H25 | 0.00034563463044 |
| H17 | H25 | 0.00018769971145 |
| H18 | H25 | 4.7372315467e-05 |
| H19 | H25 | 0.0039398779756  |
| C2  | H25 | 2.0148933949e-07 |
| H21 | H25 | 3.1101479676e-08 |
| H22 | H25 | 1.8455404264e-07 |
| H23 | H25 | 4.3305498244e-08 |
| H24 | H25 | 6.3625439012e-07 |

## P-AMINODIAZOBENZENE

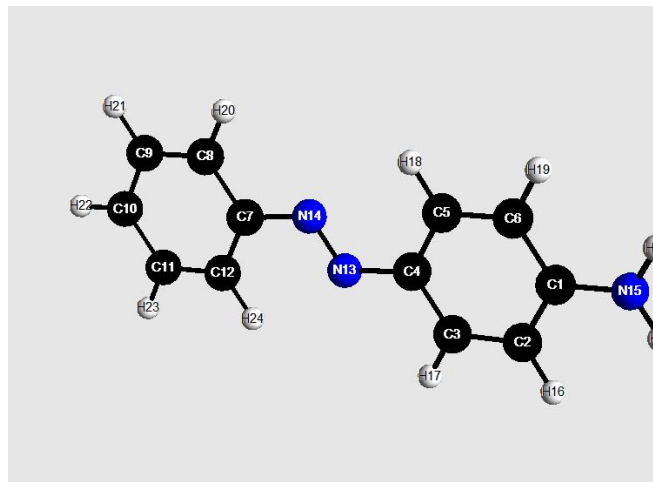

### HARTREE-FOCK

| Atom A | Atom B | Delocalization index |
|--------|--------|----------------------|
| C1     | C2     | 1.3005477235         |
| C1     | C3     | 0.074649149859       |
| C2     | C3     | 1.3967021947         |
| C1     | C4     | 0.070600694298       |
| C2     | C4     | 0.068909374396       |
| C3     | C4     | 1.3223428727         |
| C1     | C5     | 0.073110143744       |
| C2     | C5     | 0.08578863783        |
| C3     | C5     | 0.068929607492       |
| C4     | C5     | 1.2854906638         |
| C1     | C6     | 1.2621025415         |
| C2     | C6     | 0.063052354202       |
| C3     | C6     | 0.083838469083       |
| C4     | C6     | 0.070372519996       |
| C5     | C6     | 1.4418740247         |
| C1     | C7     | 0.00064137382739     |
| C2     | C7     | 0.00046144507109     |
| C3     | C7     | 0.0021328238803      |
| C4     | C7     | 0.013210012029       |
| C5     | C7     | 0.0020698889718      |
| C6     | C7     | 0.00029451511022     |
| C1     | C8     | 0.0014518247674      |
| C2     | C8     | 0.00040481930944     |
| C3     | C8     | 0.0024818934174      |
| C4     | C8     | 0.0026231189087      |
| C5     | C8     | 0.0019871175554      |
| C6     | C8     | 0.00039705362713     |
| C7     | C8     | 1.3381228852         |
| C1     | C9     | 0.00016039410094     |
| C2     | C9     | 5.7489653545e-05     |

|     |     |                  |
|-----|-----|------------------|
| C3  | C9  | 0.00028010785606 |
| C4  | C9  | 0.0004918722756  |
| C5  | C9  | 0.00020727728417 |
| C6  | C9  | 5.5644473011e-05 |
| C7  | C9  | 0.071003735094   |
| C8  | C9  | 1.376438169      |
| C1  | C1  | 0.0011087244339  |
| C2  | C1  | 0.00027625365659 |
| C3  | C1  | 0.0016390776685  |
| C4  | C1  | 0.0010886806546  |
| C5  | C1  | 0.0013276925028  |
| C6  | C1  | 0.00027379863386 |
| C7  | C1  | 0.088190524146   |
| C8  | C1  | 0.074144219055   |
| C9  | C1  | 1.4017312383     |
| C1  | C11 | 0.00015132134478 |
| C2  | C11 | 4.8847478084e-05 |
| C3  | C11 | 0.00025611210202 |
| C4  | C11 | 0.0002945568693  |
| C5  | C11 | 0.00025884633484 |
| C6  | C11 | 4.8473037603e-05 |
| C7  | C11 | 0.073543562884   |
| C8  | C11 | 0.093287518765   |
| C9  | C11 | 0.073857836198   |
| C1  | C11 | 1.3643152249     |
| C1  | C12 | 0.0011952512387  |
| C2  | C12 | 0.00032526757758 |
| C3  | C12 | 0.002019685777   |
| C4  | C12 | 0.0024126296694  |
| C5  | C12 | 0.0019890184391  |
| C6  | C12 | 0.00035937715474 |
| C7  | C12 | 1.3087274442     |
| C8  | C12 | 0.067017359885   |
| C9  | C12 | 0.09615686834    |
| C1  | C12 | 0.072970040402   |
| C11 | C12 | 1.4138041237     |
| C1  | N13 | 0.0092492019782  |
| C2  | N13 | 0.010679725034   |
| C3  | N13 | 0.093052568849   |
| C4  | N13 | 0.98203377241    |
| C5  | N13 | 0.072802678397   |
| C6  | N13 | 0.013921210879   |
| C7  | N13 | 0.068703454186   |
| C8  | N13 | 0.032218530544   |
| C9  | N13 | 0.0038938992262  |
| C1  | N13 | 0.014426959092   |
| C11 | N13 | 0.004972335736   |
| C12 | N13 | 0.049409235903   |



|     |     |                  |
|-----|-----|------------------|
| C1  | N14 | 0.013927512493   |
| C2  | N14 | 0.0052904524275  |
| C3  | N14 | 0.034313057092   |
| C4  | N14 | 0.072968329512   |
| C5  | N14 | 0.049688366633   |
| C6  | N14 | 0.0064368513308  |
| C7  | N14 | 0.97716423677    |
| C8  | N14 | 0.088094694282   |
| C9  | N14 | 0.0097235396728  |
| C1  | N14 | 0.0088760778608  |
| C11 | N14 | 0.011868066114   |
| C12 | N14 | 0.068114147304   |
| N13 | N14 | 1.976061283      |
| C1  | N15 | 0.98507111933    |
| C2  | N15 | 0.11083688273    |
| C3  | N15 | 0.015648612735   |
| C4  | N15 | 0.021323600316   |
| C5  | N15 | 0.015241414401   |
| C6  | N15 | 0.10546139363    |
| C7  | N15 | 0.00025794755506 |
| C8  | N15 | 0.00063256060657 |
| C9  | N15 | 7.458080728e-05  |
| C1  | N15 | 0.00049580164723 |
| C11 | N15 | 6.7602909323e-05 |
| C12 | N15 | 0.00052160860131 |
| N13 | N15 | 0.0038333300073  |
| N14 | N15 | 0.0057087485064  |
| C1  | H16 | 0.048674914495   |
| C2  | H16 | 0.97624778446    |
| C3  | H16 | 0.049654352346   |
| C4  | H16 | 0.0084152507945  |
| C5  | H16 | 0.0056044555289  |
| C6  | H16 | 0.007343894192   |
| C7  | H16 | 7.5525826822e-05 |
| C8  | H16 | 2.5635051486e-05 |
| C9  | H16 | 4.7739208755e-06 |
| C1  | H16 | 1.2365895727e-05 |
| C11 | H16 | 3.3988636961e-06 |
| C12 | H16 | 1.6665201182e-05 |
| N13 | H16 | 0.0011816583377  |
| N14 | H16 | 0.00042744586869 |
| N15 | H16 | 0.01444017998    |
| C1  | H17 | 0.0080719645299  |
| C2  | H17 | 0.046245379414   |
| C3  | H17 | 0.96307375286    |
| C4  | H17 | 0.043098009976   |
| C5  | H17 | 0.007743894345   |
| C6  | H17 | 0.0052201381824  |

|     |     |                  |
|-----|-----|------------------|
| C7  | H17 | 0.00025087516711 |
| C8  | H17 | 0.00010325122221 |
| C9  | H17 | 1.5029865055e-05 |
| C1  | H17 | 6.6744078664e-05 |
| C11 | H17 | 1.8445076851e-05 |
| C12 | H17 | 0.00013949790905 |
| N13 | H17 | 0.020871281599   |
| N14 | H17 | 0.002526202828   |
| N15 | H17 | 0.0013819890648  |
| H16 | H17 | 0.0059319038055  |
| C1  | H18 | 0.0077374103922  |
| C2  | H18 | 0.0046531959974  |
| C3  | H18 | 0.007412489751   |
| C4  | H18 | 0.039087895964   |
| C5  | H18 | 0.95233452893    |
| C6  | H18 | 0.046619035855   |
| C7  | H18 | 0.0012455540552  |
| C8  | H18 | 0.0001789962619  |
| C9  | H18 | 1.6721276655e-05 |
| C1  | H18 | 5.1552587577e-05 |
| C11 | H18 | 6.6256679287e-05 |
| C12 | H18 | 0.00036093505642 |
| N13 | H18 | 0.00694133621    |
| N14 | H18 | 0.032468916809   |
| N15 | H18 | 0.0013012355191  |
| H16 | H18 | 0.00029471721026 |
| H17 | H18 | 0.0015675357395  |
| C1  | H19 | 0.047022594594   |
| C2  | H19 | 0.0071202459617  |
| C3  | H19 | 0.0054701051272  |
| C4  | H19 | 0.0084904369423  |
| C5  | H19 | 0.051324591501   |
| C6  | H19 | 0.97448391385    |
| C7  | H19 | 4.9085086682e-05 |
| C8  | H19 | 2.0089817927e-05 |
| C9  | H19 | 3.2113663216e-06 |
| C1  | H19 | 1.2757233635e-05 |
| C11 | H19 | 2.9669143747e-06 |
| C12 | H19 | 2.9183976647e-05 |
| N13 | H19 | 0.0019322913782  |
| N14 | H19 | 0.00037260161328 |
| N15 | H19 | 0.014482865128   |
| H16 | H19 | 0.0017462321121  |
| H17 | H19 | 0.00032662173678 |
| H18 | H19 | 0.0060822393326  |
| C1  | C2  | 6.0501959707e-05 |
| C2  | C2  | 2.2082276102e-05 |
| C3  | C2  | 0.00010653783129 |

|     |     |                  |
|-----|-----|------------------|
| C4  | C2  | 0.00026771567109 |
| C5  | C2  | 0.00013295869744 |
| C6  | C2  | 2.3527964134e-05 |
| C7  | C2  | 0.044887989204   |
| C8  | C2  | 0.96569481935    |
| C9  | C2  | 0.045804842097   |
| C1  | C2  | 0.008197572039   |
| C11 | C2  | 0.0057016465989  |
| C12 | C2  | 0.0075651374868  |
| N13 | C2  | 0.0025333954084  |
| N14 | C2  | 0.021583164104   |
| N15 | C2  | 2.6754240688e-05 |
| H16 | C2  | 1.9751933322e-06 |
| H17 | C2  | 1.3127866294e-05 |
| H18 | C2  | 0.00013648452502 |
| H19 | C2  | 2.3255799858e-06 |
| C1  | H21 | 5.7888139611e-06 |
| C2  | H21 | 4.422480127e-06  |
| C3  | H21 | 1.7949949426e-05 |
| C4  | H21 | 7.5098495451e-05 |
| C5  | H21 | 9.287560621e-06  |
| C6  | H21 | 3.2785922751e-06 |
| C7  | H21 | 0.0083326706759  |
| C8  | H21 | 0.049027777975   |
| C9  | H21 | 0.97673899428    |
| C1  | H21 | 0.049605087282   |
| C11 | H21 | 0.0086961761488  |
| C12 | H21 | 0.0060861475617  |
| N13 | H21 | 0.000348802941   |
| N14 | H21 | 0.0011550429762  |
| N15 | H21 | 2.5560830244e-06 |
| H16 | H21 | 8.7788938454e-07 |
| H17 | H21 | 1.7499499549e-06 |
| H18 | H21 | 1.5676012651e-06 |
| H19 | H21 | 3.2854109653e-07 |
| C2  | H21 | 0.0055317724231  |
| C1  | H22 | 8.1632509886e-05 |
| C2  | H22 | 2.2478656638e-05 |
| C3  | H22 | 0.00011728035699 |
| C4  | H22 | 9.4705964813e-05 |
| C5  | H22 | 9.6869774571e-05 |
| C6  | H22 | 2.2274007886e-05 |
| C7  | H22 | 0.0056720083314  |
| C8  | H22 | 0.0086786528116  |
| C9  | H22 | 0.049625813147   |
| C1  | H22 | 0.97708258345    |
| C11 | H22 | 0.048232185877   |
| C12 | H22 | 0.0084381507289  |

|     |     |                  |
|-----|-----|------------------|
| N13 | H22 | 0.0010291701669  |
| N14 | H22 | 0.00059740781626 |
| N15 | H22 | 3.8630412514e-05 |
| H16 | H22 | 1.0390580237e-06 |
| H17 | H22 | 4.8717934065e-06 |
| H18 | H22 | 3.6082526273e-06 |
| H19 | H22 | 1.1314552427e-06 |
| C2  | H22 | 0.0013026742987  |
| H21 | H22 | 0.0056391474659  |
| C1  | H23 | 6.6130983869e-06 |
| C2  | H23 | 2.6476015164e-06 |
| C3  | H23 | 1.2797310291e-05 |
| C4  | H23 | 4.6933192065e-05 |
| C5  | H23 | 2.4226531933e-05 |
| C6  | H23 | 2.7257300403e-06 |
| C7  | H23 | 0.0084859365712  |
| C8  | H23 | 0.0059059647888  |
| C9  | H23 | 0.0085330527313  |
| C1  | H23 | 0.048438767313   |
| C11 | H23 | 0.9760170541     |
| C12 | H23 | 0.050578311544   |
| N13 | H23 | 0.00028267169032 |
| N14 | H23 | 0.0018910145092  |
| N15 | H23 | 2.6108699901e-06 |
| H16 | H23 | 3.0302472563e-07 |
| H17 | H23 | 1.9657248529e-06 |
| H18 | H23 | 2.1971787045e-05 |
| H19 | H23 | 5.7924153854e-07 |
| C2  | H23 | 0.00036633302658 |
| H21 | H23 | 0.0014276361542  |
| H22 | H23 | 0.0055217537585  |
| C1  | H24 | 5.8045464922e-05 |
| C2  | H24 | 2.2807776056e-05 |
| C3  | H24 | 0.00020637075919 |
| C4  | H24 | 0.0012247464441  |
| C5  | H24 | 0.0003874291011  |
| C6  | H24 | 7.9178262189e-05 |
| C7  | H24 | 0.041527690142   |
| C8  | H24 | 0.0073373598922  |
| C9  | H24 | 0.0053339086398  |
| C1  | H24 | 0.0077765704708  |
| C11 | H24 | 0.045594569428   |
| C12 | H24 | 0.95490807158    |
| N13 | H24 | 0.033908737013   |
| N14 | H24 | 0.0069997002674  |
| N15 | H24 | 2.8346231034e-05 |
| H16 | H24 | 2.1317207074e-06 |
| H17 | H24 | 0.00015127642066 |

|     |     |                  |
|-----|-----|------------------|
| H18 | H24 | 4.1191764199e-05 |
| H19 | H24 | 2.2010390104e-05 |
| C2  | H24 | 0.0015104975439  |
| H21 | H24 | 0.00034398892705 |
| H22 | H24 | 0.001188381317   |
| H23 | H24 | 0.0056943575789  |
| C1  | H25 | 0.017596443726   |
| C2  | H25 | 0.0075001093357  |
| C3  | H25 | 0.001328002778   |
| C4  | H25 | 0.00067724036518 |
| C5  | H25 | 0.00047882375052 |
| C6  | H25 | 0.0057483370343  |
| C7  | H25 | 8.1472649362e-06 |
| C8  | H25 | 1.7500883717e-05 |
| C9  | H25 | 2.1773155092e-06 |
| C1  | H25 | 1.3390835211e-05 |
| C11 | H25 | 1.8889060734e-06 |
| C12 | H25 | 1.4510514258e-05 |
| N13 | H25 | 0.00013750629601 |
| N14 | H25 | 0.00015212689218 |
| N15 | H25 | 0.81915596794    |
| H16 | H25 | 0.00054283220665 |
| H17 | H25 | 0.00023715930958 |
| H18 | H25 | 4.0511745152e-05 |
| H19 | H25 | 0.00433122934    |
| C2  | H25 | 7.6106079956e-07 |
| H21 | H25 | 7.8970225186e-08 |
| H22 | H25 | 1.0245557885e-06 |
| H23 | H25 | 8.5768733353e-08 |
| H24 | H25 | 1.183781471e-06  |
| C1  | H26 | 0.017557894027   |
| C2  | H26 | 0.0057121033477  |
| C3  | H26 | 0.00047832219169 |
| C4  | H26 | 0.00065662596759 |
| C5  | H26 | 0.0013226615086  |
| C6  | H26 | 0.007408443249   |
| C7  | H26 | 8.2549396058e-06 |
| C8  | H26 | 1.7498562769e-05 |
| C9  | H26 | 2.0591828763e-06 |
| C1  | H26 | 1.3351590304e-05 |
| C11 | H26 | 1.9928465243e-06 |
| C12 | H26 | 1.4671208419e-05 |
| N13 | H26 | 0.00011669627763 |
| N14 | H26 | 0.00016353308305 |
| N15 | H26 | 0.81943372797    |
| H16 | H26 | 0.0041196485823  |
| H17 | H26 | 3.7879097442e-05 |
| H18 | H26 | 0.00022554676097 |

|     |     |                  |
|-----|-----|------------------|
| H19 | H26 | 0.00054786701467 |
| C2  | H26 | 7.8268592428e-07 |
| H21 | H26 | 9.0673753751e-08 |
| H22 | H26 | 1.0202026663e-06 |
| H23 | H26 | 9.5496756873e-08 |
| H24 | H26 | 7.8152835685e-07 |
| H25 | H26 | 0.016221369929   |

## M-AMINODIAZOBENZENE

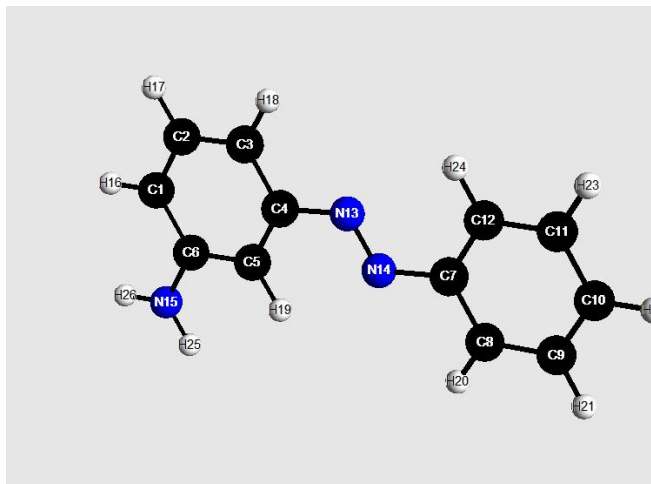

### HARTREE-FOCK

| Atom A | Atom B | Delocalization index |
|--------|--------|----------------------|
| C1     | C2     | 1.4217594863         |
| C1     | C3     | 0.071399649253       |
| C2     | C3     | 1.3628992727         |
| C1     | C4     | 0.083242011761       |
| C2     | C4     | 0.074930903067       |
| C3     | C4     | 1.3364299873         |
| C1     | C5     | 0.06553718892        |
| C2     | C5     | 0.090517061087       |
| C3     | C5     | 0.067467626247       |
| C4     | C5     | 1.3212508696         |
| C1     | C6     | 1.2718375544         |
| C2     | C6     | 0.072121026568       |
| C3     | C6     | 0.077692961192       |
| C4     | C6     | 0.072581327832       |
| C5     | C6     | 1.3227821886         |
| C1     | C7     | 0.00071617982265     |
| C2     | C7     | 0.00042982631098     |
| C3     | C7     | 0.0021156646119      |
| C4     | C7     | 0.013394469018       |
| C5     | C7     | 0.0020883335235      |
| C6     | C7     | 0.00023757815575     |
| C1     | C8     | 0.0015671465192      |
| C2     | C8     | 0.00027472864425     |
| C3     | C8     | 0.0024826690958      |
| C4     | C8     | 0.002053526419       |
| C5     | C8     | 0.0018524844625      |
| C6     | C8     | 0.00022156497067     |
| C7     | C8     | 1.3387326754         |
| C1     | C9     | 0.00016976475766     |
| C2     | C9     | 3.714453811e-05      |

|     |     |                  |
|-----|-----|------------------|
| C3  | C9  | 0.000277330893   |
| C4  | C9  | 0.00040930717133 |
| C5  | C9  | 0.00019301214155 |
| C6  | C9  | 3.1260067963e-05 |
| C7  | C9  | 0.070922586108   |
| C8  | C9  | 1.3752151232     |
| C1  | C1  | 0.0011905018052  |
| C2  | C1  | 0.00017501371886 |
| C3  | C1  | 0.0016459483832  |
| C4  | C1  | 0.00068751970534 |
| C5  | C1  | 0.0012283962037  |
| C6  | C1  | 0.00014487141072 |
| C7  | C1  | 0.088007762307   |
| C8  | C1  | 0.074699660896   |
| C9  | C1  | 1.4025916398     |
| C1  | C11 | 0.00016182469229 |
| C2  | C11 | 3.5481806384e-05 |
| C3  | C11 | 0.00025639477395 |
| C4  | C11 | 0.00023328453685 |
| C5  | C11 | 0.00024276176541 |
| C6  | C11 | 3.0171351221e-05 |
| C7  | C11 | 0.07365907487    |
| C8  | C11 | 0.093133839461   |
| C9  | C11 | 0.073522599906   |
| C1  | C11 | 1.3629271609     |
| C1  | C12 | 0.0012796999883  |
| C2  | C12 | 0.00020303289978 |
| C3  | C12 | 0.0020023389576  |
| C4  | C12 | 0.0020098566365  |
| C5  | C12 | 0.0018891057341  |
| C6  | C12 | 0.00023644095707 |
| C7  | C12 | 1.3073318319     |
| C8  | C12 | 0.066744190643   |
| C9  | C12 | 0.09618109875    |
| C1  | C12 | 0.073501061263   |
| C11 | C12 | 1.4148226288     |
| C1  | N13 | 0.010009943884   |
| C2  | N13 | 0.010176764768   |
| C3  | N13 | 0.091626705511   |
| C4  | N13 | 0.96323018224    |
| C5  | N13 | 0.069491857831   |
| C6  | N13 | 0.011619859203   |
| C7  | N13 | 0.068901120651   |
| C8  | N13 | 0.033219308264   |
| C9  | N13 | 0.0039680892038  |
| C1  | N13 | 0.015080027013   |
| C11 | N13 | 0.0050411869021  |
| C12 | N13 | 0.050231950378   |



|     |     |                  |
|-----|-----|------------------|
| C1  | N14 | 0.014892051615   |
| C2  | N14 | 0.0040614918709  |
| C3  | N14 | 0.034061241782   |
| C4  | N14 | 0.066948461964   |
| C5  | N14 | 0.049836608758   |
| C6  | N14 | 0.0049587066948  |
| C7  | N14 | 0.97175796924    |
| C8  | N14 | 0.089932051541   |
| C9  | N14 | 0.0097837424029  |
| C1  | N14 | 0.0095504048989  |
| C11 | N14 | 0.01196007809    |
| C12 | N14 | 0.068986207402   |
| N13 | N14 | 1.991824751      |
| C1  | N15 | 0.10522172435    |
| C2  | N15 | 0.014538827741   |
| C3  | N15 | 0.023341380468   |
| C4  | N15 | 0.014697953616   |
| C5  | N15 | 0.11292538331    |
| C6  | N15 | 0.97934009286    |
| C7  | N15 | 6.2569501675e-05 |
| C8  | N15 | 3.6799765389e-05 |
| C9  | N15 | 7.6584924627e-06 |
| C1  | N15 | 2.4623474203e-05 |
| C11 | N15 | 4.8434354425e-06 |
| C12 | N15 | 4.3315563336e-05 |
| N13 | N15 | 0.0026646000811  |
| N14 | N15 | 0.00082083192782 |
| C1  | H16 | 0.975280732      |
| C2  | H16 | 0.050248997772   |
| C3  | H16 | 0.0086578895739  |
| C4  | H16 | 0.0054781470417  |
| C5  | H16 | 0.007154915653   |
| C6  | H16 | 0.046786381036   |
| C7  | H16 | 5.9635652235e-05 |
| C8  | H16 | 0.00011011741445 |
| C9  | H16 | 1.204136314e-05  |
| C1  | H16 | 8.5875106621e-05 |
| C11 | H16 | 1.2213168327e-05 |
| C12 | H16 | 9.1811355097e-05 |
| N13 | H16 | 0.00061702463679 |
| N14 | H16 | 0.0010874756079  |
| N15 | H16 | 0.014432719239   |
| C1  | H17 | 0.050582375987   |
| C2  | H17 | 0.97451815232    |
| C3  | H17 | 0.047571796865   |
| C4  | H17 | 0.0084972109638  |
| C5  | H17 | 0.0058279001496  |
| C6  | H17 | 0.008479485276   |

|     |     |                  |
|-----|-----|------------------|
| C7  | H17 | 8.0920299888e-05 |
| C8  | H17 | 1.7759240898e-05 |
| C9  | H17 | 3.9204668836e-06 |
| C1  | H17 | 6.265590188e-06  |
| C11 | H17 | 2.6954906586e-06 |
| C12 | H17 | 8.807263376e-06  |
| N13 | H17 | 0.0012305586562  |
| N14 | H17 | 0.00035516537635 |
| N15 | H17 | 0.0014678275586  |
| H16 | H17 | 0.0061163171356  |
| C1  | H18 | 0.0084576364728  |
| C2  | H18 | 0.046214500576   |
| C3  | H18 | 0.9702037972     |
| C4  | H18 | 0.046026645028   |
| C5  | H18 | 0.0081568289691  |
| C6  | H18 | 0.0050997812571  |
| C7  | H18 | 0.00024830601148 |
| C8  | H18 | 0.000108127359   |
| C9  | H18 | 1.5436403648e-05 |
| C1  | H18 | 6.9373135915e-05 |
| C11 | H18 | 1.8814545548e-05 |
| C12 | H18 | 0.00014109528627 |
| N13 | H18 | 0.021157548781   |
| N14 | H18 | 0.002551107511   |
| N15 | H18 | 0.0019511698043  |
| H16 | H18 | 0.0012570923237  |
| H17 | H18 | 0.0054049551362  |
| C1  | H19 | 0.0067879071139  |
| C2  | H19 | 0.0052136363786  |
| C3  | H19 | 0.0076336466272  |
| C4  | H19 | 0.042032506398   |
| C5  | H19 | 0.95356326273    |
| C6  | H19 | 0.044628117999   |
| C7  | H19 | 0.0013036271958  |
| C8  | H19 | 0.00019901675254 |
| C9  | H19 | 1.8276931725e-05 |
| C1  | H19 | 5.4313380989e-05 |
| C11 | H19 | 6.9743034156e-05 |
| C12 | H19 | 0.00038052239896 |
| N13 | H19 | 0.0074842733522  |
| N14 | H19 | 0.035317553849   |
| N15 | H19 | 0.014061173956   |
| H16 | H19 | 0.0015154510781  |
| H17 | H19 | 0.00031732420859 |
| H18 | H19 | 0.0014961238726  |
| C1  | C2  | 6.3544819879e-05 |
| C2  | C2  | 1.4966896256e-05 |
| C3  | C2  | 0.00010522932875 |

|     |     |                  |
|-----|-----|------------------|
| C4  | C2  | 0.00024969550911 |
| C5  | C2  | 0.00013867426815 |
| C6  | C2  | 1.8496576798e-05 |
| C7  | C2  | 0.044850129613   |
| C8  | C2  | 0.96537405607    |
| C9  | C2  | 0.045483059782   |
| C1  | C2  | 0.0081731902928  |
| C11 | C2  | 0.0056787746888  |
| C12 | C2  | 0.0075740856276  |
| N13 | C2  | 0.0025393093194  |
| N14 | C2  | 0.021433692949   |
| N15 | C2  | 6.548260103e-06  |
| H16 | C2  | 4.6806749523e-06 |
| H17 | C2  | 1.8647631871e-06 |
| H18 | C2  | 1.3039843663e-05 |
| H19 | C2  | 0.00015991167222 |
| C1  | H21 | 6.2345086542e-06 |
| C2  | H21 | 4.0116561331e-06 |
| C3  | H21 | 1.7874520491e-05 |
| C4  | H21 | 7.6297649329e-05 |
| C5  | H21 | 8.89977851e-06   |
| C6  | H21 | 2.4297979138e-06 |
| C7  | H21 | 0.0083134814476  |
| C8  | H21 | 0.048914444734   |
| C9  | H21 | 0.97632058483    |
| C1  | H21 | 0.049475263128   |
| C11 | H21 | 0.0086485285843  |
| C12 | H21 | 0.0060321768451  |
| N13 | H21 | 0.00035100377275 |
| N14 | H21 | 0.0011622050218  |
| N15 | H21 | 6.9511200575e-07 |
| H16 | H21 | 4.7568780373e-07 |
| H17 | H21 | 9.536035159e-07  |
| H18 | H21 | 1.7609332498e-06 |
| H19 | H21 | 1.7778374361e-06 |
| C2  | H21 | 0.0054853283128  |
| C1  | H22 | 8.505650973e-05  |
| C2  | H22 | 1.2042997982e-05 |
| C3  | H22 | 0.00011655578219 |
| C4  | H22 | 5.4417915722e-05 |
| C5  | H22 | 8.6366777798e-05 |
| C6  | H22 | 1.0522085718e-05 |
| C7  | H22 | 0.0055904945358  |
| C8  | H22 | 0.0086449469202  |
| C9  | H22 | 0.049389070421   |
| C1  | H22 | 0.97623586309    |
| C11 | H22 | 0.04788148584    |
| C12 | H22 | 0.0083888798224  |

|     |     |                  |
|-----|-----|------------------|
| N13 | H22 | 0.0010549909237  |
| N14 | H22 | 0.0006137356747  |
| N15 | H22 | 1.8799127584e-06 |
| H16 | H22 | 5.8568781559e-06 |
| H17 | H22 | 4.4918527433e-07 |
| H18 | H22 | 5.0285014733e-06 |
| H19 | H22 | 3.7701214415e-06 |
| C2  | H22 | 0.0012962325297  |
| H21 | H22 | 0.0056201634383  |
| C1  | H23 | 6.967304706e-06  |
| C2  | H23 | 2.4353338058e-06 |
| C3  | H23 | 1.2604596688e-05 |
| C4  | H23 | 4.670894635e-05  |
| C5  | H23 | 2.4245517321e-05 |
| C6  | H23 | 2.1560141798e-06 |
| C7  | H23 | 0.008472008932   |
| C8  | H23 | 0.0058276463925  |
| C9  | H23 | 0.0084709976244  |
| C1  | H23 | 0.048233347482   |
| C11 | H23 | 0.97552267758    |
| C12 | H23 | 0.050435849323   |
| N13 | H23 | 0.00028318205259 |
| N14 | H23 | 0.0018870263606  |
| N15 | H23 | 6.9223688782e-07 |
| H16 | H23 | 6.9416540156e-07 |
| H17 | H23 | 3.3739472116e-07 |
| H18 | H23 | 1.9076312974e-06 |
| H19 | H23 | 2.2786822967e-05 |
| C2  | H23 | 0.00036108078907 |
| H21 | H23 | 0.0014113366905  |
| H22 | H23 | 0.005491085113   |
| C1  | H24 | 6.0835961759e-05 |
| C2  | H24 | 1.9617327674e-05 |
| C3  | H24 | 0.00021234276929 |
| C4  | H24 | 0.0012430018844  |
| C5  | H24 | 0.00036080076687 |
| C6  | H24 | 6.6967599864e-05 |
| C7  | H24 | 0.041225819507   |
| C8  | H24 | 0.0073253451504  |
| C9  | H24 | 0.0052567905421  |
| C1  | H24 | 0.0077398967254  |
| C11 | H24 | 0.045145844157   |
| C12 | H24 | 0.95362993469    |
| N13 | H24 | 0.033596316025   |
| N14 | H24 | 0.0069767500384  |
| N15 | H24 | 2.3783756466e-05 |
| H16 | H24 | 3.93006441e-06   |
| H17 | H24 | 1.7903283517e-06 |

|     |     |                  |
|-----|-----|------------------|
| H18 | H24 | 0.00015291501308 |
| H19 | H24 | 4.4356521958e-05 |
| C2  | H24 | 0.0014971219062  |
| H21 | H24 | 0.00033655686521 |
| H22 | H24 | 0.001178018874   |
| H23 | H24 | 0.0056346305756  |
| C1  | H25 | 0.0073835644238  |
| C2  | H25 | 0.0012876737101  |
| C3  | H25 | 0.00071204875731 |
| C4  | H25 | 0.00047887983477 |
| C5  | H25 | 0.0058971449507  |
| C6  | H25 | 0.01762451601    |
| C7  | H25 | 3.2668374301e-06 |
| C8  | H25 | 2.3788215544e-06 |
| C9  | H25 | 3.9944299604e-07 |
| C1  | H25 | 1.4249730074e-06 |
| C11 | H25 | 4.4315768329e-07 |
| C12 | H25 | 2.7426532702e-06 |
| N13 | H25 | 5.3868872035e-05 |
| N14 | H25 | 7.034759783e-05  |
| N15 | H25 | 0.82120425962    |
| H16 | H25 | 0.0005559799268  |
| H17 | H25 | 0.00024584703115 |
| H18 | H25 | 8.3234553525e-05 |
| H19 | H25 | 0.003960158007   |
| C2  | H25 | 2.9494984819e-07 |
| H21 | H25 | 4.1826954088e-08 |
| H22 | H25 | 1.0877551594e-07 |
| H23 | H25 | 7.8715729503e-08 |
| H24 | H25 | 4.3311977496e-07 |
| C1  | H26 | 0.0057094473333  |
| C2  | H26 | 0.0004842024428  |
| C3  | H26 | 0.00073018578885 |
| C4  | H26 | 0.0012726259098  |
| C5  | H26 | 0.0075358809445  |
| C6  | H26 | 0.017722564134   |
| C7  | H26 | 7.6762924654e-06 |
| C8  | H26 | 1.8800915945e-06 |
| C9  | H26 | 6.6271727156e-07 |
| C1  | H26 | 1.1639198059e-06 |
| C11 | H26 | 4.3062986068e-07 |
| C12 | H26 | 3.9077109615e-06 |
| N13 | H26 | 0.00033399024568 |
| N14 | H26 | 4.1640532551e-05 |
| N15 | H26 | 0.82312913397    |
| H16 | H26 | 0.0043056344317  |
| H17 | H26 | 3.671122264e-05  |
| H18 | H26 | 7.7837941335e-05 |

|     |     |                  |
|-----|-----|------------------|
| H19 | H26 | 0.0005519468658  |
| C2  | H26 | 4.816273879e-07  |
| H21 | H26 | 9.0094066842e-08 |
| H22 | H26 | 9.5645107442e-08 |
| H23 | H26 | 6.8268109956e-08 |
| H24 | H26 | 3.5182297682e-06 |
| H25 | H26 | 0.016375996081   |

# ETHERS

## ETHYL METHYL ETHER

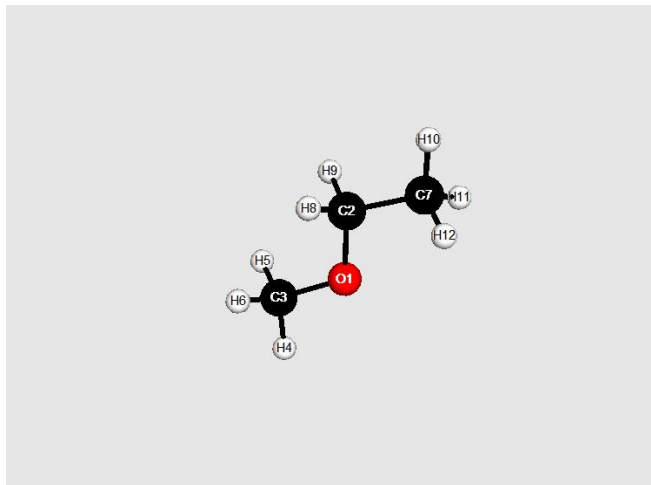

### HARTREE-FOCK

| Atom A | Atom B | Delocalization index |
|--------|--------|----------------------|
| O1     | C2     | 0.78622749895        |
| O1     | C3     | 0.80892638213        |
| C2     | C3     | 0.024873231326       |
| O1     | H4     | 0.071669702195       |
| C2     | H4     | 0.0079200767485      |
| C3     | H4     | 0.92964948179        |
| O1     | H5     | 0.081665191022       |
| C2     | H5     | 0.0074989837479      |
| C3     | H5     | 0.92378413148        |
| H4     | H5     | 0.039601820126       |
| O1     | H6     | 0.081648596304       |
| C2     | H6     | 0.0074914409453      |
| C3     | H6     | 0.9237839684         |
| H4     | H6     | 0.039600943413       |
| H5     | H6     | 0.042806564221       |
| O1     | C7     | 0.084339429242       |
| C2     | C7     | 0.95258173402        |
| C3     | C7     | 0.0073843066151      |
| H4     | C7     | 0.0015728108731      |
| H5     | C7     | 0.00094805995948     |
| H6     | C7     | 0.00094783615168     |
| O1     | H8     | 0.081524772628       |
| C2     | H8     | 0.9107244304         |
| C3     | H8     | 0.0081945095759      |
| H4     | H8     | 0.00092333402954     |
| H5     | H8     | 0.00088534457023     |
| H6     | H8     | 0.010658928075       |
| C7     | H8     | 0.040559040494       |

|     |     |                  |
|-----|-----|------------------|
| O1  | H9  | 0.081541736376   |
| C2  | H9  | 0.9108104727     |
| C3  | H9  | 0.0081899363732  |
| H4  | H9  | 0.00092325450569 |
| H5  | H9  | 0.010659018002   |
| H6  | H9  | 0.0008852490793  |
| C7  | H9  | 0.040564275055   |
| H8  | H9  | 0.041680836113   |
| O1  | O1  | 0.012592522218   |
| C2  | O1  | 0.043267520305   |
| C3  | O1  | 0.00157798916    |
| H4  | O1  | 0.00038044685525 |
| H5  | O1  | 9.4416553032e-05 |
| H6  | O1  | 9.4414801037e-05 |
| C7  | O1  | 0.9670045097     |
| H8  | O1  | 0.0036924827487  |
| H9  | O1  | 0.0036925008695  |
| O1  | H11 | 0.012003698653   |
| C2  | H11 | 0.04046127077    |
| C3  | H11 | 0.00050615386781 |
| H4  | H11 | 6.6787486362e-05 |
| H5  | H11 | 4.9071937937e-05 |
| H6  | H11 | 0.00041950149871 |
| C7  | H11 | 0.9613526428     |
| H8  | H11 | 0.010877646414   |
| H9  | H11 | 0.0039170090238  |
| O1  | H11 | 0.042165021617   |
| O1  | H12 | 0.012003909007   |
| C2  | H12 | 0.040463657093   |
| C3  | H12 | 0.00050598513866 |
| H4  | H12 | 6.6785555416e-05 |
| H5  | H12 | 0.00041951127369 |
| H6  | H12 | 4.906843456e-05  |
| C7  | H12 | 0.96135265778    |
| H8  | H12 | 0.0039169876776  |
| H9  | H12 | 0.010877625765   |
| O1  | H12 | 0.042165389616   |
| H11 | H12 | 0.041710507541   |



## DIETHYL ETHER

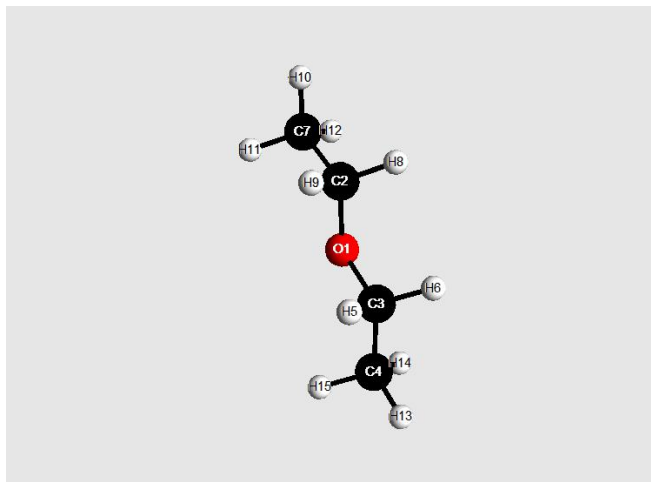

### HARTREE-FOCK

| Atom A | Atom B | Delocalization index |
|--------|--------|----------------------|
| O1     | C2     | 0.78611209114        |
| O1     | C3     | 0.78648788313        |
| C2     | C3     | 0.023701281163       |
| O1     | C4     | 0.084600068974       |
| C2     | C4     | 0.0072107048748      |
| C3     | C4     | 0.95249616165        |
| O1     | H5     | 0.081344525475       |
| C2     | H5     | 0.007926755459       |
| C3     | H5     | 0.9106704088         |
| C4     | H5     | 0.040612629451       |
| O1     | H6     | 0.081272287636       |
| C2     | H6     | 0.0079039403494      |
| C3     | H6     | 0.91068300177        |
| C4     | H6     | 0.040639310696       |
| H5     | H6     | 0.041707748332       |
| O1     | C7     | 0.084581744168       |
| C2     | C7     | 0.95241639849        |
| C3     | C7     | 0.007208553205       |
| C4     | C7     | 0.001328446972       |
| H5     | C7     | 0.00099029426948     |
| H6     | C7     | 0.00099031901066     |
| O1     | H8     | 0.081264560054       |
| C2     | H8     | 0.91067564751        |
| C3     | H8     | 0.0079155646647      |
| C4     | H8     | 0.00099006889161     |
| H5     | H8     | 0.00090020163847     |
| H6     | H8     | 0.011358758796       |
| C7     | H8     | 0.04066197862        |
| O1     | H9     | 0.081333899577       |
| C2     | H9     | 0.91072023909        |

|     |     |                  |
|-----|-----|------------------|
| C3  | H9  | 0.0079103055535  |
| C4  | H9  | 0.00099004615562 |
| H5  | H9  | 0.011359181933   |
| H6  | H9  | 0.00090003630105 |
| C7  | H9  | 0.040662501171   |
| H8  | H9  | 0.041699647692   |
| O1  | O1  | 0.012582125783   |
| C2  | O1  | 0.043267843782   |
| C3  | O1  | 0.0015053541512  |
| C4  | O1  | 0.00030801386847 |
| H5  | O1  | 8.2887857972e-05 |
| H6  | O1  | 8.2885291113e-05 |
| C7  | O1  | 0.96713950608    |
| H8  | O1  | 0.003699503079   |
| H9  | O1  | 0.0036994163443  |
| O1  | H11 | 0.012030650834   |
| C2  | H11 | 0.040432291659   |
| C3  | H11 | 0.00048990150618 |
| C4  | H11 | 6.5842255947e-05 |
| H5  | H11 | 4.9486258392e-05 |
| H6  | H11 | 0.00043828344597 |
| C7  | H11 | 0.96142501585    |
| H8  | H11 | 0.010875454744   |
| H9  | H11 | 0.0039184564946  |
| O1  | H11 | 0.042226996816   |
| O1  | H12 | 0.012032933849   |
| C2  | H12 | 0.040465800758   |
| C3  | H12 | 0.00048970373145 |
| C4  | H12 | 6.5834578563e-05 |
| H5  | H12 | 0.0004383056084  |
| H6  | H12 | 4.947855541e-05  |
| C7  | H12 | 0.96139672137    |
| H8  | H12 | 0.003918521723   |
| H9  | H12 | 0.010875427101   |
| O1  | H12 | 0.042227165058   |
| H11 | H12 | 0.041797772264   |
| O1  | H13 | 0.012583587667   |
| C2  | H13 | 0.0015056500651  |
| C3  | H13 | 0.043276367394   |
| C4  | H13 | 0.96700613478    |
| H5  | H13 | 0.003697157414   |
| H6  | H13 | 0.0036971066402  |
| C7  | H13 | 0.00030807601134 |
| H8  | H13 | 8.2928301495e-05 |
| H9  | H13 | 8.2927809334e-05 |
| O1  | H13 | 0.00013524716241 |
| H11 | H13 | 1.6731705291e-05 |
| H12 | H13 | 1.6731756352e-05 |

|     |     |                  |
|-----|-----|------------------|
| O1  | H14 | 0.012038909871   |
| C2  | H14 | 0.00049028663704 |
| C3  | H14 | 0.040520392049   |
| C4  | H14 | 0.9613832505     |
| H5  | H14 | 0.010877457907   |
| H6  | H14 | 0.0039175197004  |
| C7  | H14 | 6.5861858376e-05 |
| H8  | H14 | 4.9480623784e-05 |
| H9  | H14 | 0.00043834258491 |
| O1  | H14 | 1.6734190902e-05 |
| H11 | H14 | 4.5869375118e-06 |
| H12 | H14 | 2.402996618e-05  |
| H13 | H14 | 0.04222877206    |
| O1  | H15 | 0.012036269004   |
| C2  | H15 | 0.00048957188224 |
| C3  | H15 | 0.040456673783   |
| C4  | H15 | 0.96138008022    |
| H5  | H15 | 0.0039176561733  |
| H6  | H15 | 0.010877392903   |
| C7  | H15 | 6.5863932102e-05 |
| H8  | H15 | 0.00043834732297 |
| H9  | H15 | 4.947793955e-05  |
| O1  | H15 | 1.6734148634e-05 |
| H11 | H15 | 2.4030011334e-05 |
| H12 | H15 | 4.5869029627e-06 |
| H13 | H15 | 0.04222859438    |
| H14 | H15 | 0.041797219424   |

## DIMETHYL ETHER

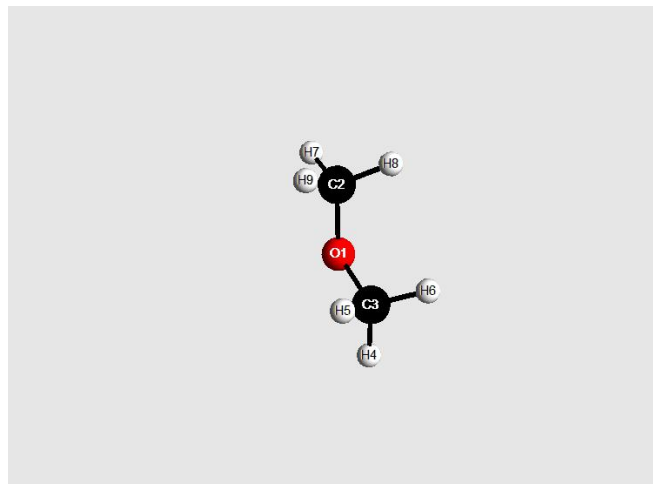

### HARTREE-FOCK

| Atom A | Atom B | Delocalization index |
|--------|--------|----------------------|
| O1     | C2     | 0.80976507563        |
| O1     | C3     | 0.80978686979        |
| C2     | C3     | 0.026194740651       |
| O1     | H4     | 0.071409095931       |
| C2     | H4     | 0.0081005858252      |
| C3     | H4     | 0.92970284766        |
| O1     | H5     | 0.082047373033       |
| C2     | H5     | 0.0077486947139      |
| C3     | H5     | 0.92402263088        |
| H4     | H5     | 0.039455614514       |
| O1     | H6     | 0.08197664828        |
| C2     | H6     | 0.0077529130894      |
| C3     | H6     | 0.92400370661        |
| H4     | H6     | 0.039455314555       |
| H5     | H6     | 0.042757983036       |
| O1     | H7     | 0.071404699244       |
| C2     | H7     | 0.92976845812        |
| C3     | H7     | 0.0081014410814      |
| H4     | H7     | 0.0018244061061      |
| H5     | H7     | 0.00087158649129     |
| H6     | H7     | 0.00087156099614     |
| O1     | H8     | 0.081964332222       |
| C2     | H8     | 0.9240086477         |
| C3     | H8     | 0.0077570867882      |
| H4     | H8     | 0.00087164798931     |
| H5     | H8     | 0.00086825154669     |
| H6     | H8     | 0.0099781985026      |
| H7     | H8     | 0.039469385094       |
| O1     | H9     | 0.082031991903       |
| C2     | H9     | 0.92399391499        |

|    |    |                  |
|----|----|------------------|
| C3 | H9 | 0.0077643228232  |
| H4 | H9 | 0.00087158545764 |
| H5 | H9 | 0.0099783586069  |
| H6 | H9 | 0.00086820010891 |
| H7 | H9 | 0.039469367302   |
| H8 | H9 | 0.042771070662   |

#### CCSD

| Atom A | Atom B | Delocalization index |
|--------|--------|----------------------|
| O1     | C2     | 0.77170076661        |
| O1     | C3     | 0.77182249889        |
| C2     | C3     | 0.029313878427       |
| O1     | H4     | 0.052263457408       |
| C2     | H4     | 0.0072984283391      |
| C3     | H4     | 0.80496270494        |
| O1     | H5     | 0.06073945413        |
| C2     | H5     | 0.0081398834681      |
| C3     | H5     | 0.79694338001        |
| H4     | H5     | 0.030451236925       |
| O1     | H6     | 0.060654599084       |
| C2     | H6     | 0.0081469774631      |
| C3     | H6     | 0.79696134326        |
| H4     | H6     | 0.030450869403       |
| H5     | H6     | 0.033265466395       |
| O1     | H7     | 0.052261101493       |
| C2     | H7     | 0.80484255537        |
| C3     | H7     | 0.0073006436045      |
| H4     | H7     | 0.0017879538162      |
| H5     | H7     | 0.00082874703448     |
| H6     | H7     | 0.00082873928119     |
| O1     | H8     | 0.060651425175       |
| C2     | H8     | 0.79697809893        |
| C3     | H8     | 0.0081580106808      |
| H4     | H8     | 0.00082880761059     |
| H5     | H8     | 0.00096819283965     |
| H6     | H8     | 0.011711973835       |
| H7     | H8     | 0.0304509392         |
| O1     | H9     | 0.060733213896       |
| C2     | H9     | 0.79693685334        |
| C3     | H9     | 0.0081533973569      |
| H4     | H9     | 0.0008287590478      |
| H5     | H9     | 0.011711927457       |
| H6     | H9     | 0.00096812342216     |
| H7     | H9     | 0.030450829137       |
| H8     | H9     | 0.033265391935       |

# HALOALKANES

## CARBON TETRAFLUORIDE

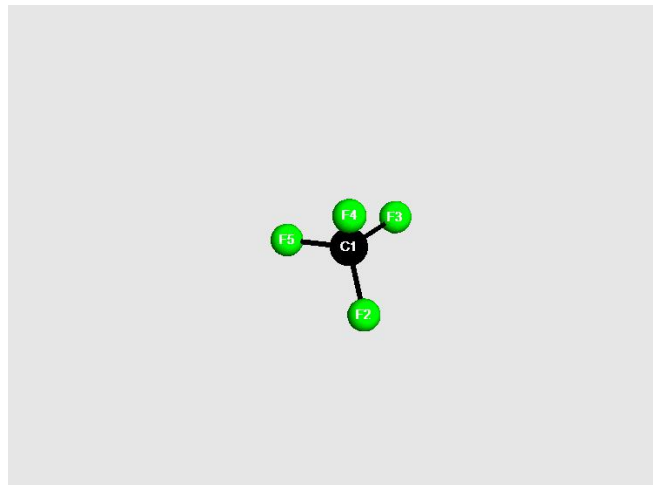

### HARTREE-FOCK

| Atom A | Atom B | Delocalization index |
|--------|--------|----------------------|
| C1     | F2     | 0.46263456844        |
| C1     | F3     | 0.46288235698        |
| F2     | F3     | 0.17709605781        |
| C1     | F4     | 0.4629095603         |
| F2     | F4     | 0.17709517762        |
| F3     | F4     | 0.17709947035        |
| C1     | F5     | 0.46349482168        |
| F2     | F5     | 0.17709563626        |
| F3     | F5     | 0.17709603509        |
| F4     | F5     | 0.17709558756        |

### CCSD

| Atom A | Atom B | Delocalization index |
|--------|--------|----------------------|
| C1     | F2     | 0.51245827221        |
| C1     | F3     | 0.51256985196        |
| F2     | F3     | 0.14408669362        |
| C1     | F4     | 0.51185718452        |
| F2     | F4     | 0.14408732773        |
| F3     | F4     | 0.14408828987        |
| C1     | F5     | 0.5119439795         |
| F2     | F5     | 0.14408752425        |
| F3     | F5     | 0.14408883666        |
| F4     | F5     | 0.14408772725        |

## DIFLUOROMETHANE

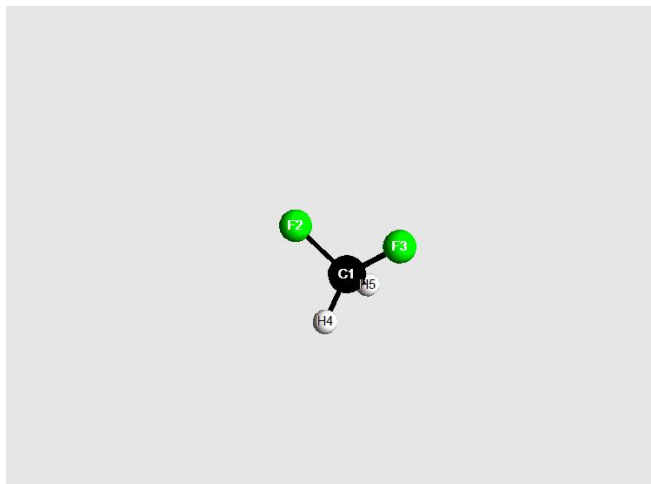

## HARTREE-FOCK

| Atom A | Atom B | Delocalization index |
|--------|--------|----------------------|
| C1     | F2     | 0.65631797883        |
| C1     | F3     | 0.65634896516        |
| F2     | F3     | 0.16867621951        |
| C1     | H4     | 0.88431253161        |
| F2     | H4     | 0.072155769785       |
| F3     | H4     | 0.072119495231       |
| C1     | H5     | 0.88426788966        |
| F2     | H5     | 0.072155590937       |
| F3     | H5     | 0.072119330039       |
| H4     | H5     | 0.030986661182       |

## DIBROMOMETHANE

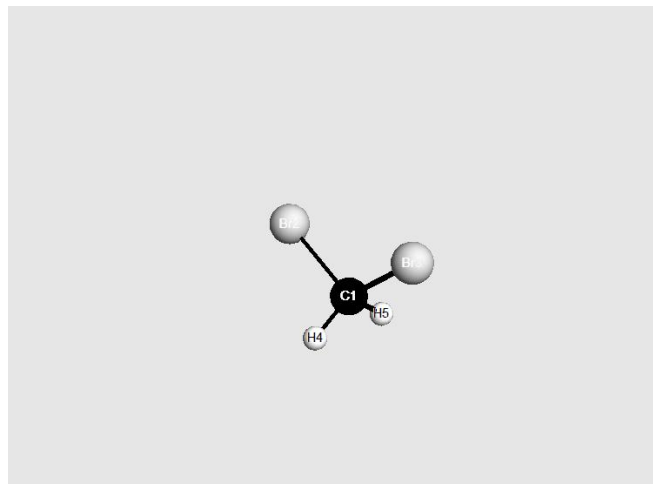

### HARTREE-FOCK

| Atom A | Atom B | Delocalization index |
|--------|--------|----------------------|
| C1     | Br2    | 1.1085189935         |
| C1     | Br3    | 1.1084620436         |
| Br2    | Br3    | 0.1485581641         |
| C1     | H4     | 0.94130420754        |
| Br2    | H4     | 0.057686771888       |
| Br3    | H4     | 0.057686119338       |
| C1     | H5     | 0.941281528          |
| Br2    | H5     | 0.057686801358       |
| Br3    | H5     | 0.05768629047        |
| H4     | H5     | 0.027466666926       |



## DICHLOROMETHANE

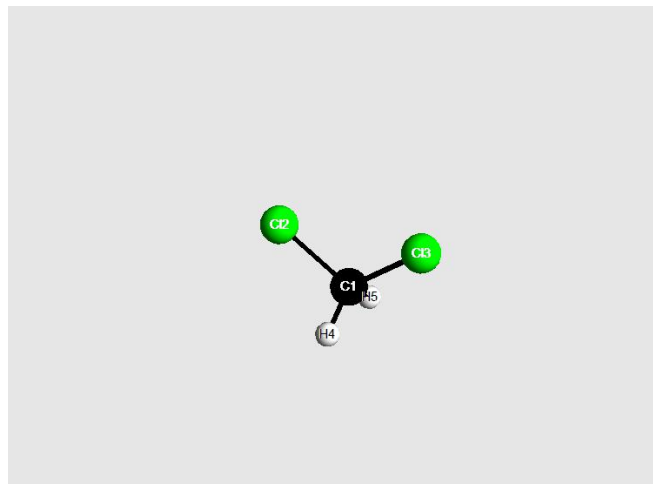

### HARTREE-FOCK

| Atom A | Atom B | Delocalization index |
|--------|--------|----------------------|
| C1     | Cl2    | 1.0647297064         |
| C1     | Cl3    | 1.0647446424         |
| Cl2    | Cl3    | 0.15384385383        |
| C1     | H4     | 0.92677841171        |
| Cl2    | H4     | 0.062244366564       |
| Cl3    | H4     | 0.062244258301       |
| C1     | H5     | 0.92678697357        |
| Cl2    | H5     | 0.062244206574       |
| Cl3    | H5     | 0.062244119835       |
| H4     | H5     | 0.027120075493       |

# INORGANICS

## OSMIUM OXIDE (VIII)

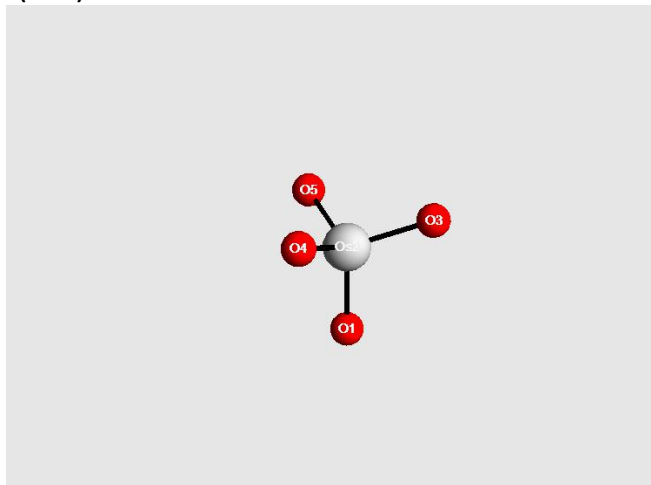

### HARTREE-FOCK

| Atom A | Atom B | Delocalization index |
|--------|--------|----------------------|
| O1     | Os2    | 1.6940155477         |
| O1     | O3     | 0.18877832535        |
| Os2    | O3     | 1.6940386718         |
| O1     | O4     | 0.18877822738        |
| Os2    | O4     | 1.6939738897         |
| O3     | O4     | 0.18877826793        |
| O1     | O5     | 0.18877825758        |
| Os2    | O5     | 1.6939637201         |
| O3     | O5     | 0.18877842227        |
| O4     | O5     | 0.18877828669        |

## MAGNESIUM OXIDE

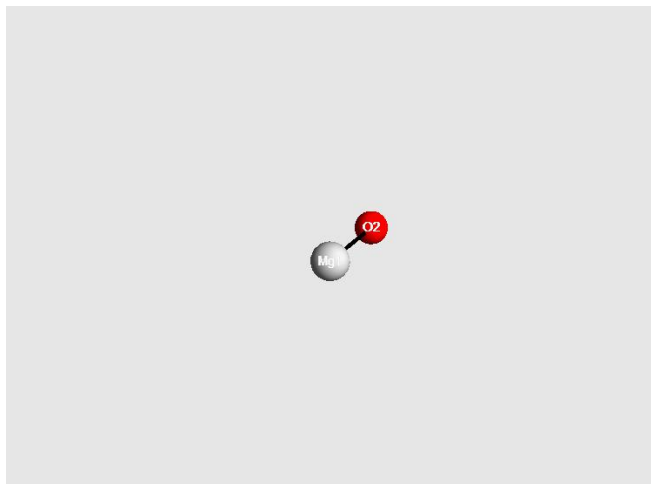

### HARTREE-FOCK

| Atom A | Atom B | Delocalization index |
|--------|--------|----------------------|
| Mg1    | O2     | 1.0084532771         |

### CCSD

| Atom A | Atom B | Delocalization index |
|--------|--------|----------------------|
| Mg1    | O2     | 0.84122171716        |

## HEXAFLUOROPHOSPHATE ANION

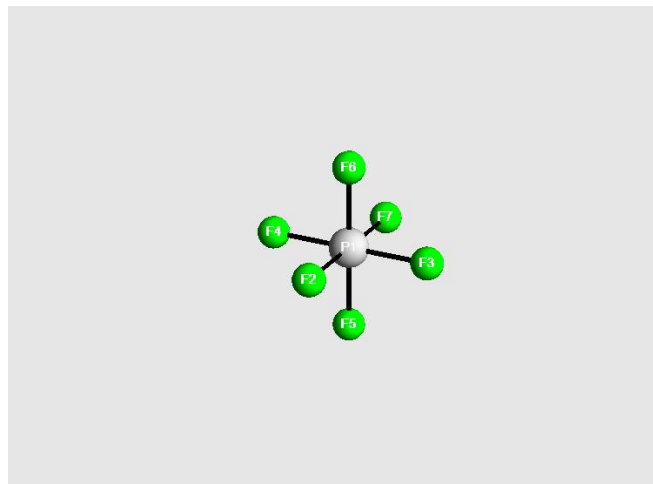

### HARTREE-FOCK

| Atom A | Atom B | Delocalization index |
|--------|--------|----------------------|
| P1     | F2     | 0.29635030296        |
| P1     | F3     | 0.29584529262        |
| F2     | F3     | 0.14372342302        |
| P1     | F4     | 0.29584772367        |
| F2     | F4     | 0.14372765911        |
| F3     | F4     | 0.0027887530299      |
| P1     | F5     | 0.29584839252        |
| F2     | F5     | 0.14372396541        |
| F3     | F5     | 0.14372366554        |
| F4     | F5     | 0.14372748786        |
| P1     | F6     | 0.29584649233        |
| F2     | F6     | 0.14373158177        |
| F3     | F6     | 0.14372624115        |
| F4     | F6     | 0.14372047786        |
| F5     | F6     | 0.0027888462576      |
| P1     | F7     | 0.29634664718        |
| F2     | F7     | 0.0027889868964      |
| F3     | F7     | 0.14372978375        |
| F4     | F7     | 0.1437217869         |
| F5     | F7     | 0.14373266101        |
| F6     | F7     | 0.14372660307        |

### CCSD

| Atom A | Atom B | Delocalization index |
|--------|--------|----------------------|
| P1     | F2     | 0.31498318122        |
| P1     | F3     | 0.31444929451        |
| F2     | F3     | 0.12981489746        |
| P1     | F4     | 0.31444931234        |
| F2     | F4     | 0.12981871441        |
| F3     | F4     | 0.0029746806511      |

|    |    |                 |
|----|----|-----------------|
| P1 | F5 | 0.31445095926   |
| F2 | F5 | 0.12981739278   |
| F3 | F5 | 0.12981337882   |
| F4 | F5 | 0.12981797922   |
| P1 | F6 | 0.31445085778   |
| F2 | F6 | 0.12981968944   |
| F3 | F6 | 0.12981757096   |
| F4 | F6 | 0.12981400205   |
| F5 | F6 | 0.0029748095536 |
| P1 | F7 | 0.3149866431    |
| F2 | F7 | 0.0029749996714 |
| F3 | F7 | 0.12981874248   |
| F4 | F7 | 0.12981742223   |
| F5 | F7 | 0.12982190682   |
| F6 | F7 | 0.12981739214   |

## SULFUR HEXAFLUORIDE

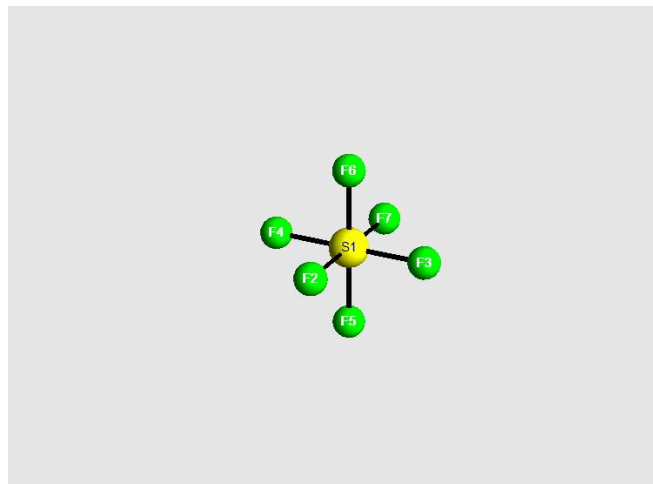

### HARTREE-FOCK

| Atom A | Atom B | Delocalization index |
|--------|--------|----------------------|
| S1     | F2     | 0.46354179029        |
| S1     | F3     | 0.46294254816        |
| F2     | F3     | 0.15754152367        |
| S1     | F4     | 0.46295149484        |
| F2     | F4     | 0.15754452879        |
| F3     | F4     | 0.0052777142439      |
| S1     | F5     | 0.4629456623         |
| F2     | F5     | 0.15754628121        |
| F3     | F5     | 0.15753813619        |
| F4     | F5     | 0.15754197501        |
| S1     | F6     | 0.46294816264        |
| F2     | F6     | 0.15754256146        |
| F3     | F6     | 0.15754661185        |
| F4     | F6     | 0.15754514035        |
| F5     | F6     | 0.0052777760927      |
| S1     | F7     | 0.46354431421        |
| F2     | F7     | 0.0052778638425      |
| F3     | F7     | 0.15754393638        |
| F4     | F7     | 0.15754122776        |
| F5     | F7     | 0.15754410401        |
| F6     | F7     | 0.1575446276         |

### CCSD

| Atom A | Atom B | Delocalization index |
|--------|--------|----------------------|
| S1     | F2     | 0.49835965102        |
| S1     | F3     | 0.49776634019        |
| F2     | F3     | 0.12870512666        |
| S1     | F4     | 0.49776758304        |
| F2     | F4     | 0.12870535167        |
| F3     | F4     | 0.0046026099764      |

|    |    |                 |
|----|----|-----------------|
| S1 | F5 | 0.49776586742   |
| F2 | F5 | 0.12870567317   |
| F3 | F5 | 0.12870431692   |
| F4 | F5 | 0.12870379055   |
| S1 | F6 | 0.49776529339   |
| F2 | F6 | 0.12870519839   |
| F3 | F6 | 0.12870417219   |
| F4 | F6 | 0.128703206     |
| F5 | F6 | 0.0046026587998 |
| S1 | F7 | 0.49835673477   |
| F2 | F7 | 0.0046027573167 |
| F3 | F7 | 0.12870420574   |
| F4 | F7 | 0.12870200949   |
| F5 | F7 | 0.12870454126   |
| F6 | F7 | 0.1287039509    |

## PLATINATE (VII) ANION

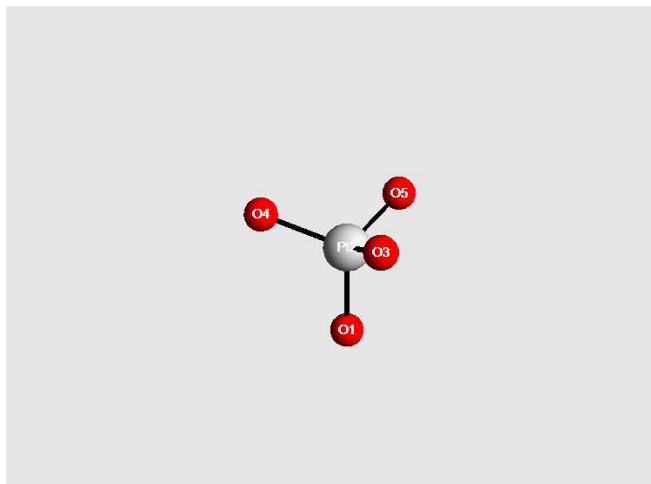

## HARTREE-FOCK

| Atom A | Atom B | Delocalization index |
|--------|--------|----------------------|
| O1     | Pt2    | 1.6785221589         |
| O1     | O3     | 0.31858693526        |
| Pt2    | O3     | 1.6785214043         |
| O1     | O4     | 0.31858724186        |
| Pt2    | O4     | 1.6784957409         |
| O3     | O4     | 0.3185881796         |
| O1     | O5     | 0.31858712241        |
| Pt2    | O5     | 1.678504162          |
| O3     | O5     | 0.31858797748        |
| O4     | O5     | 0.31859037431        |



## SODIUM CHLORIDE

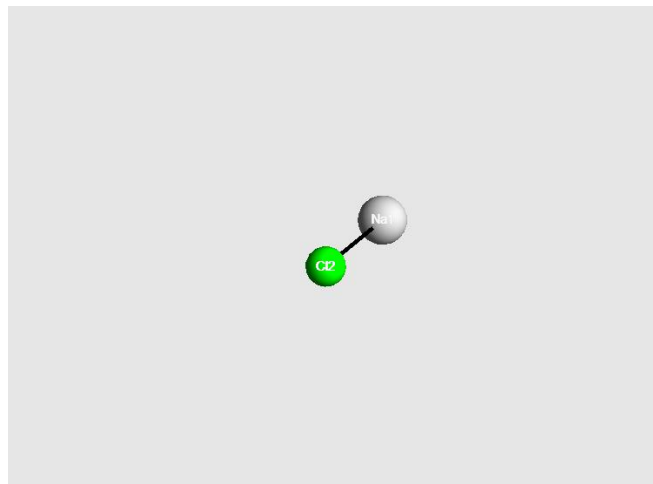

### HARTREE-FOCK

| Atom A | Atom B | Delocalization index |
|--------|--------|----------------------|
| Na1    | Cl2    | 0.21571872708        |

### CCSD

| Atom A | Atom B | Delocalization index |
|--------|--------|----------------------|
| Na1    | Cl2    | 0.22182137578        |

## LITHIUM HYDRIDE

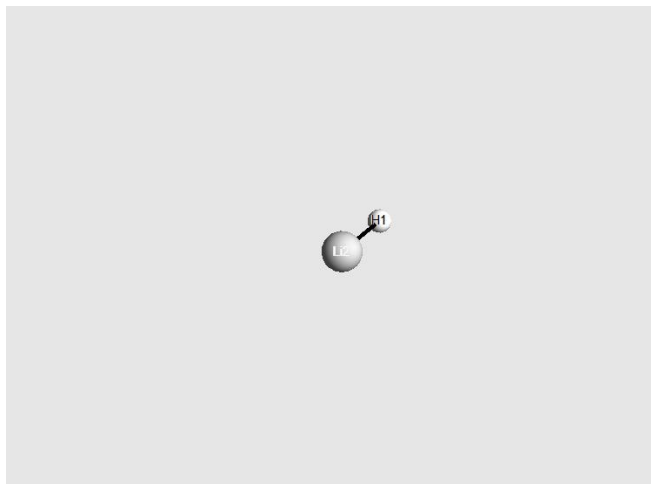

### HARTREE-FOCK

| Atom A | Atom B | Delocalization index |
|--------|--------|----------------------|
| H1     | Li2    | 0.19251326055        |

### CCSD

| Atom A | Atom B | Delocalization index |
|--------|--------|----------------------|
| H1     | Li2    | 0.19881788123        |

## HYDROGEN DISULFIDE

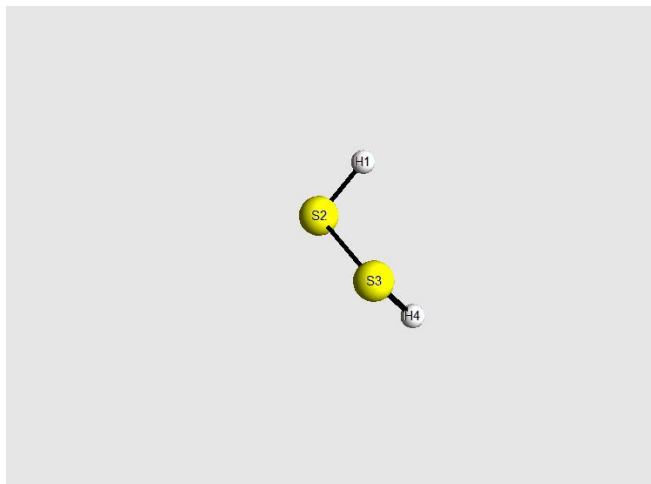

### HARTREE-FOCK

| Atom A | Atom B | Delocalization index |
|--------|--------|----------------------|
| H1     | S2     | 1.1183518991         |
| H1     | S3     | 0.071030764268       |
| S2     | S3     | 1.286936101          |
| H1     | H4     | 0.0032718605291      |
| S2     | H4     | 0.071031938658       |
| S3     | H4     | 1.1183136072         |

### CCSD

| Atom A | Atom B | Delocalization index |
|--------|--------|----------------------|
| H1     | S2     | 0.93472466101        |
| H1     | S3     | 0.055216251071       |
| S2     | S3     | 1.0247151309         |
| H1     | H4     | 0.0027599645372      |
| S2     | H4     | 0.055217608208       |
| S3     | H4     | 0.93461844082        |

## TETRAFLUOROBERYLLATE ANION

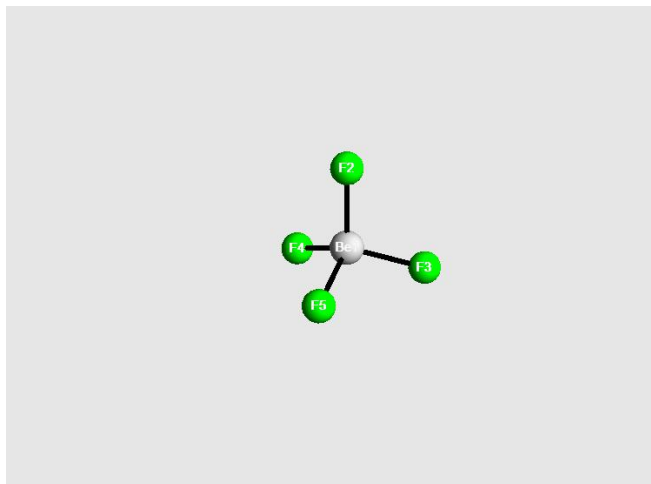

### HARTREE-FOCK

| Atom A | Atom B | Delocalization index |
|--------|--------|----------------------|
| Be1    | F2     | 0.10944091762        |
| Be1    | F3     | 0.10954409622        |
| F2     | F3     | 0.08831942241        |
| Be1    | F4     | 0.10932682592        |
| F2     | F4     | 0.088319322537       |
| F3     | F4     | 0.088318366091       |
| Be1    | F5     | 0.10944913541        |
| F2     | F5     | 0.088318937906       |
| F3     | F5     | 0.088317965429       |
| F4     | F5     | 0.088319921018       |

### CCSD

| Atom A | Atom B | Delocalization index |
|--------|--------|----------------------|
| Be1    | F2     | 0.11431914618        |
| Be1    | F3     | 0.11444638201        |
| F2     | F3     | 0.092265132744       |
| Be1    | F4     | 0.11416780239        |
| F2     | F4     | 0.09226408373        |
| F3     | F4     | 0.092263960497       |
| Be1    | F5     | 0.11432204044        |
| F2     | F5     | 0.092263807077       |
| F3     | F5     | 0.09226295118        |
| F4     | F5     | 0.092264675734       |

## HEXAFLUOROALUMINATE ANION

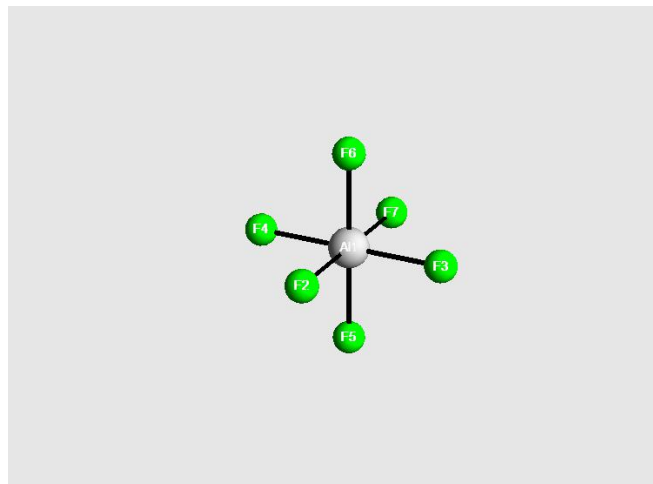

### HARTREE-FOCK

| Atom A | Atom B | Delocalization index |
|--------|--------|----------------------|
| Al1    | F2     | 0.125338435          |
| Al1    | F3     | 0.12548698289        |
| F2     | F3     | 0.076036844429       |
| Al1    | F4     | 0.12548036688        |
| F2     | F4     | 0.076054290183       |
| F3     | F4     | 0.0011682540487      |
| Al1    | F5     | 0.12548870845        |
| F2     | F5     | 0.076043566567       |
| F3     | F5     | 0.076033220945       |
| F4     | F5     | 0.076056603308       |
| Al1    | F6     | 0.12548042402        |
| F2     | F6     | 0.076061847723       |
| F3     | F6     | 0.076056716426       |
| F4     | F6     | 0.076033297379       |
| F5     | F6     | 0.0011683352355      |
| Al1    | F7     | 0.12533752809        |
| F2     | F7     | 0.001168449059       |
| F3     | F7     | 0.076054712562       |
| F4     | F7     | 0.076037381402       |
| F5     | F7     | 0.076061771597       |
| F6     | F7     | 0.076042344999       |

### CCSD

| Atom A | Atom B | Delocalization index |
|--------|--------|----------------------|
| Al1    | F2     | 0.12925369659        |
| Al1    | F3     | 0.12943593352        |
| F2     | F3     | 0.078551367411       |
| Al1    | F4     | 0.12942775962        |
| F2     | F4     | 0.078567577335       |
| F3     | F4     | 0.0019970032325      |

|     |    |                 |
|-----|----|-----------------|
| A11 | F5 | 0.12943730732   |
| F2  | F5 | 0.078557348078  |
| F3  | F5 | 0.078546988095  |
| F4  | F5 | 0.078566695236  |
| A11 | F6 | 0.12942625911   |
| F2  | F6 | 0.07857446711   |
| F3  | F6 | 0.078568258752  |
| F4  | F6 | 0.078546689564  |
| F5  | F6 | 0.0019971996264 |
| A11 | F7 | 0.12925031536   |
| F2  | F7 | 0.0019974687421 |
| F3  | F7 | 0.078568251504  |
| F4  | F7 | 0.078549899324  |
| F5  | F7 | 0.078574671366  |
| F6  | F7 | 0.078556419436  |

## TETRAFLUOROAMMONIUM

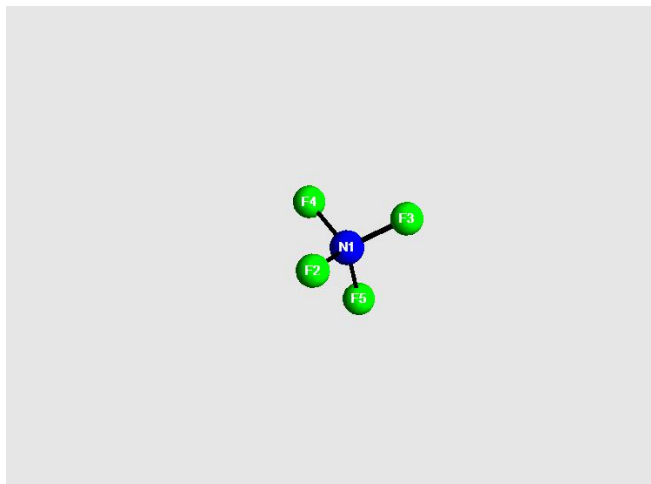

### HARTREE-FOCK

| Atom A | Atom B | Delocalization index |
|--------|--------|----------------------|
| N1     | F2     | 1.0617882351         |
| N1     | F3     | 1.0618045525         |
| F2     | F3     | 0.11959838554        |
| N1     | F4     | 1.0613558455         |
| F2     | F4     | 0.11959805282        |
| F3     | F4     | 0.11960253997        |
| N1     | F5     | 1.0613591438         |
| F2     | F5     | 0.11959840154        |
| F3     | F5     | 0.11960217464        |
| F4     | F5     | 0.11960149873        |

### CCSD

| Atom A | Atom B | Delocalization index |
|--------|--------|----------------------|
| N1     | F2     | 0.87671004814        |
| N1     | F3     | 0.87670927529        |
| F2     | F3     | 0.09813905107        |
| N1     | F4     | 0.8762865466         |
| F2     | F4     | 0.09813944584        |
| F3     | F4     | 0.0981382739         |
| N1     | F5     | 0.8762788101         |
| F2     | F5     | 0.098138975933       |
| F3     | F5     | 0.098139298989       |
| F4     | F5     | 0.098140058428       |

## WATER

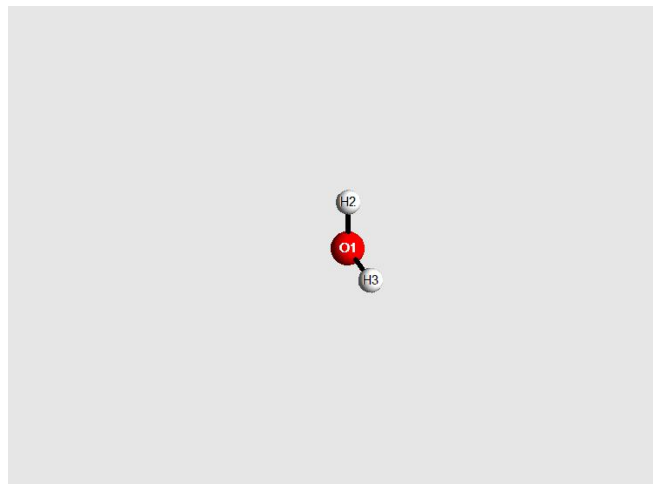

### HARTREE-FOCK

| Atom A | Atom B | Delocalization index |
|--------|--------|----------------------|
| O1     | H2     | 0.61649611339        |
| O1     | H3     | 0.61649789234        |
| H2     | H3     | 0.0067544084164      |

### CCSD

| Atom A | Atom B | Delocalization index |
|--------|--------|----------------------|
| O1     | H2     | 0.61466493859        |
| O1     | H3     | 0.61466623586        |
| H2     | H3     | 0.0087446804635      |



## CARBON MONOXIDE

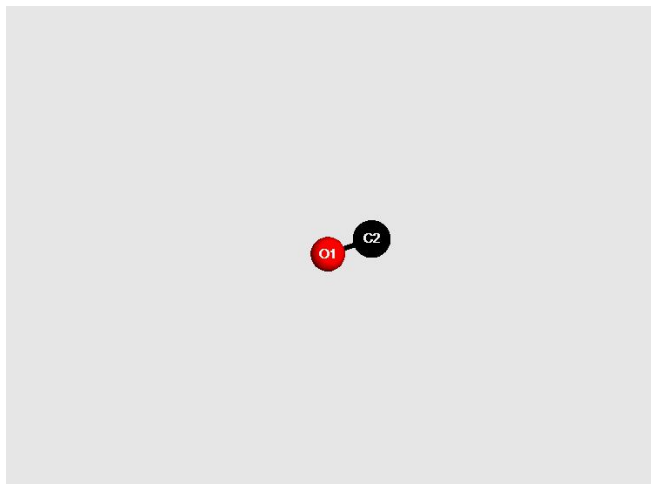

### HARTREE-FOCK

| Atom A | Atom B | Delocalization index |
|--------|--------|----------------------|
| O1     | C2     | 1.5732996512         |

### CCSD

| Atom A | Atom B | Delocalization index |
|--------|--------|----------------------|
| O1     | C2     | 1.4525188951         |

## TETRAFLUOROBORATE ANION

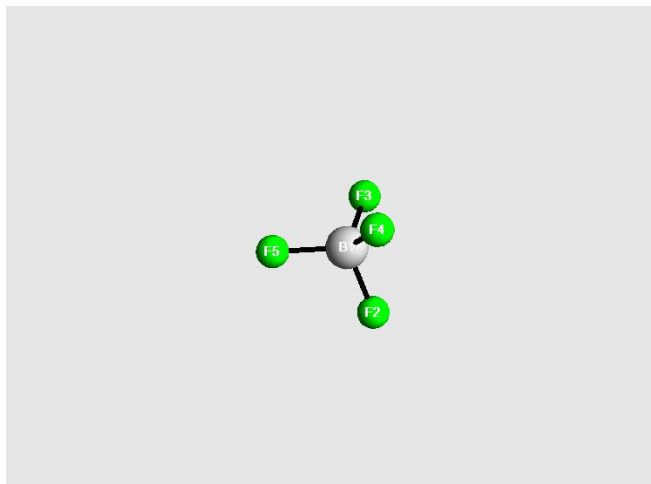

### HARTREE-FOCK

| Atom A | Atom B | Delocalization index |
|--------|--------|----------------------|
| B1     | F2     | 0.21086019475        |
| B1     | F3     | 0.2111575468         |
| F2     | F3     | 0.15245290867        |
| B1     | F4     | 0.21031565541        |
| F2     | F4     | 0.152453872          |
| F3     | F4     | 0.15245413703        |
| B1     | F5     | 0.21067184241        |
| F2     | F5     | 0.15245367321        |
| F3     | F5     | 0.1524517972         |
| F4     | F5     | 0.15245396744        |

### CCSD

| Atom A | Atom B | Delocalization index |
|--------|--------|----------------------|
| B1     | F2     | 0.22768175454        |
| B1     | F3     | 0.22797045856        |
| F2     | F3     | 0.14428975817        |
| B1     | F4     | 0.2270544957         |
| F2     | F4     | 0.14429091339        |
| F3     | F4     | 0.14429070137        |
| B1     | F5     | 0.22738787218        |
| F2     | F5     | 0.14429170002        |
| F3     | F5     | 0.14428975334        |
| F4     | F5     | 0.14429021221        |

## CHLORINE HEXAFLUORIDE ANION

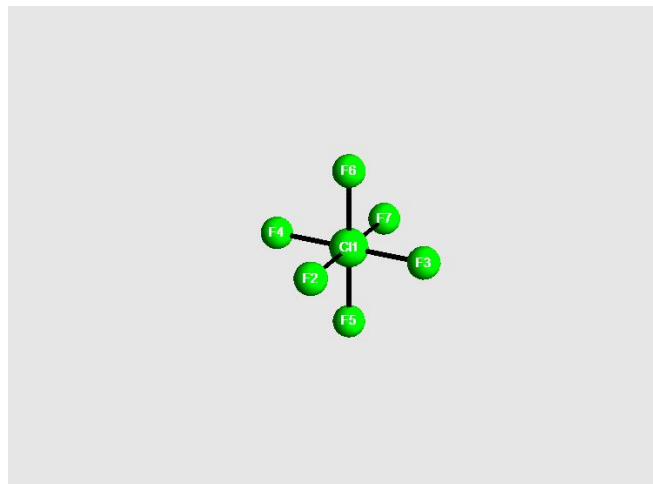

### HARTREE-FOCK

| Atom A | Atom B | Delocalization index |
|--------|--------|----------------------|
| Cl1    | F2     | 0.80082537293        |
| Cl1    | F3     | 0.80029955443        |
| F2     | F3     | 0.1378632739         |
| Cl1    | F4     | 0.80030458526        |
| F2     | F4     | 0.13786189719        |
| F3     | F4     | 0.011686478131       |
| Cl1    | F5     | 0.80030264271        |
| F2     | F5     | 0.13786135211        |
| F3     | F5     | 0.13786290109        |
| F4     | F5     | 0.13786056463        |
| Cl1    | F6     | 0.80030399718        |
| F2     | F6     | 0.13786536799        |
| F3     | F6     | 0.13786377988        |
| F4     | F6     | 0.13786337751        |
| F5     | F6     | 0.011686540742       |
| Cl1    | F7     | 0.80082505418        |
| F2     | F7     | 0.011686598651       |
| F3     | F7     | 0.13786317316        |
| F4     | F7     | 0.13786301183        |
| F5     | F7     | 0.13786444466        |
| F6     | F7     | 0.1378633541         |

### CCSD

| Atom A | Atom B | Delocalization index |
|--------|--------|----------------------|
| Cl1    | F2     | 0.71661977076        |
| Cl1    | F3     | 0.71613405241        |
| F2     | F3     | 0.10514763593        |
| Cl1    | F4     | 0.71613530861        |
| F2     | F4     | 0.10514905034        |
| F3     | F4     | 0.0092849450336      |

|     |    |                 |
|-----|----|-----------------|
| Cl1 | F5 | 0.71613636592   |
| F2  | F5 | 0.1051504841    |
| F3  | F5 | 0.10514909421   |
| F4  | F5 | 0.10514906406   |
| Cl1 | F6 | 0.71613308671   |
| F2  | F6 | 0.10514951713   |
| F3  | F6 | 0.10514860438   |
| F4  | F6 | 0.10514866453   |
| F5  | F6 | 0.0092850032819 |
| Cl1 | F7 | 0.71661776308   |
| F2  | F7 | 0.0092850631614 |
| F3  | F7 | 0.10514813267   |
| F4  | F7 | 0.10514926794   |
| F5  | F7 | 0.10514959839   |
| F6  | F7 | 0.10514879278   |

## OXYGEN

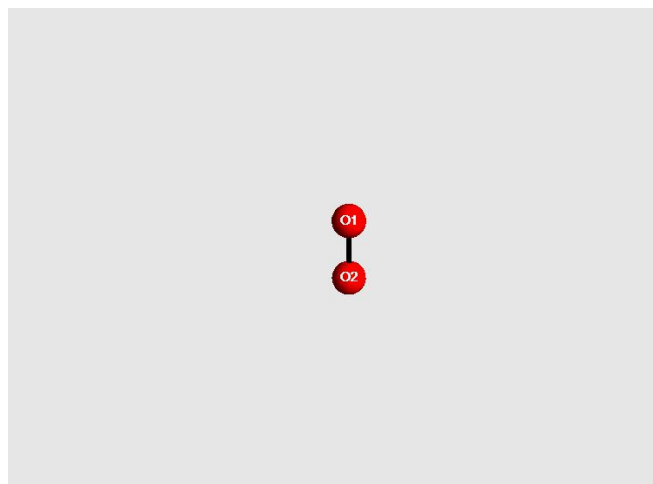

### HARTREE-FOCK

| Atom A | Atom B | Delocalization index |
|--------|--------|----------------------|
| O1     | O2     | 2.2715486647         |

### CCSD

| Atom A | Atom B | Delocalization index |
|--------|--------|----------------------|
| O1     | O2     | 1.6147737861         |

## ORTHOTUNGSTATE ANION

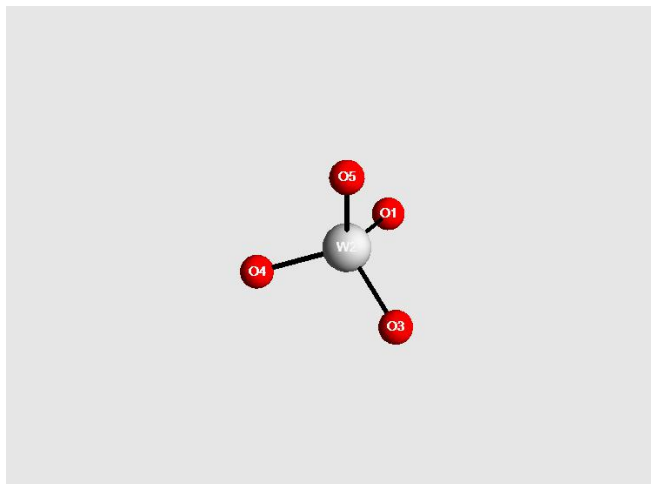

## HARTREE-FOCK

| Atom A | Atom B | Delocalization index |
|--------|--------|----------------------|
| O1     | W2     | 1.5678940748         |
| O1     | O3     | 0.078935966268       |
| W2     | O3     | 1.5678850354         |
| O1     | O4     | 0.078935895391       |
| W2     | O4     | 1.5678937791         |
| O3     | O4     | 0.0789357329         |
| O1     | O5     | 0.078935998382       |
| W2     | O5     | 1.5678829818         |
| O3     | O5     | 0.078935842738       |
| O4     | O5     | 0.078935759329       |

## HYDROGEN SULFIDE

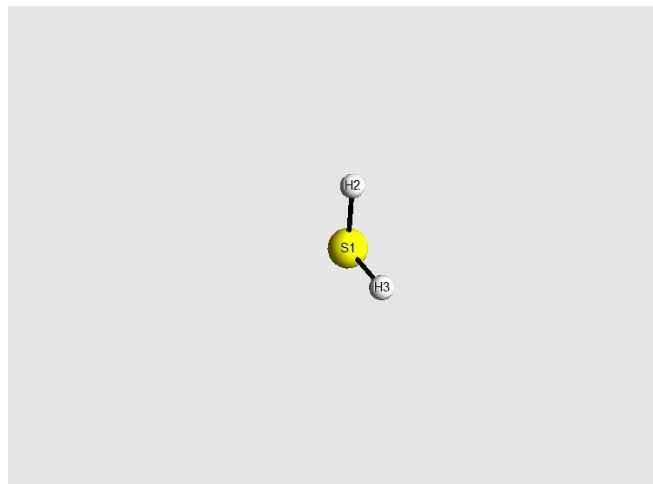

### HARTREE-FOCK

| Atom A | Atom B | Delocalization index |
|--------|--------|----------------------|
| S1     | H2     | 1.1422431297         |
| S1     | H3     | 1.1422414432         |
| H2     | H3     | 0.055611114221       |

### CCSD

| Atom A | Atom B | Delocalization index |
|--------|--------|----------------------|
| S1     | H2     | 0.95510496958        |
| S1     | H3     | 0.95510613128        |
| H2     | H3     | 0.043339705927       |

## OZONE

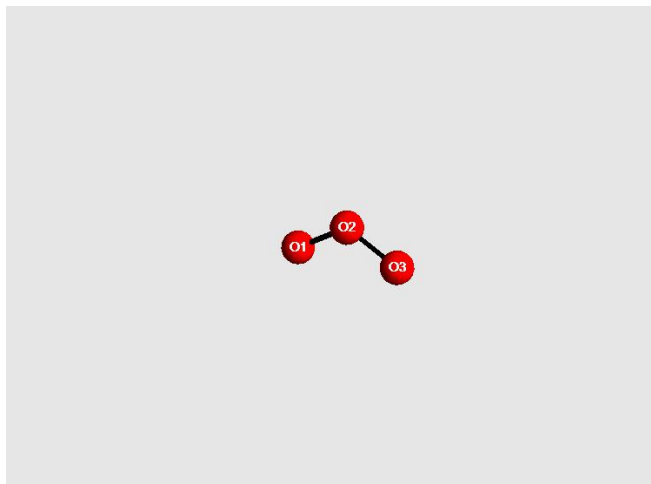

### HARTREE-FOCK

| Atom A | Atom B | Delocalization index |
|--------|--------|----------------------|
| O1     | O2     | 1.7245550924         |
| O1     | O3     | 0.47895663764        |
| O2     | O3     | 1.7244070734         |

### CCSD

| Atom A | Atom B | Delocalization index |
|--------|--------|----------------------|
| O1     | O2     | 1.259069141          |
| O1     | O3     | 0.33337892095        |
| O2     | O3     | 1.2590653644         |



## HEXAFLUROSILICATE ANION

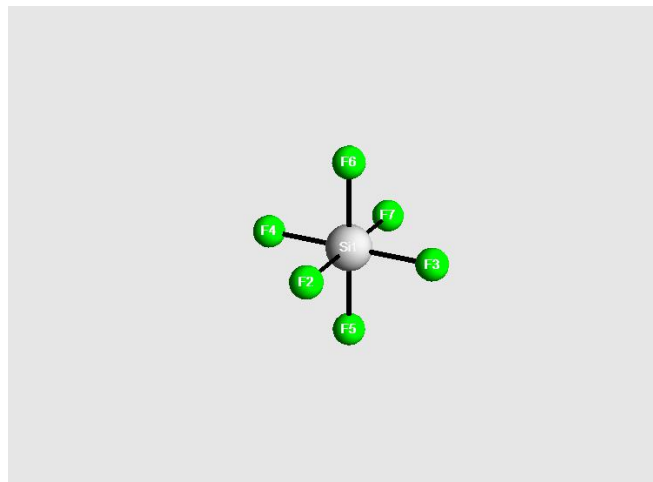

### HARTREE-FOCK

| Atom A | Atom B | Delocalization index |
|--------|--------|----------------------|
| Si1    | F2     | 0.19704894773        |
| Si1    | F3     | 0.19652974887        |
| F2     | F3     | 0.11374966592        |
| Si1    | F4     | 0.19652709227        |
| F2     | F4     | 0.11376435887        |
| F3     | F4     | 0.001581736976       |
| Si1    | F5     | 0.19652966508        |
| F2     | F5     | 0.11375391926        |
| F3     | F5     | 0.11374611144        |
| F4     | F5     | 0.11376285811        |
| Si1    | F6     | 0.19652895354        |
| F2     | F6     | 0.11376822842        |
| F3     | F6     | 0.11376111273        |
| F4     | F6     | 0.11374764672        |
| F5     | F6     | 0.0015818307451      |
| Si1    | F7     | 0.19704919195        |
| F2     | F7     | 0.0015819941682      |
| F3     | F7     | 0.11376314077        |
| F4     | F7     | 0.11375030269        |
| F5     | F7     | 0.11376968912        |
| F6     | F7     | 0.11375411789        |

### CCSD

| Atom A | Atom B | Delocalization index |
|--------|--------|----------------------|
| Si1    | F2     | 0.20499289375        |
| Si1    | F3     | 0.20437414611        |
| F2     | F3     | 0.10988613693        |
| Si1    | F4     | 0.20437479991        |
| F2     | F4     | 0.10989651094        |
| F3     | F4     | 0.0020930273073      |

|     |    |                 |
|-----|----|-----------------|
| Si1 | F5 | 0.20437147152   |
| F2  | F5 | 0.10988877949   |
| F3  | F5 | 0.10988276946   |
| F4  | F5 | 0.10989297635   |
| Si1 | F6 | 0.20437655901   |
| F2  | F6 | 0.10990062407   |
| F3  | F6 | 0.10989427205   |
| F4  | F6 | 0.1098836902    |
| F5  | F6 | 0.0020931797552 |
| Si1 | F7 | 0.20499069731   |
| F2  | F7 | 0.0020934329893 |
| F3  | F7 | 0.1098948503    |
| F4  | F7 | 0.10988591284   |
| F5  | F7 | 0.10989897707   |
| F6  | F7 | 0.10988848463   |

## RENATE (VII) ANION

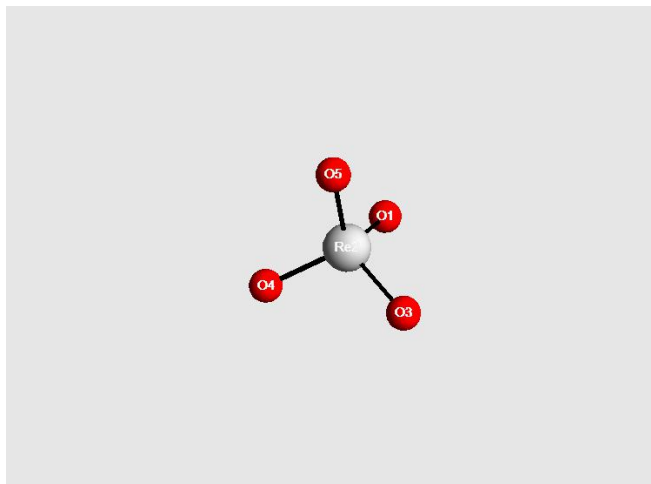

## HARTREE-FOCK

| Atom A | Atom B | Delocalization index |
|--------|--------|----------------------|
| O1     | Re2    | 1.5151975888         |
| O1     | O3     | 0.14476073062        |
| Re2    | O3     | 1.5152956854         |
| O1     | O4     | 0.14476086593        |
| Re2    | O4     | 1.5152667978         |
| O3     | O4     | 0.14476156728        |
| O1     | O5     | 0.14476058396        |
| Re2    | O5     | 1.5152020576         |
| O3     | O5     | 0.14476131749        |
| O4     | O5     | 0.14476119682        |

## BORANE

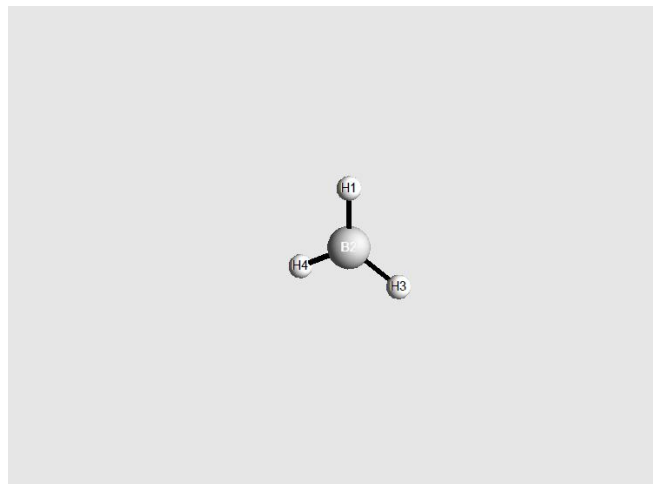

### HARTREE-FOCK

| Atom A | Atom B | Delocalization index |
|--------|--------|----------------------|
| H1     | B2     | 0.50804812759        |
| H1     | H3     | 0.14439027054        |
| B2     | H3     | 0.50806998316        |
| H1     | H4     | 0.14439028027        |
| B2     | H4     | 0.50804105518        |
| H3     | H4     | 0.1443900561         |

### CCSD

| Atom A | Atom B | Delocalization index |
|--------|--------|----------------------|
| H1     | B2     | 0.52168726284        |
| H1     | H3     | 0.11288497929        |
| B2     | H3     | 0.52171319956        |
| H1     | H4     | 0.11288474045        |
| B2     | H4     | 0.52169323635        |
| H3     | H4     | 0.11288499102        |

## DIBORANE

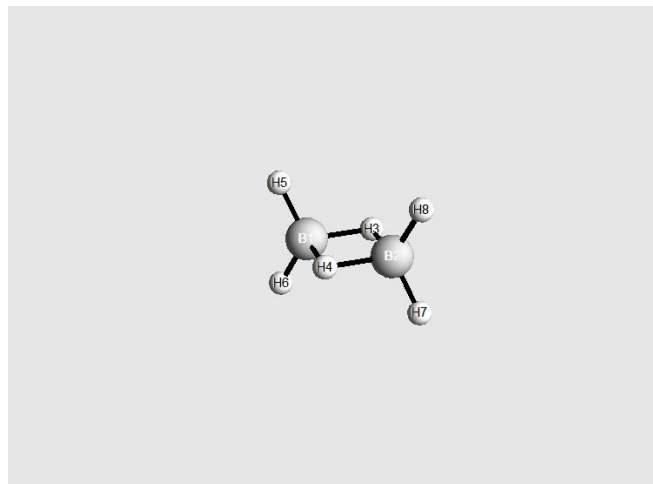

## HARTREE-FOCK

| Atom A | Atom B | Delocalization index |
|--------|--------|----------------------|
| B1     | B2     | 0.05528880321        |
| B1     | H3     | 0.28005992914        |
| B2     | H3     | 0.27988107897        |
| B1     | H4     | 0.27988611353        |
| B2     | H4     | 0.28005704616        |
| H3     | H4     | 0.21826272944        |
| B1     | H5     | 0.49533419712        |
| B2     | H5     | 0.018372317818       |
| H3     | H5     | 0.11091106821        |
| H4     | H5     | 0.11090505309        |
| B1     | H6     | 0.49554541854        |
| B2     | H6     | 0.018359918882       |
| H3     | H6     | 0.11090901814        |
| H4     | H6     | 0.11090268424        |
| H5     | H6     | 0.12548099759        |
| B1     | H7     | 0.018372682826       |
| B2     | H7     | 0.49532418103        |
| H3     | H7     | 0.11090334055        |
| H4     | H7     | 0.1109092025         |
| H5     | H7     | 0.014345358039       |
| H6     | H7     | 0.010660996227       |
| B1     | H8     | 0.018360745308       |
| B2     | H8     | 0.49554279295        |
| H3     | H8     | 0.1109047842         |
| H4     | H8     | 0.1109114073         |
| H5     | H8     | 0.010671409885       |
| H6     | H8     | 0.014345288367       |
| H7     | H8     | 0.12548176762        |

## CCSD

| Atom A | Atom B | Delocalization index |
|--------|--------|----------------------|
| B1     | B2     | 0.059214205647       |
| B1     | H3     | 0.30413168793        |
| B2     | H3     | 0.30402703571        |
| B1     | H4     | 0.30403165076        |
| B2     | H4     | 0.30413198306        |
| H3     | H4     | 0.16706044741        |
| B1     | H5     | 0.51196266052        |
| B2     | H5     | 0.015982436906       |
| H3     | H5     | 0.08830368901        |
| H4     | H5     | 0.088300505912       |
| B1     | H6     | 0.51153095107        |
| B2     | H6     | 0.016020504402       |
| H3     | H6     | 0.088304425448       |
| H4     | H6     | 0.088296737006       |
| H5     | H6     | 0.095146568579       |
| B1     | H7     | 0.015981754035       |
| B2     | H7     | 0.5119596988         |
| H3     | H7     | 0.08829939325        |
| H4     | H7     | 0.088302892391       |
| H5     | H7     | 0.011573327513       |
| H6     | H7     | 0.0094236867201      |
| B1     | H8     | 0.016022316117       |
| B2     | H8     | 0.51152604038        |
| H3     | H8     | 0.088298004173       |
| H4     | H8     | 0.088306121759       |
| H5     | H8     | 0.0094311911289      |
| H6     | H8     | 0.011573324224       |
| H7     | H8     | 0.095147007733       |

## HYDROGEN PEROXIDE

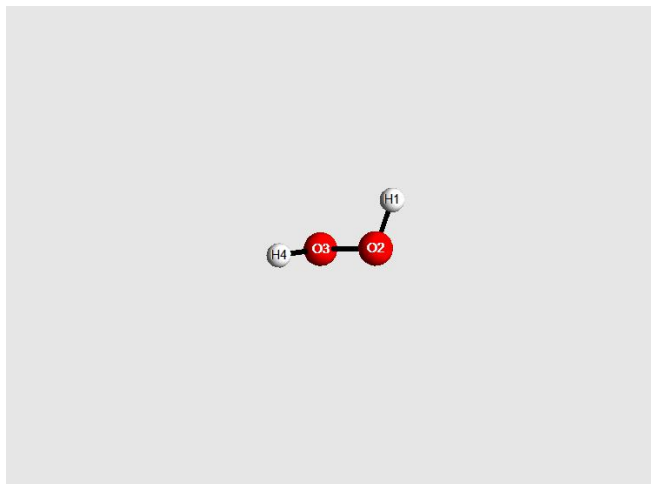

### HARTREE-FOCK

| Atom A | Atom B | Delocalization index |
|--------|--------|----------------------|
| H1     | O2     | 0.5834609473         |
| H1     | O3     | 0.023694352891       |
| O2     | O3     | 1.2976200238         |
| H1     | H4     | 0.00067473192968     |
| O2     | H4     | 0.023694414929       |
| O3     | H4     | 0.58347996818        |

### CCSD

| Atom A | Atom B | Delocalization index |
|--------|--------|----------------------|
| H1     | O2     | 0.58390816007        |
| H1     | O3     | 0.022826427843       |
| O2     | O3     | 0.97176955194        |
| H1     | H4     | 0.00083660925438     |
| O2     | H4     | 0.022824665297       |
| O3     | H4     | 0.58395175273        |

## NITROGEN

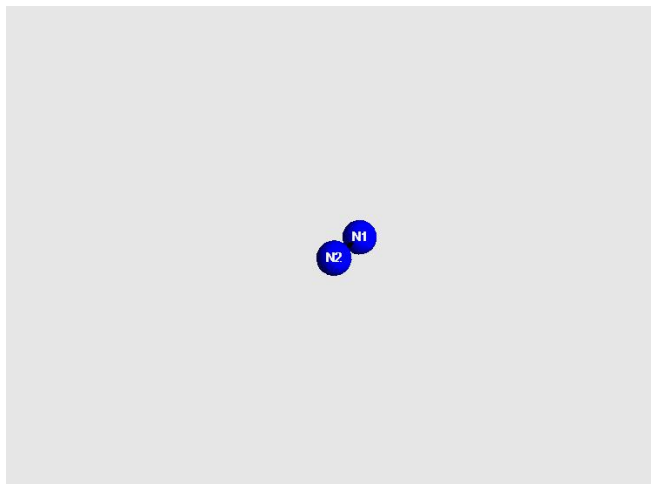

### HARTREE-FOCK

| Atom A | Atom B | Delocalization index |
|--------|--------|----------------------|
| N1     | N2     | 3.0420751562         |

### CCSD

| Atom A | Atom B | Delocalization index |
|--------|--------|----------------------|
| N1     | N2     | 2.3098417756         |



## AZIDE ANION

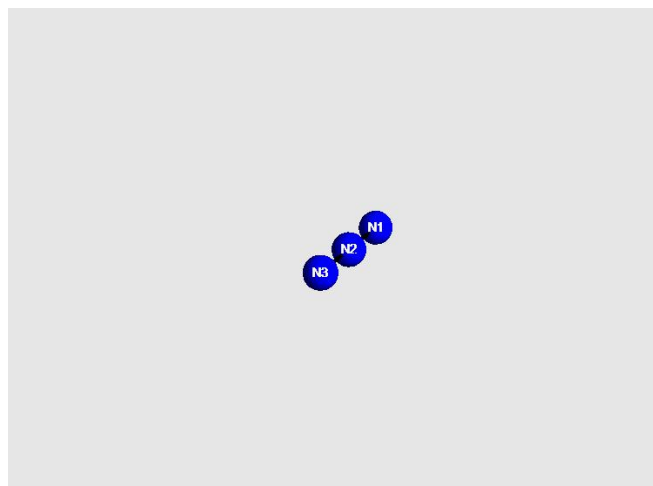

### HARTREE-FOCK

| Atom A | Atom B | Delocalization index |
|--------|--------|----------------------|
| N1     | N2     | 2.1881437324         |
| N1     | N3     | 0.58520691369        |
| N2     | N3     | 2.1881345484         |

### CCSD

| Atom A | Atom B | Delocalization index |
|--------|--------|----------------------|
| N1     | N2     | 2.1881439613         |
| N1     | N3     | 0.58520689603        |
| N2     | N3     | 2.1881347747         |

## HYDROGEN

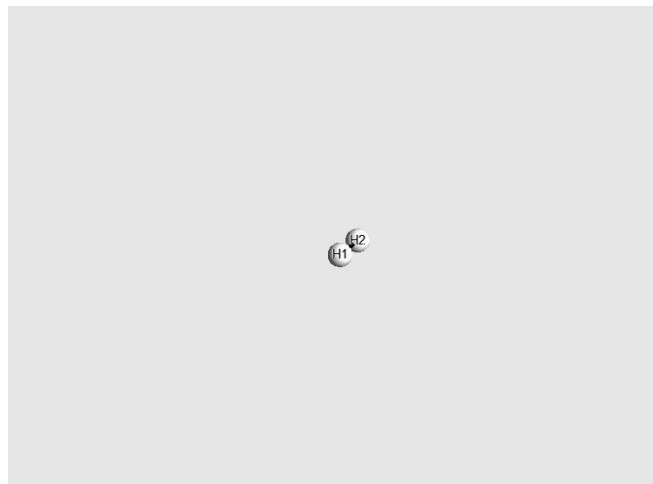

### HARTREE-FOCK

| Atom A | Atom B | Delocalization index |
|--------|--------|----------------------|
| H1     | H2     | 1.0000008336         |

### CCSD

| Atom A | Atom B | Delocalization index |
|--------|--------|----------------------|
| H1     | H2     | 0.843945036          |

## AMMONIA

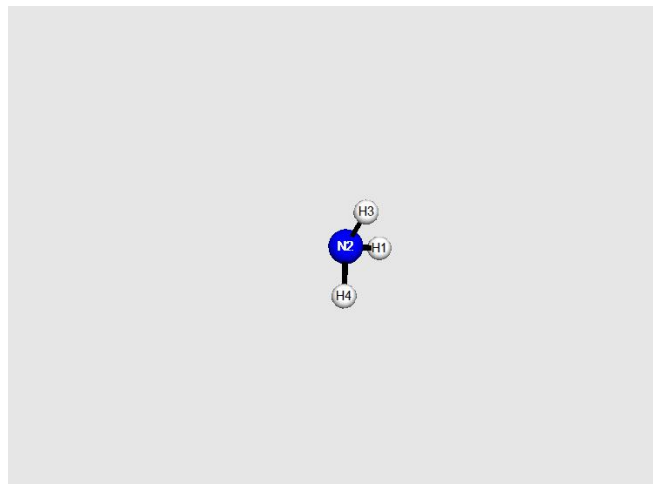

### HARTREE-FOCK

| Atom A | Atom B | Delocalization index |
|--------|--------|----------------------|
| H1     | N2     | 0.89424468702        |
| H1     | H3     | 0.01857310355        |
| N2     | H3     | 0.8942575027         |
| H1     | H4     | 0.018573396162       |
| N2     | H4     | 0.89425214267        |
| H3     | H4     | 0.018574786535       |

### CCSD

| Atom A | Atom B | Delocalization index |
|--------|--------|----------------------|
| H1     | N2     | 0.79196793572        |
| H1     | H3     | 0.018159647432       |
| N2     | H3     | 0.79196449804        |
| H1     | H4     | 0.01816000339        |
| N2     | H4     | 0.79196794872        |
| H3     | H4     | 0.018159926496       |

# NITRODERIVATIVES

## NITROPROPANE

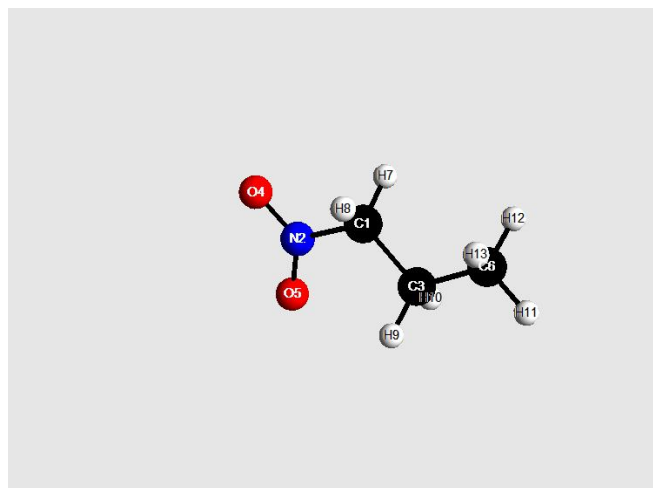

### HARTREE-FOCK

| Atom A | Atom B | Delocalization index |
|--------|--------|----------------------|
| C1     | N2     | 0.74736870786        |
| C1     | C3     | 0.95736654352        |
| N2     | C3     | 0.042770558243       |
| C1     | O4     | 0.080528103717       |
| N2     | O4     | 1.6845890987         |
| C3     | O4     | 0.011519477892       |
| C1     | O5     | 0.067194896653       |
| N2     | O5     | 1.699928815          |
| C3     | O5     | 0.036058951085       |
| O4     | O5     | 0.32975115296        |
| C1     | C6     | 0.051607073252       |
| N2     | C6     | 0.0088352531091      |
| C3     | C6     | 0.97653015568        |
| O4     | C6     | 0.0020863597866      |
| O5     | C6     | 0.0041478206131      |
| C1     | H7     | 0.91640321503        |
| N2     | H7     | 0.058270654776       |
| C3     | H7     | 0.031144465785       |
| O4     | H7     | 0.018974610908       |
| O5     | H7     | 0.011943423946       |
| C6     | H7     | 0.006741505594       |
| C1     | H8     | 0.9162954596         |
| N2     | H8     | 0.058377798864       |
| C3     | H8     | 0.031152040741       |
| O4     | H8     | 0.018870430106       |
| O5     | H8     | 0.011942709122       |
| C6     | H8     | 0.0067301460789      |
| H7     | H8     | 0.032865923716       |

|     |     |                  |
|-----|-----|------------------|
| C1  | H9  | 0.043841734735   |
| N2  | H9  | 0.003888030791   |
| C3  | H9  | 0.9426132808     |
| O4  | H9  | 0.0012872663758  |
| O5  | H9  | 0.016310237884   |
| C6  | H9  | 0.039149008155   |
| H7  | H9  | 0.0095932928728  |
| H8  | H9  | 0.0032144850706  |
| C1  | C1  | 0.043877498795   |
| N2  | C1  | 0.0039152218613  |
| C3  | C1  | 0.94276529085    |
| O4  | C1  | 0.0012867044363  |
| O5  | C1  | 0.016165824895   |
| C6  | C1  | 0.039163767161   |
| H7  | C1  | 0.0032073489526  |
| H8  | C1  | 0.0095991094223  |
| H9  | C1  | 0.038507684241   |
| C1  | H11 | 0.010434019203   |
| N2  | H11 | 0.0019165477959  |
| C3  | H11 | 0.042219759042   |
| O4  | H11 | 0.00067948361991 |
| O5  | H11 | 0.00021552816933 |
| C6  | H11 | 0.9641455172     |
| H7  | H11 | 0.00073993856699 |
| H8  | H11 | 0.0007390639373  |
| H9  | H11 | 0.0036401079767  |
| C1  | H11 | 0.0036402742349  |
| C1  | H12 | 0.0074747550717  |
| N2  | H12 | 0.00059873855424 |
| C3  | H12 | 0.042374609056   |
| O4  | H12 | 0.00015745310361 |
| O5  | H12 | 0.00063005207939 |
| C6  | H12 | 0.96355096396    |
| H7  | H12 | 0.0054874487507  |
| H8  | H12 | 0.00044809657646 |
| H9  | H12 | 0.010835369672   |
| C1  | H12 | 0.0034001603952  |
| H11 | H12 | 0.042754315632   |
| C1  | H13 | 0.0074699387868  |
| N2  | H13 | 0.0005998028996  |
| C3  | H13 | 0.042363798411   |
| O4  | H13 | 0.00015829146807 |
| O5  | H13 | 0.00062700048792 |
| C6  | H13 | 0.96355370442    |
| H7  | H13 | 0.00044835390718 |
| H8  | H13 | 0.0054823201458  |
| H9  | H13 | 0.0033985472411  |
| C1  | H13 | 0.010840387346   |

|     |     |                |
|-----|-----|----------------|
| H11 | H13 | 0.042754930272 |
| H12 | H13 | 0.043878620074 |

## NITROMETHANE

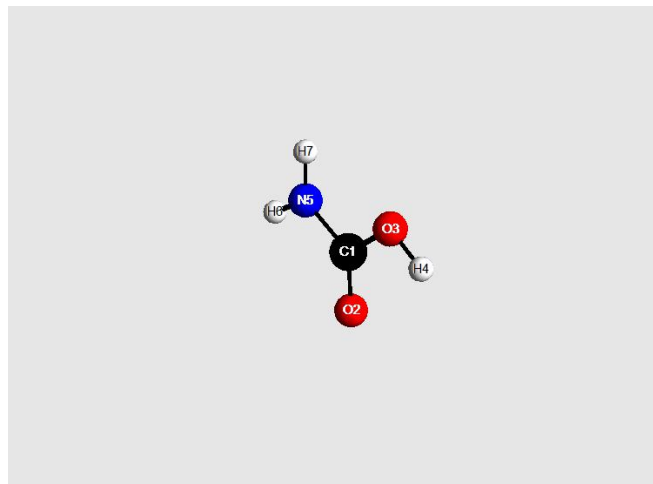

## HARTREE-FOCK

| Atom A | Atom B | Delocalization index |
|--------|--------|----------------------|
| C1     | O2     | 0.97062038722        |
| C1     | O3     | 0.64178217106        |
| O2     | O3     | 0.26858196811        |
| C1     | H4     | 0.0056886771034      |
| O2     | H4     | 0.0095763052142      |
| O3     | H4     | 0.53542061767        |
| C1     | N5     | 0.82899265525        |
| O2     | N5     | 0.24333183968        |
| O3     | N5     | 0.19174531656        |
| H4     | N5     | 0.0073468308687      |
| C1     | H6     | 0.012189387392       |
| O2     | H6     | 0.0081912664127      |
| O3     | H6     | 0.0093912161454      |
| H4     | H6     | 0.00096484883889     |
| N5     | H6     | 0.78762621503        |
| C1     | H7     | 0.012215541393       |
| O2     | H7     | 0.01321507604        |
| O3     | H7     | 0.008082704813       |
| H4     | H7     | 0.00020051892252     |
| N5     | H7     | 0.79195726086        |
| H6     | H7     | 0.014028019983       |

## NITROETHANE

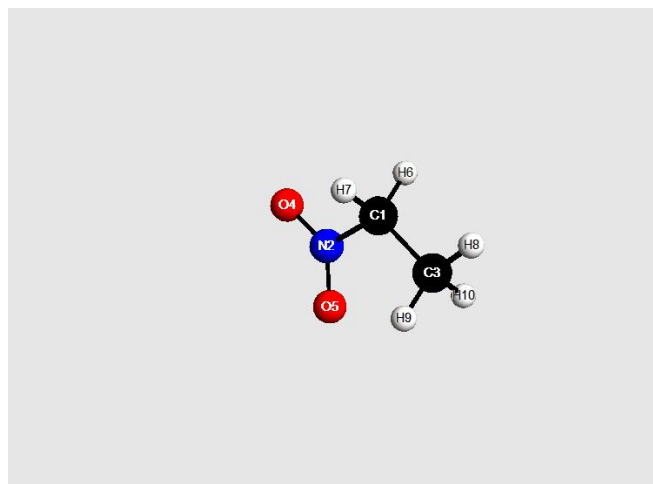

### HARTREE-FOCK

| Atom A | Atom B | Delocalization index |
|--------|--------|----------------------|
| C1     | N2     | 0.74808305772        |
| C1     | C3     | 0.97400227438        |
| N2     | C3     | 0.044793942774       |
| C1     | O4     | 0.080688015783       |
| N2     | O4     | 1.6856259174         |
| C3     | O4     | 0.011977923085       |
| C1     | O5     | 0.068225924085       |
| N2     | O5     | 1.7002884999         |
| C3     | O5     | 0.039006406417       |
| O4     | O5     | 0.32961165902        |
| C1     | H6     | 0.91991713248        |
| N2     | H6     | 0.058168912905       |
| C3     | H6     | 0.032835496477       |
| O4     | H6     | 0.018881033895       |
| O5     | H6     | 0.012175039134       |
| C1     | H7     | 0.91989047925        |
| N2     | H7     | 0.058304288475       |
| C3     | H7     | 0.032847148344       |
| O4     | H7     | 0.018749781334       |
| O5     | H7     | 0.012171940265       |
| H6     | H7     | 0.032645998222       |
| C1     | H8     | 0.049221285538       |
| N2     | H8     | 0.0096964233592      |
| C3     | H8     | 0.96118221071        |
| O4     | H8     | 0.0024015333056      |
| O5     | H8     | 0.0046853577528      |
| H6     | H8     | 0.0031516403793      |
| H7     | H8     | 0.0031459679463      |
| C1     | H9     | 0.043308902746       |
| N2     | H9     | 0.0038440583987      |



|    |    |                 |
|----|----|-----------------|
| C3 | H9 | 0.95542936581   |
| O4 | H9 | 0.0013464564049 |
| O5 | H9 | 0.014512180545  |
| H6 | H9 | 0.0098891485575 |
| H7 | H9 | 0.003200263934  |
| H8 | H9 | 0.039260360372  |
| C1 | C1 | 0.043348342047  |
| N2 | C1 | 0.0038670066419 |
| C3 | C1 | 0.95549172934   |
| O4 | C1 | 0.0013466063468 |
| O5 | C1 | 0.01435632481   |
| H6 | C1 | 0.00319142299   |
| H7 | C1 | 0.0098965993324 |
| H8 | C1 | 0.039281826152  |
| H9 | C1 | 0.038552809505  |

# NITROGENATED BASES

## CYTOSINE

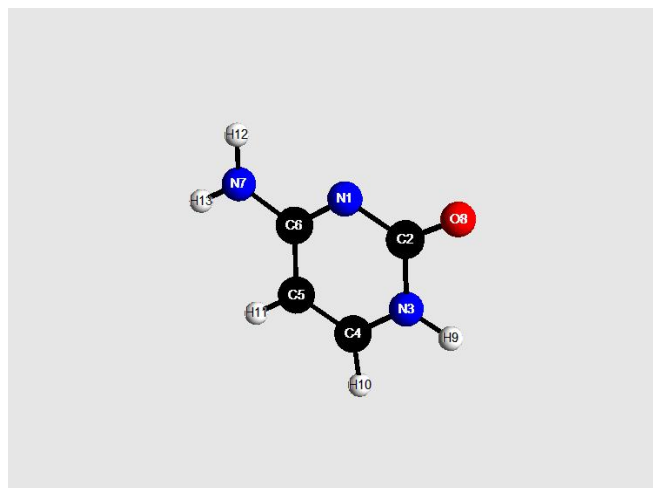

### HARTREE-FOCK

| Atom A | Atom B | Delocalization index |
|--------|--------|----------------------|
| N1     | C2     | 0.96570426025        |
| N1     | N3     | 0.14105348276        |
| C2     | N3     | 0.75483307606        |
| N1     | C4     | 0.051191999555       |
| C2     | C4     | 0.016105135437       |
| N3     | C4     | 1.0353814647         |
| N1     | C5     | 0.089199680116       |
| C2     | C5     | 0.017404935024       |
| N3     | C5     | 0.14570810564        |
| C4     | C5     | 1.5544128854         |
| N1     | C6     | 1.2294489251         |
| C2     | C6     | 0.026253882909       |
| N3     | C6     | 0.037103487504       |
| C4     | C6     | 0.082021060966       |
| C5     | C6     | 1.057854619          |
| N1     | N7     | 0.21600201178        |
| C2     | N7     | 0.014053512696       |
| N3     | N7     | 0.01384902529        |
| C4     | N7     | 0.021740693426       |
| C5     | N7     | 0.093958326765       |
| C6     | N7     | 0.9522199355         |
| N1     | O8     | 0.21037404552        |
| C2     | O8     | 1.0321558675         |
| N3     | O8     | 0.23985880506        |
| C4     | O8     | 0.013205984575       |
| C5     | O8     | 0.01798216259        |
| C6     | O8     | 0.02090242204        |
| N7     | O8     | 0.0084664434031      |

|     |     |                  |
|-----|-----|------------------|
| N1  | H9  | 0.0089044177596  |
| C2  | H9  | 0.011187152526   |
| N3  | H9  | 0.77170647668    |
| C4  | H9  | 0.015872769084   |
| C5  | H9  | 0.0066344378875  |
| C6  | H9  | 0.0010683389632  |
| N7  | H9  | 0.00057626063779 |
| O8  | H9  | 0.012060749571   |
| N1  | N1  | 0.0031282651858  |
| C2  | N1  | 0.0049821547291  |
| N3  | N1  | 0.066899331395   |
| C4  | N1  | 0.93601655074    |
| C5  | N1  | 0.046916386745   |
| C6  | N1  | 0.0084410914901  |
| N7  | N1  | 0.0019281965416  |
| O8  | N1  | 0.002624316566   |
| H9  | N1  | 0.0028920005931  |
| N1  | H11 | 0.011457142409   |
| C2  | H11 | 0.0011766569162  |
| N3  | H11 | 0.01403745322    |
| C4  | H11 | 0.058242804045   |
| C5  | H11 | 0.97852499027    |
| C6  | H11 | 0.035486564523   |
| N7  | H11 | 0.011367426945   |
| O8  | H11 | 0.0018447854426  |
| H9  | H11 | 0.00097768080379 |
| N1  | H11 | 0.005229350148   |
| N1  | H12 | 0.013755641023   |
| C2  | H12 | 0.00036216882367 |
| N3  | H12 | 0.00054742192557 |
| C4  | H12 | 0.0014637341336  |
| C5  | H12 | 0.0070282099937  |
| C6  | H12 | 0.014919739555   |
| N7  | H12 | 0.7798135515     |
| O8  | H12 | 0.00019042061303 |
| H9  | H12 | 4.2599393995e-05 |
| N1  | H12 | 0.00027529963088 |
| H11 | H12 | 0.00041048564634 |
| N1  | H13 | 0.010565677294   |
| C2  | H13 | 0.0013237435051  |
| N3  | H13 | 0.00044753816563 |
| C4  | H13 | 0.00050900568628 |
| C5  | H13 | 0.0051115891558  |
| C6  | H13 | 0.01497065877    |
| N7  | H13 | 0.81148879345    |
| O8  | H13 | 0.00061209415583 |
| H9  | H13 | 4.6156944876e-05 |
| N1  | H13 | 2.7052510109e-05 |

|     |     |                |
|-----|-----|----------------|
| H11 | H13 | 0.003519596587 |
| H12 | H13 | 0.014575042187 |

### CCSD

| Atom A | Atom B | Delocalization index |
|--------|--------|----------------------|
| N1     | C2     | 1.0008027666         |
| N1     | N3     | 0.13316807172        |
| C2     | N3     | 0.78252446198        |
| N1     | C4     | 0.051303595085       |
| C2     | C4     | 0.017391637991       |
| N3     | C4     | 1.0418246306         |
| N1     | C5     | 0.084728963937       |
| C2     | C5     | 0.018188865135       |
| N3     | C5     | 0.14301296949        |
| C4     | C5     | 1.5539933319         |
| N1     | C6     | 1.2704176603         |
| C2     | C6     | 0.030075046264       |
| N3     | C6     | 0.037454686835       |
| C4     | C6     | 0.082255193163       |
| C5     | C6     | 1.0696989147         |
| N1     | N7     | 0.2031737486         |
| C2     | N7     | 0.014738188838       |
| N3     | N7     | 0.013520341837       |
| C4     | N7     | 0.021804688904       |
| C5     | N7     | 0.092018118186       |
| C6     | N7     | 0.97325523383        |
| N1     | O8     | 0.19741763832        |
| C2     | O8     | 1.0622998641         |
| N3     | O8     | 0.22702149784        |
| C4     | O8     | 0.013289462216       |
| C5     | O8     | 0.017528013733       |
| C6     | O8     | 0.021544622108       |
| N7     | O8     | 0.0080804630457      |
| N1     | H9     | 0.0089747403977      |
| C2     | H9     | 0.011984578488       |
| N3     | H9     | 0.77206779643        |
| C4     | H9     | 0.016404396045       |
| C5     | H9     | 0.0066995732704      |
| C6     | H9     | 0.0010906897758      |
| N7     | H9     | 0.00056432476015     |
| O8     | H9     | 0.011746353754       |
| N1     | N1     | 0.0030498862239      |
| C2     | N1     | 0.0051434412447      |
| N3     | N1     | 0.063898686756       |
| C4     | N1     | 0.93571326029        |
| C5     | N1     | 0.046315553778       |
| C6     | N1     | 0.008220567001       |
| N7     | N1     | 0.0018865393001      |

|     |     |                  |
|-----|-----|------------------|
| O8  | N1  | 0.0025496138684  |
| H9  | N1  | 0.0026916340541  |
| N1  | H11 | 0.011284131893   |
| C2  | H11 | 0.0012076224547  |
| N3  | H11 | 0.013705864709   |
| C4  | H11 | 0.057015600871   |
| C5  | H11 | 0.97663035644    |
| C6  | H11 | 0.035579449945   |
| N7  | H11 | 0.011131090806   |
| O8  | H11 | 0.00175500575    |
| H9  | H11 | 0.0010010848151  |
| N1  | H11 | 0.0047854638107  |
| N1  | H12 | 0.013445897774   |
| C2  | H12 | 0.00039198823612 |
| N3  | H12 | 0.00053372036928 |
| C4  | H12 | 0.0014805809072  |
| C5  | H12 | 0.0069868171472  |
| C6  | H12 | 0.015647087473   |
| N7  | H12 | 0.7794100039     |
| O8  | H12 | 0.00017670524268 |
| H9  | H12 | 4.3037186871e-05 |
| N1  | H12 | 0.00026949550081 |
| H11 | H12 | 0.00041334435218 |
| N1  | H13 | 0.010341583601   |
| C2  | H13 | 0.0014370712905  |
| N3  | H13 | 0.00044149097607 |
| C4  | H13 | 0.00050367294407 |
| C5  | H13 | 0.0050470625059  |
| C6  | H13 | 0.015801381899   |
| N7  | H13 | 0.81111585814    |
| O8  | H13 | 0.0006182939659  |
| H9  | H13 | 4.6937807713e-05 |
| N1  | H13 | 2.3769798922e-05 |
| H11 | H13 | 0.0035115222301  |
| H12 | H13 | 0.015006732805   |

## THYMINE

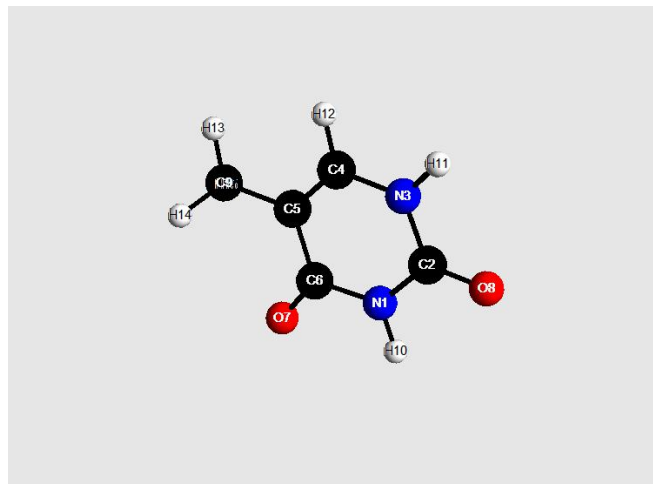

### HARTREE-FOCK

| Atom A | Atom B | Delocalization index |
|--------|--------|----------------------|
| N1     | C2     | 0.81726832551        |
| N1     | N3     | 0.14676354882        |
| C2     | N3     | 0.80807014816        |
| N1     | C4     | 0.029716392385       |
| C2     | C4     | 0.015295471505       |
| N3     | C4     | 0.9693822674         |
| N1     | C5     | 0.079867264607       |
| C2     | C5     | 0.012176735781       |
| N3     | C5     | 0.13175093146        |
| C4     | C5     | 1.6245061743         |
| N1     | C6     | 0.81996327283        |
| C2     | C6     | 0.01069156224        |
| N3     | C6     | 0.022037478337       |
| C4     | C6     | 0.084113720798       |
| C5     | C6     | 0.97056816843        |
| N1     | O7     | 0.24707456506        |
| C2     | O7     | 0.010657149609       |
| N3     | O7     | 0.014325107089       |
| C4     | O7     | 0.037519277864       |
| C5     | O7     | 0.11184450639        |
| C6     | O7     | 1.1218955293         |
| N1     | O8     | 0.22920970341        |
| C2     | O8     | 1.0228914244         |
| N3     | O8     | 0.23126519121        |
| C4     | O8     | 0.01250002233        |
| C5     | O8     | 0.013471448012       |
| C6     | O8     | 0.010238494216       |
| O7     | O8     | 0.0073979742788      |
| N1     | C9     | 0.0071757825849      |
| C2     | C9     | 0.0006495919909      |

|     |     |                  |
|-----|-----|------------------|
| N3  | C9  | 0.011573804383   |
| C4  | C9  | 0.058653911232   |
| C5  | C9  | 0.99999951978    |
| C6  | C9  | 0.030869329443   |
| O7  | C9  | 0.027768375267   |
| O8  | C9  | 0.00093038725515 |
| N1  | N1  | 0.75215049707    |
| C2  | N1  | 0.011047418531   |
| N3  | N1  | 0.0073090529336  |
| C4  | N1  | 0.00067826073116 |
| C5  | N1  | 0.0056647289426  |
| C6  | N1  | 0.012146430396   |
| O7  | N1  | 0.01092304463    |
| O8  | N1  | 0.0098086773502  |
| C9  | N1  | 0.00089601318623 |
| N1  | H11 | 0.0076087598667  |
| C2  | H11 | 0.011702902565   |
| N3  | H11 | 0.76776477485    |
| C4  | H11 | 0.014892086314   |
| C5  | H11 | 0.0058338543775  |
| C6  | H11 | 0.00053701265318 |
| O7  | H11 | 0.00051196546302 |
| O8  | H11 | 0.010336468692   |
| C9  | H11 | 0.00084270788054 |
| N1  | H11 | 0.00083992446494 |
| N1  | H12 | 0.0015556604805  |
| C2  | H12 | 0.0047867161994  |
| N3  | H12 | 0.064109263745   |
| C4  | H12 | 0.93555692222    |
| C5  | H12 | 0.047898432187   |
| C6  | H12 | 0.0088117961874  |
| O7  | H12 | 0.0034198116906  |
| O8  | H12 | 0.0021288290439  |
| C9  | H12 | 0.0094041588293  |
| N1  | H12 | 9.9312156868e-05 |
| H11 | H12 | 0.0025809379719  |
| N1  | H13 | 0.0014530667613  |
| C2  | H13 | 0.00011087628715 |
| N3  | H13 | 0.00095878757713 |
| C4  | H13 | 0.01199998379    |
| C5  | H13 | 0.046422390371   |
| C6  | H13 | 0.0072970543307  |
| O7  | H13 | 0.0033003449378  |
| O8  | H13 | 0.00012507975791 |
| C9  | H13 | 0.96113916096    |
| N1  | H13 | 0.00025143767689 |
| H11 | H13 | 3.8035575959e-05 |
| H12 | H13 | 0.0077182778212  |

|     |     |                  |
|-----|-----|------------------|
| N1  | H14 | 0.00065669754279 |
| C2  | H14 | 0.00040329456418 |
| N3  | H14 | 0.0033980143407  |
| C4  | H14 | 0.014926228236   |
| C5  | H14 | 0.045319938675   |
| C6  | H14 | 0.003206759966   |
| O7  | H14 | 0.010556872895   |
| O8  | H14 | 0.00058679620944 |
| C9  | H14 | 0.95103741247    |
| N1  | H14 | 2.5195974925e-05 |
| H11 | H14 | 0.00013789355553 |
| H12 | H14 | 0.00091190199529 |
| H13 | H14 | 0.039773049492   |
| N1  | H15 | 0.00065675274374 |
| C2  | H15 | 0.00040318497224 |
| N3  | H15 | 0.0033974556265  |
| C4  | H15 | 0.014924196759   |
| C5  | H15 | 0.045296004038   |
| C6  | H15 | 0.0032082159782  |
| O7  | H15 | 0.010562606996   |
| O8  | H15 | 0.00058667189579 |
| C9  | H15 | 0.95104485095    |
| N1  | H15 | 2.5200887764e-05 |
| H11 | H15 | 0.00013788282896 |
| H12 | H15 | 0.00091196141991 |
| H13 | H15 | 0.039772394411   |
| H14 | H15 | 0.039353428398   |

#### CCSD

| Atom A | Atom B | Delocalization index |
|--------|--------|----------------------|
| N1     | C2     | 0.85147804677        |
| N1     | N3     | 0.13919743775        |
| C2     | N3     | 0.84095597307        |
| N1     | C4     | 0.029877604428       |
| C2     | C4     | 0.016647195952       |
| N3     | C4     | 0.97433508298        |
| N1     | C5     | 0.079040861451       |
| C2     | C5     | 0.013170444771       |
| N3     | C5     | 0.13011991349        |
| C4     | C5     | 1.6179946994         |
| N1     | C6     | 0.83971867131        |
| C2     | C6     | 0.01209910847        |
| N3     | C6     | 0.022205258621       |
| C4     | C6     | 0.084503237086       |
| C5     | C6     | 0.98243008886        |
| N1     | O7     | 0.23332570614        |
| C2     | O7     | 0.011232490942       |
| N3     | O7     | 0.014453411263       |



|     |     |                  |
|-----|-----|------------------|
| C4  | 07  | 0.038134759735   |
| C5  | 07  | 0.10818567017    |
| C6  | 07  | 1.1424031174     |
| N1  | 08  | 0.2150795641     |
| C2  | 08  | 1.057496694      |
| N3  | 08  | 0.21793416134    |
| C4  | 08  | 0.012454970977   |
| C5  | 08  | 0.013415264533   |
| C6  | 08  | 0.010510762803   |
| 07  | 08  | 0.0070174511713  |
| N1  | C9  | 0.0072503075071  |
| C2  | C9  | 0.00069966439368 |
| N3  | C9  | 0.011364401504   |
| C4  | C9  | 0.058013082732   |
| C5  | C9  | 1.0023602693     |
| C6  | C9  | 0.031681539304   |
| 07  | C9  | 0.027988786249   |
| 08  | C9  | 0.00092047227944 |
| N1  | N1  | 0.75270920273    |
| C2  | N1  | 0.01200486419    |
| N3  | N1  | 0.0073149984168  |
| C4  | N1  | 0.00068190574099 |
| C5  | N1  | 0.0056869498226  |
| C6  | N1  | 0.012796518606   |
| 07  | N1  | 0.010536196029   |
| 08  | N1  | 0.0094957916486  |
| C9  | N1  | 0.0009217130553  |
| N1  | H11 | 0.0076274918558  |
| C2  | H11 | 0.012605173775   |
| N3  | H11 | 0.76760861682    |
| C4  | H11 | 0.015312434622   |
| C5  | H11 | 0.0059646027874  |
| C6  | H11 | 0.00053666098237 |
| 07  | H11 | 0.0005113423202  |
| 08  | H11 | 0.010001899007   |
| C9  | H11 | 0.00086151194566 |
| N1  | H11 | 0.00086543078562 |
| N1  | H12 | 0.001525423061   |
| C2  | H12 | 0.0050490119105  |
| N3  | H12 | 0.061693937439   |
| C4  | H12 | 0.93422718925    |
| C5  | H12 | 0.047307025609   |
| C6  | H12 | 0.0085556707983  |
| 07  | H12 | 0.0033257751786  |
| 08  | H12 | 0.0020997483151  |
| C9  | H12 | 0.0089243976943  |
| N1  | H12 | 9.4049633244e-05 |
| H11 | H12 | 0.0024318692592  |

|     |     |                  |
|-----|-----|------------------|
| N1  | H13 | 0.0014598129245  |
| C2  | H13 | 0.00011571246895 |
| N3  | H13 | 0.00094910542243 |
| C4  | H13 | 0.012000816008   |
| C5  | H13 | 0.046313264378   |
| C6  | H13 | 0.0073960862479  |
| O7  | H13 | 0.0032928096141  |
| O8  | H13 | 0.00012446423387 |
| C9  | H13 | 0.96085854243    |
| N1  | H13 | 0.0002555841547  |
| H11 | H13 | 3.8509042031e-05 |
| H12 | H13 | 0.0075706328356  |
| N1  | H14 | 0.00065399758087 |
| C2  | H14 | 0.00044431838419 |
| N3  | H14 | 0.0033773341011  |
| C4  | H14 | 0.015089359297   |
| C5  | H14 | 0.045277022451   |
| C6  | H14 | 0.0033502954769  |
| O7  | H14 | 0.010884528387   |
| O8  | H14 | 0.00058766936652 |
| C9  | H14 | 0.94974369761    |
| N1  | H14 | 2.5286362699e-05 |
| H11 | H14 | 0.00014114902045 |
| H12 | H14 | 0.00088312581777 |
| H13 | H14 | 0.038953607984   |
| N1  | H15 | 0.00065404707511 |
| C2  | H15 | 0.00044430319476 |
| N3  | H15 | 0.0033771038372  |
| C4  | H15 | 0.015088180052   |
| C5  | H15 | 0.045258467391   |
| C6  | H15 | 0.0033544938354  |
| O7  | H15 | 0.010886592403   |
| O8  | H15 | 0.00058760451919 |
| C9  | H15 | 0.94976864323    |
| N1  | H15 | 2.5288414896e-05 |
| H11 | H15 | 0.00014116598081 |
| H12 | H15 | 0.00088311834856 |
| H13 | H15 | 0.03895346755    |
| H14 | H15 | 0.038648927442   |

## URACIL

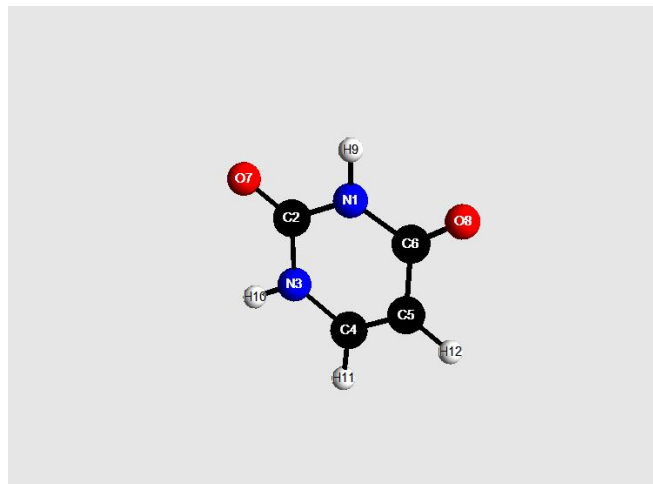

## HARTREE-FOCK

| Atom A | Atom B | Delocalization index |
|--------|--------|----------------------|
| N1     | C2     | 0.82638499652        |
| N1     | N3     | 0.14307188368        |
| C2     | N3     | 0.80181342825        |
| N1     | C4     | 0.029149441253       |
| C2     | C4     | 0.015096258328       |
| N3     | C4     | 0.98044089154        |
| N1     | C5     | 0.08333015319        |
| C2     | C5     | 0.012470282647       |
| N3     | C5     | 0.13855301319        |
| C4     | C5     | 1.6355187097         |
| N1     | C6     | 0.81427380007        |
| C2     | C6     | 0.010843308887       |
| N3     | C6     | 0.021533657291       |
| C4     | C6     | 0.0811471973         |
| C5     | C6     | 0.98558047976        |
| N1     | O7     | 0.2300873633         |
| C2     | O7     | 1.028187038          |
| N3     | O7     | 0.22965059431        |
| C4     | O7     | 0.01253768938        |
| C5     | O7     | 0.014256268051       |
| C6     | O7     | 0.010388524562       |
| N1     | O8     | 0.24585111164        |
| C2     | O8     | 0.010872807347       |
| N3     | O8     | 0.014951482481       |
| C4     | O8     | 0.039773638493       |
| C5     | O8     | 0.12023381134        |
| C6     | O8     | 1.1271486889         |
| O7     | O8     | 0.0075635981198      |
| N1     | H9     | 0.75123563532        |
| C2     | H9     | 0.011202051924       |

|     |     |                  |
|-----|-----|------------------|
| N3  | H9  | 0.0072825858194  |
| C4  | H9  | 0.0006950376416  |
| C5  | H9  | 0.0057376039172  |
| C6  | H9  | 0.012063204325   |
| O7  | H9  | 0.0097956855564  |
| O8  | H9  | 0.010782275281   |
| N1  | N1  | 0.0074048409013  |
| C2  | N1  | 0.011638180288   |
| N3  | N1  | 0.76465501838    |
| C4  | N1  | 0.015008488946   |
| C5  | N1  | 0.0060267402243  |
| C6  | N1  | 0.00052923084858 |
| O7  | N1  | 0.01027412717    |
| O8  | N1  | 0.00052788869036 |
| H9  | N1  | 0.00080908031598 |
| N1  | H11 | 0.0015403517262  |
| C2  | H11 | 0.0048649979986  |
| N3  | H11 | 0.064063884195   |
| C4  | H11 | 0.93786048607    |
| C5  | H11 | 0.048101585244   |
| C6  | H11 | 0.0086812139052  |
| O7  | H11 | 0.002206995556   |
| O8  | H11 | 0.0032995076696  |
| H9  | H11 | 0.00010048706987 |
| N1  | H11 | 0.002560697322   |
| N1  | H12 | 0.008270463479   |
| C2  | H12 | 0.00064442476531 |
| N3  | H12 | 0.013273850276   |
| C4  | H12 | 0.058597298162   |
| C5  | H12 | 0.96416846639    |
| C6  | H12 | 0.031027434762   |
| O7  | H12 | 0.0011635267109  |
| O8  | H12 | 0.012232515532   |
| H9  | H12 | 0.0010466567143  |
| N1  | H12 | 0.00096234397421 |
| H11 | H12 | 0.0055362727811  |

## GUANINE

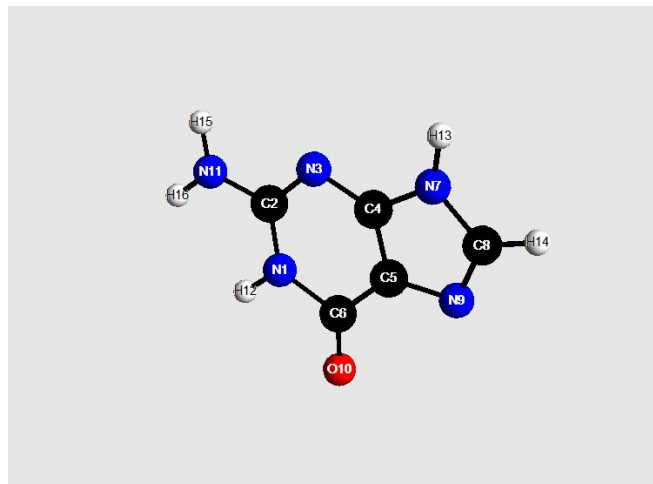

### HARTREE-FOCK

| Atom A | Atom B | Delocalization index |
|--------|--------|----------------------|
| N1     | C2     | 0.90697433378        |
| N1     | N3     | 0.1646387894         |
| C2     | N3     | 1.2073730929         |
| N1     | C4     | 0.035921323767       |
| C2     | C4     | 0.029073975296       |
| N3     | C4     | 1.0736080332         |
| N1     | C5     | 0.092774740967       |
| C2     | C5     | 0.027492985425       |
| N3     | C5     | 0.083422818517       |
| C4     | C5     | 1.2830156518         |
| N1     | C6     | 0.77473826942        |
| C2     | C6     | 0.01303353284        |
| N3     | C6     | 0.021312918469       |
| C4     | C6     | 0.072647446588       |
| C5     | C6     | 1.0266749128         |
| N1     | N7     | 0.007659020322       |
| C2     | N7     | 0.012542206478       |
| N3     | N7     | 0.12417580462        |
| C4     | N7     | 0.96103920745        |
| C5     | N7     | 0.13499852825        |
| C6     | N7     | 0.014771998414       |
| N1     | C8     | 0.0041663650212      |
| C2     | C8     | 0.0060441711066      |
| N3     | C8     | 0.011420376855       |
| C4     | C8     | 0.056739688864       |
| C5     | C8     | 0.064286931835       |
| C6     | C8     | 0.016230071914       |
| N7     | C8     | 0.91963182752        |
| N1     | N9     | 0.012323623676       |
| C2     | N9     | 0.0052159980864      |

|     |     |                  |
|-----|-----|------------------|
| N3  | N9  | 0.019666138078   |
| C4  | N9  | 0.11064527635    |
| C5  | N9  | 1.1059730104     |
| C6  | N9  | 0.051640599495   |
| N7  | N9  | 0.24119898609    |
| C8  | N9  | 1.3784626556     |
| N1  | N1  | 0.23747130099    |
| C2  | N1  | 0.01058478749    |
| N3  | N1  | 0.017507104351   |
| C4  | N1  | 0.029798086632   |
| C5  | N1  | 0.11142210733    |
| C6  | N1  | 1.1176238489     |
| N7  | N1  | 0.0079059443806  |
| C8  | N1  | 0.0078627799851  |
| N9  | N1  | 0.022216022958   |
| N1  | N11 | 0.16354321858    |
| C2  | N11 | 0.91071425229    |
| N3  | N11 | 0.19066660953    |
| C4  | N11 | 0.01223781266    |
| C5  | N11 | 0.011979744972   |
| C6  | N11 | 0.0067890394639  |
| N7  | N11 | 0.0039421073162  |
| C8  | N11 | 0.0029897152663  |
| N9  | N11 | 0.0025427949673  |
| N1  | N11 | 0.0040650951373  |
| N1  | H12 | 0.77866070754    |
| C2  | H12 | 0.013087091912   |
| N3  | H12 | 0.0099771718276  |
| C4  | H12 | 0.001064725914   |
| C5  | H12 | 0.0053004385329  |
| C6  | H12 | 0.012528548581   |
| N7  | H12 | 0.00029747370673 |
| C8  | H12 | 0.00014709182686 |
| N9  | H12 | 0.0011052877706  |
| N1  | H12 | 0.013534559252   |
| N11 | H12 | 0.0079899221291  |
| N1  | H13 | 0.00020559595721 |
| C2  | H13 | 0.00017431003286 |
| N3  | H13 | 0.0045980253781  |
| C4  | H13 | 0.014583498274   |
| C5  | H13 | 0.0065264402514  |
| C6  | H13 | 0.00094814919026 |
| N7  | H13 | 0.77119564297    |
| C8  | H13 | 0.013057576819   |
| N9  | H13 | 0.011127848746   |
| N1  | H13 | 0.0005296889573  |
| N11 | H13 | 6.5400970058e-05 |
| H12 | H13 | 1.6466615466e-05 |

|     |     |                  |
|-----|-----|------------------|
| N1  | H14 | 0.0006128919779  |
| C2  | H14 | 0.00066873394893 |
| N3  | H14 | 0.0017984426385  |
| C4  | H14 | 0.0079290199367  |
| C5  | H14 | 0.012233454558   |
| C6  | H14 | 0.0018498858277  |
| N7  | H14 | 0.061024887171   |
| C8  | H14 | 0.91810854121    |
| N9  | H14 | 0.073249738375   |
| N1  | H14 | 0.00078468947233 |
| N11 | H14 | 0.00032512508797 |
| H12 | H14 | 5.1648390503e-05 |
| H13 | H14 | 0.00078266385824 |
| N1  | H15 | 0.008766879175   |
| C2  | H15 | 0.013264432679   |
| N3  | H15 | 0.011141448691   |
| C4  | H15 | 0.00038634893591 |
| C5  | H15 | 0.00037925198467 |
| C6  | H15 | 0.00078307756887 |
| N7  | H15 | 9.4789589688e-05 |
| C8  | H15 | 6.3066384751e-05 |
| N9  | H15 | 0.00010652837171 |
| N1  | H15 | 0.00055215534299 |
| N11 | H15 | 0.77741339054    |
| H12 | H15 | 0.0003076137346  |
| H13 | H15 | 5.6882041664e-06 |
| H14 | H15 | 9.4984135771e-06 |
| N1  | H16 | 0.0069183077441  |
| C2  | H16 | 0.014532313897   |
| N3  | H16 | 0.0098493941975  |
| C4  | H16 | 0.0013262635381  |
| C5  | H16 | 0.00046884152606 |
| C6  | H16 | 0.00025058091912 |
| N7  | H16 | 0.00028259558953 |
| C8  | H16 | 0.00012163574016 |
| N9  | H16 | 0.00013333796775 |
| N1  | H16 | 0.00010036954016 |
| N11 | H16 | 0.80607362335    |
| H12 | H16 | 0.0021371299947  |
| H13 | H16 | 4.7401015155e-06 |
| H14 | H16 | 1.9041056236e-05 |
| H15 | H16 | 0.014052087881   |

#### CCSD

| Atom A | Atom B | Delocalization index |
|--------|--------|----------------------|
| N1     | C2     | 0.93793948596        |
| N1     | N3     | 0.15213332946        |
| C2     | N3     | 1.2598648098         |

|    |     |                 |
|----|-----|-----------------|
| N1 | C4  | 0.036163236315  |
| C2 | C4  | 0.032989277721  |
| N3 | C4  | 1.0935379388    |
| N1 | C5  | 0.091613973823  |
| C2 | C5  | 0.028886228754  |
| N3 | C5  | 0.080186476828  |
| C4 | C5  | 1.2836844454    |
| N1 | C6  | 0.79344962766   |
| C2 | C6  | 0.014527195291  |
| N3 | C6  | 0.021288568019  |
| C4 | C6  | 0.073447481719  |
| C5 | C6  | 1.0347682506    |
| N1 | N7  | 0.0074093421643 |
| C2 | N7  | 0.013343304502  |
| N3 | N7  | 0.11759048745   |
| C4 | N7  | 0.97196371453   |
| C5 | N7  | 0.13178595061   |
| C6 | N7  | 0.014628107633  |
| N1 | C8  | 0.0043309248227 |
| C2 | C8  | 0.0066992112912 |
| N3 | C8  | 0.011421247405  |
| C4 | C8  | 0.060204279795  |
| C5 | C8  | 0.067810629981  |
| C6 | C8  | 0.017450644302  |
| N7 | C8  | 0.94060351862   |
| N1 | N9  | 0.012285390269  |
| C2 | N9  | 0.0053225105866 |
| N3 | N9  | 0.018826177759  |
| C4 | N9  | 0.10701265402   |
| C5 | N9  | 1.1212119012    |
| C6 | N9  | 0.05090521139   |
| N7 | N9  | 0.22729164797   |
| C8 | N9  | 1.4184581516    |
| N1 | N1  | 0.22429430913   |
| C2 | N1  | 0.011074796005  |
| N3 | N1  | 0.017196433187  |
| C4 | N1  | 0.030045730136  |
| C5 | N1  | 0.10839813523   |
| C6 | N1  | 1.1387664545    |
| N7 | N1  | 0.0076881916787 |
| C8 | N1  | 0.0081789330971 |
| N9 | N1  | 0.021771166816  |
| N1 | N11 | 0.15380394856   |
| C2 | N11 | 0.9459022508    |
| N3 | N11 | 0.1774486635    |
| C4 | N11 | 0.012410891643  |
| C5 | N11 | 0.0116998046    |
| C6 | N11 | 0.0069773647291 |



|     |     |                  |
|-----|-----|------------------|
| N7  | N11 | 0.0038967907531  |
| C8  | N11 | 0.0030872013841  |
| N9  | N11 | 0.00239150519    |
| N1  | N11 | 0.003871677289   |
| N1  | H12 | 0.77847892963    |
| C2  | H12 | 0.014114463884   |
| N3  | H12 | 0.0098482624082  |
| C4  | H12 | 0.0010953633039  |
| C5  | H12 | 0.0053596857971  |
| C6  | H12 | 0.013161265844   |
| N7  | H12 | 0.00028495725011 |
| C8  | H12 | 0.00016232553134 |
| N9  | H12 | 0.0011264085864  |
| N1  | H12 | 0.013152943543   |
| N11 | H12 | 0.0077318263607  |
| N1  | H13 | 0.00020047623692 |
| C2  | H13 | 0.0001915953619  |
| N3  | H13 | 0.0044374227811  |
| C4  | H13 | 0.01508268124    |
| C5  | H13 | 0.0065540407965  |
| C6  | H13 | 0.0009438119371  |
| N7  | H13 | 0.76934852732    |
| C8  | H13 | 0.013680549089   |
| N9  | H13 | 0.011094650764   |
| N1  | H13 | 0.00052412050278 |
| N11 | H13 | 6.1024657517e-05 |
| H12 | H13 | 1.5971791552e-05 |
| N1  | H14 | 0.00060561806346 |
| C2  | H14 | 0.00070349365611 |
| N3  | H14 | 0.0017366506101  |
| C4  | H14 | 0.0080443002808  |
| C5  | H14 | 0.011841195472   |
| C6  | H14 | 0.0018965867402  |
| N7  | H14 | 0.059288895575   |
| C8  | H14 | 0.92154307599    |
| N9  | H14 | 0.067513126596   |
| N1  | H14 | 0.00077286912941 |
| N11 | H14 | 0.00031969878457 |
| H12 | H14 | 5.3428425232e-05 |
| H13 | H14 | 0.00073402488092 |
| N1  | H15 | 0.0086678446539  |
| C2  | H15 | 0.014328125668   |
| N3  | H15 | 0.010707888923   |
| C4  | H15 | 0.00039971027272 |
| C5  | H15 | 0.00037524855441 |
| C6  | H15 | 0.00083425004801 |
| N7  | H15 | 8.7555791941e-05 |
| C8  | H15 | 6.5025997526e-05 |

|     |     |                  |
|-----|-----|------------------|
| N9  | H15 | 0.0001030401777  |
| N1  | H15 | 0.00055368523047 |
| N11 | H15 | 0.77697032062    |
| H12 | H15 | 0.00030408402674 |
| H13 | H15 | 5.4675026953e-06 |
| H14 | H15 | 8.9308495213e-06 |
| N1  | H16 | 0.0066737094897  |
| C2  | H16 | 0.015689620729   |
| N3  | H16 | 0.0095780780004  |
| C4  | H16 | 0.0013787884174  |
| C5  | H16 | 0.0004557578224  |
| C6  | H16 | 0.00025280849849 |
| N7  | H16 | 0.00029136350387 |
| C8  | H16 | 0.00012607576503 |
| N9  | H16 | 0.00012749899089 |
| N1  | H16 | 9.6437058249e-05 |
| N11 | H16 | 0.80415301528    |
| H12 | H16 | 0.0021260540829  |
| H13 | H16 | 4.2061456941e-06 |
| H14 | H16 | 1.9567434392e-05 |
| H15 | H16 | 0.014460537174   |

## ADENINE

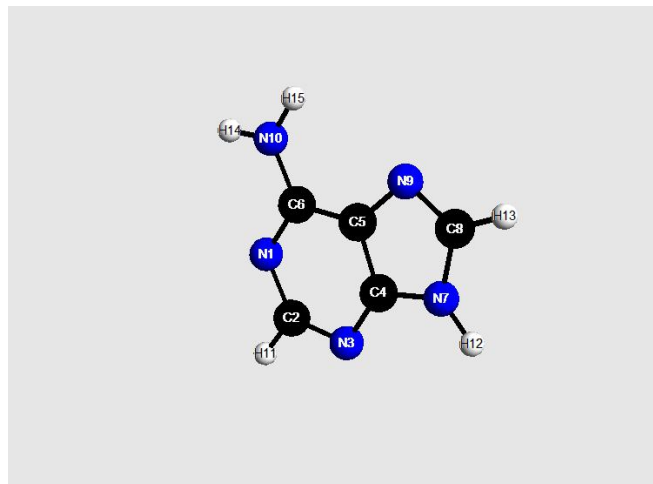

### HARTREE-FOCK

| Atom A | Atom B | Delocalization index |
|--------|--------|----------------------|
| N1     | C2     | 1.1379853734         |
| N1     | N3     | 0.19076364781        |
| C2     | N3     | 1.1943377706         |
| N1     | C4     | 0.058365690822       |
| C2     | C4     | 0.032445766384       |
| N3     | C4     | 1.1639343466         |
| N1     | C5     | 0.098577174431       |
| C2     | C5     | 0.052889187621       |
| N3     | C5     | 0.087867782405       |
| C4     | C5     | 1.2166636034         |
| N1     | C6     | 1.175759933          |
| C2     | C6     | 0.028121387827       |
| N3     | C6     | 0.058017529019       |
| C4     | C6     | 0.073704756442       |
| C5     | C6     | 1.1419967467         |
| N1     | N7     | 0.015117917785       |
| C2     | N7     | 0.013641216657       |
| N3     | N7     | 0.12808377588        |
| C4     | N7     | 0.93170747848        |
| C5     | N7     | 0.12584685325        |
| C6     | N7     | 0.013521462382       |
| N1     | C8     | 0.0071443023968      |
| C2     | C8     | 0.01133779833        |
| N3     | C8     | 0.011493346691       |
| C4     | C8     | 0.046832051652       |
| C5     | C8     | 0.057251824238       |
| C6     | C8     | 0.022606490797       |
| N7     | C8     | 0.93625528555        |
| N1     | N9     | 0.018252886744       |
| C2     | N9     | 0.0089039847391      |

|     |     |                  |
|-----|-----|------------------|
| N3  | N9  | 0.019176718351   |
| C4  | N9  | 0.099725579208   |
| C5  | N9  | 1.0914405986     |
| C6  | N9  | 0.058345846851   |
| N7  | N9  | 0.23992376092    |
| C8  | N9  | 1.3615192497     |
| N1  | N1  | 0.18071454295    |
| C2  | N1  | 0.011629653584   |
| N3  | N1  | 0.024056597875   |
| C4  | N1  | 0.017492628571   |
| C5  | N1  | 0.094452478615   |
| C6  | N1  | 0.97025541782    |
| N7  | N1  | 0.0043526461988  |
| C8  | N1  | 0.0063236694159  |
| N9  | N1  | 0.022021991497   |
| N1  | H11 | 0.074339648877   |
| C2  | H11 | 0.90170654189    |
| N3  | H11 | 0.077961240773   |
| C4  | H11 | 0.0085237228208  |
| C5  | H11 | 0.0038737905401  |
| C6  | H11 | 0.0079082421586  |
| N7  | H11 | 0.001630943536   |
| C8  | H11 | 0.0010201851187  |
| N9  | H11 | 0.00082016244261 |
| N1  | H11 | 0.0011991989316  |
| N1  | H12 | 0.00039679654225 |
| C2  | H12 | 0.00016481739846 |
| N3  | H12 | 0.0043429315522  |
| C4  | H12 | 0.014092929589   |
| C5  | H12 | 0.0065033260681  |
| C6  | H12 | 0.00087252040456 |
| N7  | H12 | 0.7672065273     |
| C8  | H12 | 0.013301380035   |
| N9  | H12 | 0.010710365914   |
| N1  | H12 | 0.00032029510057 |
| H11 | H12 | 2.6089072554e-05 |
| N1  | H13 | 0.00092245881293 |
| C2  | H13 | 0.0011246710526  |
| N3  | H13 | 0.0017104609993  |
| C4  | H13 | 0.0071531728865  |
| C5  | H13 | 0.011526115751   |
| C6  | H13 | 0.0023495297011  |
| N7  | H13 | 0.060996863575   |
| C8  | H13 | 0.91531866057    |
| N9  | H13 | 0.072337698352   |
| N1  | H13 | 0.00056181444392 |
| H11 | H13 | 0.0001168134284  |
| H12 | H13 | 0.0008321180781  |

|     |     |                  |
|-----|-----|------------------|
| N1  | H14 | 0.012229814572   |
| C2  | H14 | 0.00030677095712 |
| N3  | H14 | 0.00078310343563 |
| C4  | H14 | 0.0011746854261  |
| C5  | H14 | 0.0069317361336  |
| C6  | H14 | 0.01542133648    |
| N7  | H14 | 0.00034121348259 |
| C8  | H14 | 0.00018044459337 |
| N9  | H14 | 0.00077621037903 |
| N1  | H14 | 0.78865583694    |
| H11 | H14 | 9.2369133932e-05 |
| H12 | H14 | 5.6099091034e-05 |
| H13 | H14 | 1.8391980655e-05 |
| N1  | H15 | 0.0090892168265  |
| C2  | H15 | 0.0010264547822  |
| N3  | H15 | 0.00071150835793 |
| C4  | H15 | 0.00030566192893 |
| C5  | H15 | 0.0025560720408  |
| C6  | H15 | 0.014315087524   |
| N7  | H15 | 0.00028447780028 |
| C8  | H15 | 0.00055039401127 |
| N9  | H15 | 0.0090212905272  |
| N1  | H15 | 0.78842646002    |
| H11 | H15 | 0.00017921147501 |
| H12 | H15 | 3.0049399103e-05 |
| H13 | H15 | 2.5372103485e-05 |
| H14 | H15 | 0.014337697821   |

#### CCSD

| Atom A | Atom B | Delocalization index |
|--------|--------|----------------------|
| N1     | C2     | 1.1801472283         |
| N1     | N3     | 0.1738188149         |
| C2     | N3     | 1.2336017002         |
| N1     | C4     | 0.057839658096       |
| C2     | C4     | 0.036290316049       |
| N3     | C4     | 1.1903970304         |
| N1     | C5     | 0.093672510905       |
| C2     | C5     | 0.054627531301       |
| N3     | C5     | 0.083545474638       |
| C4     | C5     | 1.2197612801         |
| N1     | C6     | 1.2034404005         |
| C2     | C6     | 0.031698090959       |
| N3     | C6     | 0.057810922826       |
| C4     | C6     | 0.074579396434       |
| C5     | C6     | 1.1485360612         |
| N1     | N7     | 0.014430094801       |
| C2     | N7     | 0.014352795144       |
| N3     | N7     | 0.12081387736        |

|     |     |                  |
|-----|-----|------------------|
| C4  | N7  | 0.94265184725    |
| C5  | N7  | 0.12314685744    |
| C6  | N7  | 0.013358772587   |
| N1  | C8  | 0.0071471975047  |
| C2  | C8  | 0.012365015486   |
| N3  | C8  | 0.01145140856    |
| C4  | C8  | 0.050120441127   |
| C5  | C8  | 0.061168430334   |
| C6  | C8  | 0.02414020849    |
| N7  | C8  | 0.95897309769    |
| N1  | N9  | 0.017838550857   |
| C2  | N9  | 0.0088312345163  |
| N3  | N9  | 0.018304727463   |
| C4  | N9  | 0.096987948667   |
| C5  | N9  | 1.1053506609     |
| C6  | N9  | 0.056997296744   |
| N7  | N9  | 0.22567782934    |
| C8  | N9  | 1.4052299445     |
| N1  | N1  | 0.17029396299    |
| C2  | N1  | 0.012286086504   |
| N3  | N1  | 0.023287809847   |
| C4  | N1  | 0.01760970054    |
| C5  | N1  | 0.092855271968   |
| C6  | N1  | 0.98865712271    |
| N7  | N1  | 0.0042582764716  |
| C8  | N1  | 0.006591323901   |
| N9  | N1  | 0.021976214755   |
| N1  | H11 | 0.069321624359   |
| C2  | H11 | 0.90717407932    |
| N3  | H11 | 0.072877714909   |
| C4  | H11 | 0.0086754194076  |
| C5  | H11 | 0.0037599931223  |
| C6  | H11 | 0.0080716465227  |
| N7  | H11 | 0.0016737714401  |
| C8  | H11 | 0.0010558307144  |
| N9  | H11 | 0.00075992772724 |
| N1  | H11 | 0.0012110704152  |
| N1  | H12 | 0.0003787451225  |
| C2  | H12 | 0.00017936928219 |
| N3  | H12 | 0.0041735577974  |
| C4  | H12 | 0.014602562103   |
| C5  | H12 | 0.0065681157873  |
| C6  | H12 | 0.00087552052399 |
| N7  | H12 | 0.76576489059    |
| C8  | H12 | 0.013992483751   |
| N9  | H12 | 0.010660329078   |
| N1  | H12 | 0.00032262251892 |
| H11 | H12 | 2.1849938953e-05 |

|     |     |                  |
|-----|-----|------------------|
| N1  | H13 | 0.00088643201098 |
| C2  | H13 | 0.0011681559351  |
| N3  | H13 | 0.0016453923488  |
| C4  | H13 | 0.007273884679   |
| C5  | H13 | 0.011194932571   |
| C6  | H13 | 0.0023969126439  |
| N7  | H13 | 0.059112133033   |
| C8  | H13 | 0.91903384285    |
| N9  | H13 | 0.06649960304    |
| N1  | H13 | 0.00055414454961 |
| H11 | H13 | 0.0001189016423  |
| H12 | H13 | 0.00077588927288 |
| N1  | H14 | 0.011741713944   |
| C2  | H14 | 0.00032862559283 |
| N3  | H14 | 0.00075918796124 |
| C4  | H14 | 0.0012019898789  |
| C5  | H14 | 0.0069677118472  |
| C6  | H14 | 0.016126859037   |
| N7  | H14 | 0.00034291198682 |
| C8  | H14 | 0.00018614069642 |
| N9  | H14 | 0.00079074496442 |
| N1  | H14 | 0.78880754371    |
| H11 | H14 | 7.8860750212e-05 |
| H12 | H14 | 5.8397422145e-05 |
| H13 | H14 | 1.7881814816e-05 |
| N1  | H15 | 0.008902672131   |
| C2  | H15 | 0.0011191736131  |
| N3  | H15 | 0.00068433029639 |
| C4  | H15 | 0.00030855115646 |
| C5  | H15 | 0.0025140008022  |
| C6  | H15 | 0.015003486343   |
| N7  | H15 | 0.00028959266634 |
| C8  | H15 | 0.00063578198341 |
| N9  | H15 | 0.0094188189331  |
| N1  | H15 | 0.78702635322    |
| H11 | H15 | 0.00019210998813 |
| H12 | H15 | 3.1546967536e-05 |
| H13 | H15 | 2.312804295e-05  |
| H14 | H15 | 0.014774847569   |

# PYRROLES

## N-METHYLPYRROLE

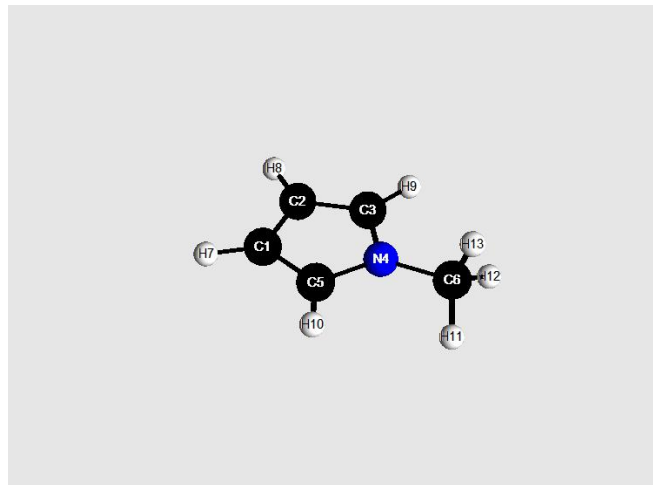

### HARTREE-FOCK

| Atom A | Atom B | Delocalization index |
|--------|--------|----------------------|
| C1     | C2     | 1.2526626552         |
| C1     | C3     | 0.090260487229       |
| C2     | C3     | 1.486056877          |
| C1     | N4     | 0.1684631557         |
| C2     | N4     | 0.16848964072        |
| C3     | N4     | 1.0416219406         |
| C1     | C5     | 1.4860342269         |
| C2     | C5     | 0.090284017277       |
| C3     | C5     | 0.12703652035        |
| N4     | C5     | 1.0416337624         |
| C1     | C6     | 0.008320421526       |
| C2     | C6     | 0.0083239175457      |
| C3     | C6     | 0.02307552318        |
| N4     | C6     | 0.88212109627        |
| C5     | C6     | 0.023101200875       |
| C1     | H7     | 0.98938486742        |
| C2     | H7     | 0.040546449583       |
| C3     | H7     | 0.0089887288998      |
| N4     | H7     | 0.015100105878       |
| C5     | H7     | 0.054699617045       |
| C6     | H7     | 0.0013452228456      |
| C1     | H8     | 0.040548485464       |
| C2     | H8     | 0.98934043868        |
| C3     | H8     | 0.054705544046       |
| N4     | H8     | 0.015099928708       |
| C5     | H8     | 0.0089880906371      |
| C6     | H8     | 0.0013454495405      |
| H7     | H8     | 0.0025536729449      |



|     |     |                  |
|-----|-----|------------------|
| C1  | H9  | 0.010185239058   |
| C2  | H9  | 0.047649156104   |
| C3  | H9  | 0.95792048623    |
| N4  | H9  | 0.064193442654   |
| C5  | H9  | 0.014211862047   |
| C6  | H9  | 0.0059957015185  |
| H7  | H9  | 0.0015501582953  |
| H8  | H9  | 0.0029397101346  |
| C1  | C1  | 0.047646088466   |
| C2  | C1  | 0.010187140976   |
| C3  | C1  | 0.014213303035   |
| N4  | C1  | 0.064186201257   |
| C5  | C1  | 0.95790528359    |
| C6  | C1  | 0.0060046365658  |
| H7  | C1  | 0.0029397225708  |
| H8  | C1  | 0.0015500202429  |
| H9  | C1  | 0.0021524374043  |
| C1  | H11 | 0.0018263325662  |
| C2  | H11 | 0.0021447968387  |
| C3  | H11 | 0.0066010123902  |
| N4  | H11 | 0.066065023716   |
| C5  | H11 | 0.0078686440995  |
| C6  | H11 | 0.93567516645    |
| H7  | H11 | 0.00013015203551 |
| H8  | H11 | 0.0004158154417  |
| H9  | H11 | 0.0006261843127  |
| C1  | H11 | 0.0061745489819  |
| C1  | H12 | 0.0021478117229  |
| C2  | H12 | 0.0018307656449  |
| C3  | H12 | 0.0078626113301  |
| N4  | H12 | 0.066085783217   |
| C5  | H12 | 0.0065998864683  |
| C6  | H12 | 0.93562213058    |
| H7  | H12 | 0.00041580900087 |
| H8  | H12 | 0.00013044090584 |
| H9  | H12 | 0.0061667449863  |
| C1  | H12 | 0.00062518393877 |
| H11 | H12 | 0.038022681335   |
| C1  | H13 | 0.0041327462434  |
| C2  | H13 | 0.004130898087   |
| C3  | H13 | 0.0053238139563  |
| N4  | H13 | 0.068170072054   |
| C5  | H13 | 0.0053232242064  |
| C6  | H13 | 0.93624276401    |
| H7  | H13 | 0.00033257207969 |
| H8  | H13 | 0.00033224963888 |
| H9  | H13 | 0.00038841225255 |
| C1  | H13 | 0.00038666742088 |

|     |     |                |
|-----|-----|----------------|
| H11 | H13 | 0.039242261308 |
| H12 | H13 | 0.039244854601 |

## PYRROLE

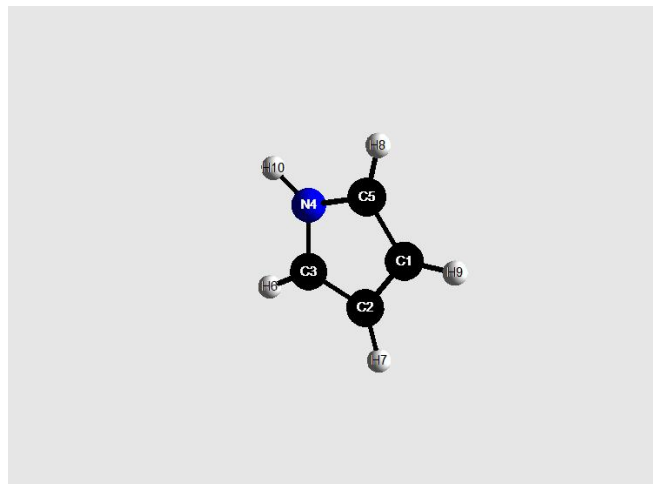

## HARTREE-FOCK

| Atom A | Atom B | Delocalization index |
|--------|--------|----------------------|
| C1     | C2     | 1.2396362895         |
| C1     | C3     | 0.08993376798        |
| C2     | C3     | 1.4996496724         |
| C1     | N4     | 0.1750379207         |
| C2     | N4     | 0.17504848043        |
| C3     | N4     | 1.0358904209         |
| C1     | C5     | 1.4996829088         |
| C2     | C5     | 0.089915816854       |
| C3     | C5     | 0.12787087747        |
| N4     | C5     | 1.0358761598         |
| C1     | H6     | 0.0103475099         |
| C2     | H6     | 0.047125717418       |
| C3     | H6     | 0.95983618309        |
| N4     | H6     | 0.065530629814       |
| C5     | H6     | 0.013960029187       |
| C1     | H7     | 0.039751527596       |
| C2     | H7     | 0.98740272991        |
| C3     | H7     | 0.054956836606       |
| N4     | H7     | 0.015586570729       |
| C5     | H7     | 0.0087924531708      |
| H6     | H7     | 0.0028950012207      |
| C1     | H8     | 0.047122972534       |
| C2     | H8     | 0.010347962952       |
| C3     | H8     | 0.013959974305       |
| N4     | H8     | 0.065525944632       |
| C5     | H8     | 0.95982875625        |
| H6     | H8     | 0.0019789485316      |
| H7     | H8     | 0.0015850045051      |
| C1     | H9     | 0.98744207408        |
| C2     | H9     | 0.039744556587       |

|    |    |                 |
|----|----|-----------------|
| C3 | H9 | 0.0087949576813 |
| N4 | H9 | 0.015588310782  |
| C5 | H9 | 0.054952702722  |
| H6 | H9 | 0.0015849127083 |
| H7 | H9 | 0.0024707266325 |
| H8 | H9 | 0.0028945210166 |
| C1 | C1 | 0.0081250253011 |
| C2 | C1 | 0.0081261548093 |
| C3 | C1 | 0.016137830669  |
| N4 | C1 | 0.79637127608   |
| C5 | C1 | 0.016134476833  |
| H6 | C1 | 0.0014727075915 |
| H7 | C1 | 0.0014491801244 |
| H8 | C1 | 0.0014731149939 |
| H9 | C1 | 0.0014490044068 |

### CCSD

| Atom A | Atom B | Delocalization index |
|--------|--------|----------------------|
| C1     | C2     | 1.068100778          |
| C1     | C3     | 0.066811037413       |
| C2     | C3     | 1.2227642842         |
| C1     | N4     | 0.11810992764        |
| C2     | N4     | 0.1181171659         |
| C3     | N4     | 0.94995918152        |
| C1     | C5     | 1.2227647939         |
| C2     | C5     | 0.066803893135       |
| C3     | C5     | 0.091000302251       |
| N4     | C5     | 0.94997406981        |
| C1     | H6     | 0.0079391347577      |
| C2     | H6     | 0.033686168393       |
| C3     | H6     | 0.83627253538        |
| N4     | H6     | 0.046069548793       |
| C5     | H6     | 0.010630548522       |
| C1     | H7     | 0.030432122148       |
| C2     | H7     | 0.85354196092        |
| C3     | H7     | 0.038874716103       |
| N4     | H7     | 0.011042289353       |
| C5     | H7     | 0.0069114552466      |
| H6     | H7     | 0.0021921048382      |
| C1     | H8     | 0.03367542456        |
| C2     | H8     | 0.0079401541688      |
| C3     | H8     | 0.010630317356       |
| N4     | H8     | 0.046071067372       |
| C5     | H8     | 0.8363119411         |
| H6     | H8     | 0.0017533433658      |
| H7     | H8     | 0.0014728387529      |
| C1     | H9     | 0.85352023155        |
| C2     | H9     | 0.030431870105       |

|    |    |                 |
|----|----|-----------------|
| C3 | H9 | 0.0069123160444 |
| N4 | H9 | 0.011042365209  |
| C5 | H9 | 0.03887714872   |
| H6 | H9 | 0.0014728374612 |
| H7 | H9 | 0.0021390649936 |
| H8 | H9 | 0.0021921580361 |
| C1 | C1 | 0.0069896501218 |
| C2 | C1 | 0.006990039393  |
| C3 | C1 | 0.01518248827   |
| N4 | C1 | 0.71761710522   |
| C5 | C1 | 0.015183014127  |
| H6 | C1 | 0.0014031165561 |
| H7 | C1 | 0.0014484671002 |
| H8 | C1 | 0.0014031466703 |
| H9 | C1 | 0.0014484578093 |

## 2-METHYLPYRROLE

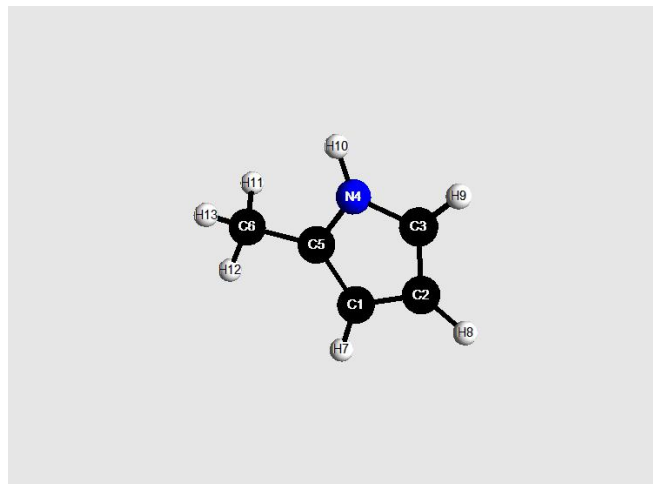

### HARTREE-FOCK

| Atom A | Atom B | Delocalization index |
|--------|--------|----------------------|
| C1     | C2     | 1.2260021454         |
| C1     | C3     | 0.090866148348       |
| C2     | C3     | 1.5191492904         |
| C1     | N4     | 0.16900925851        |
| C2     | N4     | 0.17293292559        |
| C3     | N4     | 1.0267150984         |
| C1     | C5     | 1.4831500236         |
| C2     | C5     | 0.084755776985       |
| C3     | C5     | 0.1172459277         |
| N4     | C5     | 1.015820035          |
| C1     | C6     | 0.046500316205       |
| C2     | C6     | 0.0085956526448      |
| C3     | C6     | 0.011029481728       |
| N4     | C6     | 0.070991348028       |
| C5     | C6     | 0.99341827691        |
| C1     | H7     | 0.98841209564        |
| C2     | H7     | 0.039765633585       |
| C3     | H7     | 0.0089067494311      |
| N4     | H7     | 0.015328451747       |
| C5     | H7     | 0.055070147089       |
| C6     | H7     | 0.0050061251704      |
| C1     | H8     | 0.039366800019       |
| C2     | H8     | 0.98896120277        |
| C3     | H8     | 0.056296476956       |
| N4     | H8     | 0.015695816326       |
| C5     | H8     | 0.0084392100659      |
| C6     | H8     | 0.0013050236596      |
| H7     | H8     | 0.0024412487935      |
| C1     | H9     | 0.010709495905       |
| C2     | H9     | 0.048513150688       |

|     |     |                  |
|-----|-----|------------------|
| C3  | H9  | 0.96306492871    |
| N4  | H9  | 0.064435306167   |
| C5  | H9  | 0.013224649205   |
| C6  | H9  | 0.0016504555069  |
| H7  | H9  | 0.0016029397653  |
| H8  | H9  | 0.0030448109033  |
| C1  | C1  | 0.0084506880685  |
| C2  | C1  | 0.0080321186078  |
| C3  | C1  | 0.016444996997   |
| N4  | C1  | 0.80307740841    |
| C5  | C1  | 0.016474118386   |
| C6  | C1  | 0.0030766040614  |
| H7  | C1  | 0.0015671974744  |
| H8  | C1  | 0.0014269871524  |
| H9  | C1  | 0.0014638671729  |
| C1  | H11 | 0.012783378288   |
| C2  | H11 | 0.0022648315084  |
| C3  | H11 | 0.0040291901982  |
| N4  | H11 | 0.0094912864479  |
| C5  | H11 | 0.044718782109   |
| C6  | H11 | 0.95866373719    |
| H7  | H11 | 0.00069158462463 |
| H8  | H11 | 0.00027420905905 |
| H9  | H11 | 0.00034516042715 |
| C1  | H11 | 0.00077661937362 |
| C1  | H12 | 0.0091414783593  |
| C2  | H12 | 0.00085836132054 |
| C3  | H12 | 0.0013466827781  |
| N4  | H12 | 0.010513206821   |
| C5  | H12 | 0.044028560136   |
| C6  | H12 | 0.96001892473    |
| H7  | H12 | 0.0040432504435  |
| H8  | H12 | 8.4879941776e-05 |
| H9  | H12 | 0.00040302639553 |
| C1  | H12 | 0.00039455321628 |
| H11 | H12 | 0.041019476622   |
| C1  | H13 | 0.012836644171   |
| C2  | H13 | 0.0022696516231  |
| C3  | H13 | 0.0040700491382  |
| N4  | H13 | 0.0094404491652  |
| C5  | H13 | 0.044742386978   |
| C6  | H13 | 0.95862610724    |
| H7  | H13 | 0.0006929830369  |
| H8  | H13 | 0.00027224293813 |
| H9  | H13 | 0.00034854919077 |
| C1  | H13 | 0.00075218138066 |
| H11 | H13 | 0.042499719461   |
| H12 | H13 | 0.041008378478   |





### 3-METHYLPYRROLE

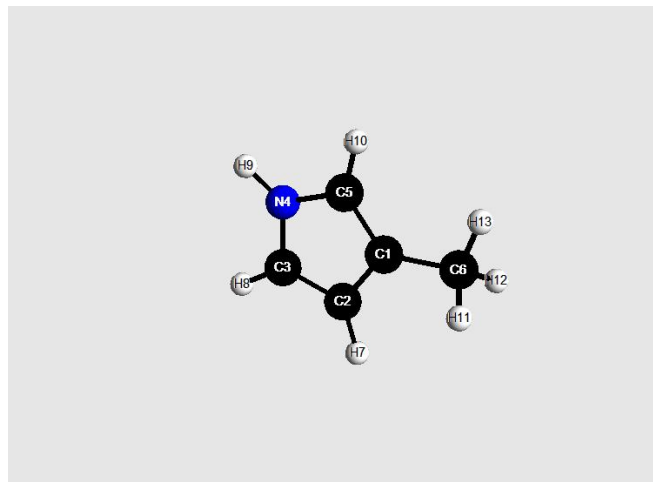

### HARTREE-FOCK

| Atom A | Atom B | Delocalization index |
|--------|--------|----------------------|
| C1     | C2     | 1.2179084574         |
| C1     | C3     | 0.086057189123       |
| C2     | C3     | 1.4982170772         |
| C1     | N4     | 0.1657577764         |
| C2     | N4     | 0.1764138871         |
| C3     | N4     | 1.0463133443         |
| C1     | C5     | 1.4872592418         |
| C2     | C5     | 0.088218807606       |
| C3     | C5     | 0.12626285703        |
| N4     | C5     | 1.0288516114         |
| C1     | C6     | 1.0136340699         |
| C2     | C6     | 0.040838749981       |
| C3     | C6     | 0.0083102207067      |
| N4     | C6     | 0.012917960856       |
| C5     | C6     | 0.053710960651       |
| C1     | H7     | 0.039283230199       |
| C2     | H7     | 0.98831827085        |
| C3     | H7     | 0.055916379883       |
| N4     | H7     | 0.015653408884       |
| C5     | H7     | 0.0086705207866      |
| C6     | H7     | 0.0042624268891      |
| C1     | H8     | 0.010014736583       |
| C2     | H8     | 0.047376665175       |
| C3     | H8     | 0.96033377522        |
| N4     | H8     | 0.065887306656       |
| C5     | H8     | 0.014199599745       |
| C6     | H8     | 0.0013565326588      |
| H7     | H8     | 0.0029881437565      |
| C1     | H9     | 0.0078688485908      |
| C2     | H9     | 0.008358297216       |

|     |     |                  |
|-----|-----|------------------|
| C3  | H9  | 0.016533334604   |
| N4  | H9  | 0.79988223513    |
| C5  | H9  | 0.016174730465   |
| C6  | H9  | 0.001246541821   |
| H7  | H9  | 0.0014781435272  |
| H8  | H9  | 0.0015355980336  |
| C1  | C1  | 0.047705780242   |
| C2  | C1  | 0.010126216513   |
| C3  | C1  | 0.013950711872   |
| N4  | C1  | 0.064801971641   |
| C5  | C1  | 0.96125245415    |
| C6  | C1  | 0.004812009493   |
| H7  | C1  | 0.0017028810662  |
| H8  | C1  | 0.001994244384   |
| H9  | C1  | 0.0014360767879  |
| C1  | H11 | 0.045698754137   |
| C2  | H11 | 0.0069289386057  |
| C3  | H11 | 0.0012187551189  |
| N4  | H11 | 0.0041202178881  |
| C5  | H11 | 0.013178436842   |
| C6  | H11 | 0.95996284751    |
| H7  | H11 | 0.0010882575339  |
| H8  | H11 | 0.00011909765963 |
| H9  | H11 | 0.00021408335735 |
| C1  | H11 | 0.00066575609892 |
| C1  | H12 | 0.045681314756   |
| C2  | H12 | 0.0069175670194  |
| C3  | H12 | 0.0012129298743  |
| N4  | H12 | 0.004084354847   |
| C5  | H12 | 0.013167275095   |
| C6  | H12 | 0.96001108601    |
| H7  | H12 | 0.0011024387942  |
| H8  | H12 | 0.00011847748121 |
| H9  | H12 | 0.00022819200922 |
| C1  | H12 | 0.00066655593088 |
| H11 | H12 | 0.043245925763   |
| C1  | H13 | 0.044775196374   |
| C2  | H13 | 0.0085934270005  |
| C3  | H13 | 0.001734360676   |
| N4  | H13 | 0.0010602892595  |
| C5  | H13 | 0.010655852387   |
| C6  | H13 | 0.96305235365    |
| H7  | H13 | 0.00045881801125 |
| H8  | H13 | 0.00040262816929 |
| H9  | H13 | 3.8749029372e-05 |
| C1  | H13 | 0.0040371757087  |
| H11 | H13 | 0.042822781592   |
| H12 | H13 | 0.042822692505   |



## SILICON COMPOUNDS

### SILANE

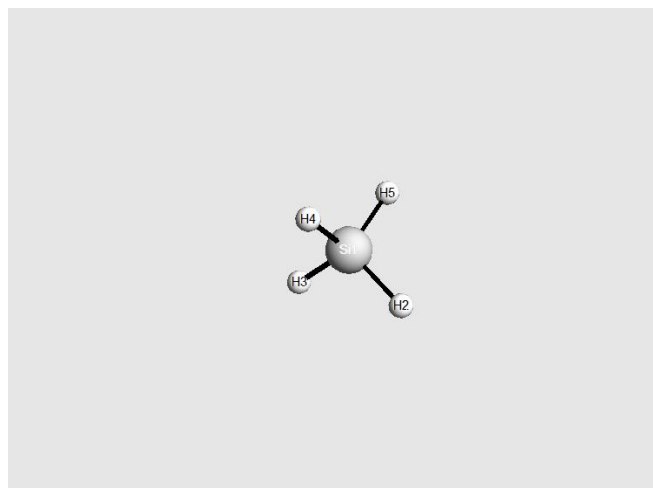

### HARTREE-FOCK

| Atom A | Atom B | Delocalization index |
|--------|--------|----------------------|
| Si1    | H2     | 0.4767373251         |
| Si1    | H3     | 0.47673054735        |
| H2     | H3     | 0.10754879703        |
| Si1    | H4     | 0.4767551587         |
| H2     | H4     | 0.10754511968        |
| H3     | H4     | 0.10754517765        |
| Si1    | H5     | 0.47674479457        |
| H2     | H5     | 0.10754496961        |
| H3     | H5     | 0.10754522454        |
| H4     | H5     | 0.10754791368        |

## TETRAMETHYLSILANE

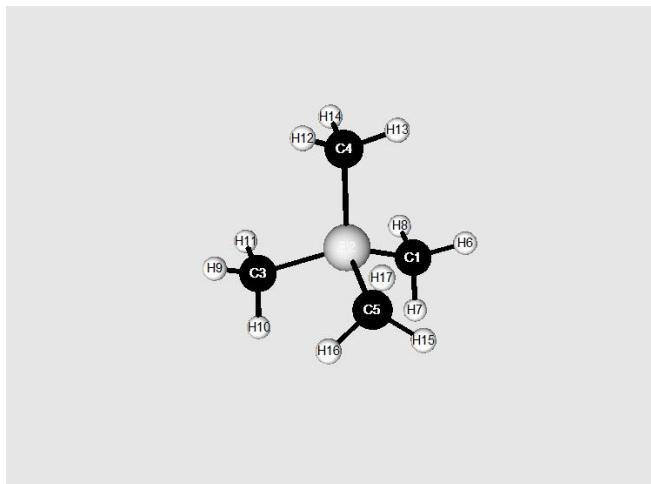

### HARTREE-FOCK

| Atom A | Atom B | Delocalization index |
|--------|--------|----------------------|
| C1     | Si2    | 0.40904696619        |
| C1     | C3     | 0.098984322697       |
| Si2    | C3     | 0.40906700472        |
| C1     | C4     | 0.098997924208       |
| Si2    | C4     | 0.40815026514        |
| C3     | C4     | 0.099001569567       |
| C1     | C5     | 0.096184734935       |
| Si2    | C5     | 0.40851866766        |
| C3     | C5     | 0.096195687354       |
| C4     | C5     | 0.096188000427       |
| C1     | H6     | 1.0107976916         |
| Si2    | H6     | 0.01264501215        |
| C3     | H6     | 0.0088334202563      |
| C4     | H6     | 0.0046381254297      |
| C5     | H6     | 0.0044449213345      |
| C1     | H7     | 1.0107186323         |
| Si2    | H7     | 0.012586731505       |
| C3     | H7     | 0.0046362983889      |
| C4     | H7     | 0.0088330772994      |
| C5     | H7     | 0.0044461764195      |
| H6     | H7     | 0.045133182235       |
| C1     | H8     | 1.010777092          |
| Si2    | H8     | 0.012463125799       |
| C3     | H8     | 0.0045939139009      |
| C4     | H8     | 0.0045923551909      |
| C5     | H8     | 0.0084884016981      |
| H6     | H8     | 0.044941419682       |
| H7     | H8     | 0.044941507137       |
| C1     | H9     | 0.0088307175361      |
| Si2    | H9     | 0.012637021475       |

|     |     |                  |
|-----|-----|------------------|
| C3  | H9  | 1.0108243083     |
| C4  | H9  | 0.0046339217623  |
| C5  | H9  | 0.0044454062231  |
| H6  | H9  | 0.0014055506801  |
| H7  | H9  | 0.0003924543513  |
| H8  | H9  | 0.00039440844897 |
| C1  | C1  | 0.004632046959   |
| Si2 | C1  | 0.012592488337   |
| C3  | C1  | 1.0107812917     |
| C4  | C1  | 0.0088312729714  |
| C5  | C1  | 0.0044468176626  |
| H6  | C1  | 0.00039253950803 |
| H7  | C1  | 0.0016763367878  |
| H8  | C1  | 0.00022484251234 |
| H9  | C1  | 0.045133111169   |
| C1  | H11 | 0.0045905049399  |
| Si2 | H11 | 0.012468571456   |
| C3  | H11 | 1.0107989846     |
| C4  | H11 | 0.0045918033573  |
| C5  | H11 | 0.0084893399653  |
| H6  | H11 | 0.00039434861408 |
| H7  | H11 | 0.00022480531083 |
| H8  | H11 | 0.0016912065548  |
| H9  | H11 | 0.044941572005   |
| C1  | H11 | 0.044940994888   |
| C1  | H12 | 0.0088327383246  |
| Si2 | H12 | 0.012514722701   |
| C3  | H12 | 0.0046405299052  |
| C4  | H12 | 1.0107088465     |
| C5  | H12 | 0.0044489033155  |
| H6  | H12 | 0.00039259598771 |
| H7  | H12 | 0.0014056191382  |
| H8  | H12 | 0.00039435679233 |
| H9  | H12 | 0.0016769319696  |
| C1  | H12 | 0.00039263772826 |
| H11 | H12 | 0.00022487203357 |
| C1  | H13 | 0.0046343656906  |
| Si2 | H13 | 0.012533073123   |
| C3  | H13 | 0.0088365223767  |
| C4  | H13 | 1.0107257244     |
| C5  | H13 | 0.004446600711   |
| H6  | H13 | 0.0016765966595  |
| H7  | H13 | 0.00039247347384 |
| H8  | H13 | 0.00022482518051 |
| H9  | H13 | 0.00039249667688 |
| C1  | H13 | 0.0014056065058  |
| H11 | H13 | 0.000394459531   |
| H12 | H13 | 0.045132955474   |

|     |     |                  |
|-----|-----|------------------|
| C1  | H14 | 0.0045968111341  |
| Si2 | H14 | 0.012392541415   |
| C3  | H14 | 0.0045978970442  |
| C4  | H14 | 1.0106956982     |
| C5  | H14 | 0.0084935449106  |
| H6  | H14 | 0.00022489089311 |
| H7  | H14 | 0.00039452563209 |
| H8  | H14 | 0.0016918156209  |
| H9  | H14 | 0.00022484580325 |
| C1  | H14 | 0.0003943466956  |
| H11 | H14 | 0.0016914613663  |
| H12 | H14 | 0.044941355807   |
| H13 | H14 | 0.044941578561   |
| C1  | H15 | 0.0099324859028  |
| Si2 | H15 | 0.01209226984    |
| C3  | H15 | 0.004737245324   |
| C4  | H15 | 0.0047249096127  |
| C5  | H15 | 1.0104310608     |
| H6  | H15 | 0.00190683433    |
| H7  | H15 | 0.0019030747627  |
| H8  | H15 | 0.0011490888579  |
| H9  | H15 | 0.00040001533129 |
| C1  | H15 | 0.00011967932223 |
| H11 | H15 | 0.0006983250968  |
| H12 | H15 | 0.00039961859386 |
| H13 | H15 | 0.00011959511459 |
| H14 | H15 | 0.00069664081407 |
| C1  | H16 | 0.0047284679451  |
| Si2 | H16 | 0.012087402615   |
| C3  | H16 | 0.0099381330495  |
| C4  | H16 | 0.0047332745845  |
| C5  | H16 | 1.0104351649     |
| H6  | H16 | 0.00039969525836 |
| H7  | H16 | 0.00011958171183 |
| H8  | H16 | 0.00069665850846 |
| H9  | H16 | 0.0019029865886  |
| C1  | H16 | 0.0019069418088  |
| H11 | H16 | 0.0011490903256  |
| H12 | H16 | 0.00011964703871 |
| H13 | H16 | 0.00040001794363 |
| H14 | H16 | 0.00069830097204 |
| H15 | H16 | 0.045010106337   |
| C1  | H17 | 0.0047355630037  |
| Si2 | H17 | 0.012062643701   |
| C3  | H17 | 0.004727256757   |
| C4  | H17 | 0.0099225665342  |
| C5  | H17 | 1.0105474296     |
| H6  | H17 | 0.00011968746931 |

|     |     |                  |
|-----|-----|------------------|
| H7  | H17 | 0.00039999216185 |
| H8  | H17 | 0.00069831754117 |
| H9  | H17 | 0.00011958075436 |
| C1  | H17 | 0.00039970536184 |
| H11 | H17 | 0.00069665521976 |
| H12 | H17 | 0.0019061368722  |
| H13 | H17 | 0.0019031863     |
| H14 | H17 | 0.0011490049208  |
| H15 | H17 | 0.045009752969   |
| H16 | H17 | 0.045009955807   |



## TETRAETHYLSILANE

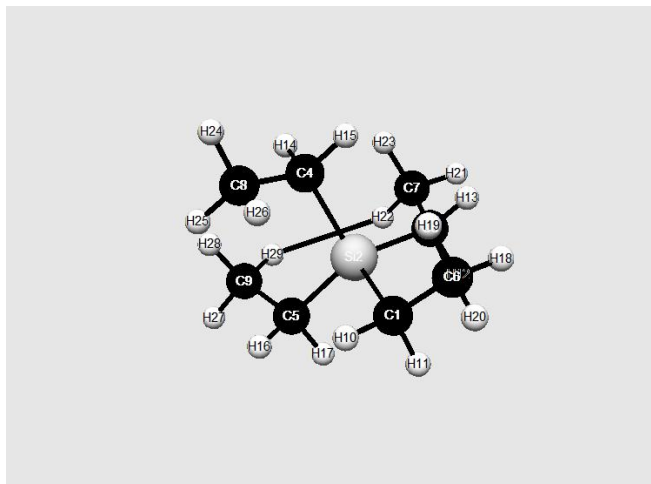

### HARTREE-FOCK

| Atom A | Atom B | Delocalization index |
|--------|--------|----------------------|
| C1     | Si2    | 0.40565840878        |
| C1     | C3     | 0.093930048731       |
| Si2    | C3     | 0.409559486          |
| C1     | C4     | 0.090103467082       |
| Si2    | C4     | 0.40951845222        |
| C3     | C4     | 0.093360722226       |
| C1     | C5     | 0.095870375847       |
| Si2    | C5     | 0.40944241408        |
| C3     | C5     | 0.089778232759       |
| C4     | C5     | 0.090560832227       |
| C1     | C6     | 1.0181290515         |
| Si2    | C6     | 0.011385138464       |
| C3     | C6     | 0.0059020877916      |
| C4     | C6     | 0.0054439534307      |
| C5     | C6     | 0.0074661944522      |
| C1     | C7     | 0.0075915008498      |
| Si2    | C7     | 0.011322422824       |
| C3     | C7     | 1.0182239761         |
| C4     | C7     | 0.0051011042901      |
| C5     | C7     | 0.003720485647       |
| C6     | C7     | 0.00054375042844     |
| C1     | C8     | 0.0063169577679      |
| Si2    | C8     | 0.011608482126       |
| C3     | C8     | 0.0074802311857      |
| C4     | C8     | 1.0178031674         |
| C5     | C8     | 0.0053109317391      |
| C6     | C8     | 0.00068700578454     |
| C7     | C8     | 0.00046039514877     |
| C1     | C9     | 0.0073377956702      |
| Si2    | C9     | 0.01125609213        |

|     |     |                  |
|-----|-----|------------------|
| C3  | C9  | 0.002553348233   |
| C4  | C9  | 0.0070817421079  |
| C5  | C9  | 1.0178628477     |
| C6  | C9  | 0.0010365769608  |
| C7  | C9  | 0.0025233286999  |
| C8  | C9  | 0.0011016064723  |
| C1  | C1  | 0.9924790422     |
| Si2 | C1  | 0.012337244174   |
| C3  | C1  | 0.0075665093398  |
| C4  | C1  | 0.0028951566312  |
| C5  | C1  | 0.0061795848986  |
| C6  | C1  | 0.043873267623   |
| C7  | C1  | 0.0010340336748  |
| C8  | C1  | 0.0043641819134  |
| C9  | C1  | 0.00043820901074 |
| C1  | H11 | 0.99575105673    |
| Si2 | H11 | 0.012650268464   |
| C3  | H11 | 0.0047667683792  |
| C4  | H11 | 0.0074808174812  |
| C5  | H11 | 0.0058528087742  |
| C6  | H11 | 0.044252033784   |
| C7  | H11 | 0.00037235480801 |
| C8  | H11 | 0.00052142166544 |
| C9  | H11 | 0.00060003758257 |
| C1  | H11 | 0.046037943661   |
| C1  | H12 | 0.0060911712824  |
| Si2 | H12 | 0.012731092234   |
| C3  | H12 | 0.99584902802    |
| C4  | H12 | 0.0076397501169  |
| C5  | H12 | 0.0041224757035  |
| C6  | H12 | 0.00056731590711 |
| C7  | H12 | 0.04414459532    |
| C8  | H12 | 0.0010071280334  |
| C9  | H12 | 0.00021068025054 |
| C1  | H12 | 0.00049179784849 |
| H11 | H12 | 0.0027200793501  |
| C1  | H13 | 0.0037871544311  |
| Si2 | H13 | 0.012764504608   |
| C3  | H13 | 0.99186662726    |
| C4  | H13 | 0.0048740899874  |
| C5  | H13 | 0.0074711195636  |
| C6  | H13 | 0.0057305301769  |
| C7  | H13 | 0.043937501716   |
| C8  | H13 | 0.00037577183981 |
| C9  | H13 | 0.00019106968266 |
| C1  | H13 | 0.0002044380331  |
| H11 | H13 | 0.000235147379   |
| H12 | H13 | 0.046171315056   |

|     |     |                  |
|-----|-----|------------------|
| C1  | H14 | 0.0074606576668  |
| Si2 | H14 | 0.012482216661   |
| C3  | H14 | 0.0031867106137  |
| C4  | H14 | 0.99134133683    |
| C5  | H14 | 0.0031560353003  |
| C6  | H14 | 0.00044155814743 |
| C7  | H14 | 0.0040249138138  |
| C8  | H14 | 0.043539697664   |
| C9  | H14 | 0.0047392762114  |
| C1  | H14 | 0.00022415617234 |
| H11 | H14 | 0.00098123797405 |
| H12 | H14 | 0.00017884569349 |
| H13 | H14 | 0.00022974760504 |
| C1  | H15 | 0.0028006699333  |
| Si2 | H15 | 0.012610762902   |
| C3  | H15 | 0.0058183173875  |
| C4  | H15 | 0.99367429364    |
| C5  | H15 | 0.0075207852388  |
| C6  | H15 | 0.0035133580972  |
| C7  | H15 | 0.00048828803693 |
| C8  | H15 | 0.043898922587   |
| C9  | H15 | 0.00057985742267 |
| C1  | H15 | 0.00013995307332 |
| H11 | H15 | 0.00021972687404 |
| H12 | H15 | 0.00047761720287 |
| H13 | H15 | 0.002664675676   |
| H14 | H15 | 0.045542224849   |
| C1  | H16 | 0.0088108788612  |
| Si2 | H16 | 0.012556152547   |
| C3  | H16 | 0.0073430498671  |
| C4  | H16 | 0.0024322352252  |
| C5  | H16 | 0.99315659719    |
| C6  | H16 | 0.00087480668085 |
| C7  | H16 | 0.00021896069152 |
| C8  | H16 | 0.0022741512896  |
| C9  | H16 | 0.044001452074   |
| C1  | H16 | 0.0048423900141  |
| H11 | H16 | 0.00068353349017 |
| H12 | H16 | 0.00028758223409 |
| H13 | H16 | 0.0010095771463  |
| H14 | H16 | 0.00014005923962 |
| H15 | H16 | 0.00023795834983 |
| C1  | H17 | 0.0043112542434  |
| Si2 | H17 | 0.012825705213   |
| C3  | H17 | 0.0058122461865  |
| C4  | H17 | 0.007256271353   |
| C5  | H17 | 0.9965304411     |
| C6  | H17 | 0.00033138190096 |

|     |     |                  |
|-----|-----|------------------|
| C7  | H17 | 0.00047610305066 |
| C8  | H17 | 0.00041268613603 |
| C9  | H17 | 0.0440716205     |
| C1  | H17 | 0.00038810413924 |
| H11 | H17 | 0.0023167683287  |
| H12 | H17 | 0.0021450591184  |
| H13 | H17 | 0.00047066178358 |
| H14 | H17 | 0.00021146413052 |
| H15 | H17 | 0.00094516056713 |
| H16 | H17 | 0.046271293817   |
| C1  | H18 | 0.045108212842   |
| Si2 | H18 | 0.0010710790129  |
| C3  | H18 | 0.0071169098962  |
| C4  | H18 | 0.00037730322878 |
| C5  | H18 | 0.0003217898849  |
| C6  | H18 | 0.96081826161    |
| C7  | H18 | 0.00099534609592 |
| C8  | H18 | 7.3996179176e-05 |
| C9  | H18 | 3.0447721333e-05 |
| C1  | H18 | 0.011538728485   |
| H11 | H18 | 0.0035232801744  |
| H12 | H18 | 0.00084849669774 |
| H13 | H18 | 0.0096735010215  |
| H14 | H18 | 2.7364906898e-05 |
| H15 | H18 | 0.00024418501189 |
| H16 | H18 | 0.00016979099882 |
| H17 | H18 | 1.8477832598e-05 |
| C1  | H19 | 0.045373666329   |
| Si2 | H19 | 0.00117741439    |
| C3  | H19 | 0.00043863783469 |
| C4  | H19 | 0.005850457044   |
| C5  | H19 | 0.00034748236825 |
| C6  | H19 | 0.96096843862    |
| C7  | H19 | 3.4301448417e-05 |
| C8  | H19 | 0.0020408983405  |
| C9  | H19 | 3.4578600113e-05 |
| C1  | H19 | 0.0031547998518  |
| H11 | H19 | 0.011702355294   |
| H12 | H19 | 8.3864065381e-05 |
| H13 | H19 | 0.00041341020364 |
| H14 | H19 | 0.00074886172121 |
| H15 | H19 | 0.0060559854688  |
| H16 | H19 | 3.7811176329e-05 |
| H17 | H19 | 9.6402949031e-05 |
| H18 | H19 | 0.045091460312   |
| C1  | Si2 | 0.051095705835   |
| Si2 | Si2 | 0.0043535239966  |
| C3  | Si2 | 0.00091074699978 |

|     |     |                  |
|-----|-----|------------------|
| C4  | Si2 | 0.00083179758123 |
| C5  | Si2 | 0.0018195592673  |
| C6  | Si2 | 0.96363448628    |
| C7  | Si2 | 7.2772963189e-05 |
| C8  | Si2 | 5.5620968387e-05 |
| C9  | Si2 | 0.00027419122578 |
| C1  | Si2 | 0.0044211088545  |
| H11 | Si2 | 0.0041494342636  |
| H12 | Si2 | 5.5458646147e-05 |
| H13 | Si2 | 0.00081572131441 |
| H14 | Si2 | 6.9297889077e-05 |
| H15 | Si2 | 0.0005504495151  |
| H16 | Si2 | 5.7087511715e-05 |
| H17 | Si2 | 3.6263537819e-05 |
| H18 | Si2 | 0.044404846187   |
| H19 | Si2 | 0.044611453292   |
| C1  | H21 | 0.0018277877891  |
| Si2 | H21 | 0.0043436089446  |
| C3  | H21 | 0.051223907217   |
| C4  | H21 | 0.00078439511185 |
| C5  | H21 | 0.00061032237484 |
| C6  | H21 | 4.7397629002e-05 |
| C7  | H21 | 0.96345415406    |
| C8  | H21 | 6.6833358531e-05 |
| C9  | H21 | 0.00033872941063 |
| C1  | H21 | 0.00031363444583 |
| H11 | H21 | 4.2370758905e-05 |
| H12 | H21 | 0.0038934900766  |
| H13 | H21 | 0.0049015713831  |
| H14 | H21 | 0.00053648033878 |
| H15 | H21 | 4.6229810539e-05 |
| H16 | H21 | 7.4289849142e-05 |
| H17 | H21 | 5.2250385089e-05 |
| H18 | H21 | 3.6363472224e-05 |
| H19 | H21 | 5.6922222275e-06 |
| Si2 | H21 | 2.245127215e-05  |
| C1  | H22 | 0.0002812130866  |
| Si2 | H22 | 0.0009235506743  |
| C3  | H22 | 0.045353389986   |
| C4  | H22 | 0.0003409458101  |
| C5  | H22 | 0.0023090865025  |
| C6  | H22 | 0.00010285558236 |
| C7  | H22 | 0.95865244663    |
| C8  | H22 | 2.7721730896e-05 |
| C9  | H22 | 0.0068670376555  |
| C1  | H22 | 2.8236766777e-05 |
| H11 | H22 | 1.6420966294e-05 |
| H12 | H22 | 0.0038640673533  |

|     |     |                  |
|-----|-----|------------------|
| H13 | H22 | 0.01128397252    |
| H14 | H22 | 0.000217988444   |
| H15 | H22 | 6.9046517016e-05 |
| H16 | H22 | 0.00028603596406 |
| H17 | H22 | 0.00060958847545 |
| H18 | H22 | 0.00024469042311 |
| H19 | H22 | 6.7926341206e-06 |
| Si2 | H22 | 2.3006333462e-05 |
| H21 | H22 | 0.044041897042   |
| C1  | H23 | 0.00033978147786 |
| Si2 | H23 | 0.001207298442   |
| C3  | H23 | 0.045668609521   |
| C4  | H23 | 0.0063073905546  |
| C5  | H23 | 0.00032980365245 |
| C6  | H23 | 2.227784479e-05  |
| C7  | H23 | 0.96120655873    |
| C8  | H23 | 0.00093311670135 |
| C9  | H23 | 0.0004175493794  |
| C1  | H23 | 3.0310015245e-05 |
| H11 | H23 | 0.00010399833502 |
| H12 | H23 | 0.011703726734   |
| H13 | H23 | 0.0030234659134  |
| H14 | H23 | 0.0074533687845  |
| H15 | H23 | 0.00073331367534 |
| H16 | H23 | 3.5382742489e-05 |
| H17 | H23 | 6.5395010533e-05 |
| H18 | H23 | 5.2659187158e-05 |
| H19 | H23 | 4.5636356773e-06 |
| Si2 | H23 | 3.4386724735e-06 |
| H21 | H23 | 0.044519701604   |
| H22 | H23 | 0.044893079408   |
| C1  | H24 | 0.00089610690183 |
| Si2 | H24 | 0.0043653197418  |
| C3  | H24 | 0.0019194512211  |
| C4  | H24 | 0.051056261261   |
| C5  | H24 | 0.00083465801685 |
| C6  | H24 | 5.5254302481e-05 |
| C7  | H24 | 4.9779366361e-05 |
| C8  | H24 | 0.96355589649    |
| C9  | H24 | 7.7044979582e-05 |
| C1  | H24 | 0.00069398757713 |
| H11 | H24 | 6.8797998532e-05 |
| H12 | H24 | 0.00032891243263 |
| H13 | H24 | 4.345660028e-05  |
| H14 | H24 | 0.0044049182682  |
| H15 | H24 | 0.004073369396   |
| H16 | H24 | 0.00038155820378 |
| H17 | H24 | 6.9494815963e-05 |

|     |     |                  |
|-----|-----|------------------|
| H18 | H24 | 6.2551864582e-06 |
| H19 | H24 | 0.00013649580299 |
| Si2 | H24 | 2.8466270397e-06 |
| H21 | H24 | 2.1834392305e-05 |
| H22 | H24 | 5.0653672199e-06 |
| H23 | H24 | 3.7053934749e-05 |
| C1  | H25 | 0.00050169498039 |
| Si2 | H25 | 0.0012129322195  |
| C3  | H25 | 0.00033992971806 |
| C4  | H25 | 0.045262690071   |
| C5  | H25 | 0.0053787682627  |
| C6  | H25 | 7.392139865e-05  |
| C7  | H25 | 1.9680091415e-05 |
| C8  | H25 | 0.96015189812    |
| C9  | H25 | 0.0034477267711  |
| C1  | H25 | 0.00042696081731 |
| H11 | H25 | 3.8968342883e-05 |
| H12 | H25 | 3.2754847234e-05 |
| H13 | H25 | 0.00010075838152 |
| H14 | H25 | 0.0030387527886  |
| H15 | H25 | 0.011612894077   |
| H16 | H25 | 0.0040143447535  |
| H17 | H25 | 0.0007057313975  |
| H18 | H25 | 2.1783303438e-05 |
| H19 | H25 | 0.00024746163991 |
| Si2 | H25 | 5.6170807999e-06 |
| H21 | H25 | 3.5288189432e-06 |
| H22 | H25 | 6.2163730623e-06 |
| H23 | H25 | 4.7078616895e-05 |
| H24 | H25 | 0.044539618002   |
| C1  | H26 | 0.006497248578   |
| Si2 | H26 | 0.0011054212993  |
| C3  | H26 | 0.00029271216924 |
| C4  | H26 | 0.044997423363   |
| C5  | H26 | 0.00036298884493 |
| C6  | H26 | 0.0021131206791  |
| C7  | H26 | 7.603954531e-05  |
| C8  | H26 | 0.960123079      |
| C9  | H26 | 0.00011470960434 |
| C1  | H26 | 0.0069779479429  |
| H11 | H26 | 0.00083027041486 |
| H12 | H26 | 3.3281518285e-05 |
| H13 | H26 | 1.7766328727e-05 |
| H14 | H26 | 0.011369841098   |
| H15 | H26 | 0.0034180292864  |
| H16 | H26 | 0.00015060137522 |
| H17 | H26 | 2.4502644942e-05 |
| H18 | H26 | 0.00027193043135 |

|     |     |                  |
|-----|-----|------------------|
| H19 | H26 | 0.0033780428633  |
| Si2 | H26 | 0.00013335480153 |
| H21 | H26 | 1.8353086413e-05 |
| H22 | H26 | 2.9212994083e-06 |
| H23 | H26 | 0.00020624052547 |
| H24 | H26 | 0.044320712798   |
| H25 | H26 | 0.044882805807   |
| C1  | H27 | 0.0017552722443  |
| Si2 | H27 | 0.0043593732675  |
| C3  | H27 | 0.00065440463109 |
| C4  | H27 | 0.00093340208629 |
| C5  | H27 | 0.05119370378    |
| C6  | H27 | 0.00027031602909 |
| C7  | H27 | 0.00029052979335 |
| C8  | H27 | 8.2046911128e-05 |
| C9  | H27 | 0.96376116697    |
| C1  | H27 | 3.3734095929e-05 |
| H11 | H27 | 3.8319592654e-05 |
| H12 | H27 | 2.4137237545e-05 |
| H13 | H27 | 0.00011957446473 |
| H14 | H27 | 0.00078548642218 |
| H15 | H27 | 6.5841713098e-05 |
| H16 | H27 | 0.0044111991249  |
| H17 | H27 | 0.0042890570341  |
| H18 | H27 | 9.1928612186e-06 |
| H19 | H27 | 1.0751395817e-05 |
| Si2 | H27 | 9.6304612074e-05 |
| H21 | H27 | 5.6673253842e-05 |
| H22 | H27 | 0.00059967435022 |
| H23 | H27 | 7.4818386202e-05 |
| H24 | H27 | 3.7717010494e-06 |
| H25 | H27 | 0.00024239526859 |
| H26 | H27 | 7.7811732631e-06 |
| C1  | H28 | 0.00031900490016 |
| Si2 | H28 | 0.0010970439378  |
| C3  | H28 | 0.00024870298849 |
| C4  | H28 | 0.0063628218109  |
| C5  | H28 | 0.044981866071   |
| C6  | H28 | 3.26573069e-05   |
| C7  | H28 | 0.00014055400529 |
| C8  | H28 | 0.0036621014058  |
| C9  | H28 | 0.95871920793    |
| C1  | H28 | 2.5465343653e-05 |
| H11 | H28 | 0.00010629733004 |
| H12 | H28 | 6.3019949578e-05 |
| H13 | H28 | 1.7311686435e-05 |
| H14 | H28 | 0.0063346517008  |
| H15 | H28 | 0.00080680241014 |



|     |     |                  |
|-----|-----|------------------|
| H16 | H28 | 0.0033458966186  |
| H17 | H28 | 0.011577120794   |
| H18 | H28 | 1.755419141e-06  |
| H19 | H28 | 1.2412058396e-05 |
| Si2 | H28 | 1.0448888117e-05 |
| H21 | H28 | 1.5556014095e-05 |
| H22 | H28 | 0.00048044830957 |
| H23 | H28 | 5.2751596513e-05 |
| H24 | H28 | 0.0002270374315  |
| H25 | H28 | 0.0063520136816  |
| H26 | H28 | 0.00041179798205 |
| H27 | H28 | 0.044297743374   |
| C1  | H29 | 0.0003388770735  |
| Si2 | H29 | 0.00098542620601 |
| C3  | H29 | 0.0011186970072  |
| C4  | H29 | 0.0007060966359  |
| C5  | H29 | 0.045316903255   |
| C6  | H29 | 3.481576936e-05  |
| C7  | H29 | 0.0082929808696  |
| C8  | H29 | 0.00012470923068 |
| C9  | H29 | 0.95841417558    |
| C1  | H29 | 0.00013978926643 |
| H11 | H29 | 2.7885116646e-05 |
| H12 | H29 | 6.4613845434e-05 |
| H13 | H29 | 0.00016035901235 |
| H14 | H29 | 0.00076769637771 |
| H15 | H29 | 5.6758305708e-05 |
| H16 | H29 | 0.011574825629   |
| H17 | H29 | 0.0033041740926  |
| H18 | H29 | 7.0099437095e-06 |
| H19 | H29 | 1.9455485322e-06 |
| Si2 | H29 | 9.5306206671e-06 |
| H21 | H29 | 0.0011452573194  |
| H22 | H29 | 0.014526995847   |
| H23 | H29 | 0.0011281780435  |
| H24 | H29 | 7.6852622245e-06 |
| H25 | H29 | 0.00035184317753 |
| H26 | H29 | 3.4019400695e-05 |
| H27 | H29 | 0.044254692169   |
| H28 | H29 | 0.044662488728   |

## TRIMETHYLSILANOL

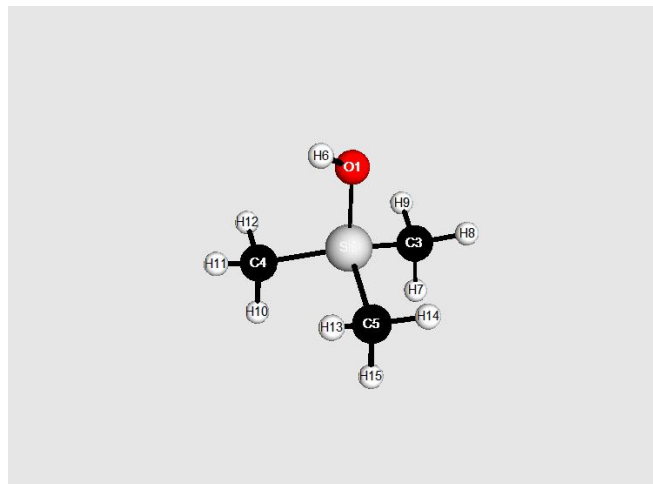

## HARTREE-FOCK

| Atom A | Atom B | Delocalization index |
|--------|--------|----------------------|
| O1     | Si2    | 0.34361318253        |
| O1     | C3     | 0.1017405242         |
| Si2    | C3     | 0.40060665872        |
| O1     | C4     | 0.1088321574         |
| Si2    | C4     | 0.39494604619        |
| C3     | C4     | 0.09462375403        |
| O1     | C5     | 0.10903853967        |
| Si2    | C5     | 0.39482842773        |
| C3     | C5     | 0.094539587188       |
| C4     | C5     | 0.099193623571       |
| O1     | H6     | 0.59552441591        |
| Si2    | H6     | 0.0052115484594      |
| C3     | H6     | 0.0054669189432      |
| C4     | H6     | 0.00093462724445     |
| C5     | H6     | 0.00095504539785     |
| O1     | H7     | 0.0078758648703      |
| Si2    | H7     | 0.012657400993       |
| C3     | H7     | 1.0146069408         |
| C4     | H7     | 0.0042854431485      |
| C5     | H7     | 0.0042648031715      |
| H6     | H7     | 0.00078534236717     |
| O1     | H8     | 0.0057935626655      |
| Si2    | H8     | 0.011999641558       |
| C3     | H8     | 1.0096738652         |
| C4     | H8     | 0.0082730189889      |
| C5     | H8     | 0.0044815323758      |
| H6     | H8     | 0.00012984124178     |
| H7     | H8     | 0.044288629728       |
| O1     | H9     | 0.005783623687       |
| Si2    | H9     | 0.012045800869       |

|     |     |                  |
|-----|-----|------------------|
| C3  | H9  | 1.0095791491     |
| C4  | H9  | 0.0044780605148  |
| C5  | H9  | 0.0082667522071  |
| H6  | H9  | 0.00013141013641 |
| H7  | H9  | 0.044293895727   |
| H8  | H9  | 0.04348231095    |
| O1  | O1  | 0.0095489933079  |
| Si2 | O1  | 0.012165658784   |
| C3  | O1  | 0.0041021714186  |
| C4  | O1  | 1.0123858129     |
| C5  | O1  | 0.0046470419946  |
| H6  | O1  | 7.2384637517e-05 |
| H7  | O1  | 0.0014115594639  |
| H8  | O1  | 0.00034804771231 |
| H9  | O1  | 0.00021115553391 |
| O1  | H11 | 0.0054356487345  |
| Si2 | H11 | 0.012236958      |
| C3  | H11 | 0.0084832870798  |
| C4  | H11 | 1.0128076598     |
| C5  | H11 | 0.0049063203632  |
| H6  | H11 | 0.00023716916759 |
| H7  | H11 | 0.00037334197512 |
| H8  | H11 | 0.0013337232457  |
| H9  | H11 | 0.00035761757687 |
| O1  | H11 | 0.045401470771   |
| O1  | H12 | 0.005706092969   |
| Si2 | H12 | 0.011761782167   |
| C3  | H12 | 0.0046104358001  |
| C4  | H12 | 1.0097399298     |
| C5  | H12 | 0.008621084036   |
| H6  | H12 | 3.5431242137e-05 |
| H7  | H12 | 0.00021586657635 |
| H8  | H12 | 0.00037599954621 |
| H9  | H12 | 0.0016142305815  |
| O1  | H12 | 0.044340161689   |
| H11 | H12 | 0.044700628595   |
| O1  | H13 | 0.0054513868636  |
| Si2 | H13 | 0.012243994372   |
| C3  | H13 | 0.0084768200517  |
| C4  | H13 | 0.0049032434933  |
| C5  | H13 | 1.0127911288     |
| H6  | H13 | 0.00025042095504 |
| H7  | H13 | 0.00037098777169 |
| H8  | H13 | 0.00035836608511 |
| H9  | H13 | 0.0013326335859  |
| O1  | H13 | 0.00024255672176 |
| H11 | H13 | 0.0018149776138  |
| H12 | H13 | 0.00039872089412 |

|     |     |                  |
|-----|-----|------------------|
| O1  | H14 | 0.0057137812469  |
| Si2 | H14 | 0.011704453122   |
| C3  | H14 | 0.0046061071205  |
| C4  | H14 | 0.0086244625519  |
| C5  | H14 | 1.0097727164     |
| H6  | H14 | 3.5698395489e-05 |
| H7  | H14 | 0.00021491124071 |
| H8  | H14 | 0.0016173887598  |
| H9  | H14 | 0.00037557807418 |
| O1  | H14 | 0.00039507833836 |
| H11 | H14 | 0.0003994824302  |
| H12 | H14 | 0.0013747037874  |
| H13 | H14 | 0.044709224656   |
| O1  | H15 | 0.0095641258292  |
| Si2 | H15 | 0.012183823555   |
| C3  | H15 | 0.0040914212497  |
| C4  | H15 | 0.0046610328776  |
| C5  | H15 | 1.0123237627     |
| H6  | H15 | 7.4410587602e-05 |
| H7  | H15 | 0.0013999160288  |
| H8  | H15 | 0.00021062657028 |
| H9  | H15 | 0.00034751393898 |
| O1  | H15 | 0.0017243646423  |
| H11 | H15 | 0.0002427942092  |
| H12 | H15 | 0.00039645704802 |
| H13 | H15 | 0.045406080089   |
| H14 | H15 | 0.044337471247   |

# SULFIDES AND THIOLS

## DIETHYL SULFIDE

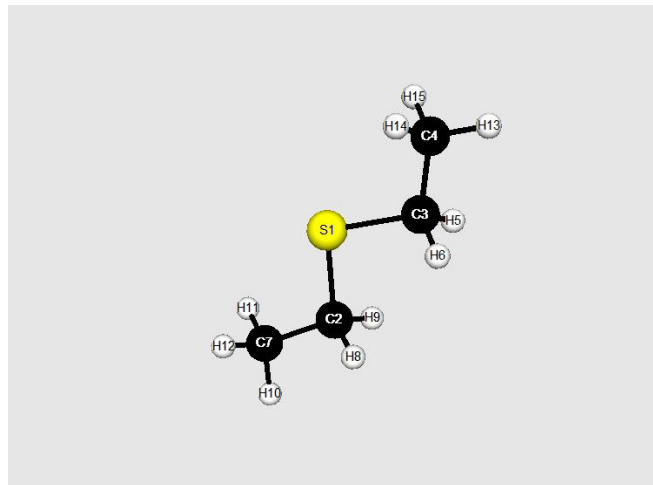

### HARTREE-FOCK

| Atom A | Atom B | Delocalization index |
|--------|--------|----------------------|
| S1     | C2     | 1.0691261898         |
| S1     | C3     | 1.0691697384         |
| C2     | C3     | 0.039822776304       |
| S1     | C4     | 0.062792501631       |
| C2     | C4     | 0.0092623503814      |
| C3     | C4     | 0.98882494835        |
| S1     | H5     | 0.062739739735       |
| C2     | H5     | 0.0059426037674      |
| C3     | H5     | 0.95110674608        |
| C4     | H5     | 0.038889273136       |
| S1     | H6     | 0.062669797676       |
| C2     | H6     | 0.0059471891864      |
| C3     | H6     | 0.95105900351        |
| C4     | H6     | 0.038855792705       |
| H5     | H6     | 0.038407520921       |
| S1     | C7     | 0.062913971416       |
| C2     | C7     | 0.98883631751        |
| C3     | C7     | 0.0092763254654      |
| C4     | C7     | 0.0016078543179      |
| H5     | C7     | 0.00075323978102     |
| H6     | C7     | 0.00075354525808     |
| S1     | H8     | 0.062682745163       |
| C2     | H8     | 0.95090437815        |
| C3     | H8     | 0.0059550549198      |
| C4     | H8     | 0.00075294188417     |
| H5     | H8     | 0.00041134533349     |
| H6     | H8     | 0.0053264602367      |
| C7     | H8     | 0.038891707126       |

|     |     |                  |
|-----|-----|------------------|
| S1  | H9  | 0.062748386703   |
| C2  | H9  | 0.9508612708     |
| C3  | H9  | 0.0059556766728  |
| C4  | H9  | 0.00075264656297 |
| H5  | H9  | 0.0053262864599  |
| H6  | H9  | 0.00041139132091 |
| C7  | H9  | 0.038887079298   |
| H8  | H9  | 0.038437164598   |
| S1  | S1  | 0.014856246685   |
| C2  | S1  | 0.04490072306    |
| C3  | S1  | 0.0022995645525  |
| C4  | S1  | 0.00049841301806 |
| H5  | S1  | 5.9983078731e-05 |
| H6  | S1  | 5.9984865146e-05 |
| C7  | S1  | 0.9633810897     |
| H8  | S1  | 0.003575548747   |
| H9  | S1  | 0.0035754744166  |
| S1  | H11 | 0.015818459769   |
| C2  | H11 | 0.043144028923   |
| C3  | H11 | 0.00095474079343 |
| C4  | H11 | 6.8933325253e-05 |
| H5  | H11 | 5.2260465828e-05 |
| H6  | H11 | 0.00037058459223 |
| C7  | H11 | 0.96064976131    |
| H8  | H11 | 0.01093694603    |
| H9  | H11 | 0.0033960174047  |
| S1  | H11 | 0.041695085595   |
| S1  | H12 | 0.015821173399   |
| C2  | H12 | 0.043190511962   |
| C3  | H12 | 0.00095473230624 |
| C4  | H12 | 6.8945476463e-05 |
| H5  | H12 | 0.00037058490184 |
| H6  | H12 | 5.2266917196e-05 |
| C7  | H12 | 0.96063957889    |
| H8  | H12 | 0.0033960890562  |
| H9  | H12 | 0.010936924866   |
| S1  | H12 | 0.041694664442   |
| H11 | H12 | 0.041669852505   |
| S1  | H13 | 0.014857266393   |
| C2  | H13 | 0.0022987607863  |
| C3  | H13 | 0.044938624096   |
| C4  | H13 | 0.96327878172    |
| H5  | H13 | 0.0035714958661  |
| H6  | H13 | 0.0035715966991  |
| C7  | H13 | 0.0004989427414  |
| H8  | H13 | 5.9953306423e-05 |
| H9  | H13 | 5.9952949688e-05 |
| S1  | H13 | 0.00021909692718 |

|     |     |                  |
|-----|-----|------------------|
| H11 | H13 | 2.9765967641e-05 |
| H12 | H13 | 2.9766406231e-05 |
| S1  | H14 | 0.015829480264   |
| C2  | H14 | 0.00095465930229 |
| C3  | H14 | 0.043155322866   |
| C4  | H14 | 0.9605420442     |
| H5  | H14 | 0.010930890725   |
| H6  | H14 | 0.0033953868014  |
| C7  | H14 | 6.9101162569e-05 |
| H8  | H14 | 5.2343496126e-05 |
| H9  | H14 | 0.00037082234456 |
| S1  | H14 | 2.9784292206e-05 |
| H11 | H14 | 8.03620828e-06   |
| H12 | H14 | 2.5372810493e-05 |
| H13 | H14 | 0.041692879885   |
| S1  | H15 | 0.015826698453   |
| C2  | H15 | 0.00095479425998 |
| C3  | H15 | 0.043239005098   |
| C4  | H15 | 0.96053225561    |
| H5  | H15 | 0.0033953455721  |
| H6  | H15 | 0.010930900884   |
| C7  | H15 | 6.9107911479e-05 |
| H8  | H15 | 0.00037082058911 |
| H9  | H15 | 5.2340737451e-05 |
| S1  | H15 | 2.9783566597e-05 |
| H11 | H15 | 2.5371927163e-05 |
| H12 | H15 | 8.0363087517e-06 |
| H13 | H15 | 0.041692670726   |
| H14 | H15 | 0.041665189084   |

#### CCSD

| Atom A | Atom B | Delocalization index |
|--------|--------|----------------------|
| C1     | S2     | 0.8835902305         |
| C1     | C3     | 0.84813505651        |
| S2     | C3     | 0.055073181017       |
| C1     | C4     | 0.034861118441       |
| S2     | C4     | 0.88360943792        |
| C3     | C4     | 0.0071277021192      |
| C1     | C5     | 0.0071310542925      |
| S2     | C5     | 0.055097849319       |
| C3     | C5     | 0.0013735250946      |
| C4     | C5     | 0.84815667508        |
| C1     | H6     | 0.81371004461        |
| S2     | H6     | 0.049631204927       |
| C3     | H6     | 0.031949431365       |
| C4     | H6     | 0.0061120093334      |
| C5     | H6     | 0.00069671567409     |
| C1     | H7     | 0.81352912399        |

|    |     |                  |
|----|-----|------------------|
| S2 | H7  | 0.049660062367   |
| C3 | H7  | 0.031953625352   |
| C4 | H7  | 0.0061092313506  |
| C5 | H7  | 0.00069600641902 |
| H6 | H7  | 0.030516654777   |
| C1 | H8  | 0.035339497874   |
| S2 | H8  | 0.011554103418   |
| C3 | H8  | 0.82878297942    |
| C4 | H8  | 0.0018881610874  |
| C5 | H8  | 0.00045074633737 |
| H6 | H8  | 0.0031532635124  |
| H7 | H8  | 0.0031535566427  |
| C1 | H9  | 0.03422736866    |
| S2 | H9  | 0.016056989076   |
| C3 | H9  | 0.8255043696     |
| C4 | H9  | 0.00083195985999 |
| C5 | H9  | 7.611972875e-05  |
| H6 | H9  | 0.0088218670501  |
| H7 | H9  | 0.0030049610763  |
| H8 | H9  | 0.032699195078   |
| C1 | C1  | 0.034247052755   |
| S2 | C1  | 0.016059114623   |
| C3 | C1  | 0.82552971989    |
| C4 | C1  | 0.00083191380744 |
| C5 | C1  | 7.6057427823e-05 |
| H6 | C1  | 0.0030047597642  |
| H7 | C1  | 0.0088219302013  |
| H8 | C1  | 0.032698808319   |
| H9 | C1  | 0.032851335491   |
| C1 | H11 | 0.0060995608477  |
| S2 | H11 | 0.049662514341   |
| C3 | H11 | 0.00069582937012 |
| C4 | H11 | 0.81369745504    |
| C5 | H11 | 0.031956206341   |
| H6 | H11 | 0.00050377565587 |
| H7 | H11 | 0.0068279686481  |
| H8 | H11 | 6.9808213526e-05 |
| H9 | H11 | 6.489014309e-05  |
| C1 | H11 | 0.00039635643308 |
| C1 | H12 | 0.0061156130366  |
| S2 | H12 | 0.049620238546   |
| C3 | H12 | 0.00069585280902 |
| C4 | H12 | 0.81339797528    |
| C5 | H12 | 0.031953312895   |
| H6 | H12 | 0.0068369585005  |
| H7 | H12 | 0.00050375882591 |
| H8 | H12 | 6.9786194295e-05 |
| H9 | H12 | 0.00039645931499 |



|     |     |                  |
|-----|-----|------------------|
| C1  | H12 | 6.4899502631e-05 |
| H11 | H12 | 0.030516580156   |
| C1  | H13 | 0.0018882781715  |
| S2  | H13 | 0.011554107103   |
| C3  | H13 | 0.00045063555433 |
| C4  | H13 | 0.035339131726   |
| C5  | H13 | 0.82882117283    |
| H6  | H13 | 6.9789883347e-05 |
| H7  | H13 | 6.9810149338e-05 |
| H8  | H13 | 0.00022753757474 |
| H9  | H13 | 3.3763175979e-05 |
| C1  | H13 | 3.3737891925e-05 |
| H11 | H13 | 0.0031536248956  |
| H12 | H13 | 0.0031534571484  |
| C1  | H14 | 0.00083129082667 |
| S2  | H14 | 0.016059433775   |
| C3  | H14 | 7.6030738781e-05 |
| C4  | H14 | 0.034264282756   |
| C5  | H14 | 0.82549363341    |
| H6  | H14 | 6.4909978701e-05 |
| H7  | H14 | 0.00039638723681 |
| H8  | H14 | 3.373879275e-05  |
| H9  | H14 | 1.3757287131e-05 |
| C1  | H14 | 3.651331149e-05  |
| H11 | H14 | 0.0088218551957  |
| H12 | H14 | 0.0030047602169  |
| H13 | H14 | 0.032698850449   |
| C1  | H15 | 0.00083204635837 |
| S2  | H15 | 0.016055964515   |
| C3  | H15 | 7.6035791726e-05 |
| C4  | H15 | 0.034269808445   |
| C5  | H15 | 0.82553785531    |
| H6  | H15 | 0.00039648143152 |
| H7  | H15 | 6.4888230218e-05 |
| H8  | H15 | 3.3760714086e-05 |
| H9  | H15 | 3.6503673251e-05 |
| C1  | H15 | 1.3754466764e-05 |
| H11 | H15 | 0.0030044269877  |
| H12 | H15 | 0.0088216750453  |
| H13 | H15 | 0.032699031092   |
| H14 | H15 | 0.032850831504   |

## ETHYL METHYL SULFIDE

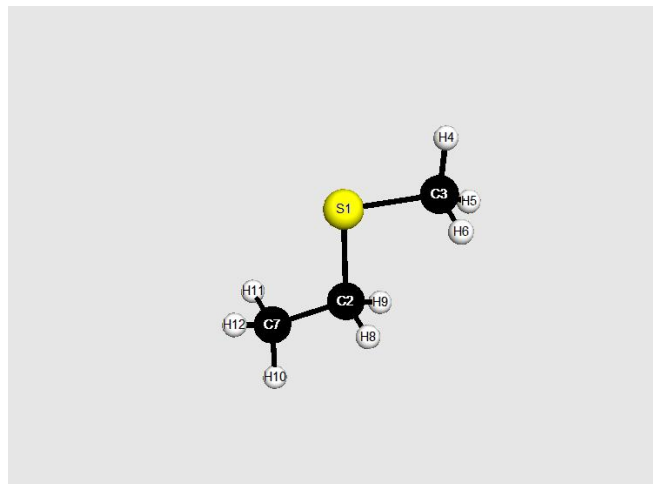

### HARTREE-FOCK

| Atom A | Atom B | Delocalization index |
|--------|--------|----------------------|
| S1     | C2     | 1.0695989597         |
| S1     | C3     | 1.0977927429         |
| C2     | C3     | 0.042544034274       |
| S1     | H4     | 0.051893601404       |
| C2     | H4     | 0.0099870965722      |
| C3     | H4     | 0.96640432894        |
| S1     | H5     | 0.063335092404       |
| C2     | H5     | 0.0055302664603      |
| C3     | H5     | 0.96366314781        |
| H4     | H5     | 0.037806449575       |
| S1     | H6     | 0.06318792288        |
| C2     | H6     | 0.0055261470552      |
| C3     | H6     | 0.96361087973        |
| H4     | H6     | 0.03780707591        |
| H5     | H6     | 0.038622422167       |
| S1     | C7     | 0.062567027639       |
| C2     | C7     | 0.98903760995        |
| C3     | C7     | 0.0096308870552      |
| H4     | C7     | 0.0018667183049      |
| H5     | C7     | 0.0007069920768      |
| H6     | C7     | 0.00070696511519     |
| S1     | H8     | 0.0629732603         |
| C2     | H8     | 0.9508972735         |
| C3     | H8     | 0.0062353761657      |
| H4     | H8     | 0.00070258415609     |
| H5     | H8     | 0.00038971685393     |
| H6     | H8     | 0.0047196919004      |
| C7     | H8     | 0.038812151555       |
| S1     | H9     | 0.063131265625       |
| C2     | H9     | 0.9509105002         |

|     |     |                  |
|-----|-----|------------------|
| C3  | H9  | 0.0062380895316  |
| H4  | H9  | 0.00070259975709 |
| H5  | H9  | 0.0047199190065  |
| H6  | H9  | 0.00038970883276 |
| C7  | H9  | 0.038820943231   |
| H8  | H9  | 0.038406503696   |
| S1  | S1  | 0.014877463861   |
| C2  | S1  | 0.044899616741   |
| C3  | S1  | 0.0024012106414  |
| H4  | S1  | 0.0005871873098  |
| H5  | S1  | 7.8529279355e-05 |
| H6  | S1  | 7.8528289384e-05 |
| C7  | S1  | 0.96331479415    |
| H8  | S1  | 0.00356260621    |
| H9  | S1  | 0.003562503369   |
| S1  | H11 | 0.015771864144   |
| C2  | H11 | 0.043200519314   |
| C3  | H11 | 0.00097688914532 |
| H4  | H11 | 6.310888637e-05  |
| H5  | H11 | 5.3338247681e-05 |
| H6  | H11 | 0.00036340700666 |
| C7  | H11 | 0.96045667808    |
| H8  | H11 | 0.010948247772   |
| H9  | H11 | 0.0033931158744  |
| S1  | H11 | 0.041657113836   |
| S1  | H12 | 0.015778112797   |
| C2  | H12 | 0.043186274529   |
| C3  | H12 | 0.00097705687858 |
| H4  | H12 | 6.3108561762e-05 |
| H5  | H12 | 0.00036341874703 |
| H6  | H12 | 5.3336089805e-05 |
| C7  | H12 | 0.96045326943    |
| H8  | H12 | 0.0033930623049  |
| H9  | H12 | 0.010948274962   |
| S1  | H12 | 0.041657379452   |
| H11 | H12 | 0.041637293722   |

## DIMETHYL SULFIDE

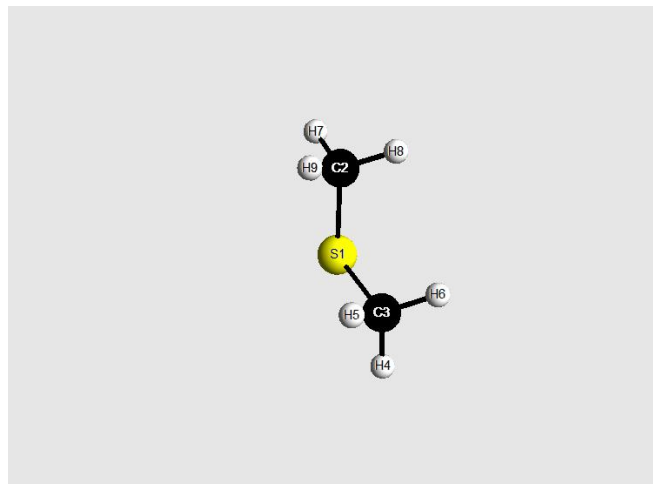

### HARTREE-FOCK

| Atom A | Atom B | Delocalization index |
|--------|--------|----------------------|
| S1     | C2     | 1.0987956412         |
| S1     | C3     | 1.0984255384         |
| C2     | C3     | 0.045455094233       |
| S1     | H4     | 0.051705732941       |
| C2     | H4     | 0.010399564633       |
| C3     | H4     | 0.96653848021        |
| S1     | H5     | 0.063612192557       |
| C2     | H5     | 0.0057802482377      |
| C3     | H5     | 0.96373542001        |
| H4     | H5     | 0.037734715992       |
| S1     | H6     | 0.063545670739       |
| C2     | H6     | 0.0057866591541      |
| C3     | H6     | 0.96378072493        |
| H4     | H6     | 0.037734428929       |
| H5     | H6     | 0.038581220969       |
| S1     | H7     | 0.051692073491       |
| C2     | H7     | 0.96658256308        |
| C3     | H7     | 0.010414574929       |
| H4     | H7     | 0.0021727519225      |
| H5     | H7     | 0.0006453398871      |
| H6     | H7     | 0.00064536902029     |
| S1     | H8     | 0.063555922206       |
| C2     | H8     | 0.96367641272        |
| C3     | H8     | 0.0057878390665      |
| H4     | H8     | 0.00064493586674     |
| H5     | H8     | 0.00037230926374     |
| H6     | H8     | 0.0041798893838      |
| H7     | H8     | 0.037731978809       |
| S1     | H9     | 0.063618218697       |
| C2     | H9     | 0.96364387301        |

|    |    |                  |
|----|----|------------------|
| C3 | H9 | 0.0057820507751  |
| H4 | H9 | 0.00064489369923 |
| H5 | H9 | 0.0041797712124  |
| H6 | H9 | 0.00037230309012 |
| H7 | H9 | 0.037731649092   |
| H8 | H9 | 0.038591143314   |

#### CCSD

| Atom A | Atom B | Delocalization index |
|--------|--------|----------------------|
| C1     | S2     | 0.9102284214         |
| C1     | C3     | 0.0399747137         |
| S2     | C3     | 0.91010391568        |
| C1     | H4     | 0.8263115476         |
| S2     | H4     | 0.05018986887        |
| C3     | H4     | 0.0060063480162      |
| C1     | H5     | 0.82621881053        |
| S2     | H5     | 0.050163269929       |
| C3     | H5     | 0.0060160695706      |
| H4     | H5     | 0.030787550385       |
| C1     | H6     | 0.83076167475        |
| S2     | H6     | 0.04153807182        |
| C3     | H6     | 0.0080104528242      |
| H4     | H6     | 0.030187984956       |
| H5     | H6     | 0.030186909738       |
| C1     | H7     | 0.0080130553034      |
| S2     | H7     | 0.041537385742       |
| C3     | H7     | 0.83073870626        |
| H4     | H7     | 0.00063349605688     |
| H5     | H7     | 0.00063380843999     |
| H6     | H7     | 0.00201420665        |
| C1     | H8     | 0.0060233875948      |
| S2     | H8     | 0.050153960035       |
| C3     | H8     | 0.82617996388        |
| H4     | H8     | 0.00046299233102     |
| H5     | H8     | 0.0054520974081      |
| H6     | H8     | 0.0006337800256      |
| H7     | H8     | 0.030187378011       |
| C1     | H9     | 0.0060111660928      |
| S2     | H9     | 0.050192625957       |
| C3     | H9     | 0.82624249774        |
| H4     | H9     | 0.0054430199711      |
| H5     | H9     | 0.00046297357789     |
| H6     | H9     | 0.00063343790912     |
| H7     | H9     | 0.030188237752       |
| H8     | H9     | 0.030787419234       |

## METHANETHIOL

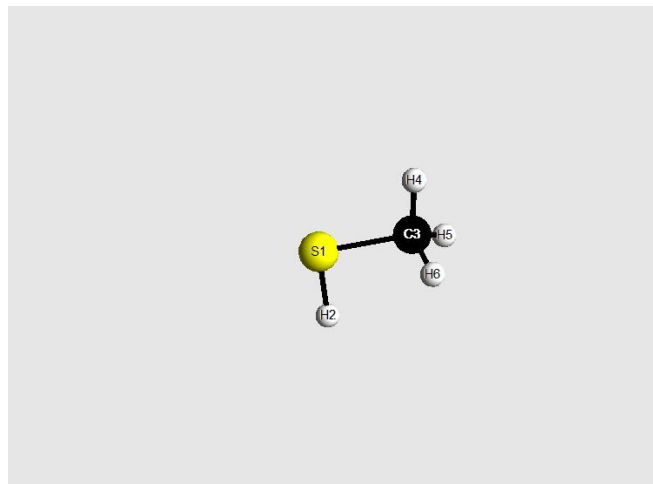

### HARTREE-FOCK

| Atom A | Atom B | Delocalization index |
|--------|--------|----------------------|
| S1     | H2     | 1.1390621143         |
| S1     | C3     | 1.0958467432         |
| H2     | C3     | 0.047721891778       |
| S1     | H4     | 0.053365422588       |
| H2     | H4     | 0.010934869712       |
| C3     | H4     | 0.96647380836        |
| S1     | H5     | 0.063847099967       |
| H2     | H5     | 0.0033624209674      |
| C3     | H5     | 0.96671608386        |
| H4     | H5     | 0.037543887438       |
| S1     | H6     | 0.06384726592        |
| H2     | H6     | 0.0033624643334      |
| C3     | H6     | 0.96675343062        |
| H4     | H6     | 0.037543541537       |
| H5     | H6     | 0.037409395135       |

### CCSD

| Atom A | Atom B | Delocalization index |
|--------|--------|----------------------|
| S1     | H2     | 0.9499299577         |
| S1     | C3     | 0.91058130129        |
| H2     | C3     | 0.038202230941       |
| S1     | H4     | 0.043036501623       |
| H2     | H4     | 0.0084575479802      |
| C3     | H4     | 0.83048067012        |
| S1     | H5     | 0.050369040122       |
| H2     | H5     | 0.0030980847059      |
| C3     | H5     | 0.83057319103        |
| H4     | H5     | 0.030155636269       |
| S1     | H6     | 0.050367977612       |
| H2     | H6     | 0.0030981895208      |

|    |    |                |
|----|----|----------------|
| C3 | H6 | 0.83055218267  |
| H4 | H6 | 0.030155771211 |
| H5 | H6 | 0.0299360601   |

## ETHANETHIOL

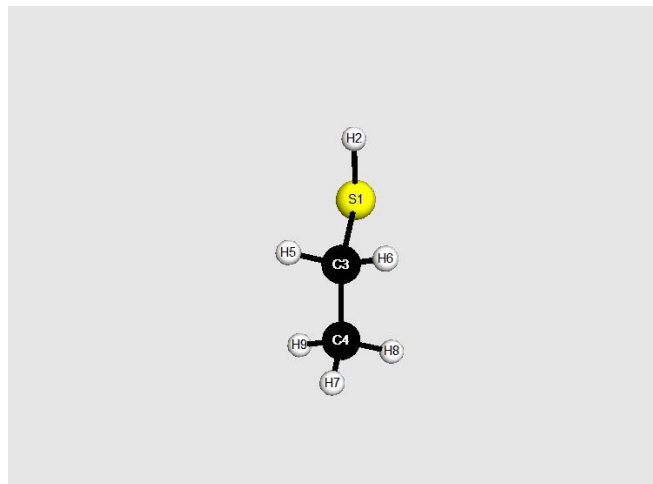

### HARTREE-FOCK

| Atom A | Atom B | Delocalization index |
|--------|--------|----------------------|
| S1     | H2     | 1.1389041101         |
| S1     | C3     | 1.0646112432         |
| H2     | C3     | 0.045003921391       |
| S1     | C4     | 0.064801573625       |
| H2     | C4     | 0.010379294479       |
| C3     | C4     | 0.98993091974        |
| S1     | H5     | 0.063762029496       |
| H2     | H5     | 0.0034074271371      |
| C3     | H5     | 0.9547741766         |
| C4     | H5     | 0.038632103089       |
| S1     | H6     | 0.063748475728       |
| H2     | H6     | 0.0034074631029      |
| C3     | H6     | 0.95484836402        |
| C4     | H6     | 0.038669110497       |
| H5     | H6     | 0.037253230326       |
| S1     | H7     | 0.015511247943       |
| H2     | H7     | 0.0027107160159      |
| C3     | H7     | 0.044953613151       |
| C4     | H7     | 0.96256383851        |
| H5     | H7     | 0.0034711944074      |
| H6     | H7     | 0.0034712289825      |
| S1     | H8     | 0.015755793312       |
| H2     | H8     | 0.0010255361294      |
| C3     | H8     | 0.04356644777        |
| C4     | H8     | 0.96018242076        |
| H5     | H8     | 0.010968579917       |
| H6     | H8     | 0.0033954034339      |
| H7     | H8     | 0.04133318092        |
| S1     | H9     | 0.01575460639        |
| H2     | H9     | 0.0010255002993      |



|    |    |                 |
|----|----|-----------------|
| C3 | H9 | 0.043339754134  |
| C4 | H9 | 0.96032804439   |
| H5 | H9 | 0.0033953793643 |
| H6 | H9 | 0.010968578616  |
| H7 | H9 | 0.041333122536  |
| H8 | H9 | 0.041494749528  |

### CCSD

| Atom A | Atom B | Delocalization index |
|--------|--------|----------------------|
| S1     | H2     | 0.94888342579        |
| S1     | C3     | 0.8827733683         |
| H2     | C3     | 0.035851736767       |
| S1     | C4     | 0.057466691678       |
| H2     | C4     | 0.0080144668538      |
| C3     | C4     | 0.85056377411        |
| S1     | H5     | 0.050584329123       |
| H2     | H5     | 0.0032124975181      |
| C3     | H5     | 0.81822725447        |
| C4     | H5     | 0.032075814153       |
| S1     | H6     | 0.050584910076       |
| H2     | H6     | 0.0032125671547      |
| C3     | H6     | 0.81819569126        |
| C4     | H6     | 0.032003942487       |
| H5     | H6     | 0.029685702453       |
| S1     | H7     | 0.012161371756       |
| H2     | H7     | 0.0023489688878      |
| C3     | H7     | 0.035162567756       |
| C4     | H7     | 0.8279677631         |
| H5     | H7     | 0.0030875744225      |
| H6     | H7     | 0.0030876584437      |
| S1     | H8     | 0.016172825173       |
| H2     | H8     | 0.00093964533534     |
| C3     | H8     | 0.034072297868       |
| C4     | H8     | 0.82471694637        |
| H5     | H8     | 0.0089187606432      |
| H6     | H8     | 0.0030134044448      |
| H7     | H8     | 0.032199293637       |
| S1     | H9     | 0.016173094731       |
| H2     | H9     | 0.00093964469399     |
| C3     | H9     | 0.034060731437       |
| C4     | H9     | 0.82469263417        |
| H5     | H9     | 0.0030133869634      |
| H6     | H9     | 0.0089187698381      |
| H7     | H9     | 0.032199282309       |
| H8     | H9     | 0.032524370983       |

# THIOPHENES

## 3-NITROTHIOPHENE

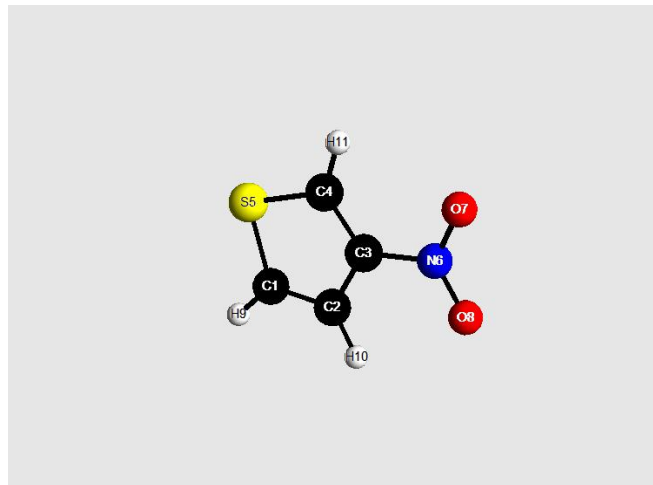

### HARTREE-FOCK

| Atom A | Atom B | Delocalization index |
|--------|--------|----------------------|
| C1     | C2     | 1.6148547204         |
| C1     | C3     | 0.095862234732       |
| C2     | C3     | 1.1460315131         |
| C1     | C4     | 0.13593378751        |
| C2     | C4     | 0.078119036608       |
| C3     | C4     | 1.5097144288         |
| C1     | S5     | 1.2395500208         |
| C2     | S5     | 0.13869751598        |
| C3     | S5     | 0.14600493022        |
| C4     | S5     | 1.2942434806         |
| C1     | N6     | 0.010580066457       |
| C2     | N6     | 0.051651219856       |
| C3     | N6     | 0.81309352327        |
| C4     | N6     | 0.086460813667       |
| S5     | N6     | 0.023410130496       |
| C1     | O7     | 0.0055793308664      |
| C2     | O7     | 0.013322285042       |
| C3     | O7     | 0.076234347086       |
| C4     | O7     | 0.049356762085       |
| S5     | O7     | 0.0082061710229      |
| N6     | O7     | 1.6780782093         |
| C1     | O8     | 0.0036207743738      |
| C2     | O8     | 0.033399374509       |
| C3     | O8     | 0.074957670092       |
| C4     | O8     | 0.027377927708       |
| S5     | O8     | 0.012039667887       |
| N6     | O8     | 1.6844806854         |
| O7     | O8     | 0.32233650428        |

|    |     |                  |
|----|-----|------------------|
| C1 | H9  | 0.97318219044    |
| C2 | H9  | 0.046601931901   |
| C3 | H9  | 0.0094658107617  |
| C4 | H9  | 0.012858890396   |
| S5 | H9  | 0.042576699756   |
| N6 | H9  | 0.0013728830902  |
| O7 | H9  | 0.00088187207309 |
| O8 | H9  | 0.00014292263233 |
| C1 | C1  | 0.04959582535    |
| C2 | C1  | 0.95094313548    |
| C3 | C1  | 0.034580919371   |
| C4 | C1  | 0.0072623888028  |
| S5 | C1  | 0.017038341311   |
| N6 | C1  | 0.0029358349495  |
| O7 | C1  | 0.0010649994965  |
| O8 | C1  | 0.019833780966   |
| H9 | C1  | 0.0036724017803  |
| C1 | H11 | 0.012207143392   |
| C2 | H11 | 0.0079871214825  |
| C3 | H11 | 0.039609654096   |
| C4 | H11 | 0.94642444401    |
| S5 | H11 | 0.037283902923   |
| N6 | H11 | 0.0043929018824  |
| O7 | H11 | 0.019336068126   |
| O8 | H11 | 0.0017090702392  |
| H9 | H11 | 0.0016388499589  |
| C1 | H11 | 0.0012262301221  |

### 3-LITHIUMTHIOPHENE

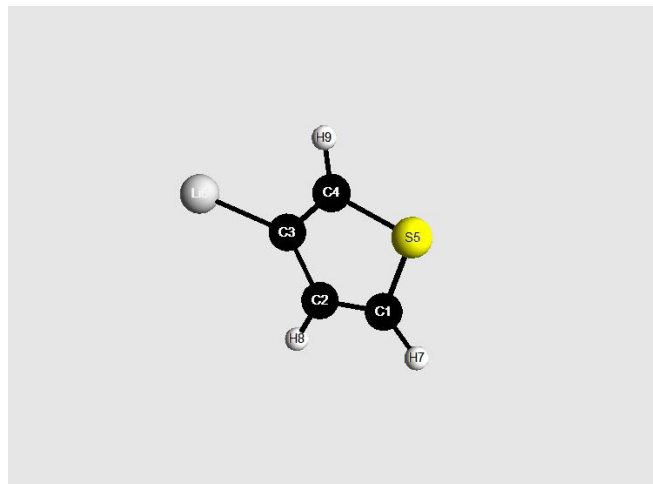

#### HARTREE-FOCK

| Atom A | Atom B | Delocalization index |
|--------|--------|----------------------|
| C1     | C2     | 1.6116376854         |
| C1     | C3     | 0.09100405615        |
| C2     | C3     | 1.1996533384         |
| C1     | C4     | 0.14098311648        |
| C2     | C4     | 0.11334184769        |
| C3     | C4     | 1.6782651095         |
| C1     | S5     | 1.2537309853         |
| C2     | S5     | 0.15916685444        |
| C3     | S5     | 0.1758307694         |
| C4     | S5     | 1.2170191803         |
| C1     | Li6    | 0.0017605583653      |
| C2     | Li6    | 0.0057308581805      |
| C3     | Li6    | 0.15416489738        |
| C4     | Li6    | 0.0096944508078      |
| S5     | Li6    | 0.0043782559857      |
| C1     | H7     | 0.98625237058        |
| C2     | H7     | 0.049798167785       |
| C3     | H7     | 0.012228053627       |
| C4     | H7     | 0.015441304072       |
| S5     | H7     | 0.046240097323       |
| Li6    | H7     | 0.00032639443659     |
| C1     | H8     | 0.066982405377       |
| C2     | H8     | 0.9810243548         |
| C3     | H8     | 0.045935919611       |
| C4     | H8     | 0.010390410538       |
| S5     | H8     | 0.022402430985       |
| Li6    | H8     | 0.00051497287951     |
| H7     | H8     | 0.0043772609423      |
| C1     | H9     | 0.015579949544       |
| C2     | H9     | 0.012535817856       |

|     |    |                  |
|-----|----|------------------|
| C3  | H9 | 0.060195444731   |
| C4  | H9 | 0.99169990708    |
| S5  | H9 | 0.053518912245   |
| Li6 | H9 | 0.00081627372622 |
| H7  | H9 | 0.0021626317645  |
| H8  | H9 | 0.0016457365092  |

## 2-NITROTHIOPHENE

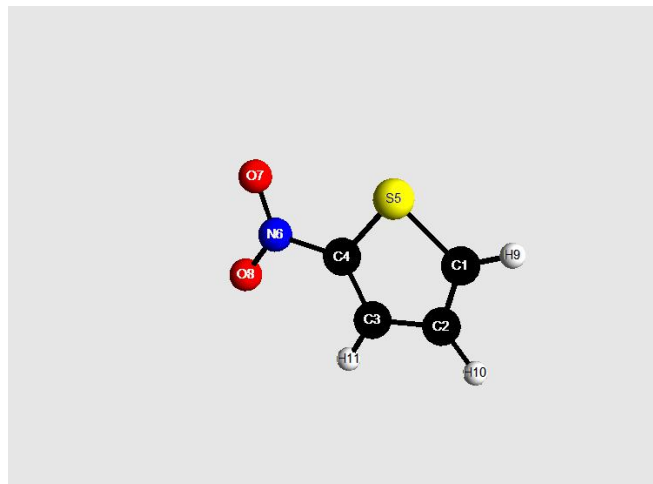

### HARTREE-FOCK

| Atom A | Atom B | Delocalization index |
|--------|--------|----------------------|
| C1     | C2     | 1.5795820332         |
| C1     | C3     | 0.089457462986       |
| C2     | C3     | 1.202086131          |
| C1     | C4     | 0.13719191003        |
| C2     | C4     | 0.089949233758       |
| C3     | C4     | 1.4953831633         |
| C1     | S5     | 1.2734543956         |
| C2     | S5     | 0.14110834724        |
| C3     | S5     | 0.14585301212        |
| C4     | S5     | 1.1956954155         |
| C1     | N6     | 0.020731136099       |
| C2     | N6     | 0.011503873242       |
| C3     | N6     | 0.076475626429       |
| C4     | N6     | 0.85253304407        |
| S5     | N6     | 0.056024109177       |
| C1     | O7     | 0.011643843153       |
| C2     | O7     | 0.0057258172638      |
| C3     | O7     | 0.02634787843        |
| C4     | O7     | 0.084535076446       |
| S5     | O7     | 0.057716925922       |
| N6     | O7     | 1.6753300364         |
| C1     | O8     | 0.011292498537       |
| C2     | O8     | 0.0039030912482      |
| C3     | O8     | 0.04531303461        |
| C4     | O8     | 0.081753634988       |
| S5     | O8     | 0.016965100583       |
| N6     | O8     | 1.6781651642         |
| O7     | O8     | 0.31850869033        |
| C1     | H9     | 0.97106450679        |
| C2     | H9     | 0.044438049387       |

|    |     |                  |
|----|-----|------------------|
| C3 | H9  | 0.0089328295545  |
| C4 | H9  | 0.012715624366   |
| S5 | H9  | 0.043180349314   |
| N6 | H9  | 0.0019674299294  |
| O7 | H9  | 0.00066167689496 |
| O8 | H9  | 0.0012381291986  |
| C1 | C1  | 0.054670150054   |
| C2 | C1  | 0.97158000125    |
| C3 | C1  | 0.039056712017   |
| C4 | C1  | 0.0082131496059  |
| S5 | C1  | 0.017893189658   |
| N6 | C1  | 0.0013121470565  |
| O7 | C1  | 0.00090364700595 |
| O8 | C1  | 0.00015544891929 |
| H9 | C1  | 0.0038286264808  |
| C1 | H11 | 0.0073717562231  |
| C2 | H11 | 0.032702309339   |
| C3 | H11 | 0.94726380739    |
| C4 | H11 | 0.048124060741   |
| S5 | H11 | 0.016082873928   |
| N6 | H11 | 0.0045811650071  |
| O7 | H11 | 0.0018071859927  |
| O8 | H11 | 0.019698043746   |
| H9 | H11 | 0.0012343231268  |
| C1 | H11 | 0.0026407767617  |

## 2-THIOPHENECARBALDEHYDE

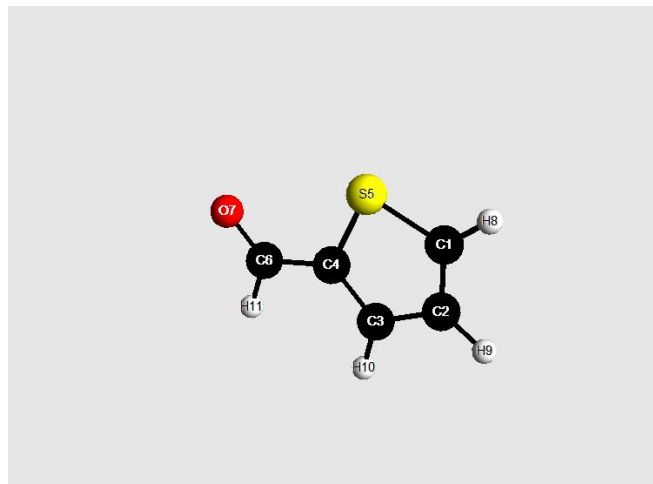

### HARTREE-FOCK

| Atom A | Atom B | Delocalization index |
|--------|--------|----------------------|
| C1     | C2     | 1.5807766434         |
| C1     | C3     | 0.091490448579       |
| C2     | C3     | 1.2066172983         |
| C1     | C4     | 0.13666412299        |
| C2     | C4     | 0.084930288332       |
| C3     | C4     | 1.5363778708         |
| C1     | S5     | 1.2780061532         |
| C2     | S5     | 0.14404013187        |
| C3     | S5     | 0.1492181984         |
| C4     | S5     | 1.214430649          |
| C1     | C6     | 0.019386300595       |
| C2     | C6     | 0.0097831561358      |
| C3     | C6     | 0.066171299748       |
| C4     | C6     | 1.0064252658         |
| S5     | C6     | 0.040622729916       |
| C1     | O7     | 0.015978948449       |
| C2     | O7     | 0.0063190402167      |
| C3     | O7     | 0.040292047534       |
| C4     | O7     | 0.13680917246        |
| S5     | O7     | 0.041527629874       |
| C6     | O7     | 1.2890327456         |
| C1     | H8     | 0.97418284487        |
| C2     | H8     | 0.045495575389       |
| C3     | H8     | 0.0092328080079      |
| C4     | H8     | 0.013203384869       |
| S5     | H8     | 0.043499140134       |
| C6     | H8     | 0.001904384702       |
| O7     | H8     | 0.0010284197973      |
| C1     | H9     | 0.055775892977       |
| C2     | H9     | 0.97486141898        |



|    |     |                  |
|----|-----|------------------|
| C3 | H9  | 0.039496102388   |
| C4 | H9  | 0.0084223211697  |
| S5 | H9  | 0.018464651896   |
| C6 | H9  | 0.001077293774   |
| O7 | H9  | 0.00088944023057 |
| H8 | H9  | 0.0038115303867  |
| C1 | C1  | 0.0081897418657  |
| C2 | C1  | 0.037278126716   |
| C3 | C1  | 0.96801466802    |
| C4 | C1  | 0.053052135603   |
| S5 | C1  | 0.019125481043   |
| C6 | C1  | 0.0071253906603  |
| O7 | C1  | 0.0026900863083  |
| H8 | C1  | 0.0013175085757  |
| H9 | C1  | 0.0027235682127  |
| C1 | H11 | 0.0020058978614  |
| C2 | H11 | 0.00090333692628 |
| C3 | H11 | 0.0099797995064  |
| C4 | H11 | 0.052734212743   |
| S5 | H11 | 0.010015409042   |
| C6 | H11 | 0.88479314259    |
| O7 | H11 | 0.11725350249    |
| H8 | H11 | 0.00050713843094 |
| H9 | H11 | 3.702649881e-05  |
| C1 | H11 | 0.0063554889298  |

# THIOPHENE

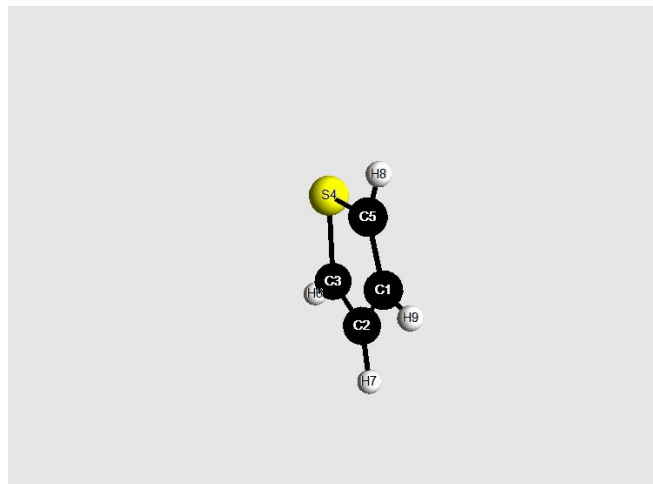

## HARTREE-FOCK

| Atom A | Atom B | Delocalization index |
|--------|--------|----------------------|
| C1     | C2     | 1.1834846095         |
| C1     | C3     | 0.090042302305       |
| C2     | C3     | 1.6075381749         |
| C1     | S4     | 0.15113656655        |
| C2     | S4     | 0.15113420937        |
| C3     | S4     | 1.2552166209         |
| C1     | C5     | 1.6075494702         |
| C2     | C5     | 0.090101626163       |
| C3     | C5     | 0.14435257075        |
| S4     | C5     | 1.2554197421         |
| C1     | H6     | 0.0097999577132      |
| C2     | H6     | 0.047388197092       |
| C3     | H6     | 0.97822022632        |
| S4     | H6     | 0.043916322057       |
| C5     | H6     | 0.014219679003       |
| C1     | H7     | 0.038325940184       |
| C2     | H7     | 0.97489657076        |
| C3     | H7     | 0.057577098057       |
| S4     | H7     | 0.019894098146       |
| C5     | H7     | 0.0085462870822      |
| H6     | H7     | 0.0039117258787      |
| C1     | H8     | 0.047393582257       |
| C2     | H8     | 0.0098012598391      |
| C3     | H8     | 0.014220724841       |
| S4     | H8     | 0.043917717843       |
| C5     | H8     | 0.97823497273        |
| H6     | H8     | 0.001903667208       |
| H7     | H8     | 0.0014097690696      |
| C1     | H9     | 0.97492768925        |
| C2     | H9     | 0.038337852308       |

|    |    |                 |
|----|----|-----------------|
| C3 | H9 | 0.0085455272658 |
| S4 | H9 | 0.019896738855  |
| C5 | H9 | 0.057572911074  |
| H6 | H9 | 0.0014102867798 |
| H7 | H9 | 0.0026990220947 |
| H8 | H9 | 0.0039117862017 |

### CCSD

| Atom A | Atom B | Delocalization index |
|--------|--------|----------------------|
| C1     | C2     | 1.0333815149         |
| C1     | C3     | 0.066460337304       |
| C2     | C3     | 1.2854139052         |
| C1     | S4     | 0.1056815296         |
| C2     | S4     | 0.1056999586         |
| C3     | S4     | 1.0430502007         |
| C1     | C5     | 1.2854125499         |
| C2     | C5     | 0.066492720032       |
| C3     | C5     | 0.099722903066       |
| S4     | C5     | 1.0430441016         |
| C1     | H6     | 0.0076220753053      |
| C2     | H6     | 0.034375876099       |
| C3     | H6     | 0.84502405444        |
| S4     | H6     | 0.034877614579       |
| C5     | H6     | 0.010422683588       |
| C1     | H7     | 0.029962761196       |
| C2     | H7     | 0.84265304443        |
| C3     | H7     | 0.040324623609       |
| S4     | H7     | 0.015334567526       |
| C5     | H7     | 0.0067819649655      |
| H6     | H7     | 0.0029816536941      |
| C1     | H8     | 0.034383410475       |
| C2     | H8     | 0.007622458691       |
| C3     | H8     | 0.010422431243       |
| S4     | H8     | 0.034878394141       |
| C5     | H8     | 0.84496835469        |
| H6     | H8     | 0.0017362286776      |
| H7     | H8     | 0.0013507209476      |
| C1     | H9     | 0.8426489805         |
| C2     | H9     | 0.029968915666       |
| C3     | H9     | 0.0067834453466      |
| S4     | H9     | 0.015335037728       |
| C5     | H9     | 0.040324180806       |
| H6     | H9     | 0.0013507424417      |
| H7     | H9     | 0.0023684977773      |
| H8     | H9     | 0.0029816690532      |

## 2-LITHIUMTHIOPHENE

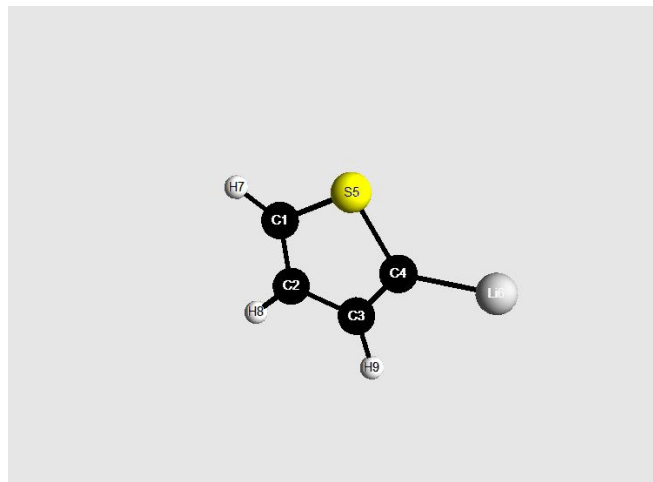

### HARTREE-FOCK

| Atom A | Atom B | Delocalization index |
|--------|--------|----------------------|
| C1     | C2     | 1.6014145428         |
| C1     | C3     | 0.093747795047       |
| C2     | C3     | 1.1911507022         |
| C1     | C4     | 0.15954069254        |
| C2     | C4     | 0.094721210302       |
| C3     | C4     | 1.6485466641         |
| C1     | S5     | 1.2530860456         |
| C2     | S5     | 0.15735315867        |
| C3     | S5     | 0.16512806607        |
| C4     | S5     | 1.307084824          |
| C1     | Li6    | 0.0032842059483      |
| C2     | Li6    | 0.0018856690802      |
| C3     | Li6    | 0.0077867019151      |
| C4     | Li6    | 0.14958271546        |
| S5     | Li6    | 0.0074140745189      |
| C1     | H7     | 0.98753855186        |
| C2     | H7     | 0.050380745451       |
| C3     | H7     | 0.011009069151       |
| C4     | H7     | 0.018844204143       |
| S5     | H7     | 0.044108831879       |
| Li6    | H7     | 0.00045536302005     |
| C1     | H8     | 0.060415586332       |
| C2     | H8     | 0.98105890729        |
| C3     | H8     | 0.039595558001       |
| C4     | H8     | 0.01083747151        |
| S5     | H8     | 0.021898416639       |
| Li6    | H8     | 0.00028981435409     |
| H7     | H8     | 0.0040401711617      |
| C1     | H9     | 0.0099056100056      |
| C2     | H9     | 0.045686493278       |

|     |    |                  |
|-----|----|------------------|
| C3  | H9 | 0.98684490181    |
| C4  | H9 | 0.068591067119   |
| S5  | H9 | 0.024798090605   |
| Li6 | H9 | 0.00077302496807 |
| H7  | H9 | 0.0015650445175  |
| H8  | H9 | 0.0031062166992  |

### 3-BROMOTHIOPHENE

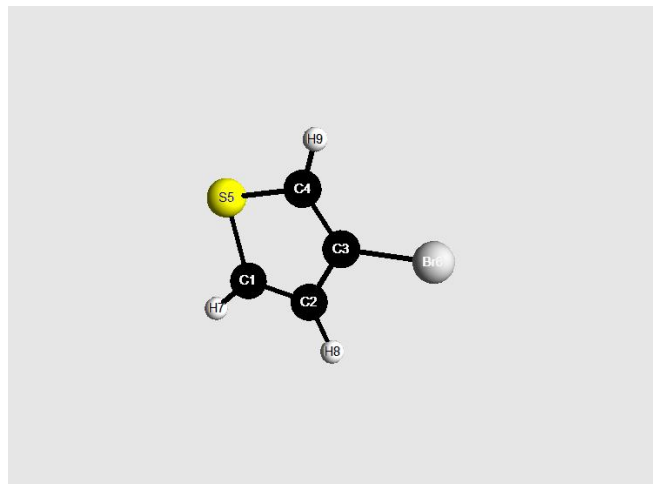

#### HARTREE-FOCK

| Atom A | Atom B | Delocalization index |
|--------|--------|----------------------|
| C1     | C2     | 1.6062173261         |
| C1     | C3     | 0.094571417482       |
| C2     | C3     | 1.1695797975         |
| C1     | C4     | 0.14052425355        |
| C2     | C4     | 0.079596609706       |
| C3     | C4     | 1.5916387945         |
| C1     | S5     | 1.2563218158         |
| C2     | S5     | 0.1469017919         |
| C3     | S5     | 0.15174706502        |
| C4     | S5     | 1.2460227376         |
| C1     | Br6    | 0.015628239494       |
| C2     | Br6    | 0.070478613366       |
| C3     | Br6    | 1.1398402451         |
| C4     | Br6    | 0.10466649019        |
| S5     | Br6    | 0.037435515748       |
| C1     | H7     | 0.97486296348        |
| C2     | H7     | 0.046858145699       |
| C3     | H7     | 0.009685190011       |
| C4     | H7     | 0.013733669567       |
| S5     | H7     | 0.043239302363       |
| Br6    | H7     | 0.0024466338544      |
| C1     | H8     | 0.053509515156       |
| C2     | H8     | 0.96521616675        |
| C3     | H8     | 0.038260001327       |
| C4     | H8     | 0.0075794022894      |
| S5     | H8     | 0.018558702388       |
| Br6    | H8     | 0.013843949038       |
| H7     | H8     | 0.0038084551036      |
| C1     | H9     | 0.013328304009       |
| C2     | H9     | 0.0086714369393      |

|     |    |                 |
|-----|----|-----------------|
| C3  | H9 | 0.047372432944  |
| C4  | H9 | 0.96690087618   |
| S5  | H9 | 0.040277248647  |
| Br6 | H9 | 0.014111676709  |
| H7  | H9 | 0.0017943069444 |
| H8  | H9 | 0.0013283043771 |

### 3-THIOPHENECARBALDEHYDE

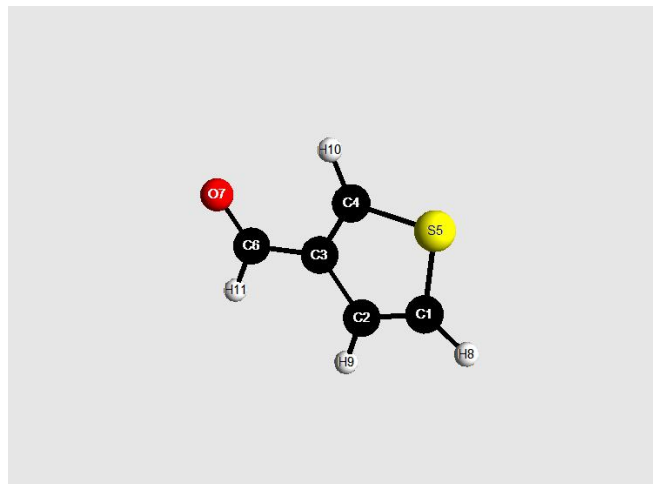

#### HARTREE-FOCK

| Atom A | Atom B | Delocalization index |
|--------|--------|----------------------|
| C1     | C2     | 1.6103783416         |
| C1     | C3     | 0.08910084054        |
| C2     | C3     | 1.1727044021         |
| C1     | C4     | 0.13935942619        |
| C2     | C4     | 0.08774670476        |
| C3     | C4     | 1.5283812926         |
| C1     | S5     | 1.2466003317         |
| C2     | S5     | 0.14435953887        |
| C3     | S5     | 0.14482762538        |
| C4     | S5     | 1.2987803759         |
| C1     | C6     | 0.0088386776871      |
| C2     | C6     | 0.043740617983       |
| C3     | C6     | 0.98576943897        |
| C4     | C6     | 0.063281509593       |
| S5     | C6     | 0.02190404001        |
| C1     | O7     | 0.0052289691511      |
| C2     | O7     | 0.016676252403       |
| C3     | O7     | 0.12706007587        |
| C4     | O7     | 0.053777586689       |
| S5     | O7     | 0.013438916837       |
| C6     | O7     | 1.2979029885         |
| C1     | H8     | 0.97725730565        |
| C2     | H8     | 0.047305498741       |
| C3     | H8     | 0.0096914610203      |
| C4     | H8     | 0.013459845612       |
| S5     | H8     | 0.043405170837       |
| C6     | H8     | 0.0011330381343      |
| O7     | H8     | 0.00086258273637     |
| C1     | H9     | 0.05615251018        |
| C2     | H9     | 0.97064225342        |



|    |     |                  |
|----|-----|------------------|
| C3 | H9  | 0.037401523263   |
| C4 | H9  | 0.0085139473301  |
| S5 | H9  | 0.019033733382   |
| C6 | H9  | 0.0050797463627  |
| O7 | H9  | 0.0014619172962  |
| H8 | H9  | 0.0038673161458  |
| C1 | C1  | 0.012858324594   |
| C2 | C1  | 0.0090978361197  |
| C3 | C1  | 0.04005147764    |
| C4 | C1  | 0.95762770057    |
| S5 | C1  | 0.041235806713   |
| C6 | C1  | 0.003774867871   |
| O7 | C1  | 0.014259161301   |
| H8 | C1  | 0.0017027416834  |
| H9 | C1  | 0.0013803947508  |
| C1 | H11 | 0.00091805533209 |
| C2 | H11 | 0.0083457299315  |
| C3 | H11 | 0.049345513189   |
| C4 | H11 | 0.0070494214597  |
| S5 | H11 | 0.003125166709   |
| C6 | H11 | 0.88792440389    |
| O7 | H11 | 0.12122393997    |
| H8 | H11 | 2.8388057197e-05 |
| H9 | H11 | 0.0057803256968  |
| C1 | H11 | 0.0005868699909  |

## 2-BROMOTHIOPHENE

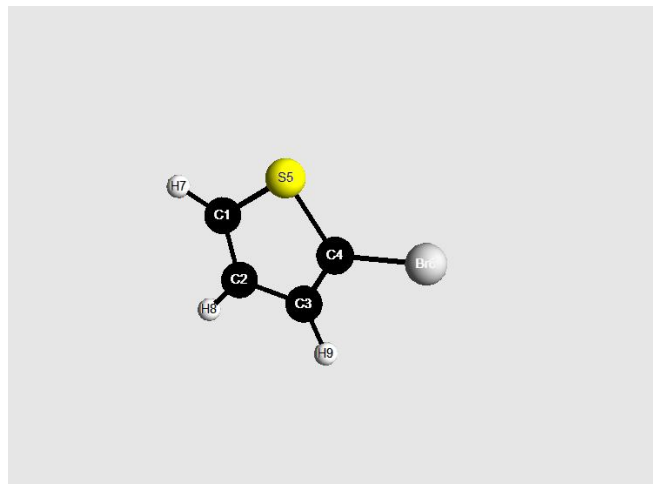

### HARTREE-FOCK

| Atom A | Atom B | Delocalization index |
|--------|--------|----------------------|
| C1     | C2     | 1.6149735592         |
| C1     | C3     | 0.087147991976       |
| C2     | C3     | 1.1721379587         |
| C1     | C4     | 0.13954163082        |
| C2     | C4     | 0.092252493157       |
| C3     | C4     | 1.5792413602         |
| C1     | S5     | 1.2404732502         |
| C2     | S5     | 0.14664808548        |
| C3     | S5     | 0.14059239104        |
| C4     | S5     | 1.2322908875         |
| C1     | Br6    | 0.027851032402       |
| C2     | Br6    | 0.017997725015       |
| C3     | Br6    | 0.093615692598       |
| C4     | Br6    | 1.1752830848         |
| S5     | Br6    | 0.096420579626       |
| C1     | H7     | 0.97631019661        |
| C2     | H7     | 0.047093707037       |
| C3     | H7     | 0.0095906328819      |
| C4     | H7     | 0.013326825714       |
| S5     | H7     | 0.043242276663       |
| Br6    | H7     | 0.0037728561342      |
| C1     | H8     | 0.056991913111       |
| C2     | H8     | 0.9728739716         |
| C3     | H8     | 0.038022471862       |
| C4     | H8     | 0.0083388040681      |
| S5     | H8     | 0.019252246113       |
| Br6    | H8     | 0.0025345496624      |
| H7     | H8     | 0.0040182648966      |
| C1     | H9     | 0.0079574927128      |
| C2     | H9     | 0.035536337014       |

|     |    |                 |
|-----|----|-----------------|
| C3  | H9 | 0.9645338658    |
| C4  | H9 | 0.057564927937  |
| S5  | H9 | 0.017798957894  |
| Br6 | H9 | 0.014715062225  |
| H7  | H9 | 0.0013209233572 |
| H8  | H9 | 0.0027007695245 |
